# Supplementary material for: Highly stereoselective nickel-catalyzed difluoroalkylation of aryl ketones to tetrasubstituted monofluoroalkenes and quaternary alkyl difluorides
Source: PubMed Central journal article supplement (PMC7003883; doi:10.1039/c9sc02806d), 2019-08-20

---

## Supporting Information For

### Highly Stereoselective Nickel-Catalyzed Difluoroalkylation of Aryl Ketones to Tetrasubstituted Monofluoroalkenes and Quaternary Alkyl Difluorides

Chao Li<sup>†</sup>, Yi-Xuan Cao<sup>†</sup>, Ruo-Xing Jin, Kang-Jie Bian, Zi-Yang Qin, Quan Lan and Xi-Sheng Wang \*

Hefei National Laboratory for Physical Sciences at the Microscale and Department of Chemistry,  
Center for Excellence in Molecular Synthesis of CAS,  
University of Science and Technology of China,  
96 Jinzhai Road, Hefei, Anhui 230026, China

### Table of Contents

|                                                                                          |     |
|------------------------------------------------------------------------------------------|-----|
| <b>General Information</b>                                                               | S2  |
| <b>Tables of the Optimization of Reaction Conditions of Monofluoroalkenes</b>            | S3  |
| <b>Tables of the Optimization of Reaction Conditions of Quaternary Alkyl Difluorides</b> | S6  |
| <b>General Procedure for Monofluoroalkenes and Quaternary Alkyl Difluorides</b>          | S10 |
| <b>Mechanistic Studies</b>                                                               | S27 |
| <b>References</b>                                                                        | S31 |
| <b>X-Ray crystal data of 3c</b>                                                          | S32 |
| <b>X-Ray crystal data of 6</b>                                                           | S37 |
| <b><sup>1</sup>H, <sup>13</sup>C, and <sup>19</sup>F NMR Spectra</b>                     | S43 |

---

## General Information:

NMR spectra were recorded on Bruker-400 MHz NMR spectrometer (400 MHz for  $^1\text{H}$ ; 101 MHz for  $^{13}\text{C}$  and 376 MHz for  $^{19}\text{F}$  ( $^1\text{H}$ ,  $^{13}\text{C}$  decoupled}).  $^1\text{H}$  NMR chemical shifts were determined relative to internal  $(\text{CH}_3)_4\text{Si}$  (TMS) at  $\delta$  0.0 or at the signal of a residual protonated solvent:  $\text{CDCl}_3$   $\delta$  7.26.  $^{13}\text{C}$  NMR chemical shifts were determined relative to  $\text{CDCl}_3$   $\delta$  77.16.  $^{19}\text{F}$  NMR chemical shifts were determined relative to  $\text{CFC}_3$  at  $\delta$  0.0. Data for  $^1\text{H}$ ,  $^{13}\text{C}$ ,  $^{19}\text{F}$  NMR are recorded as follows: chemical shift ( $\delta$ , ppm), multiplicity (s = singlet, d = doublet, t = triplet, m = multiplet, q = quartet, br = broad). High resolution mass spectra were recorded on P-SIMS-Gly of BrukerDaltonics Inc. using ESI-TOF (electrospray ionization-time of flight). THF was distilled from sodium immediately before use. LDA was obtained from Energy-chemical used as received (2 mol/L).  $\text{NiCl}_2(\text{PPh}_3)_2$  was obtained from Energy-chemical and used as received. XantPhos was obtained from aladdin and used as received.  $\text{ZnCl}_2$  was evacuated and heated under oil bath of  $150^\circ\text{C}$  for 8 h before use.  $\text{BrCF}_2\text{CO}_2\text{Et}$  was obtained from Fluorochem Ltd (UK) (J&K purchased) and used as received.

## Tables of the Optimization of Reaction Conditions of Monofluoroalkenes

**Table S1.** Fluoroalkylating Reagents Screening<sup>[a]</sup>

| Entry | R                            | Yield (%) | E/Z <sup>b</sup> |
|-------|------------------------------|-----------|------------------|
| 1     | OEt, <b>2a</b>               | 85        | 4:1              |
| 2     | NEt <sub>2</sub> , <b>2b</b> | 72        | 7:1              |
| 3     | NPh <sub>2</sub> , <b>2c</b> | 91        | >99:1            |

[a] Reaction conditions: **1a** (0.2 mmol, 1 equiv), **2** (3 equiv), NiCl<sub>2</sub>(PPh<sub>3</sub>)<sub>2</sub> (10 mol%), XantPhos (10 mol%), LDA (105 mol%), THF (2 mL), -10 °C, 12 h, N<sub>2</sub>. Isolated yields.

[b] E/Z ratio was determined by <sup>19</sup>F NMR analysis.

**Table S2.** Base Screening<sup>[a]</sup>

| Entry | Base                           | Yield (%) <sup>[b]</sup> |
|-------|--------------------------------|--------------------------|
| 1     | <sup>t</sup> BuOK              | trace                    |
| 2     | NaH                            | trace                    |
| 3     | NaOMe                          | trace                    |
| 4     | K <sub>2</sub> CO <sub>3</sub> | trace                    |
| 5     | K <sub>3</sub> PO <sub>4</sub> | trace                    |
| 6     | LiHMDS                         | 59                       |
| 7     | NaHMDS                         | 50                       |
| 8     | KHMDS                          | 44                       |
| 9     | LDA                            | 91                       |

[a] General conditions: **1a** (0.2 mmol), **2c** (3 eq.), NiCl<sub>2</sub>(PPh<sub>3</sub>)<sub>2</sub> (10 mol%), XantPhos (10 mol%), Base (105 mol%), THF (2 mL), 12 h, N<sub>2</sub>, -10 °C. [b] Isolated Yield. E/Z > 99:1.

**Table S3.** Catalyst Screening<sup>[a]</sup>

| Entry | [Ni]                    | Yield (%) <sup>[b]</sup> | Entry | [Ni]                                                 | Yield (%) <sup>[b]</sup> |
|-------|-------------------------|--------------------------|-------|------------------------------------------------------|--------------------------|
| 1     | NiCl <sub>2</sub>       | 45                       | 7     | NiCl <sub>2</sub> •dppe                              | 70                       |
| 2     | NiBr <sub>2</sub>       | 53                       | 8     | Ni(acac) <sub>2</sub>                                | 15                       |
| 3     | NiI <sub>2</sub>        | 59                       | 9     | Ni(COD) <sub>2</sub>                                 | 85                       |
| 4     | Ni(OTf) <sub>2</sub>    | 14                       | 10    | Ni(NO <sub>3</sub> ) <sub>2</sub> •6H <sub>2</sub> O | 7                        |
| 5     | NiCl <sub>2</sub> •dppf | 55                       | 11    | NiCl <sub>2</sub> •glyme                             | 61                       |
| 6     | Ni(OAc) <sub>2</sub>    | 7                        | 12    | NiCl <sub>2</sub> •(PPh <sub>3</sub> ) <sub>2</sub>  | 91                       |

[a] General conditions: **1a** (0.2 mmol), **2c** (3 eq.), [Ni] (10 mol%), XantPhos (10 mol%), LDA (105 mol%), THF (2 mL), 12 h, N<sub>2</sub>, -10 °C. [b] Isolated Yield. E/Z > 99:1.

**Table S4. Ligand Screening<sup>[a]</sup>**

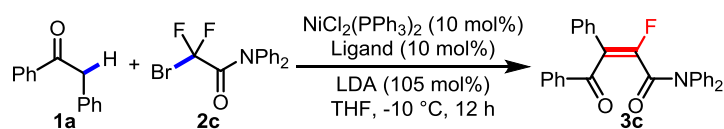

| Entry | Ligand           | Yield (%) <sup>[b]</sup> | Entry | Ligand | Yield (%) <sup>[b]</sup> |
|-------|------------------|--------------------------|-------|--------|--------------------------|
| 1     | XantPhos         | 91                       | 16    | L9     | 23                       |
| 2     | x-phos           | 36                       | 17    | L10    | 41                       |
| 3     | PCy <sub>3</sub> | 43                       | 18    | L11    | 30                       |
| 4     | PPh <sub>3</sub> | 38                       | 19    | L12    | 33                       |
| 5     | BINAP            | 20                       | 20    | L13    | 24                       |
| 6     | IPr•HCl          | 18                       | 21    | L14    | 36                       |
| 7     | Phen             | 36                       | 22    | L15    | 13                       |
| 8     | L1               | trace                    | 23    | L16    | 32                       |
| 9     | L2               | 14                       | 24    | L17    | 20                       |
| 10    | L3               | 17                       | 25    | L18    | 20                       |
| 11    | L4               | 28                       | 26    | L19    | 15                       |
| 12    | L5               | 32                       | 27    | L20    | 36                       |
| 13    | L6               | 32                       | 28    | L21    | 37                       |
| 14    | L7               | 33                       | 29    | L22    | 15                       |
| 15    | L8               | 42                       | 30    | L23    | 22                       |

[a] General conditions: **1a** (0.2 mmol), **2c** (3 eq.),  $\text{NiCl}_2(\text{PPh}_3)_2$  (10 mol%), Ligand (10 mol%), LDA (105 mol%), THF (2 mL), 12 h,  $\text{N}_2$ ,  $-10^\circ\text{C}$ . [b] Isolated Yield. E/Z > 99:1.

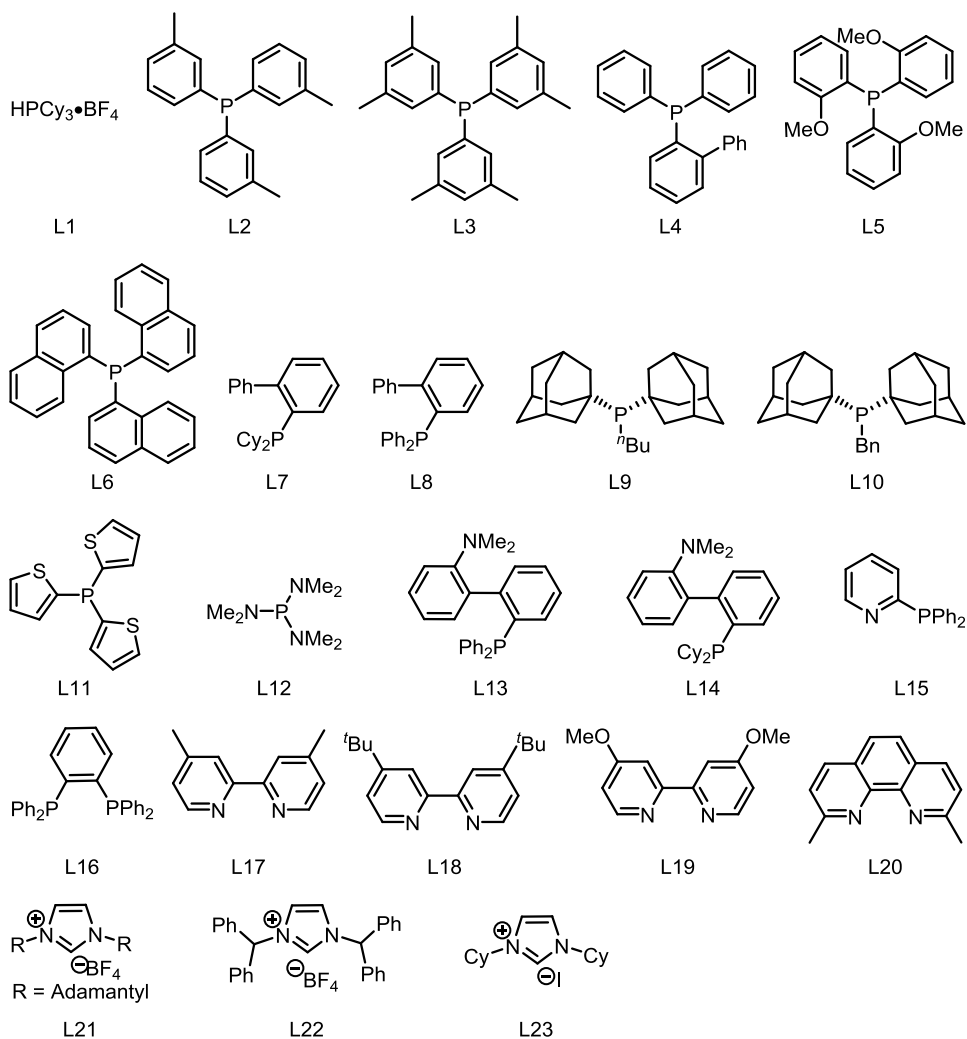

**Table S5. Loading of Reagent Screening**<sup>[a]</sup>

Reaction scheme showing the synthesis of **3c** from **1a** and **2c** using  $\text{NiCl}_2(\text{PPh}_3)_2$  (10 mol%), XantPhos (10 mol%), LDA (105 mol%), THF,  $-10^\circ\text{C}$ , 12 h.

| Entry | x | Yield (%) <sup>[b]</sup> | Entry | x | Yield (%) <sup>[b]</sup> |
|-------|---|--------------------------|-------|---|--------------------------|
| 1     | 1 | 68                       | 4     | 4 | 85                       |
| 2     | 2 | 74                       | 5     | 5 | 89                       |
| 3     | 3 | 91                       |       |   |                          |

[a] General conditions: **1a** (0.2 mmol), **2c** (x eq.),  $\text{NiCl}_2(\text{PPh}_3)_2$  (10 mol%), XantPhos (10 mol%), LDA (105 mol%), THF (2 mL), 12 h,  $\text{N}_2$ ,  $-10^\circ\text{C}$ . [b] Isolated Yield. E/Z > 99:1.

**Table S6. Temperature Screening**<sup>[a]</sup>

Reaction scheme showing the synthesis of **3c** from **1a** and **2c** using  $\text{NiCl}_2(\text{PPh}_3)_2$  (10 mol%), XantPhos (10 mol%), LDA (105 mol%), THF,  $T^\circ\text{C}$ , 12 h.

| Entry            | T   | Yield (%) <sup>[b]</sup> |
|------------------|-----|--------------------------|
| 1                | -30 | 91                       |
| 2 <sup>[c]</sup> | -10 | 91                       |
| 3                | 0   | 62                       |
| 4                | 50  | 45                       |

[a] General conditions: **1a** (0.2 mmol), **2c** (3 eq.),  $\text{NiCl}_2(\text{PPh}_3)_2$  (10 mol%), XantPhos (10 mol%), LDA (105 mol%), THF (2 mL), 12 h,  $\text{N}_2$ ,  $T^\circ\text{C}$ . [b] Isolated Yield. [c] t = 24 h. E/Z > 99:1.

**Table S7. Solvent Screening**<sup>[a]</sup>

Reaction scheme showing the synthesis of **3c** from **1a** and **2c** using  $\text{NiCl}_2(\text{PPh}_3)_2$  (10 mol%), XantPhos (10 mol%), LDA (105 mol%), Solvent,  $-10^\circ\text{C}$ , 12 h.

| Entry | Solvent | Yield (%) <sup>[b]</sup> | Entry | Solvent | Yield (%) <sup>[b]</sup> |
|-------|---------|--------------------------|-------|---------|--------------------------|
| 1     | Toluene | trace                    | 4     | NMP     | 0                        |
| 2     | MeCN    | 0                        | 5     | Dioxane | 53                       |
| 3     | DMF     | 0                        |       |         |                          |

[a] General conditions: **1a** (0.2 mmol), **2c** (3 eq.),  $\text{NiCl}_2(\text{PPh}_3)_2$  (10 mol%), XantPhos (10 mol%), LDA (105 mol%), solvent (2 mL), 12 h,  $\text{N}_2$ ,  $-10^\circ\text{C}$ . [b] Isolated Yield. E/Z > 99:1.

**Table S8.** Time Screening<sup>[a]</sup>

| Entry | t | Yield (%) <sup>[b]</sup> | Entry | t | Yield (%) <sup>[b]</sup> |
|-------|---|--------------------------|-------|---|--------------------------|
| 1     | 1 | 60                       | 3     | 6 | 74                       |
| 2     | 3 | 64                       | 4     | 9 | 80                       |

[a] General conditions: **1a** (0.2 mmol), **2c** (3 eq.), NiCl<sub>2</sub>(PPh<sub>3</sub>)<sub>2</sub> (10 mol%), XantPhos (10 mol%), LDA (105 mol%), THF (2 mL), t h, N<sub>2</sub>, -10 °C. [b] Isolated Yield. E/Z > 99:1.

## Tables of the Optimization of Reaction Conditions of Quaternary Alkyl Difluorides

**Table S9.** Base Screening<sup>[a]</sup>

| Entry | Base               | Yield (%) <sup>[b]</sup> |
|-------|--------------------|--------------------------|
| 1     | <sup>t</sup> BuOK  | trace                    |
| 2     | <sup>t</sup> BuOLi | trace                    |
| 3     | <sup>t</sup> BuONa | trace                    |
| 4     | LDA                | 15                       |
| 5     | LiHMDS             | 12                       |

[a] General conditions: **4a** (0.2 mmol), **2a** (3 eq.), NiCl<sub>2</sub>(PPh<sub>3</sub>)<sub>2</sub> (10 mol%), XantPhos (10 mol%), Base (105 mol%), THF (2 mL), 12 h, N<sub>2</sub>. [b] Isolated Yield.

**Table S10.** Catalyst Screening<sup>[a]</sup>

| Entry | [Ni]                    | Yield (%) <sup>[b]</sup> | Entry | [Ni]                                                 | Yield (%) <sup>[b]</sup> |
|-------|-------------------------|--------------------------|-------|------------------------------------------------------|--------------------------|
| 1     | NiCl <sub>2</sub>       | 49                       | 7     | NiCl <sub>2</sub> -dppe                              | 70                       |
| 2     | NiBr <sub>2</sub>       | 53                       | 8     | Ni(acac) <sub>2</sub>                                | 15                       |
| 3     | NiI <sub>2</sub>        | 45                       | 9     | Ni(COD) <sub>2</sub>                                 | 56                       |
| 4     | Ni(OTf) <sub>2</sub>    | 14                       | 10    | Ni(NO <sub>3</sub> ) <sub>2</sub> ·6H <sub>2</sub> O | 7                        |
| 5     | NiCl <sub>2</sub> -dppf | 55                       | 11    | NiCl <sub>2</sub> -glyme                             | 61                       |
| 6     | Ni(OAc) <sub>2</sub>    | 7                        | 12    | Ni(PPh <sub>3</sub> ) <sub>4</sub>                   | 62                       |

[a] General conditions: **4a** (0.2 mmol), **2a** (3 eq.), [Ni] (10 mol%), XantPhos (10 mol%), LDA (105 mol%), THF (2 mL), 12 h, N<sub>2</sub>. [b] Isolated Yield.

**Table S11. Loading of Reactant<sup>[a]</sup>**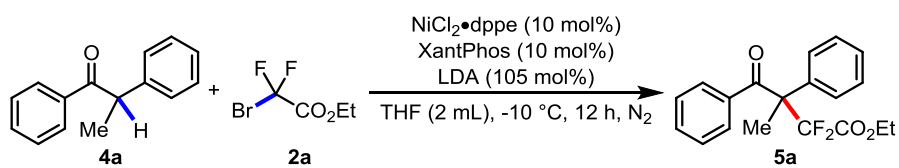

| Entry | x | Yield (%) <sup>[b]</sup> | Entry | x | Yield (%) <sup>[b]</sup> |
|-------|---|--------------------------|-------|---|--------------------------|
| 1     | 1 | 26                       | 4     | 4 | 68                       |
| 2     | 2 | 61                       | 5     | 5 | 63                       |
| 3     | 3 | 70                       | 6     | 6 | 60                       |

[a] General conditions: **4a** (0.2 mmol), **2a** (x eq.),  $\text{NiCl}_2 \cdot \text{dppe}$  (10 mol%), XantPhos (10 mol%), LDA (105 mol%), THF (2 mL), 12 h,  $\text{N}_2$ . [b] Isolated Yield.

**Table S12. Ligand Screening<sup>[a]</sup>**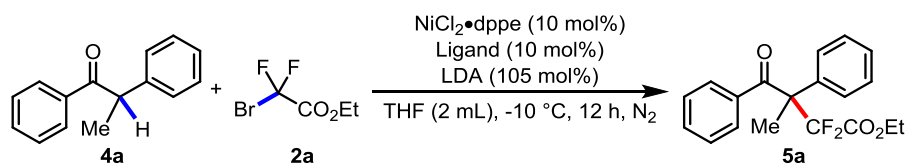

| Entry | Ligand         | Yield (%) <sup>[b]</sup> | Entry | Ligand | Yield (%) <sup>[b]</sup> |
|-------|----------------|--------------------------|-------|--------|--------------------------|
| 1     | XantPhos       | 70                       | 21    | L14    | 38                       |
| 2     | x-phos         | 23                       | 22    | dppe   | 39                       |
| 3     | $\text{PCy}_3$ | 43                       | 23    | dppp   | 53                       |
| 4     | $\text{PPh}_3$ | trace                    | 24    | L15    | 28                       |
| 5     | bpy            | 20                       | 25    | L16    | 47                       |
| 6     | dtbpy          | 18                       | 26    | L17    | 62                       |
| 7     | dppf           | 29                       | 27    | L18    | 35                       |
| 8     | L1             | 38                       | 28    | L19    | 11                       |
| 9     | L2             | 24                       | 29    | L20    | 25                       |
| 10    | L3             | 47                       | 30    | BINAP  | 32                       |
| 11    | L4             | 26                       | 31    | L21    | 7                        |
| 12    | L5             | 39                       | 32    | L22    | 20                       |
| 13    | L6             | 40                       | 33    | L23    | 23                       |
| 14    | L7             | 29                       | 34    | L24    | 24                       |
| 15    | L8             | 35                       | 35    | L25    | 40                       |
| 16    | L9             | 32                       | 36    | L26    | 30                       |
| 17    | L10            | 24                       | 37    | L27    | 20                       |
| 18    | L11            | 43                       | 38    | L28    | 7                        |
| 19    | L12            | 41                       | 39    | L29    | 21                       |
| 20    | L13            | 37                       | 40    | L30    | 22                       |

[a] General conditions: **4a** (0.2 mmol), **2a** (3 eq.),  $\text{NiCl}_2 \cdot \text{dppe}$  (10 mol%), Ligand (10 mol%), LDA (105 mol%), THF (2 mL), 12 h,  $\text{N}_2$ . [b] Isolated Yield.

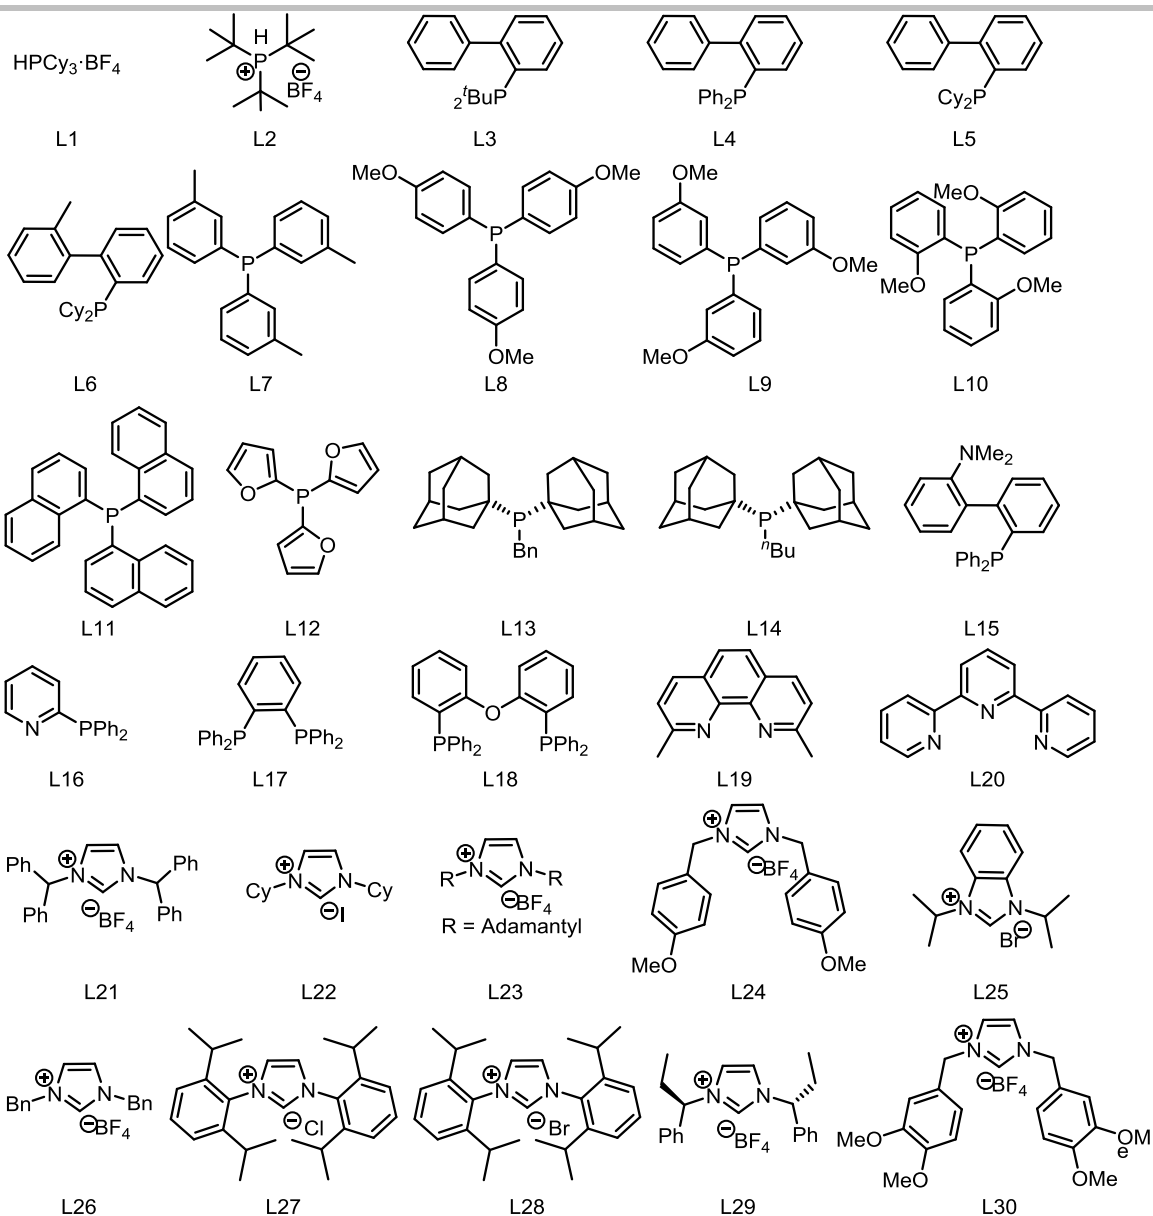

**Table S13.** Solvent Screening<sup>[a]</sup>

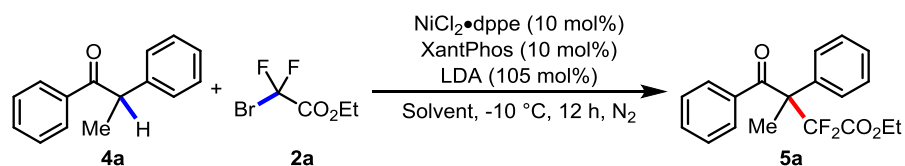

| Entry | Solvent | Yield (%) <sup>[b]</sup> | Entry | Solvent | Yield (%) <sup>[b]</sup> |
|-------|---------|--------------------------|-------|---------|--------------------------|
| 1     | Toluene | trace                    | 4     | NMP     | 0                        |
| 2     | MeCN    | 0                        | 5     | Dioxane | 38                       |
| 3     | DMF     | 0                        |       |         |                          |

[a] General conditions: **4a** (0.2 mmol), **2a** (3 eq.), NiCl<sub>2</sub>·dppe (10 mol%), XantPhos (10 mol%), LDA (105 mol%), Solvent (2 mL), 12 h, N<sub>2</sub>. [b] Isolated Yield.



**Table S14. Zinc Screening**<sup>[a]</sup>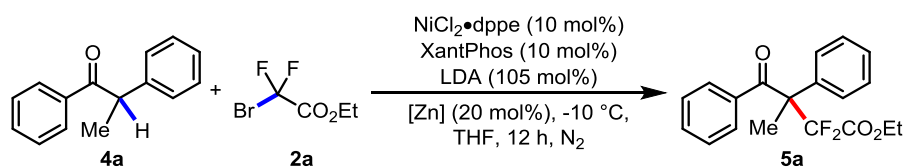

| Entry | Zn                | Yield (%) <sup>[b]</sup> | Entry | Zn                   | Yield (%) <sup>[b]</sup> |
|-------|-------------------|--------------------------|-------|----------------------|--------------------------|
| 1     | ZnCl <sub>2</sub> | 95                       | 5     | ZnO                  | 57                       |
| 2     | ZnBr <sub>2</sub> | 69                       | 6     | Zn(OAc) <sub>2</sub> | 62                       |
| 3     | ZnI <sub>2</sub>  | 57                       | 7     | Zn(OTf) <sub>2</sub> | 57                       |
| 4     | ZnF <sub>2</sub>  | 50                       |       |                      |                          |

[a] General conditions: **4a** (0.2 mmol), **2a** (3 eq.), NiCl<sub>2</sub>•dppe (10 mol%), XantPhos (10 mol%), LDA (105 mol%), THF(2 mL), [Zn] (20 mol%), 12 h, N<sub>2</sub>. [b] Isolated Yield.

**Table S15. Loading of Zinc Screening**<sup>[a]</sup>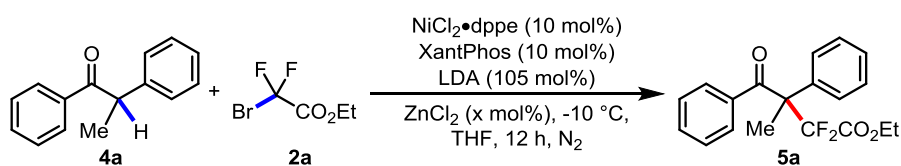

| Entry | x    | Yield (%) <sup>[b]</sup> | Entry | x   | Yield (%) <sup>[b]</sup> |
|-------|------|--------------------------|-------|-----|--------------------------|
| 1     | 0.05 | 66                       | 5     | 0.3 | 64                       |
| 2     | 0.15 | 74                       | 6     | 1   | 69                       |
| 3     | 0.2  | 95                       | 7     | 2.3 | 66                       |
| 4     | 0.25 | 80                       |       |     |                          |

[a] General conditions: **4a** (0.2 mmol), **2a** (3 eq.), NiCl<sub>2</sub>•dppe (10 mol%), XantPhos (10 mol%), LDA (105 mol%), THF (2 mL), ZnCl<sub>2</sub> (x mol%), 12 h, N<sub>2</sub>. [b] Isolated Yield.

**Table S16. Time of Reaction Screening**<sup>[a]</sup>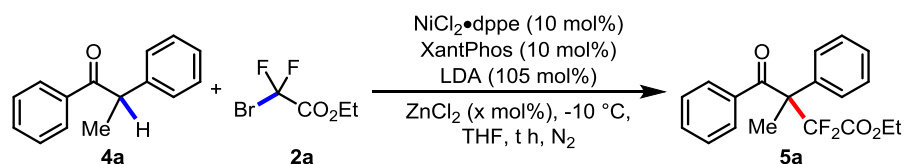

| Entry | t | Yield (%) <sup>[b]</sup> | Entry | t | Yield (%) <sup>[b]</sup> |
|-------|---|--------------------------|-------|---|--------------------------|
| 1     | 1 | 60                       | 3     | 6 | 74                       |
| 2     | 3 | 64                       | 4     | 9 | 80                       |

[a] General conditions: **4a** (0.2 mmol), **2a** (3 eq.), NiCl<sub>2</sub>•dppe (10 mol%), XantPhos (10 mol%), LDA (105 mol%), THF(2 mL), ZnCl<sub>2</sub> (20 mol%), t h, N<sub>2</sub>. [b] Isolated Yield.

## General Procedure for Highly Stereoselective Nickel-Catalyzed Difluoroalkylation of Aryl Ketones to Tetrasubstituted Monofluoroalkenes and Quaternary Alkyl Difluorides

To a 50 mL of Schlenk tube was added ketone **1** (1.0 equiv, 0.2 mmol), NiCl<sub>2</sub>•(PPh<sub>3</sub>)<sub>2</sub> (10 mol%, 0.02 mmol) and XantPhos (10 mol%, 0.02 mmol) under air. The mixture was evacuated and backfilled with N<sub>2</sub> (3 times). THF (2 mL) was added then followed by LDA (105 mol%, 0.21 mmol) subsequently. The Schlenk tube was then sealed with a Teflon lined cap and put into a cooled bath (-10 °C). After stirring for 5 min, the reaction mixture was added 2-bromo-2,2-difluoro-N,N-diphenylacetamide **2c** (3.0 equiv, 0.6 mmol), then sealed with a Teflon lined cap and put into a cooled bath (-10 °C) for 12 h. And the mixture was added ethyl acetate 5 mL, then solvent was removed under reduced pressure and purified by flash column chromatography on silica gel to give product.

To a 50 mL of Schlenk tube was added ketone **4** (1.0 equiv, 0.2 mmol), NiCl<sub>2</sub>•dppe (10 mol%, 0.02 mmol) and XantPhos (10 mol%, 0.02 mmol) under air, followed by ZnCl<sub>2</sub> (0.2 equiv, 0.04 mmol). The mixture was evacuated and backfilled with N<sub>2</sub> (3 times). THF (2 mL) was added then followed by LDA (105 mol%, 0.21 mmol) subsequently. The Schlenk tube was then sealed with a Teflon lined cap and put into a cooled bath (-10 °C). After stirring for 5 min, the reaction mixture was added boron difluoroacetate **2a** (3.0 equiv, 0.6 mmol), then sealed with a Teflon lined cap and put into a cooled bath (-10 °C) for 12 h. And the mixture was added ethyl acetate 5 mL, then solvent was removed under reduced pressure and purified by flash column chromatography on silica gel to give product.

### Preparation of non-fluorine substituted olefin.

A (20 mL) of Schlenk tube was evacuated and backfilled with N<sub>2</sub> (3 times). The ketone **3s** (1.0 equiv, 0.2 mmol) was added then followed by THF (5 mL) subsequently in N<sub>2</sub> atmosphere. The Schlenk tube was then sealed with a Teflon lined cap and put into a cooled bath (-20 °C). And the reaction mixture was added EtMgBr (1.2 equiv, 0.24 mmol) dropwise, after 2 hours the temperature was up to 0 °C, the reaction was detected by TLC. Then mixture was quenched by saturated NH<sub>4</sub>Cl solution, and extract 3 times by adding ethyl acetate (10 mL×3), after dehydration by adding Na<sub>2</sub>SO<sub>4</sub>, the solvents were removed by reduced pressure and purified by flash column chromatography on silica gel to give product **6**.

A (20 mL) of Schlenk tube was evacuated and backfilled with N<sub>2</sub> (3 times). The ketone **3s** (1.0 equiv, 0.2 mmol) was added then followed by THF (5 mL) subsequently in N<sub>2</sub> atmosphere. The Schlenk tube was then sealed with a Teflon lined cap and put into a cooled bath (-20 °C). And the reaction mixture was added PhMgBr (1.2 equiv, 0.24 mmol) dropwise, after 2 hours the temperature was up to 0 °C, the reaction was detected by TLC. Then mixture was added saturated NH<sub>4</sub>Cl solution, and extract 3 times by adding ethyl acetate (10 mL×3), after dehydration by adding Na<sub>2</sub>SO<sub>4</sub>, the solvents were removed by reduced pressure and purified by flash column chromatography on silica gel to give product **7**.

A (20 mL) of Schlenk tube was evacuated and backfilled with N<sub>2</sub> (3 times). The ketone **3s** (1.0 equiv, 0.2 mmol) was added then followed by THF (5 mL) subsequently in N<sub>2</sub> atmosphere. The Schlenk tube was then sealed with a Teflon lined cap and put into a cooled bath (-20 °C). And the reaction mixture was added PhC≡CMgBr (1.2 equiv, 0.24 mmol) dropwise, after 2 hours the temperature was up to 0 °C, the reaction was detected by TLC. Then mixture was added saturated NH<sub>4</sub>Cl solution, and extract 3 times by adding ethyl acetate (10 mL×3), after dehydration by adding Na<sub>2</sub>SO<sub>4</sub>, the solvents were removed by reduced pressure and purified by flash column chromatography on silica gel to give product **8**.

A (20 mL) flask was added ketone **3s** (1.0 equiv, 0.2 mmol), dichloromethane (5 mL), Et<sub>3</sub>N (2 equiv,

0.4 mmol) and BnSH (2 equiv, 0.4 mmol), stirred at room temperature. The reaction was detected by TLC. And the solvent was removed by reduced pressure and purified by flash column chromatography on silica gel to give product **9**.

A (20 mL) of Schlenk tube was evacuated and backfilled with N<sub>2</sub> (3 times). The ketone **3s** (1.0 equiv, 0.2 mmol) was added then followed by THF (5 ml) and BnOH (1.2 equiv, 0.24 mmol) subsequently in N<sub>2</sub> atmosphere. The Schlenk tube was then sealed with a Teflon lined cap and put into a cooled bath (-20 °C). And the reaction mixture was added n-BuLi (1.2 equiv, 0.24 mmol) dropwise, after 2 hours the temperature was up to 0 °C, the reaction was detected by TLC. Then mixture was quenched by saturated NH<sub>4</sub>Cl solution, and extract 3 times by adding ethyl acetate (10 mL×3), after dehydration by adding Na<sub>2</sub>SO<sub>4</sub> the solvents were removed by reduced pressure and purified by flash column chromatography on silica gel to give product **10**.

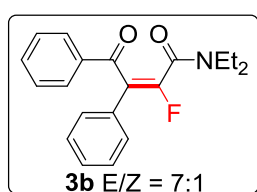

The product **3b** is purified with silica gel chromatography (petroleum ether/ethyl acetate = 10/1 as the eluent) as a yellow oil mixture (72% yield, E/Z = 7:1). <sup>1</sup>H NMR (400 MHz, Chloroform-*d*) δ 8.05 – 8.03 (m, 0.21H, Z), 7.92 – 7.89 (m, 1.62H, E), 7.58 – 7.43 (m, 3.24H), 7.38 – 7.24 (m, 4.69H), 3.46 – 3.26 (m, 4H), 1.27 – 1.23 (m, 2.86H), 1.03 – 0.92 (m, 3.24H). <sup>13</sup>C NMR (101 MHz, Chloroform-*d*) δ 192.72 (d, *J* = 7.7 Hz, E), 192.38 (d, *J* = 3.3 Hz, Z), 161.43 (d, *J* = 29.2 Hz, E), 161.00 (d, *J* = 32.4 Hz, Z), 151.65 (d, *J* = 287.5 Hz, E), 149.12 (d, *J* = 269.7 Hz, Z), 136.63 (d, *J* = 3.9 Hz), 135.84, 134.15, 133.24, 131.14, 130.43 (d, *J* = 7.1 Hz), 129.71, 128.99, 128.94, 128.91, 128.89, 128.83, 128.79, 128.53, 128.25 (d, *J* = 2.9 Hz), 126.98 (d, *J* = 6.2 Hz), 42.99, 42.92, 42.89, 40.25 (E), 39.06 (Z), 14.42 (E), 14.02 (Z), 12.16 (E), 11.96 (Z). <sup>19</sup>F NMR (376 MHz, Chloroform-*d*) δ -105.45 (Z), -113.26 (E). HRMS (ESI) (*m/z*): [M+H]<sup>+</sup> calcd. for C<sub>20</sub>H<sub>21</sub>FNO<sub>2</sub>: 326.1556, found: 326.1584.

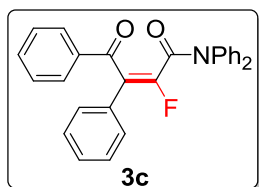

The product **3c** is purified with silica gel chromatography (petroleum ether/ethyl acetate = 10/1 as the eluent) as a white solid (91% yield). <sup>1</sup>H NMR (400 MHz, Chloroform-*d*) δ 7.84 (d, *J* = 7.4 Hz, 2H), 7.62 – 7.07 (m, 18H). <sup>13</sup>C NMR (101 MHz, Chloroform-*d*) δ 192.66 (d, *J* = 6.8 Hz), 162.17 (d, *J* = 28.7 Hz), 151.04 (d, *J* = 286.6 Hz), 141.98, 136.45 (d, *J* = 3.9 Hz), 133.38, 131.10, 129.95, 129.41, 129.16, 128.88, 128.83, 128.62, 127.33, 126.81. <sup>19</sup>F NMR (376 MHz, Chloroform-*d*) δ -113.23. HRMS (ESI) (*m/z*): [M+Na]<sup>+</sup> calcd. for C<sub>28</sub>H<sub>20</sub>O<sub>2</sub>NFNa: 444.1370, found: 444.1376.

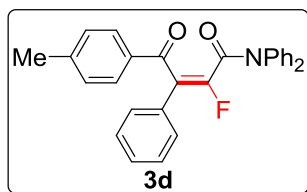

The product **3d** is purified with silica gel chromatography (petroleum ether/ethyl acetate = 10/1 as the eluent) as a white solid (74% yield). <sup>1</sup>H NMR (400 MHz, Chloroform-*d*) δ 7.74 (d, *J* = 8.2 Hz, 2H), 7.39 – 7.11 (m, 17H), 2.33 (s, 3H). <sup>13</sup>C NMR (101 MHz, Chloroform-*d*) δ 192.29 (d, *J* = 6.9 Hz), 162.18 (d, *J* = 28.8 Hz), 150.83 (d, *J* = 286.1 Hz), 144.33, 142.00, 134.04 (d, *J* = 4.0 Hz), 131.26, 130.09, 129.35, 129.07, 128.96, 128.90, 128.86, 128.84, 128.81, 127.29, 126.77, 21.85. <sup>19</sup>F NMR (376 MHz, Chloroform-*d*) δ -113.76. HRMS (ESI) (*m/z*): [M+H]<sup>+</sup> calcd. for C<sub>29</sub>H<sub>23</sub>FO<sub>2</sub>N: 436.1711, found: 436.1707.

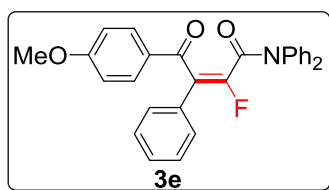

The product **3e** is purified with silica gel chromatography (petroleum ether/ethyl acetate = 10/1 as the eluent) as a white solid (74% yield).  $^1\text{H NMR}$  (400 MHz, Chloroform-*d*)  $\delta$  7.81 (d,  $J$  = 8.9 Hz, 2H), 7.37 – 7.18 (m, 15H), 6.82 (d,  $J$  = 8.9 Hz, 2H), 3.78 (s, 3H).  $^{13}\text{C NMR}$  (101 MHz, Chloroform-*d*)  $\delta$  191.25 (d,  $J$  = 7.0 Hz), 163.76, 162.23 (d,  $J$  = 29.0 Hz), 150.73 (d,  $J$  = 285.6 Hz), 141.99, 132.32, 131.38, 129.59 (d,  $J$  = 4.0 Hz), 129.34, 129.03, 128.82, 128.77, 127.26, 126.77, 113.91, 55.56.  $^{19}\text{F NMR}$  (376 MHz, Chloroform-*d*)  $\delta$  -114.02. HRMS (ESI) ( $m/z$ ):  $[\text{M}+\text{Na}]^+$  calcd. for  $\text{C}_{29}\text{H}_{22}\text{FO}_3\text{NNa}$ : 474.1476, found: 474.1481.

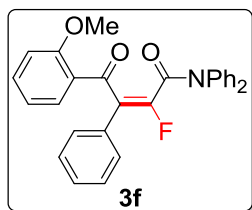

The product **3f** is purified with silica gel chromatography (petroleum ether/ethyl acetate = 10/1 as the eluent) as a white solid (55% yield).  $^1\text{H NMR}$  (400 MHz, Chloroform-*d*)  $\delta$  7.81 – 7.67 (m, 1H), 7.55 – 7.06 (m, 16H), 6.92 (t, 1H), 6.72 (d,  $J$  = 8.4 Hz, 1H), 3.55 (s, 3H).  $^{13}\text{C NMR}$  (101 MHz, Chloroform-*d*)  $\delta$  192.14 (d,  $J$  = 8.6 Hz), 162.40 (d,  $J$  = 29.3 Hz), 158.77, 153.57, 152.17 (d,  $J$  = 282.3 Hz), 134.39, 131.69, 131.20, 129.86 (d,  $J$  = 7.8 Hz), 129.30, 129.11, 129.07, 128.45, 128.06, 127.28, 126.96, 126.73 (d,  $J$  = 3.5 Hz), 120.53, 111.64, 55.40.  $^{19}\text{F NMR}$  (376 MHz, Chloroform-*d*)  $\delta$  -112.49. HRMS (ESI) ( $m/z$ ):  $[\text{M}+\text{H}]^+$  calcd. for  $\text{C}_{29}\text{H}_{23}\text{FO}_3\text{N}$ : 452.1656, found: 452.1661.

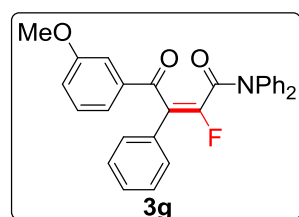

The product **3g** is purified with silica gel chromatography (petroleum ether/ethyl acetate = 10/1 as the eluent) as a white solid (57% yield).  $^1\text{H NMR}$  (400 MHz, Chloroform-*d*)  $\delta$  7.44 – 7.10 (m, 18H), 7.04 – 6.97 (m, 1H), 3.76 (s, 3H).  $^{13}\text{C NMR}$  (101 MHz, Chloroform-*d*)  $\delta$  192.33 (d,  $J$  = 6.9 Hz), 162.11 (d,  $J$  = 28.6 Hz), 159.72, 150.97 (d,  $J$  = 286.6 Hz), 141.99, 137.70 (d,  $J$  = 3.9 Hz), 131.20, 129.61, 129.39, 129.17, 129.02, 128.96, 128.88, 128.83, 128.78, 127.35, 126.76, 123.03, 120.28, 113.45, 55.44.  $^{19}\text{F NMR}$  (376 MHz, Chloroform-*d*)  $\delta$  -113.19. HRMS (ESI) ( $m/z$ ):  $[\text{M}+\text{H}]^+$  calcd. for  $\text{C}_{29}\text{H}_{23}\text{FO}_3\text{N}$ : 452.1656, found: 452.1662.

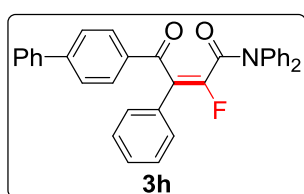

The product **3h** is purified with silica gel chromatography (petroleum ether/ethyl acetate = 10/1 as the eluent) as a white solid (62% yield).  $^1\text{H NMR}$  (400 MHz, Chloroform-*d*)  $\delta$  7.92 (d,  $J$  = 8.2 Hz, 2H), 7.61 – 7.51 (m, 4H), 7.46 – 7.40 (m, 2H), 7.39 – 7.20 (m, 16H).  $^{13}\text{C NMR}$  (101 MHz, Chloroform-*d*)  $\delta$  192.23 (d,  $J$  = 6.9 Hz), 162.21 (d,  $J$  = 28.7 Hz), 150.91 (d,  $J$  = 286.7 Hz), 146.11, 141.99, 140.08, 135.24 (d,  $J$  = 3.9 Hz), 131.13, 130.52, 129.42, 129.21, 129.02, 128.98, 128.94, 128.90, 128.85, 128.31, 127.40, 127.05, 126.78.  $^{19}\text{F NMR}$  (376 MHz, Chloroform-*d*)  $\delta$  -113.48. HRMS (ESI) ( $m/z$ ):  $[\text{M}+\text{H}]^+$  calcd. for  $\text{C}_{34}\text{H}_{25}\text{FO}_2\text{N}$ : 498.1864, found: 498.1863.

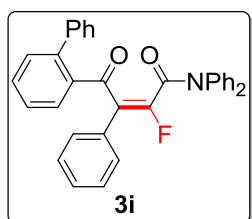

The product **3i** is purified with silica gel chromatography (petroleum ether/ethyl acetate = 10/1 as the eluent) as a white solid (63% yield).  $^1\text{H NMR}$  (400 MHz, Chloroform-*d*)  $\delta$  7.67 (d,  $J$  = 7.6 Hz, 1H), 7.51 – 7.21 (m, 15H), 7.13 (dd,  $J$  = 18.3, 7.4 Hz, 4H), 7.04 (t,  $J$  = 7.4 Hz, 2H), 6.60 (d,  $J$  = 7.7 Hz, 2H).  $^{13}\text{C NMR}$  (101 MHz, Chloroform-*d*)  $\delta$  195.20 (d,  $J$  = 9.2 Hz), 162.19, 154.93 (d,  $J$  = 287.1 Hz), 153.50, 142.15, 141.65, 140.13, 136.98, 136.94, 131.54, 130.92, 130.83, 130.24, 129.55, 129.33, 129.29, 128.25, 128.17, 127.93, 127.60, 127.15, 127.04, 126.95, 126.72, 126.56.  $^{19}\text{F NMR}$  (376 MHz, Chloroform-*d*)  $\delta$  -104.93. HRMS (ESI) ( $m/z$ ):  $[\text{M}+\text{H}]^+$  calcd. for  $\text{C}_{34}\text{H}_{25}\text{FO}_2\text{N}$ : 498.1864, found: 498.1868.

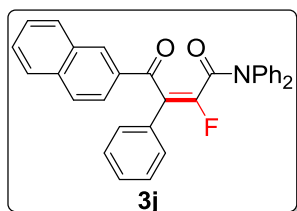

The product **3j** is purified with silica gel chromatography (petroleum ether/ethyl acetate = 10/1 as the eluent) as a white solid (59% yield).  $^1\text{H}$  NMR (400 MHz, Chloroform-*d*)  $\delta$  8.30 (s, 1H), 7.93 (d,  $J = 8.6$  Hz, 1H), 7.85 – 7.76 (m, 3H), 7.58 – 7.51 (m, 1H), 7.50 – 7.45 (m, 1H), 7.40 – 7.16 (m, 15H).  $^{13}\text{C}$  NMR (101 MHz, Chloroform-*d*)  $\delta$  192.60 (d,  $J = 7.0$  Hz), 162.16 (d,  $J = 28.7$  Hz), 151.10 (d,  $J = 286.5$  Hz), 141.97, 135.79, 133.95 (d,  $J = 3.9$  Hz), 132.49, 132.34, 131.27, 129.85, 129.38, 129.18, 128.97, 128.91, 128.87, 128.71, 128.52, 127.84, 127.29, 126.85, 126.72, 124.94.  $^{19}\text{F}$  NMR (376 MHz, Chloroform-*d*)  $\delta$  -112.89. HRMS (ESI) ( $m/z$ ):  $[\text{M}+\text{H}]^+$  calcd. for  $\text{C}_{32}\text{H}_{23}\text{FO}_2\text{N}$ :472.1707, found: 472.1719.

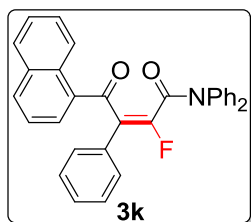

The product **3k** is purified with silica gel chromatography (petroleum ether/ethyl acetate = 10/1 as the eluent) as a white solid (57% yield).  $^1\text{H}$  NMR (400 MHz, Chloroform-*d*)  $\delta$  9.05 – 8.79 (m, 1H), 7.96 – 7.76 (m, 2H), 7.70 – 7.57 (m, 2H), 7.55 – 7.00 (m, 17H).  $^{13}\text{C}$  NMR (101 MHz, Chloroform-*d*)  $\delta$  194.78 (d,  $J = 7.9$  Hz), 162.23 (d,  $J = 29.4$  Hz), 153.05 (d,  $J = 285.6$  Hz), 141.91, 133.90, 133.76, 133.11 (d,  $J = 3.8$  Hz), 132.54, 131.64, 131.17, 129.41, 128.88, 128.83, 128.69, 128.51 (d,  $J = 5.1$  Hz), 127.39, 126.95, 126.56, 125.95, 124.32.  $^{19}\text{F}$  NMR (376 MHz, Chloroform-*d*)  $\delta$  -109.34. HRMS (ESI) ( $m/z$ ):  $[\text{M}+\text{H}]^+$  calcd. for  $\text{C}_{32}\text{H}_{23}\text{FO}_2\text{N}$ :472.1707, found: 472.1712.

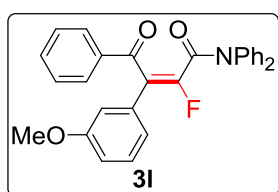

The product **3l** is purified with silica gel chromatography (petroleum ether/ethyl acetate = 10/1 as the eluent) as a white solid (78% yield).  $^1\text{H}$  NMR (400 MHz, Chloroform-*d*)  $\delta$  7.84 (d,  $J = 7.5$  Hz, 2H), 7.45 (t,  $J = 7.4$  Hz, 1H), 7.27 (m, 13H), 6.88 (d,  $J = 8.4$  Hz, 2H), 6.80 (d,  $J = 8.7$  Hz, 1H), 3.70 (s, 3H).  $^{13}\text{C}$  NMR (101 MHz, Chloroform-*d*)  $\delta$  192.51 (d,  $J = 6.9$  Hz), 162.27, 161.99, 159.67, 151.13 (d,  $J = 287.0$  Hz), 141.94, 136.44, 136.41, 133.38, 132.17, 129.89, 129.86, 129.39, 128.80, 128.74, 128.60, 121.29 (d,  $J = 4.7$  Hz), 114.74, 114.38 (d,  $J = 5.3$  Hz), 55.32.  $^{19}\text{F}$  NMR (376 MHz, Chloroform-*d*)  $\delta$  -112.53. HRMS (ESI) ( $m/z$ ):  $[\text{M}+\text{H}]^+$  calcd. for  $\text{C}_{29}\text{H}_{23}\text{FO}_3\text{N}$ :452.1656, found: 452.1663.

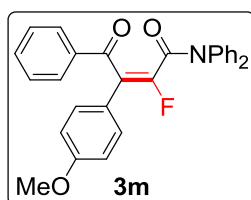

The product **3m** is purified with silica gel chromatography (petroleum ether/ethyl acetate = 10/1 as the eluent) as a white solid (73% yield).  $^1\text{H}$  NMR (400 MHz, Chloroform-*d*)  $\delta$  7.86 (d,  $J = 7.5$  Hz, 2H), 7.60 – 7.08 (m, 15H), 6.80 (d,  $J = 8.8$  Hz, 2H), 3.73 (s, 3H).  $^{13}\text{C}$  NMR (101 MHz, Chloroform-*d*)  $\delta$  192.88 (d,  $J = 6.9$  Hz), 162.37 (d,  $J = 28.5$  Hz), 160.14, 149.83 (d,  $J = 284.8$  Hz), 142.14, 136.57 (d,  $J = 3.9$  Hz), 133.29, 130.44, 130.39, 129.89, 129.36, 129.02, 128.96, 128.61, 127.24, 126.78, 123.40, 114.35, 55.34.  $^{19}\text{F}$  NMR (376 MHz, Chloroform-*d*)  $\delta$  -115.72. HRMS (ESI) ( $m/z$ ):  $[\text{M}+\text{H}]^+$  calcd. for  $\text{C}_{29}\text{H}_{23}\text{FO}_3\text{N}$ :452.1656, found: 452.1663.

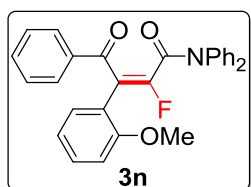

The product **3n** is purified with silica gel chromatography (petroleum ether/ethyl acetate = 10/1 as the eluent) as a white solid (67% yield).  $^1\text{H}$  NMR (400 MHz, Chloroform-*d*)  $\delta$  7.59 (d,  $J = 7.5$  Hz, 2H), 7.40 (t,  $J = 7.4$  Hz, 1H), 7.34 – 7.13 (m, 14H), 6.91 (t,  $J = 7.5$  Hz, 1H), 6.71 (d,  $J = 8.6$  Hz, 1H), 3.54 (s, 3H).  $^{13}\text{C}$  NMR (101 MHz, Chloroform-*d*)  $\delta$  192.91 (d,  $J = 8.7$  Hz), 162.15, 161.85, 154.28 (d,  $J = 281.2$  Hz), 152.88, 141.90, 137.01 (d,  $J = 3.6$  Hz), 132.60, 130.63, 130.47, 130.43, 129.30, 129.19, 128.01, 127.41, 126.55, 123.60, 123.51, 121.11, 120.83, 111.50, 55.42.  $^{19}\text{F}$  NMR (376 MHz, Chloroform-*d*)  $\delta$  -104.26. HRMS (ESI) ( $m/z$ ):  $[\text{M}+\text{H}]^+$  calcd. for  $\text{C}_{29}\text{H}_{23}\text{FO}_3\text{N}$ :452.1656, found: 452.1668.

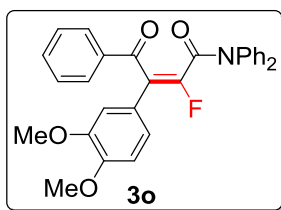

The product **3o** is purified with silica gel chromatography (petroleum ether/ethyl acetate = 10/1 as the eluent) as a white solid (62% yield).  $^1\text{H}$  NMR (400 MHz, Chloroform-*d*)  $\delta$  7.91 – 7.82 (m, 2H), 7.51 – 7.16 (m, 13H), 6.87 (d,  $J$  = 8.5 Hz, 2H), 6.75 (d,  $J$  = 8.2 Hz, 1H), 3.82 (s, 3H), 3.76 (s, 3H).  $^{13}\text{C}$  NMR (101 MHz, Chloroform-*d*)  $\delta$  192.82 (d,  $J$  = 6.8 Hz), 162.36 (d,  $J$  = 28.4 Hz), 150.01 (d,  $J$  = 286.8 Hz), 149.83, 148.96, 142.10, 136.58 (d,  $J$  = 3.8 Hz), 133.33, 129.84, 129.38, 129.21, 129.15, 128.62, 127.25, 126.75, 123.52, 122.30, 122.25, 111.72, 111.66, 111.16, 55.95, 55.92.  $^{19}\text{F}$  NMR (376 MHz, Chloroform-*d*)  $\delta$  -115.28. HRMS (ESI) ( $m/z$ ):  $[\text{M}+\text{H}]^+$  calcd. for  $\text{C}_{30}\text{H}_{25}\text{FO}_4\text{N}$ :482.1762, found: 482.1768.

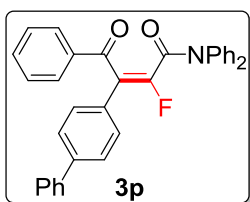

The product **3p** is purified with silica gel chromatography (petroleum ether/ethyl acetate = 10/1 as the eluent) as a white solid (66% yield).  $^1\text{H}$  NMR (400 MHz, Chloroform-*d*)  $\delta$  7.85 – 7.78 (m, 2H), 7.49 – 7.09 (m, 22H).  $^{13}\text{C}$  NMR (101 MHz, Chloroform-*d*)  $\delta$  192.70 (d,  $J$  = 6.8 Hz), 162.19 (d,  $J$  = 28.5 Hz), 150.92 (d,  $J$  = 287.1 Hz), 142.01, 141.89, 140.11, 136.50 (d,  $J$  = 3.8 Hz), 133.46, 129.98, 129.43, 129.33, 129.28, 128.96, 128.79, 128.73, 128.69, 127.89, 127.53, 127.12, 126.79.  $^{19}\text{F}$  NMR (376 MHz, Chloroform-*d*)  $\delta$  -113.25. HRMS (ESI) ( $m/z$ ):  $[\text{M}+\text{H}]^+$  calcd. for  $\text{C}_{34}\text{H}_{25}\text{FO}_2\text{N}$ :498.1864, found: 498.1875.

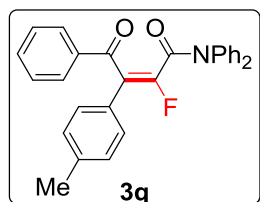

The product **3q** is purified with silica gel chromatography (petroleum ether/ethyl acetate = 10/1 as the eluent) as a white solid (81% yield).  $^1\text{H}$  NMR (400 MHz, Chloroform-*d*)  $\delta$  7.84 (d,  $J$  = 7.3 Hz, 2H), 7.45 (t,  $J$  = 7.4 Hz, 1H), 7.38 – 7.18 (m, 14H), 7.09 (d,  $J$  = 8.0 Hz, 2H), 2.27 (s, 3H).  $^{13}\text{C}$  NMR (101 MHz, Chloroform-*d*)  $\delta$  192.82 (d,  $J$  = 6.9 Hz), 162.45, 162.17, 150.53 (d,  $J$  = 285.8 Hz), 142.06, 139.39, 136.52 (d,  $J$  = 3.9 Hz), 133.31, 129.93, 129.63, 129.38, 129.11, 129.05, 128.79, 128.74, 128.60, 128.19, 127.27, 126.77, 21.43.  $^{19}\text{F}$  NMR (376 MHz, Chloroform-*d*)  $\delta$  -114.20. HRMS (ESI) ( $m/z$ ):  $[\text{M}+\text{H}]^+$  calcd. for  $\text{C}_{29}\text{H}_{23}\text{FO}_2\text{N}$ :436.1711, found: 436.1711.

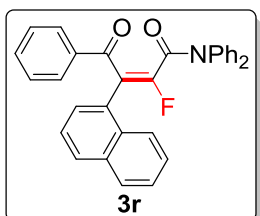

The product **3r** is purified with gel chromatography (petroleum ether/ethyl acetate = 10/1 as the eluent) as a white solid (55% yield).  $^1\text{H}$  NMR (400 MHz, Chloroform-*d*)  $\delta$  7.80 – 7.68 (m, 5H), 7.53 – 7.38 (m, 4H), 7.38 – 7.26 (m, 9H), 7.24 – 7.10 (m, 4H).  $^{13}\text{C}$  NMR (101 MHz, Chloroform-*d*)  $\delta$  192.80 (d,  $J$  = 8.2 Hz), 161.89 (d,  $J$  = 29.7 Hz), 154.21 (d,  $J$  = 284.0 Hz), 141.73, 136.56 (d,  $J$  = 3.8 Hz), 133.89, 133.21, 130.87, 129.68, 129.55, 129.29, 128.73, 128.51, 128.38, 127.52 (d,  $J$  = 1.7 Hz), 126.86, 126.23, 126.19, 126.09, 125.38 (d,  $J$  = 1.8 Hz), 125.25.  $^{19}\text{F}$  NMR (376 MHz, Chloroform-*d*)  $\delta$  -100.88. HRMS (ESI) ( $m/z$ ):  $[\text{M}+\text{H}]^+$  calcd. for  $\text{C}_{32}\text{H}_{23}\text{FO}_2\text{N}$ :472.1707, found: 472.1711.

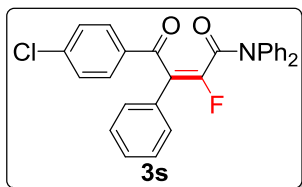

The product **3s** is purified with silica gel chromatography (petroleum ether/ethyl acetate = 10/1 as the eluent) as a white solid (66% yield).  $^1\text{H}$  NMR (400 MHz, Chloroform-*d*)  $\delta$  7.76 (d,  $J$  = 8.5 Hz, 2H), 7.39 – 7.19 (m, 17H).  $^{13}\text{C}$  NMR (101 MHz, Chloroform-*d*)  $\delta$  191.44 (d,  $J$  = 7.0 Hz), 162.08 (d,  $J$  = 28.3 Hz), 151.07 (d,  $J$  = 287.9 Hz), 141.89, 139.79, 134.85, 131.25, 130.73, 129.45, 129.36, 129.01, 128.99, 128.80, 128.75, 128.70, 128.64, 127.48, 126.79.  $^{19}\text{F}$  NMR (376 MHz, Chloroform-*d*)  $\delta$  -112.88. HRMS (ESI) ( $m/z$ ):  $[\text{M}+\text{H}]^+$  calcd. for  $\text{C}_{28}\text{H}_{20}\text{FCIO}_2\text{N}$ : 456.1161, found: 456.1166.

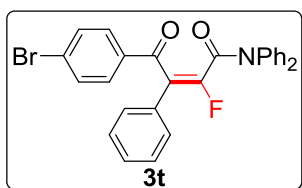

The product **3t** is purified with silica gel chromatography (petroleum ether/ethyl acetate = 10/1 as the eluent) as a white solid (80% yield).  $^1\text{H}$  NMR (400 MHz, Chloroform-*d*)  $\delta$  7.61 (d,  $J = 8.5$  Hz, 2H), 7.41 (d,  $J = 8.5$  Hz, 2H), 7.31 – 7.08 (m, 15H).  $^{13}\text{C}$  NMR (101 MHz, Chloroform-*d*)  $\delta$  191.63 (d,  $J = 7.0$  Hz), 162.06 (d,  $J = 28.3$  Hz), 151.08 (d,  $J = 287.9$  Hz), 141.88, 135.24 (d,  $J = 4.0$  Hz), 131.97, 131.33, 130.70, 129.45, 129.37, 129.01, 128.80, 128.75, 128.66, 128.61, 128.60, 127.42, 126.76.  $^{19}\text{F}$  NMR (376 MHz, Chloroform-*d*)  $\delta$  -112.79. HRMS (ESI) ( $m/z$ ):  $[\text{M}+\text{Na}]^+$  calcd. for  $\text{C}_{28}\text{H}_{19}\text{BrO}_2\text{NFNa}$ : 522.0475, found: 522.0481.

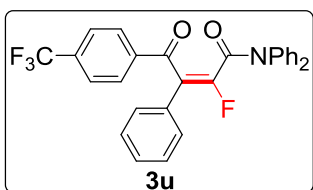

The product **3u** is purified with silica gel chromatography (petroleum ether/ethyl acetate = 10/1 as the eluent) as a white solid (44% yield).  $^1\text{H}$  NMR (400 MHz, Chloroform-*d*)  $\delta$  7.95 (d,  $J = 8.0$  Hz, 2H), 7.60 (d,  $J = 8.2$  Hz, 2H), 7.46 – 7.07 (m, 15H).  $^{13}\text{C}$  NMR (101 MHz, Chloroform-*d*)  $\delta$  191.50 (d,  $J = 7.0$  Hz), 162.02 (d,  $J = 28.1$  Hz), 151.17 (d,  $J = 288.9$  Hz), 141.84, 139.13, 134.39 (q,  $J = 32.6$  Hz), 130.39, 130.09, 129.52, 129.10, 128.79, 128.74, 128.67, 127.15 (d,  $J = 77.8$  Hz), 125.70 (q,  $J = 3.7$  Hz), 124.99.  $^{19}\text{F}$  NMR (376 MHz, Chloroform-*d*)  $\delta$  -63.16, -112.38. HRMS (ESI) ( $m/z$ ):  $[\text{M}+\text{H}]^+$  calcd. for  $\text{C}_{29}\text{H}_{20}\text{F}_4\text{O}_2\text{N}$ : 490.1425, found: 490.1433.

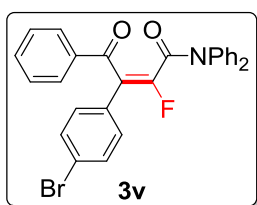

The product **3v** is purified with silica gel chromatography (petroleum ether/ethyl acetate = 10/1 as the eluent) as a white solid (67% yield).  $^1\text{H}$  NMR (400 MHz, Chloroform-*d*)  $\delta$  7.81 (d,  $J = 7.5$  Hz, 2H), 7.55 – 7.10 (m, 17H).  $^{13}\text{C}$  NMR (101 MHz, Chloroform-*d*)  $\delta$  192.25 (d,  $J = 6.7$  Hz), 161.86 (d,  $J = 28.5$  Hz), 151.38 (d,  $J = 288.0$  Hz), 141.83, 136.23, 136.19, 133.60, 132.16, 130.37, 130.32, 129.95, 129.92, 129.43, 128.72, 127.74, 127.69, 127.52, 126.75.  $^{19}\text{F}$  NMR (376 MHz, Chloroform-*d*)  $\delta$  -111.84. HRMS (ESI) ( $m/z$ ):  $[\text{M}+\text{H}]^+$  calcd. for  $\text{C}_{28}\text{H}_{20}\text{FBrO}_2\text{N}$ : 500.0656, found: 500.0663.

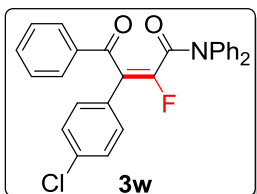

The product **3w** is purified with silica gel chromatography (petroleum ether/ethyl acetate = 10/1 as the eluent) as a white solid (88% yield).  $^1\text{H}$  NMR (400 MHz, Chloroform-*d*)  $\delta$  7.81 (d,  $J = 7.3$  Hz, 2H), 7.49 (t,  $J = 7.4$  Hz, 1H), 7.40 – 7.14 (m, 16H).  $^{13}\text{C}$  NMR (101 MHz, Chloroform-*d*)  $\delta$  192.33 (d,  $J = 6.8$  Hz), 161.88 (d,  $J = 28.5$  Hz), 151.38 (d,  $J = 287.7$  Hz), 141.86, 136.26, 136.22, 135.27, 133.60, 130.17, 130.11, 129.93, 129.50, 129.44, 129.22, 128.73, 127.72, 127.66, 127.46, 126.81.  $^{19}\text{F}$  NMR (376 MHz, Chloroform-*d*)  $\delta$  -112.10. HRMS (ESI) ( $m/z$ ):  $[\text{M}+\text{H}]^+$  calcd. for  $\text{C}_{28}\text{H}_{20}\text{FClO}_2\text{N}$ : 456.1161, found: 456.1169.

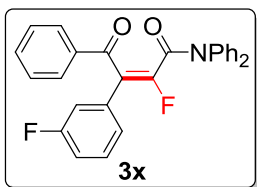

The product **3x** is purified with silica gel chromatography (petroleum ether/ethyl acetate = 10/1 as the eluent) as a white solid (62% yield).  $^1\text{H}$  NMR (400 MHz, Chloroform-*d*)  $\delta$  7.82 (d,  $J = 7.6$  Hz, 2H), 7.57 – 6.88 (m, 17H).  $^{13}\text{C}$  NMR (101 MHz, Chloroform-*d*)  $\delta$  192.13 (d,  $J = 6.7$  Hz), 163.94, 161.93, 161.65, 161.48, 151.63 (d,  $J = 288.6$  Hz), 141.80, 136.22 (d,  $J = 3.8$  Hz), 133.61, 132.90 (d,  $J = 8.2$  Hz), 130.42 (d,  $J = 8.4$  Hz), 129.91, 129.44, 128.71, 127.69 – 127.52 (m), 127.38, 126.83, 124.79 – 124.42 (m), 116.23 (d,  $J = 21.1$  Hz), 115.98 (d,  $J = 5.8$  Hz), 115.75 (d,  $J = 5.9$  Hz).  $^{19}\text{F}$  NMR (376 MHz, Chloroform-*d*)  $\delta$  -111.31, -111.62. HRMS (ESI) ( $m/z$ ):  $[\text{M}+\text{H}]^+$  calcd. for  $\text{C}_{28}\text{H}_{20}\text{F}_2\text{O}_2\text{N}$ : 440.1457, found: 440.1467.

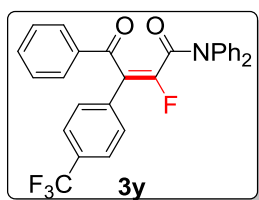

The product **3y** is purified with silica gel chromatography (petroleum ether/ethyl acetate = 10/1 as the eluent) as a white solid (72% yield). <sup>1</sup>H NMR (400 MHz, Chloroform-*d*) δ 7.82 (d, *J* = 7.9 Hz, 2H), 7.61 – 7.12 (m, 17H). <sup>13</sup>C NMR (101 MHz, Chloroform-*d*) δ 192.00 (d, *J* = 6.7 Hz), 161.59 (d, *J* = 28.5 Hz), 152.24 (d, *J* = 289.5 Hz), 141.68, 136.10 (d, *J* = 3.8 Hz), 134.61, 133.73, 130.86 (q, *J* = 32.7 Hz), 129.92, 129.45, 129.13, 129.08, 128.77, 127.83, 127.66, 127.20 (d, *J* = 5.7 Hz), 126.59, 125.82 (q, *J* = 3.7 Hz), 125.13. <sup>19</sup>F NMR (376 MHz, Chloroform-*d*) δ -62.94, -110.36. HRMS (ESI) (*m/z*): [M+H]<sup>+</sup> calcd. for C<sub>29</sub>H<sub>20</sub>F<sub>4</sub>O<sub>2</sub>N: 490.1425, found: 490.1430.

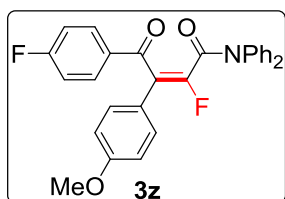

The product **3z** is purified with silica gel chromatography (petroleum ether/ethyl acetate = 10/1 as the eluent) as a white solid (65% yield). <sup>1</sup>H NMR (400 MHz, Chloroform-*d*) δ 7.79 (dd, *J* = 8.7, 5.5 Hz, 2H), 7.19 (m, 12H), 6.92 (t, *J* = 8.6 Hz, 2H), 6.71 (d, *J* = 8.9 Hz, 2H), 3.64 (s, 3H). <sup>13</sup>C NMR (101 MHz, Chloroform-*d*) δ 191.32 (d, *J* = 7.0 Hz), 167.00, 164.46, 162.30 (d, *J* = 28.3 Hz), 160.23, 149.78 (d, *J* = 285.3 Hz), 142.04, 133.08 – 132.95 (m), 132.52, 132.43, 130.32 (d, *J* = 5.8 Hz), 129.36, 128.78 (d, *J* = 6.0 Hz), 127.29, 126.70, 123.10, 115.88, 115.67, 114.41, 55.31. <sup>19</sup>F NMR (376 MHz, Chloroform-*d*) δ -104.59, -115.54. HRMS (ESI) (*m/z*): [M+Na]<sup>+</sup> calcd. for C<sub>29</sub>H<sub>21</sub>F<sub>2</sub>O<sub>3</sub>NNa: 492.1382, found: 492.1387.

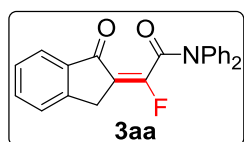

The product **3aa** is purified with silica gel chromatography (petroleum ether/ethyl acetate = 10/1 as the eluent) as a white solid (36% yield). <sup>1</sup>H NMR (400 MHz, Chloroform-*d*) δ 7.77 (d, *J* = 7.6 Hz, 1H), 7.64 – 7.49 (m, 3H), 7.47 – 7.33 (m, 4H), 7.34 – 7.17 (m, 6H), 3.56 (d, *J* = 1.7 Hz, 2H). <sup>13</sup>C NMR (101 MHz, Chloroform-*d*) δ 191.64 (d, *J* = 15.4 Hz), 160.93 (d, *J* = 29.8 Hz), 156.34 (d, *J* = 284.9 Hz), 148.24, 141.53, 141.25, 138.17 (d, *J* = 4.5 Hz), 129.36, 129.31, 128.45, 127.97, 127.53, 127.35, 126.62, 126.39, 124.20, 117.41 (d, *J* = 11.3 Hz), 28.33 (d, *J* = 1.7 Hz). <sup>19</sup>F NMR (376 MHz, Chloroform-*d*) δ -95.76. HRMS (ESI) (*m/z*): [M+Na]<sup>+</sup> calcd. for C<sub>23</sub>H<sub>16</sub>FO<sub>2</sub>NNa: 380.1063, found: 380.1044.

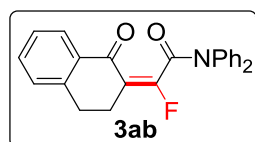

The product **3ab** is purified with silica gel chromatography (petroleum ether/ethyl acetate = 10/1 as the eluent) as a white solid (46% yield). <sup>1</sup>H NMR (400 MHz, Chloroform-*d*) δ 8.03 (d, *J* = 7.8 Hz, 1H), 7.54 (d, *J* = 8.0 Hz, 2H), 7.42 (dt, *J* = 14.9, 7.6 Hz, 3H), 7.31 (t, *J* = 7.6 Hz, 1H), 7.25 (t, *J* = 7.4 Hz, 1H), 7.22 – 7.10 (m, 6H), 2.66 – 2.53 (m, 4H). <sup>13</sup>C NMR (101 MHz, Chloroform-*d*) δ 186.15 (d, *J* = 13.7 Hz), 161.97 (d, *J* = 30.4 Hz), 156.48 (d, *J* = 277.8 Hz), 143.26, 141.58 (d, *J* = 43.8 Hz), 133.72, 132.88 (d, *J* = 4.6 Hz), 129.21, 129.10, 128.40, 128.11, 127.80, 127.71, 127.14, 126.92, 126.37, 118.21 (d, *J* = 13.2 Hz), 28.10 (d, *J* = 1.7 Hz), 22.82 (d, *J* = 5.6 Hz). <sup>19</sup>F NMR (376 MHz, Chloroform-*d*) δ -99.64. HRMS (ESI) (*m/z*): [M+Na]<sup>+</sup> calcd. for C<sub>24</sub>H<sub>18</sub>O<sub>2</sub>NFNa: 394.1214, found: 394.1219.

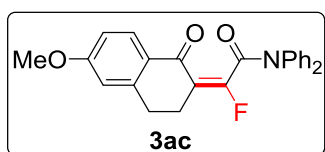

The product **3ac** is purified with silica gel chromatography (petroleum ether/ethyl acetate = 10/1 as the eluent) as a white solid (50% yield). <sup>1</sup>H NMR (400 MHz, Chloroform-*d*) δ 8.01 (d, *J* = 8.8 Hz, 1H), 7.53 (d, *J* = 7.9 Hz, 2H), 7.39 (t, *J* = 7.8 Hz, 2H), 7.31 – 7.11 (m, 6H), 6.82 (dd, *J* = 8.8, 2.2 Hz, 1H), 6.57 (d, *J* = 1.8 Hz, 1H), 3.83 (s, 3H), 2.56 (dd, *J* = 17.8, 5.9 Hz, 4H). <sup>13</sup>C NMR (101 MHz, Chloroform-*d*) δ 184.86 (d, *J* = 13.5 Hz), 163.87, 162.12 (d, *J* = 30.5 Hz), 156.01 (d, *J* = 276.2 Hz), 145.78, 141.88, 141.44, 130.23, 129.17, 129.04, 128.02, 127.85, 126.83, 126.48 (d, *J* = 4.9 Hz), 126.37, 118.29 (d, *J* =



12.9 Hz), 113.43, 112.52, 55.59, 28.54, 22.91 (d,  $J = 5.7$  Hz).  $^{19}\text{F}$  NMR (376 MHz, Chloroform-*d*)  $\delta$  -101.15. HRMS (ESI) ( $m/z$ ):  $[\text{M}+\text{Na}]^+$  calcd. for  $\text{C}_{25}\text{H}_{20}\text{FO}_3\text{NNa}$ : 424.1319, found: 424.1306.

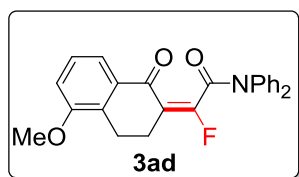

The product **3ad** is purified with silica gel chromatography (petroleum ether/ethyl acetate = 10/1 as the eluent) as a white solid (47% yield).  $^1\text{H}$  NMR (400 MHz, Chloroform-*d*)  $\delta$  7.70 – 7.62 (m, 1H), 7.58 – 7.46 (m, 2H), 7.44 – 7.34 (m, 2H), 7.31 – 7.09 (m, 7H), 7.02 – 6.95 (m, 1H), 3.81 (s, 3H), 2.76 – 2.38 (m, 4H).  $^{13}\text{C}$  NMR (101 MHz, Chloroform-*d*)  $\delta$  186.36 (d,  $J = 13.7$  Hz), 162.04 (d,  $J = 30.5$  Hz), 157.57, 156.36, 154.82, 141.79, 141.39, 133.87 (d,  $J = 4.5$  Hz), 132.41, 129.20, 129.07, 128.07, 127.77, 127.25, 126.90, 126.39, 119.35, 118.28, 118.14, 114.72, 55.86, 22.17, 20.90.  $^{19}\text{F}$  NMR (376 MHz, Chloroform-*d*)  $\delta$  -100.51. HRMS (ESI) ( $m/z$ ):  $[\text{M}+\text{Na}]^+$  calcd. for  $\text{C}_{25}\text{H}_{21}\text{FO}_3\text{NNa}$ : 402.1505, found: 402.1508.

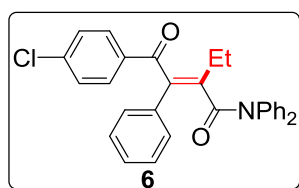

The product **6** is purified with silica gel chromatography (petroleum ether/ethyl acetate = 6/1 as the eluent) as a white solid (51% yield, E/Z>20:1).  $^1\text{H}$  NMR (400 MHz, Chloroform-*d*)  $\delta$  7.44 (d,  $J = 8.3$  Hz, 2H), 7.38 – 7.11 (m, 15H), 6.60 (d,  $J = 7.6$  Hz, 2H), 2.58 – 2.07 (m, 2H), 1.24 (t,  $J = 7.5$  Hz, 3H).  $^{13}\text{C}$  NMR (101 MHz, Chloroform-*d*)  $\delta$  195.24, 169.48, 142.29, 141.89, 140.27, 138.78, 138.55, 135.68, 134.88, 131.22, 129.20, 129.10, 129.02, 128.85, 128.62, 128.32, 127.62, 126.60, 126.38, 27.21, 13.90. HRMS (ESI) ( $m/z$ ):  $[\text{M}+\text{H}]^+$  calcd. for  $\text{C}_{30}\text{H}_{25}\text{ClNO}_2$ : 446.1574, found: 446.1571.

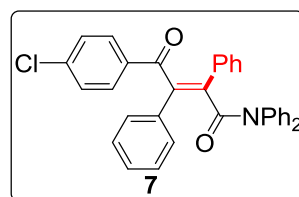

The product **7** is purified with silica gel chromatography (petroleum ether/ethyl acetate = 6/1 as the eluent) as a yellow liquid (56% yield, E/Z>20:1).  $^1\text{H}$  NMR (400 MHz, Chloroform-*d*)  $\delta$  7.69 – 7.59 (m, 4H), 7.47 – 7.26 (m, 8H), 7.22 – 7.12 (m, 8H), 7.08 (dd,  $J = 4.9, 2.8$  Hz, 2H), 6.53 – 6.46 (m, 2H).  $^{13}\text{C}$  NMR (101 MHz, Chloroform-*d*)  $\delta$  195.33, 168.16, 142.07, 141.23, 139.81, 139.11, 137.95, 135.54, 134.93, 134.14, 130.89, 129.23, 129.19, 129.07, 128.98, 128.81, 128.59, 128.54, 128.29, 128.03, 126.63, 126.27. HRMS (ESI) ( $m/z$ ):  $[\text{M}+\text{H}]^+$  calcd. for  $\text{C}_{34}\text{H}_{25}\text{ClNO}_2$ : 514.1568, found: 514.1564.

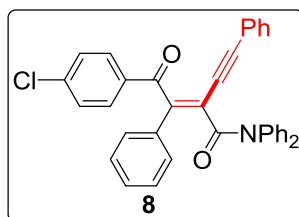

The product **8** is purified with silica gel chromatography (petroleum ether/ethyl acetate = 6/1 as the eluent) as a yellow liquid (62% yield, E/Z>20:1).  $^1\text{H}$  NMR (400 MHz, Chloroform-*d*)  $\delta$  7.77 (d,  $J = 8.5$  Hz, 2H), 7.57 (d,  $J = 6.5$  Hz, 4H), 7.41 – 7.13 (m, 18H).  $^{13}\text{C}$  NMR (101 MHz, Chloroform-*d*)  $\delta$  195.42, 166.69, 150.93, 142.69, 139.56, 135.03, 134.50, 131.54, 131.53, 129.60, 129.19, 129.06, 128.85, 128.66, 128.64, 128.39, 128.02, 126.84, 123.76, 122.44, 99.36, 84.83. HRMS (ESI) ( $m/z$ ):  $[\text{M}+\text{H}]^+$  calcd. for  $\text{C}_{36}\text{H}_{25}\text{ClNO}_2$ : 538.1568, found: 538.1565.

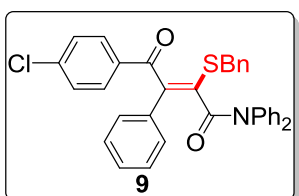

The product **9** is purified with silica gel chromatography (petroleum ether/ethyl acetate = 6/1 as the eluent) as a yellow liquid (71% yield, Z/E>20:1).  $^1\text{H}$  NMR (400 MHz, Chloroform-*d*)  $\delta$  7.44 – 7.07 (m, 22H), 6.96 – 6.87 (m, 2H), 4.13 (s, 2H).  $^{13}\text{C}$  NMR (101 MHz, Chloroform-*d*)  $\delta$  192.00, 165.49, 144.33, 142.62, 142.22, 138.67, 138.45, 136.47, 135.83, 135.47, 131.24, 129.73, 129.41, 129.16, 129.14, 128.85, 128.64, 128.56, 128.18, 127.84, 127.66, 127.60, 127.02, 126.84, 37.64. HRMS (ESI) ( $m/z$ ):  $[\text{M}+\text{Na}]^+$  calcd. for  $\text{C}_{35}\text{H}_{26}\text{ClNO}_2\text{SNa}$ : 582.1265, found: 582.1263.

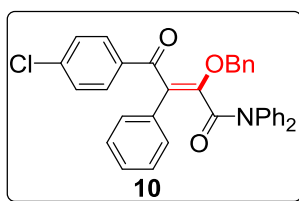

The product **10** is purified with silica gel chromatography (petroleum ether/ethyl acetate = 6/1 as the eluent) as a yellow liquid (53% yield, *Z/E*>20:1). <sup>1</sup>H NMR (400 MHz, Chloroform-*d*) δ 7.63 – 7.04 (m, 22H), 7.03 – 6.91 (m, 2H), 5.08 (s, 2H). <sup>13</sup>C NMR (101 MHz, Chloroform-*d*) δ 193.88, 164.83, 154.38, 142.31, 142.04, 138.34, 136.16, 135.73, 133.84, 131.25, 129.59, 129.30 (d, *J* = 7.4 Hz), 128.63, 128.57, 128.37, 128.33, 128.19, 127.87, 127.59, 127.23, 126.92, 126.71 (d, *J* = 4.0 Hz), 125.67, 73.35. HRMS (ESI) (*m/z*): [*M*+Na]<sup>+</sup> calcd. for C<sub>35</sub>H<sub>27</sub>ClNO<sub>3</sub>Na: 544.1679, found: 544.1669.

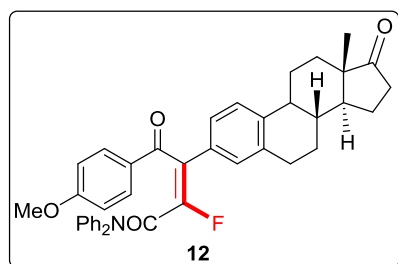

The product **12** is purified with silica gel chromatography (petroleum ether/ethyl acetate = 6/1 as the eluent) as a white solid (51% yield, *E/Z*>20:1). <sup>1</sup>H NMR (400 MHz, Chloroform-*d*) δ 7.79 (d, *J* = 8.4 Hz, 2H), 7.36 – 6.96 (m, 13H), 6.78 (d, *J* = 8.2 Hz, 2H), 3.73 (s, 3H), 2.73 (d, *J* = 4.9 Hz, 2H), 2.41 (dd, *J* = 18.9, 8.7 Hz, 1H), 2.32 – 1.80 (m, 6H), 1.60 – 1.25 (m, 6H), 0.79 (s, 3H). <sup>13</sup>C NMR (101 MHz, Chloroform-*d*) δ 191.39 (d, *J* = 6.9 Hz), 163.76, 162.38 (d, *J* = 28.8 Hz), 150.04 (d, *J* = 285.3 Hz), 142.12, 141.06, 137.09, 132.32, 129.77 (d, *J* = 3.8 Hz), 129.35, 129.24, 129.17, 129.12, 128.79, 127.66 – 126.61 (m), 126.27 (d, *J* = 5.4 Hz), 125.84, 113.96, 55.58, 50.60, 48.03, 44.53, 37.96, 35.94, 31.64, 29.40, 26.42, 25.58, 21.67, 13.92. <sup>19</sup>F NMR (376 MHz, Chloroform-*d*) δ -115.32. HRMS (ESI) (*m/z*): [*M*+H]<sup>+</sup> calcd. for C<sub>41</sub>H<sub>39</sub>NO<sub>4</sub>F: 628.2858, found: 628.2861.

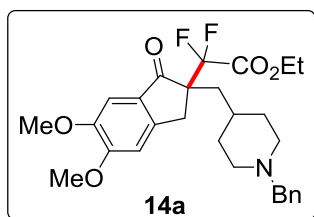

The product **14a** is purified with silica gel chromatography (petroleum ether/ethyl acetate = 1/1 as the eluent) as a white solid (80% yield). <sup>1</sup>H NMR (400 MHz, Chloroform-*d*) δ 7.34 – 7.18 (m, 5H), 7.15 (s, 1H), 6.86 (s, 1H), 4.19 (q, *J* = 7.1 Hz, 2H), 3.98 (s, 3H), 3.90 (s, 3H), 3.53 – 3.34 (m, 3H), 3.04 (d, *J* = 17.8 Hz, 1H), 2.72 (dd, *J* = 23.2, 11.3 Hz, 2H), 2.08 (dt, *J* = 17.6, 8.8 Hz, 1H), 1.94 – 1.67 (m, 4H), 1.50 (d, *J* = 12.5 Hz, 1H), 1.37 (t, *J* = 11.1 Hz, 2H), 1.28 – 1.15 (m, 4H). <sup>13</sup>C NMR (101 MHz, Chloroform-*d*) δ 200.72 (t, *J* = 2.7 Hz), 162.98 (t, *J* = 32.8 Hz), 156.15, 149.89, 147.76, 138.35, 129.31, 128.22, 127.03, 116.22 (t, *J* = 259.2 Hz), 107.12, 104.61, 63.39, 63.12, 57.75 (t, *J* = 20.5 Hz), 56.44, 56.24, 53.68, 53.60, 37.34, 34.11, 33.60 (t, *J* = 3.2 Hz), 33.50, 32.22, 13.88. <sup>19</sup>F NMR (376 MHz, Chloroform-*d*) δ -109.11 (d, *J* = 257.5 Hz, 1F), -110.24 (d, *J* = 257.4 Hz, 1F). HRMS (ESI) (*m/z*): [*M*+H]<sup>+</sup> calcd. for C<sub>28</sub>H<sub>34</sub>F<sub>2</sub>NO<sub>5</sub>: 502.2400, found: 502.2419.

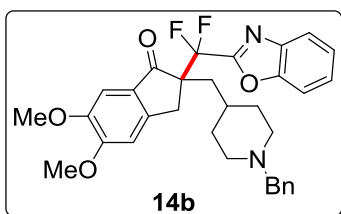

The product **14b** is purified with silica gel chromatography (petroleum ether/ethyl acetate = 1/1 as the eluent) as a white solid (83% yield). <sup>1</sup>H NMR (400 MHz, Chloroform-*d*) δ 7.68 (d, *J* = 7.7 Hz, 1H), 7.49 (d, *J* = 7.9 Hz, 1H), 7.31 (dt, *J* = 15.8, 7.4 Hz, 2H), 7.16 (m, 5H), 7.06 (s, 1H), 6.77 (s, 1H), 3.87 (s, 3H), 3.80 (s, 3H), 3.60 (d, *J* = 17.7 Hz, 1H), 3.31 (s, 2H), 3.08 (d, *J* = 17.8 Hz, 1H), 2.64 (dd, *J* = 27.6, 11.7 Hz, 2H), 2.19 (dd, *J* = 14.1, 6.3 Hz, 1H), 1.93 (dd, *J* = 14.2, 3.4 Hz, 1H), 1.69 (dt, *J* = 43.1, 12.0 Hz, 2H), 1.43 (d, *J* = 12.4 Hz, 1H), 1.38 – 1.06 (m, 4H). <sup>13</sup>C NMR (101 MHz, Chloroform-*d*) δ 200.50, 156.80 (t, *J* = 34.1 Hz), 156.12, 150.42, 149.79, 147.87, 140.01, 138.30, 129.46, 129.26, 128.19, 127.01, 126.77, 125.26, 121.32, 117.44 (t, *J* = 251.5 Hz), 111.43, 107.08, 104.67, 63.30, 58.86 (t, *J* = 21.5 Hz), 56.37, 56.17, 53.64, 53.56, 37.56, 34.00, 33.95, 33.44, 32.24; <sup>19</sup>F NMR (376 MHz, Chloroform-*d*) δ -101.79 (d, *J* = 272.1 Hz, 1F), -105.06 (d, *J* =

272.2 Hz, 1F). HRMS (ESI) ( $m/z$ ):  $[M+H]^+$  calcd. for  $C_{32}H_{33}F_2N_2O_4$ : 547.2408, found: 547.2411.

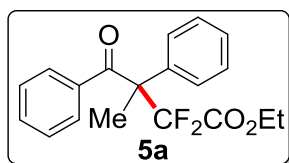

The product **5a** is purified with silica gel chromatography (petroleum ether/ethyl acetate = 10/1 as the eluent) as a yellow oil (95% yield).  $^1H$  NMR (400 MHz, Chloroform-*d*)  $\delta$  7.48 (d,  $J$  = 8.0 Hz, 2H), 7.44 – 7.38 (m, 6H), 7.29 – 7.20 (m, 2H), 4.41 – 4.29 (m, 2H), 2.12 (s, 3H), 1.36 (t,  $J$  = 7.1 Hz, 3H).  $^{13}C$  NMR (101 MHz, Chloroform-*d*)  $\delta$  199.36 (d,  $J$  = 4.6 Hz), 163.98 (t,  $J$  = 32.3 Hz), 136.00, 134.55, 132.95, 130.24, 129.43, 128.69, 128.44, 128.28, 114.66 (dd,  $J$  = 262.6, 252.8 Hz), 62.72, 61.90 (dd,  $J$  = 22.8, 20.0 Hz), 20.45 (dd,  $J$  = 5.9, 3.3 Hz), 13.96.  $^{19}F$  NMR (376 MHz, Chloroform-*d*)  $\delta$  -106.64 (d,  $J$  = 270.4 Hz, 1F), -111.89 (d,  $J$  = 270.5 Hz, 1F). HRMS (ESI) ( $m/z$ ):  $[M+H]^+$  calcd. for  $C_{19}H_{19}O_3F_2$ : 333.1297, found: 333.1294.

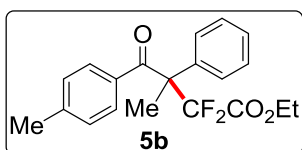

The product **5b** is purified with silica gel chromatography (petroleum ether/ethyl acetate = 10/1 as the eluent) as a yellow oil (68% yield).  $^1H$  NMR (400 MHz, Chloroform-*d*)  $\delta$  7.41 – 7.35 (m, 7H), 7.05 (d,  $J$  = 8.1 Hz, 2H), 4.41 – 4.30 (m, 2H), 2.31 (s, 3H), 2.13 (s, 3H), 1.37 (t,  $J$  = 7.1 Hz, 3H).  $^{13}C$  NMR (101 MHz, Chloroform-*d*)  $\delta$  198.94 (d,  $J$  = 4.6 Hz), 164.06 (t,  $J$  = 32.3 Hz), 143.89, 136.33, 131.84, 130.48, 129.51, 128.98, 128.59, 128.36, 114.72 (dd,  $J$  = 262.5, 252.5 Hz), 62.67, 61.95 (dd,  $J$  = 22.9, 19.9 Hz), 21.65, 20.58 (dd,  $J$  = 6.0, 3.3 Hz), 13.97.  $^{19}F$  NMR (376 MHz, Chloroform-*d*)  $\delta$  -106.79 (d,  $J$  = 270.0 Hz, 1F), -112.07 (d,  $J$  = 270.0 Hz, 1F). HRMS (ESI) ( $m/z$ ):  $[M+H]^+$  calcd. for  $C_{20}H_{21}O_3F_2$ : 347.1453, found: 347.1455.

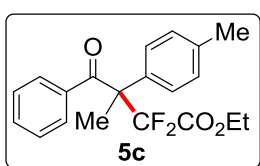

The product **5c** is purified with silica gel chromatography (petroleum ether/ethyl acetate = 10/1 as the eluent) as a yellow oil (63% yield).  $^1H$  NMR (400 MHz, Chloroform-*d*)  $\delta$  7.42 – 7.40 (m, 2H), 7.36 – 7.30 (m, 1H), 7.21 – 7.14 (m, 4H), 7.09 (d,  $J$  = 8.1 Hz, 2H), 4.32 – 4.21 (m, 2H), 2.28 (s, 3H), 2.01 (s, 3H), 1.28 (t,  $J$  = 7.1 Hz, 3H).  $^{13}C$  NMR (101 MHz, Chloroform-*d*)  $\delta$  199.54 (d,  $J$  = 4.4 Hz), 164.05 (t,  $J$  = 32.4 Hz), 138.56, 134.62, 132.88, 130.23, 129.23, 129.18, 128.25, 114.67 (dd,  $J$  = 262.1, 252.5 Hz), 62.68, 61.61 (dd,  $J$  = 22.9, 20.1 Hz), 21.25, 20.40 (dd,  $J$  = 6.0, 3.3 Hz), 13.96.  $^{19}F$  NMR (376 MHz, Chloroform-*d*)  $\delta$  -106.68 (d,  $J$  = 270.2 Hz, 1F), -111.90 (d,  $J$  = 270.2 Hz, 1F). HRMS (ESI) ( $m/z$ ):  $[M+H]^+$  calcd. for  $C_{20}H_{21}O_3F_2$ : 347.1453, found: 347.1458.

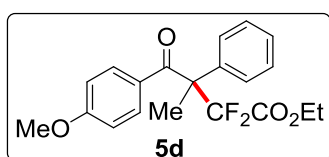

The product **5d** is purified with silica gel chromatography (petroleum ether/ethyl acetate = 10/1 as the eluent) as a yellow oil (85% yield).  $^1H$  NMR (400 MHz, Chloroform-*d*)  $\delta$  7.50 (d,  $J$  = 8.9 Hz, 2H), 7.45 – 7.29 (m, 5H), 6.72 (d,  $J$  = 8.9 Hz, 2H), 4.41 – 4.30 (m, 2H), 3.78 (s, 3H), 2.13 (s, 3H), 1.37 (t,  $J$  = 7.1 Hz, 3H).  $^{13}C$  NMR (101 MHz, Chloroform-*d*)  $\delta$  197.86 (d,  $J$  = 4.8 Hz), 164.12 (t,  $J$  = 32.3 Hz), 163.25, 136.53 (d,  $J$  = 2.1 Hz), 132.82, 129.53, 128.55, 128.31, 126.82, 114.68 (dd,  $J$  = 262.5, 251.9 Hz), 113.48, 62.66, 61.89 (dd,  $J$  = 22.9, 20.0 Hz), 55.52, 20.75 (dd,  $J$  = 6.0, 3.3 Hz), 13.98.  $^{19}F$  NMR (376 MHz, Chloroform-*d*)  $\delta$  -106.96 (d,  $J$  = 269.5 Hz, 1F), -112.27 (d,  $J$  = 269.5 Hz, 1F). HRMS (ESI) ( $m/z$ ):  $[M+H]^+$  calcd. for  $C_{20}H_{21}O_4F_2$ : 363.1402, found: 363.1398.

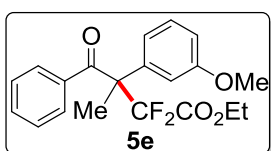

The product **5e** is purified with silica gel chromatography (petroleum ether/ethyl acetate = 10/1 as the eluent) as a yellow oil (66% yield).  $^1H$  NMR (400 MHz, Chloroform-*d*)  $\delta$  7.51 – 7.49 (m, 2H), 7.45 – 7.39 (m, 1H), 7.30 – 7.23 (m, 3H), 6.98 – 6.91 (m, 3H), 4.41 – 4.29 (m, 2H), 3.77 (s, 3H), 2.10 (s, 3H), 1.36 (t,  $J$  =

7.1 Hz, 3H).  $^{13}\text{C}$  NMR (101 MHz, Chloroform-*d*)  $\delta$  199.20 (d,  $J = 4.7$  Hz), 163.94 (t,  $J = 32.3$  Hz), 159.56, 137.39, 134.68, 132.91, 130.17, 129.29, 128.27, 122.10, 115.69, 114.65 (dd,  $J = 263.3, 252.6$  Hz), 113.71, 62.71, 61.83 (dd,  $J = 22.9, 19.8$  Hz), 55.39, 20.47 (dd,  $J = 6.0, 3.3$  Hz), 13.95.  $^{19}\text{F}$  NMR (376 MHz, Chloroform-*d*)  $\delta$  -106.45 (d,  $J = 270.2$  Hz, 1F), -111.73 (d,  $J = 270.2$  Hz, 1F). HRMS (ESI) ( $m/z$ ):  $[\text{M}+\text{H}]^+$  calcd. for  $\text{C}_{20}\text{H}_{21}\text{O}_4\text{F}_2$ : 363.1402, found: 363.1402.

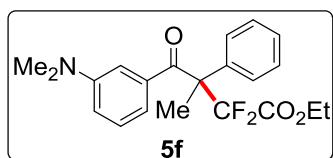

The product **5f** is purified with silica gel chromatography (petroleum ether/ethyl acetate = 10/1 as the eluent) as a yellow oil (60% yield).  $^1\text{H}$  NMR (400 MHz, Chloroform-*d*)  $\delta$  7.41 – 7.36 (m, 5H), 7.10 – 7.02 (m, 1H), 6.90 (s, 1H), 6.78 – 6.72 (m, 2H), 4.36 (q,  $J = 7.0$  Hz, 2H), 2.79 (s, 6H), 2.13 (s, 3H), 1.37 (t,  $J = 7.1$  Hz, 3H).  $^{13}\text{C}$  NMR (101 MHz, Chloroform-*d*)  $\delta$  200.02 (d,  $J = 4.4$  Hz), 164.07 (t,  $J = 32.3$  Hz), 150.16, 136.53, 135.13, 129.52, 128.76, 128.51, 128.30, 118.40, 116.70, 114.80 (dd,  $J = 262.1, 252.5$  Hz), 114.02, 62.66, 62.10 (dd,  $J = 22.8, 19.9$  Hz), 40.36, 20.53 (dd,  $J = 6.0, 3.4$  Hz), 13.98.  $^{19}\text{F}$  NMR (376 MHz, Chloroform-*d*)  $\delta$  -106.77 (d,  $J = 269.9$  Hz, 1F), -111.85 (d,  $J = 269.9$  Hz, 1F). HRMS (ESI) ( $m/z$ ):  $[\text{M}+\text{H}]^+$  calcd. for  $\text{C}_{21}\text{H}_{24}\text{O}_3\text{NF}_2$ : 376.1719, found: 376.1720.

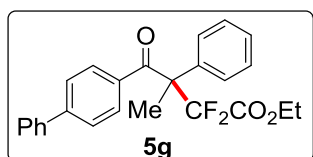

The product **5g** is purified with silica gel chromatography (petroleum ether/ethyl acetate = 10/1 as the eluent) as a yellow oil (61% yield).  $^1\text{H}$  NMR (400 MHz, Chloroform-*d*)  $\delta$  7.61 – 7.57 (m, 2H), 7.55 – 7.53 (m, 2H), 7.51 – 7.47 (m, 2H), 7.45 – 7.35 (m, 8H), 4.44 – 4.32 (m, 2H), 2.19 (s, 3H), 1.39 (t,  $J = 7.1$  Hz, 3H).  $^{13}\text{C}$  NMR (101 MHz, Chloroform-*d*)  $\delta$  198.85 (d,  $J = 4.7$  Hz), 164.02 (t,  $J = 32.3$  Hz), 145.59, 139.67, 136.19, 133.14, 130.93, 129.52, 129.04, 128.70, 128.48, 128.42, 127.28, 126.86, 114.71 (dd,  $J = 262.6, 252.8$  Hz), 62.72, 61.99 (dd,  $J = 22.9, 20.0$  Hz), 20.54 (dd,  $J = 6.0, 3.3$  Hz), 13.98.  $^{19}\text{F}$  NMR (376 MHz, Chloroform-*d*)  $\delta$  -106.64 (d,  $J = 270.3$  Hz, 1F), -111.93 (d,  $J = 270.3$  Hz, 1F). HRMS (ESI) ( $m/z$ ):  $[\text{M}+\text{H}]^+$  calcd. for  $\text{C}_{25}\text{H}_{23}\text{O}_3\text{F}_2$ : 409.1610, found: 409.1607.

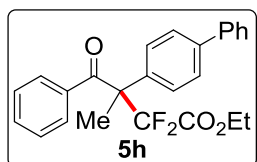

The product **5h** is purified with silica gel chromatography (petroleum ether/ethyl acetate = 10/1 as the eluent) as a yellow oil (63% yield).  $^1\text{H}$  NMR (400 MHz, Chloroform-*d*)  $\delta$  7.64 – 7.51 (m, 4H), 7.49 – 7.44 (m, 2H), 7.41 – 7.35 (m, 5H), 7.32 – 7.27 (m, 1H), 7.21 – 7.17 (m, 2H), 4.35 – 4.23 (m, 2H), 2.08 (s, 3H), 1.30 (t,  $J = 7.1$  Hz, 3H).  $^{13}\text{C}$  NMR (101 MHz, Chloroform-*d*)  $\delta$  199.37 (d,  $J = 4.4$  Hz), 163.99 (t,  $J = 32.3$  Hz), 141.33, 140.17, 134.97, 134.55, 133.02, 130.28, 129.83, 128.96, 128.34, 127.78, 127.18, 127.02, 114.70 (dd,  $J = 262.4, 252.9$  Hz), 62.78, 61.73 (dd,  $J = 22.8, 20.1$  Hz), 20.49 (dd,  $J = 6.0, 3.2$  Hz), 13.99.  $^{19}\text{F}$  NMR (376 MHz, Chloroform-*d*)  $\delta$  -106.57 (d,  $J = 270.4$  Hz, 1F), -111.70 (d,  $J = 270.4$  Hz, 1F). HRMS (ESI) ( $m/z$ ):  $[\text{M}+\text{H}]^+$  calcd. for  $\text{C}_{25}\text{H}_{23}\text{O}_3\text{F}_2$ : 409.1610, found: 409.1606.

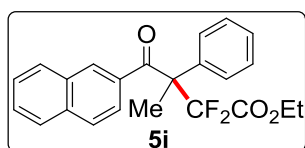

The product **5i** is purified with silica gel chromatography (petroleum ether/ethyl acetate = 10/1 as the eluent) as a yellow oil (64% yield).  $^1\text{H}$  NMR (400 MHz, Chloroform-*d*)  $\delta$  8.05 (s, 1H), 7.78 (d,  $J = 8.1$  Hz, 1H), 7.73 – 7.66 (m, 2H), 7.57 – 7.52 (m, 2H), 7.49 – 7.44 (m, 3H), 7.41 – 7.37 (m, 3H), 4.45 – 4.33 (m, 2H), 2.21 (s, 3H), 1.40 (t,  $J = 7.1$  Hz, 3H).  $^{13}\text{C}$  NMR (101 MHz, Chloroform-*d*)  $\delta$  199.28 (d,  $J = 4.7$  Hz), 164.05 (t,  $J = 32.2$  Hz), 136.26 (d,  $J = 2.0$  Hz), 135.25, 132.43, 132.21, 131.82, 129.82, 129.55, 128.85, 128.73, 128.50, 127.92, 127.67, 126.82, 125.59, 114.76 (dd,  $J = 262.7, 252.7$  Hz), 62.74, 62.12 (dd,  $J = 22.9, 20.0$  Hz), 20.59 (dd,  $J = 5.9, 3.4$  Hz), 14.00.  $^{19}\text{F}$  NMR (376 MHz, Chloroform-*d*)  $\delta$  -106.64 (d,  $J = 270.3$  Hz, 1F), -111.93 (d,  $J = 270.3$  Hz, 1F). HRMS (ESI) ( $m/z$ ):  $[\text{M}+\text{H}]^+$  calcd. for

C<sub>23</sub>H<sub>21</sub>O<sub>3</sub>F<sub>2</sub>: 383.1453, found: 383.1451.

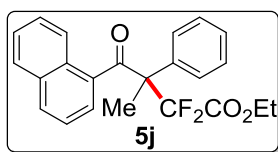

The product **5j** is purified with silica gel chromatography (petroleum ether/ethyl acetate = 10/1 as the eluent) as a yellow oil (71% yield). <sup>1</sup>H NMR (400 MHz, Chloroform-*d*) δ 8.18 (d, *J* = 8.4 Hz, 1H), 7.90 – 7.78 (m, 1H), 7.61 – 7.45 (m, 7H), 7.17 – 7.09 (m, 1H), 6.86 (d, *J* = 7.2 Hz, 1H), 4.46 – 4.32 (m, 2H), 1.94 (s, 3H), 1.37 (t, *J* = 7.0 Hz, 3H). <sup>13</sup>C NMR (101 MHz, Chloroform-*d*) δ 203.35 (d, *J* = 3.5 Hz), 163.89 (t, *J* = 32.4 Hz), 135.26, 135.12, 134.01, 131.57, 130.93, 129.29, 128.89, 128.60, 128.53, 127.83, 126.58, 125.67, 125.48, 123.85, 115.22 (dd, *J* = 263.3, 255.6 Hz), 62.97, 62.52 (dd, *J* = 22.1, 19.2 Hz), 19.21 (dd, *J* = 5.7, 3.5 Hz), 13.97. <sup>19</sup>F NMR (376 MHz, Chloroform-*d*) δ -104.68 (d, *J* = 272.9 Hz, 1F), -108.53 (d, *J* = 272.9 Hz, 1F). HRMS (ESI) (*m/z*): [M+H]<sup>+</sup> calcd. for C<sub>23</sub>H<sub>21</sub>O<sub>3</sub>F<sub>2</sub>: 383.1453, found: 383.1457.

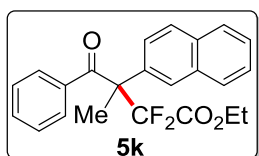

The product **5k** is purified with silica gel chromatography (petroleum ether/ethyl acetate = 10/1 as the eluent) as a yellow oil (62% yield). <sup>1</sup>H NMR (400 MHz, Chloroform-*d*) δ 7.98 (s, 1H), 7.87 – 7.81 (m, 3H), 7.64 – 7.48 (m, 4H), 7.46 – 7.39 (m, 2H), 7.25 – 7.15 (m, 2H), 4.43 – 4.31 (m, 2H), 2.25 (s, 3H), 1.36 (t, *J* = 7.1 Hz, 3H). <sup>13</sup>C NMR (101 MHz, Chloroform-*d*) δ 199.44 (d, *J* = 4.4 Hz), 164.03 (t, *J* = 32.2 Hz), 134.67, 133.62 (d, *J* = 2.1 Hz), 133.15, 133.11, 133.00, 130.24, 128.54, 128.35, 127.89, 127.71, 127.32, 127.30, 126.93, 126.55, 114.85 (dd, *J* = 262.6, 252.8 Hz), 62.77, 62.07 (dd, *J* = 22.8, 20.0 Hz), 20.67 (dd, *J* = 6.0, 3.3 Hz), 13.97. <sup>19</sup>F NMR (376 MHz, Chloroform-*d*) δ -106.33 (d, *J* = 277.2 Hz, 1F), -111.49 (d, *J* = 270.7 Hz, 1F). HRMS (ESI) (*m/z*): [M+H]<sup>+</sup> calcd. for C<sub>23</sub>H<sub>21</sub>O<sub>3</sub>F<sub>2</sub>: 383.1453, found: 383.1453.

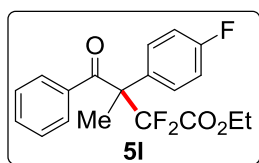

The product **5l** is purified with silica gel chromatography (petroleum ether/ethyl acetate = 10/1 as the eluent) as a yellow oil (63% yield). <sup>1</sup>H NMR (400 MHz, Chloroform-*d*) δ 7.49 – 7.47 (m, 2H), 7.44 (d, *J* = 7.4 Hz, 1H), 7.39 – 7.36 (m, 2H), 7.29 – 7.25 (m, 2H), 7.12 – 7.03 (m, 2H), 4.42 – 4.31 (m, 2H), 2.11 (s, 3H), 1.38 (t, *J* = 7.1 Hz, 3H). <sup>13</sup>C NMR (101 MHz, Chloroform-*d*) δ 199.09 (d, *J* = 4.4 Hz), 163.87 (t, *J* = 32.3), 162.96 (d, *J* = 249.5), 134.38, 133.12, 131.89, 131.24 (dd, *J* = 8.2, 1.3 Hz), 130.22, 128.40, 115.52 (d, *J* = 21.5 Hz), 114.52 (dd, *J* = 262.3, 253.1 Hz), 62.81, 61.44 (dd, *J* = 22.9, 20.1 Hz), 20.64 (dd, *J* = 6.1, 3.2 Hz), 13.99. <sup>19</sup>F NMR (376 MHz, Chloroform-*d*) δ -106.83 (d, *J* = 271.0 Hz, 1F), -112.03 (d, *J* = 271.0 Hz, 1F), -113.10 (s, 1F). HRMS (ESI) (*m/z*): [M+H]<sup>+</sup> calcd. for C<sub>19</sub>H<sub>18</sub>O<sub>3</sub>F<sub>3</sub>: 351.1203, found: 351.1205.

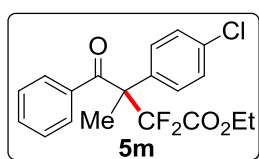

The product **5m** is purified with silica gel chromatography (petroleum ether/ethyl acetate = 10/1 as the eluent) as a yellow oil (60% yield). <sup>1</sup>H NMR (400 MHz, Chloroform-*d*) δ 7.50 – 7.43 (m, 3H), 7.37 – 7.23 (m, 6H), 4.42 – 4.30 (m, 2H), 2.11 (s, 3H), 1.37 (t, *J* = 7.1 Hz, 3H). <sup>13</sup>C NMR (101 MHz, Chloroform-*d*) δ 198.91 (d, *J* = 4.4 Hz), 163.78 (t, *J* = 32.1 Hz), 134.97, 134.68 (d, *J* = 2.1 Hz), 134.23 (d, *J* = 2.1 Hz), 133.19, 130.81, 130.21, 128.69, 128.42, 114.44 (dd, *J* = 262.4, 253.4 Hz), 62.84, 61.54 (dd, *J* = 22.9, 20.0 Hz), 20.51 (dd, *J* = 6.0, 3.2 Hz), 13.97. <sup>19</sup>F NMR (376 MHz, Chloroform-*d*) δ -106.70 (d, *J* = 271.3 Hz, 1F), -111.83 (d, *J* = 271.2 Hz, 1F). HRMS (ESI) (*m/z*): [M+H]<sup>+</sup> calcd. for C<sub>19</sub>H<sub>18</sub>O<sub>3</sub>ClF<sub>2</sub>: 367.0907, found: 367.0907.

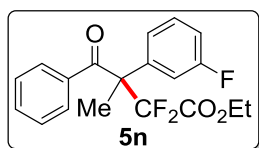

The product **5n** is purified with silica gel chromatography (petroleum ether/ethyl acetate = 10/1 as the eluent) as a yellow oil (60% yield). <sup>1</sup>H NMR (400 MHz, Chloroform-*d*) δ 7.45 – 7.39 (m, 2H), 7.37 (d, *J* = 7.4 Hz, 1H), 7.26 (q, *J* = 7.7 Hz, 1H), 7.23 – 7.17 (m, 2H), 7.08 (d, *J* = 8.4 Hz, 2H), 7.06 – 6.99 (m, 1H), 4.29 (dt,

$J = 10.7, 6.9, 3.6$  Hz, 2H), 2.04 (s, 3H), 1.30 (t,  $J = 7.1$  Hz, 3H).  $^{13}\text{C}$  NMR (101 MHz, Chloroform-*d*)  $\delta$  198.74 (d,  $J = 4.4$  Hz), 163.75 (t,  $J = 32.3$  Hz), 162.75 (d,  $J = 247.4$  Hz), 138.50 (dd,  $J = 7.2, 1.6$  Hz), 134.28, 133.19, 130.19, 129.80 (d,  $J = 8.2$  Hz), 128.42, 125.67 – 125.43 (m), 116.52 (d,  $J = 22.9$  Hz), 115.80 (d,  $J = 20.9$  Hz), 114.45 (dd,  $J = 263.1, 253.3$  Hz), 62.86, 61.72 (dd,  $J = 22.8, 19.7$  Hz), 20.50 (dd,  $J = 6.0, 3.3$  Hz), 13.97.  $^{19}\text{F}$  NMR (376 MHz, Chloroform-*d*)  $\delta$  -106.82 (d,  $J = 270.7$  Hz, 1F), 112.02 (d,  $J = 270.7$  Hz, 1F), -113.09 (s, 1F). HRMS (ESI) ( $m/z$ ):  $[\text{M}+\text{H}]^+$  calcd. for  $\text{C}_{19}\text{H}_{18}\text{O}_3\text{F}_3$ : 351.1203, found: 351.1205.

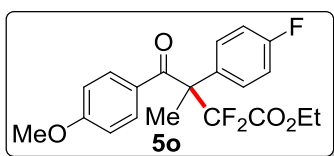

The product **5o** is purified with silica gel chromatography (petroleum ether/ethyl acetate = 10/1 as the eluent) as a yellow oil (70% yield).  $^1\text{H}$  NMR (400 MHz, Chloroform-*d*)  $\delta$  7.50 (d,  $J = 8.8$  Hz, 2H), 7.37 – 7.34 (m, 2H), 7.11 – 7.00 (m, 2H), 6.74 (d,  $J = 8.9$  Hz, 2H), 4.42 – 4.31 (m, 2H), 3.79 (s, 3H), 2.13 (s, 3H), 1.38 (t,  $J = 7.1$  Hz, 3H).  $^{13}\text{C}$  NMR (101 MHz, Chloroform-*d*)  $\delta$  197.55 (d,  $J = 4.8$  Hz), 164.01 (t,  $J = 32.3$  Hz), 163.42, 162.86 (d,  $J = 249.5$  Hz), 132.81, 132.42, 131.32 (d,  $J = 8.0$  Hz), 126.65, 115.48, 115.27, 114.50 (dd,  $J = 212.1, 254.5$  Hz), 113.61, 62.73, 61.43 (dd,  $J = 22.9, 20.0$  Hz), 55.57, 20.94 (dd,  $J = 6.0, 3.2$  Hz), 14.00.  $^{19}\text{F}$  NMR (376 MHz, Chloroform-*d*)  $\delta$  -107.08 (d,  $J = 270.1$  Hz, 1F), -112.37 (d,  $J = 270.0$  Hz, 1F), -113.36 (s, 1F). HRMS (ESI) ( $m/z$ ):  $[\text{M}+\text{H}]^+$  calcd. for  $\text{C}_{20}\text{H}_{20}\text{O}_4\text{F}_3$ : 381.1308, found: 381.1306.

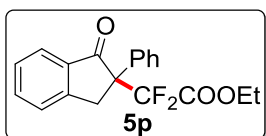

The product **5p** is purified with silica gel chromatography (petroleum ether/ethyl acetate = 10/1 as the eluent) as a yellow oil (95% yield).  $^1\text{H}$  NMR (400 MHz, Chloroform-*d*)  $\delta$  7.84 (d,  $J = 7.6$  Hz, 1H), 7.63 (m, 3H), 7.39 (m, 5H), 4.19 – 4.06 (m, 3H), 3.73 (d,  $J = 16.9$  Hz, 1H), 1.09 (t,  $J = 7.1$  Hz, 3H).  $^{13}\text{C}$  NMR (101 MHz, Chloroform-*d*)  $\delta$  200.32 (t,  $J = 2.4$  Hz), 162.74 (t,  $J = 32.7$  Hz), 151.51, 135.89, 135.79, 134.99, 128.97, 128.52, 128.41, 128.09, 126.26, 124.91, 115.43 (t,  $J = 260.6$  Hz), 63.12, 61.38 (t,  $J = 21.2$  Hz), 38.13 (t,  $J = 3.5$  Hz), 13.66.  $^{19}\text{F}$  NMR (376 MHz, Chloroform-*d*)  $\delta$  -105.43 (d,  $J = 266.9$  Hz, 1F), -107.22 (d,  $J = 263.2$  Hz, 1F). HRMS (ESI) ( $m/z$ ):  $[\text{M}+\text{H}]^+$  calcd. for  $\text{C}_{19}\text{H}_{17}\text{O}_3\text{F}_2$ : 331.1140, found: 331.1144.

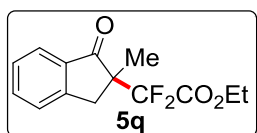

The product **5q** is purified with silica gel chromatography (petroleum ether/ethyl acetate = 10/1 as the eluent) as a yellow oil (83% yield).  $^1\text{H}$  NMR (400 MHz, Chloroform-*d*)  $\delta$  7.78 (d,  $J = 7.6$  Hz, 1H), 7.66 – 7.58 (m, 1H), 7.46 (d,  $J = 7.6$  Hz, 1H), 7.43 – 7.37 (m, 1H), 4.21 (q,  $J = 7.1$  Hz, 2H), 3.59 (d,  $J = 17.6$  Hz, 1H), 2.94 (d,  $J = 17.7$  Hz, 1H), 1.49 (s, 3H), 1.20 (t,  $J = 7.1$  Hz, 3H).  $^{13}\text{C}$  NMR (101 MHz, Chloroform-*d*)  $\delta$  202.57 (t,  $J = 2.7$  Hz), 162.91 (t,  $J = 32.8$  Hz), 151.49, 135.60, 135.34 (t,  $J = 2.1$  Hz), 128.09, 126.60, 124.85, 115.93 (t,  $J = 257.8$  Hz), 63.17, 53.77 (t,  $J = 21.7$  Hz), 37.06, 18.96 (t,  $J = 4.6$  Hz), 13.80.  $^{19}\text{F}$  NMR (376 MHz, Chloroform-*d*)  $\delta$  -109.86 (d,  $J = 264.1$  Hz, 1F), -110.58 (d,  $J = 264.2$  Hz, 1F). HRMS (ESI) ( $m/z$ ):  $[\text{M}+\text{H}]^+$  calcd. for  $\text{C}_{14}\text{H}_{15}\text{O}_3\text{F}_2$ : 269.0984, found: 269.0994.

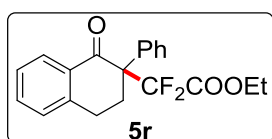

The product **5r** is purified with silica gel chromatography (petroleum ether/ethyl acetate = 10/1 as the eluent) as a yellow oil (90% yield).  $^1\text{H}$  NMR (400 MHz, Chloroform-*d*)  $\delta$  8.16 (d,  $J = 7.9$  Hz, 1H), 7.49 – 7.41 (m, 1H), 7.26 – 7.34 (m, 6H), 7.10 (d,  $J = 7.6$  Hz, 1H), 4.26 (qq,  $J = 10.7, 7.1$  Hz, 2H), 3.01 (td,  $J = 13.5, 4.5$  Hz, 1H), 2.92 – 2.83 (m, 2H), 2.73 – 2.64 (m, 1H), 1.22 (t,  $J = 7.1$  Hz, 3H).  $^{13}\text{C}$  NMR (101 MHz, Chloroform-*d*)  $\delta$  196.07 (t,  $J = 2.9$  Hz), 163.56 (t,  $J = 32.4$  Hz), 143.17, 134.19, 132.29, 131.92, 129.02, 128.74, 128.39, 128.36, 128.16, 127.00, 115.22 (t,  $J = 257.6$  Hz), 62.63, 60.87 (dd,  $J = 22.4, 20.9$  Hz),

28.51 (dd,  $J = 5.8, 3.2$  Hz), 25.27, 13.77.  $^{19}\text{F}$  NMR (376 MHz, Chloroform-*d*)  $\delta$  -107.22 (d,  $J = 272.2$  Hz, 1F), -110.19 (d,  $J = 272.1$  Hz, 1F). HRMS (ESI) ( $m/z$ ):  $[\text{M}+\text{H}]^+$  calcd. for  $\text{C}_{20}\text{H}_{19}\text{O}_3\text{F}_2$ : 345.1297, found: 345.1301.

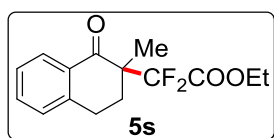

The product **5s** is purified with silica gel chromatography (petroleum ether/ethyl acetate = 10/1 as the eluent) as a yellow oil (72% yield).  $^1\text{H}$  NMR (400 MHz, Chloroform-*d*)  $\delta$  8.01 (d,  $J = 7.7$  Hz, 1H), 7.57 – 7.45 (m, 1H), 7.36 – 7.28 (m, 1H), 7.25 (d,  $J = 8.0$  Hz, 1H), 4.37 (q,  $J = 7.1$  Hz, 2H), 3.14 – 3.01 (m, 2H), 2.64 – 2.56 (m, 1H), 2.11 (dt,  $J = 13.7, 4.5$  Hz, 1H), 1.52 (s, 3H), 1.37 (t,  $J = 7.1$  Hz, 3H).  $^{13}\text{C}$  NMR (101 MHz, Chloroform-*d*)  $\delta$  196.59 (t,  $J = 3.1$  Hz), 163.74 (t,  $J = 32.3$  Hz), 142.87, 134.08, 131.18, 128.81, 128.23, 127.06, 116.41 (t,  $J = 257.2$  Hz), 62.91, 51.93 (t,  $J = 21.9$  Hz), 28.54 (t,  $J = 4.1$  Hz), 24.86, 16.75 (t,  $J = 4.2$  Hz), 13.98.  $^{19}\text{F}$  NMR (376 MHz, Chloroform-*d*)  $\delta$  -111.56 (d,  $J = 266.0$  Hz, 1F), -112.33 (d,  $J = 266.0$  Hz, 1F). HRMS (ESI) ( $m/z$ ):  $[\text{M}+\text{H}]^+$  calcd. for  $\text{C}_{15}\text{H}_{17}\text{O}_3\text{F}_2$ : 283.1140, found: 283.1145.

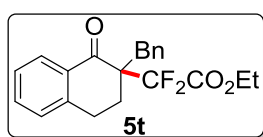

The product **5t** is purified with silica gel chromatography (petroleum ether/ethyl acetate = 10/1 as the eluent) as a yellow oil (61% yield).  $^1\text{H}$  NMR (400 MHz, Chloroform-*d*)  $\delta$  8.04 (d,  $J = 7.8$  Hz, 1H), 7.48 – 7.42 (m, 1H), 7.33 – 7.27 (m, 1H), 7.20 – 7.14 (m, 5H), 7.16 (d,  $J = 5.9$  Hz, 1H), 4.40 – 4.28 (m, 2H), 3.65 (d,  $J = 13.8$  Hz, 1H), 3.12 – 3.04 (m, 1H), 3.04 (d,  $J = 13.8$  Hz, 1H), 2.74 (dt,  $J = 17.1, 6.3$  Hz, 1H), 2.47 – 2.41 (m, 1H), 2.20 – 2.13 (m, 1H), 1.33 (t,  $J = 7.1$  Hz, 3H).  $^{13}\text{C}$  NMR (101 MHz, Chloroform-*d*)  $\delta$  195.35 (t,  $J = 2.7$  Hz), 163.34 (t,  $J = 32.5$  Hz), 143.41, 135.84, 133.98, 132.49, 131.00, 128.71, 128.35, 128.15, 127.01, 126.89, 117.11 (t,  $J = 260.8$  Hz), 63.20, 55.49 (t,  $J = 19.7$  Hz), 37.28 (t,  $J = 4.0$  Hz), 26.20 (t,  $J = 3.2$  Hz), 25.42, 13.97.  $^{19}\text{F}$  NMR (376 MHz, Chloroform-*d*)  $\delta$  -106.66 (d,  $J = 262.6$  Hz, 1F), -107.38 (d,  $J = 262.5$  Hz, 1F). HRMS (ESI) ( $m/z$ ):  $[\text{M}+\text{H}]^+$  calcd. for  $\text{C}_{21}\text{H}_{21}\text{O}_3\text{F}_2$ : 359.1453, found: 359.1451.

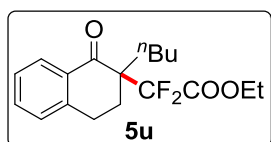

The product **5u** is purified with silica gel chromatography (petroleum ether/ethyl acetate = 10/1 as the eluent) as a yellow oil (74% yield).  $^1\text{H}$  NMR (400 MHz, Chloroform-*d*)  $\delta$  8.02 (d,  $J = 7.8$  Hz, 1H), 7.60 – 7.44 (m, 1H), 7.40 – 7.28 (m, 1H), 7.25 (d,  $J = 7.9$  Hz, 1H), 4.33 (q,  $J = 7.1$  Hz, 2H), 3.08 – 2.97 (m, 2H), 2.63 – 2.55 (m, 1H), 2.35 (dt,  $J = 13.6, 4.7$  Hz, 1H), 1.96 – 1.78 (m, 2H), 1.58 – 1.49 (m, 1H), 1.43 – 1.28 (m, 6H), 0.90 (t,  $J = 7.1$  Hz, 3H).  $^{13}\text{C}$  NMR (101 MHz, Chloroform-*d*)  $\delta$  196.82 (t,  $J = 3.5$  Hz), 163.78 (t,  $J = 32.4$  Hz), 143.09, 134.00, 131.39, 128.82, 128.23, 127.02, 117.02 (dd,  $J = 260.0, 256.6$  Hz), 62.87, 55.10 (t,  $J = 20.5$  Hz), 30.19 (t,  $J = 3.1$  Hz), 26.64, 25.21 (dd,  $J = 5.3, 3.3$  Hz), 25.04, 23.40, 13.97, 13.95.  $^{19}\text{F}$  NMR (376 MHz, Chloroform-*d*)  $\delta$  -106.55 (d,  $J = 269.9$  Hz, 1F), -107.72 (d,  $J = 269.9$  Hz, 1F). HRMS (ESI) ( $m/z$ ):  $[\text{M}+\text{Na}]^+$  calcd. for  $\text{C}_{18}\text{H}_{22}\text{O}_3\text{F}_2\text{Na}$ : 347.1429, found: 347.1434.

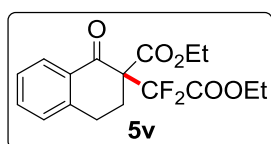

The product **5v** is purified with silica gel chromatography (petroleum ether/ethyl acetate = 10/1 as the eluent) as a yellow oil (61% yield).  $^1\text{H}$  NMR (400 MHz, Chloroform-*d*)  $\delta$  7.99 (d,  $J = 7.7$  Hz, 1H), 7.44 (dd,  $J = 9.4, 5.7$  Hz, 1H), 7.26 (t,  $J = 7.7$  Hz, 1H), 7.22 – 7.12 (m, 1H), 4.34 (q,  $J = 7.2$  Hz, 2H), 4.23 – 4.08 (m, 2H), 3.06 – 2.81 (m, 2H), 2.75 (d,  $J = 13.6$  Hz, 1H), 2.55 (td,  $J = 13.3, 4.3$  Hz, 1H), 1.31 (t,  $J = 6.8$  Hz, 3H), 1.10 (t,  $J = 7.0$  Hz, 3H).  $^{13}\text{C}$  NMR (101 MHz, Chloroform-*d*)  $\delta$  191.01 (t,  $J = 2.1$  Hz), 166.84 (dd,  $J = 3.5, 1.5$  Hz), 163.01 (t,  $J = 31.2$  Hz), 142.54, 134.32, 131.61, 128.81, 128.11, 127.26, 113.84 (t,  $J = 3.7$  Hz), 63.31, 62.94 (t,  $J = 22.2$  Hz), 62.58, 27.18 (t,  $J = 4.2$  Hz), 25.63, 13.94.  $^{19}\text{F}$  NMR (376 MHz, Chloroform-*d*)  $\delta$  -110.92 (d,  $J = 274.5$  Hz, 1F), -111.69 (d,  $J = 274.5$  Hz, 1F). HRMS (ESI) ( $m/z$ ):  $[\text{M}+\text{H}]^+$

calcd. for C<sub>17</sub>H<sub>19</sub>O<sub>5</sub>F<sub>2</sub>: 341.1195, found: 341.1200.

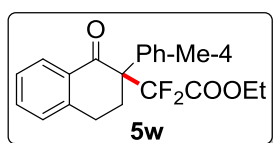

The product **5w** is purified with silica gel chromatography (petroleum ether/ethyl acetate = 10/1 as the eluent) as a yellow oil (85% yield). <sup>1</sup>H NMR (400 MHz, Chloroform-*d*) δ 8.15 (d, *J* = 7.8 Hz, 1H), 7.48 – 7.39 (m, 1H), 7.35 – 7.28 (m, 1H), 7.23 – 7.16 (m, 2H), 7.12 – 7.08 (m, 3H), 4.34 – 4.21 (m, 2H), 2.99 (td, *J* = 13.4, 4.3 Hz, 1H), 2.88 – 2.84 (m, 2H), 2.76 – 2.68 (m, 1H), 2.30 (s, 3H), 1.26 (t, *J* = 7.3 Hz, 3H). <sup>13</sup>C NMR (101 MHz, Chloroform-*d*) δ 196.13 (t, *J* = 3.1 Hz), 163.64 (t, *J* = 32.3 Hz), 143.14, 138.18, 134.08, 131.90, 129.12, 128.89, 128.71, 128.09, 126.92, 115.19 (t, *J* = 258.6 Hz), 62.62, 60.55 (t, *J* = 22.2 Hz), 28.33 (dd, *J* = 5.8, 3.1 Hz), 25.27, 21.09, 13.79. <sup>19</sup>F NMR (376 MHz, Chloroform-*d*) δ -107.13 (d, *J* = 271.8 Hz, 1F), -110.44 (d, *J* = 271.7 Hz, 1F). HRMS (ESI) (*m/z*): [M+H]<sup>+</sup> calcd. for C<sub>21</sub>H<sub>21</sub>O<sub>3</sub>F<sub>2</sub>: 359.1453, found: 359.1459.

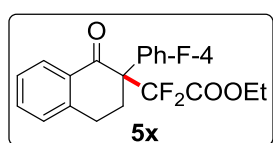

The product **5x** is purified with silica gel chromatography (petroleum ether/ethyl acetate = 10/1 as the eluent) as a yellow oil (83% yield). <sup>1</sup>H NMR (400 MHz, Chloroform-*d*) δ 8.14 (d, *J* = 7.9 Hz, 1H), 7.54 – 7.41 (m, 1H), 7.34 – 7.26 (m, 3H), 7.11 (d, *J* = 7.7 Hz, 1H), 7.05 – 6.92 (m, 2H), 4.33 – 4.20 (m, 2H), 2.99 (td, *J* = 14.2, 13.6, 4.6 Hz, 1H), 2.90 – 2.81 (m, 2H), 2.71 – 2.62 (m, 1H), 1.24 (t, *J* = 7.1 Hz, 3H). <sup>13</sup>C NMR (101 MHz, Chloroform-*d*) δ 195.83 (t, *J* = 2.9 Hz), 163.47 (t, *J* = 32.3 Hz), 162.71 (d, *J* = 248.2 Hz), 143.01, 134.39, 131.71, 130.84 (d, *J* = 8.2 Hz), 128.79, 128.24, 127.95, 127.13, 115.05 (t, *J* = 258.6 Hz), 115.44 (d, *J* = 21.5 Hz), 62.75, 60.29 (dd, *J* = 22.7, 21.1 Hz), 28.49 (dd, *J* = 5.7, 3.2 Hz), 25.15, 13.8. <sup>19</sup>F NMR (376 MHz, Chloroform-*d*) δ -107.44 (d, *J* = 272.4 Hz, 1F), -110.43 (d, *J* = 272.4 Hz, 1F), -113.53 (s, 1F). HRMS (ESI) (*m/z*): [M+H]<sup>+</sup> calcd. for C<sub>20</sub>H<sub>18</sub>O<sub>3</sub>F<sub>3</sub>: 363.1203, found: 363.1208.

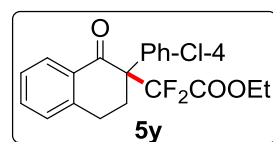

The product **5y** is purified with silica gel chromatography (petroleum ether/ethyl acetate = 10/1 as the eluent) as a yellow oil (85% yield). <sup>1</sup>H NMR (400 MHz, Chloroform-*d*) δ 8.19 – 8.07 (m, 1H), 7.51 – 7.42 (m, 1H), 7.37 – 7.30 (m, 1H), 7.30 – 7.26 (m, 2H), 7.26 – 7.21 (m, 2H), 7.11 (d, *J* = 7.7 Hz, 1H), 4.33 – 4.21 (m, 2H), 3.04 – 2.95 (m, 1H), 2.90 – 2.80 (m, 2H), 2.70 – 2.61 (m, 1H), 1.25 (t, *J* = 7.1 Hz, 3H). <sup>13</sup>C NMR (101 MHz, Chloroform-*d*) δ 195.71 (t, *J* = 2.9 Hz), 163.43 (t, *J* = 32.3 Hz), 142.99, 134.62, 134.47, 131.66, 130.87, 130.43, 128.83, 128.67, 128.25, 127.18, 114.98 (t, *J* = 257.9 Hz), 62.84, 60.38 (dd, *J* = 22.7, 21.0 Hz), 28.37 (dd, *J* = 5.8, 3.2 Hz), 25.14, 13.84. <sup>19</sup>F NMR (376 MHz, Chloroform-*d*) δ -107.37 (d, *J* = 272.6 Hz, 1F), -110.35 (d, *J* = 272.6 Hz, 1F). HRMS (ESI) (*m/z*): [M+H]<sup>+</sup> calcd. for C<sub>20</sub>H<sub>18</sub>O<sub>3</sub>ClF<sub>2</sub>: 379.0907, found: 379.0909.

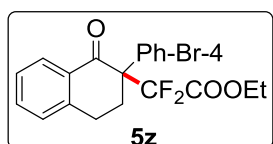

The product **5z** is purified with silica gel chromatography (petroleum ether/ethyl acetate = 10/1 as the eluent) as a yellow oil (85% yield). <sup>1</sup>H NMR (400 MHz, Chloroform-*d*) δ 8.18 – 8.09 (m, 1H), 7.52 – 7.38 (m, 3H), 7.36 – 7.29 (m, 1H), 7.17 (d, *J* = 8.5 Hz, 2H), 7.11 (d, *J* = 7.7 Hz, 1H), 4.33 – 4.21 (m, 2H), 3.03 – 2.95 (m, 1H), 2.90 – 2.80 (m, 2H), 2.70 – 2.61 (m, 1H), 1.25 (t, *J* = 7.1 Hz, 3H). <sup>13</sup>C NMR (101 MHz, Chloroform-*d*) δ 195.66 (t, *J* = 2.9 Hz), 163.39 (t, *J* = 32.2 Hz), 142.97, 134.48, 131.60, 131.40, 130.72, 128.83, 128.22, 127.16, 122.84, 114.89 (t, *J* = 257.9 Hz), 62.84, 60.41 (dd, *J* = 22.7, 21.0 Hz), 28.28 (dd, *J* = 5.7, 3.3 Hz), 25.11, 13.83. <sup>19</sup>F NMR (376 MHz, Chloroform-*d*) δ -107.44 (d, *J* = 272.7 Hz, 1F), -110.39 (d, *J* = 272.6 Hz, 1F). HRMS (ESI) (*m/z*): [M+H]<sup>+</sup> calcd. for C<sub>20</sub>H<sub>18</sub>O<sub>3</sub>BrF<sub>2</sub>: 423.0402, found: 423.0400.



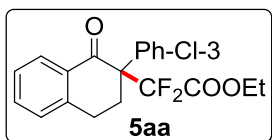

The product **5aa** is purified with silica gel chromatography (petroleum ether/ethyl acetate = 10/1 as the eluent) as a yellow oil (70% yield).  $^1\text{H}$  NMR (400 MHz, Chloroform-*d*)  $\delta$  8.15 (d,  $J = 7.9$  Hz, 1H), 7.52 – 7.41 (m, 1H), 7.35 – 7.11 (m, 6H), 4.33 – 4.18 (m, 2H), 3.00 (td,  $J = 14.2, 13.5, 4.6$  Hz, 1H), 2.90 – 2.82 (m, 2H), 2.72 – 2.63 (m, 1H), 1.22 (t,  $J = 7.1$  Hz, 3H).  $^{13}\text{C}$  NMR (101 MHz, Chloroform-*d*)  $\delta$  195.40 (t,  $J = 2.9$  Hz), 163.28 (t,  $J = 32.3$  Hz), 143.05, 134.50, 131.61, 129.55, 129.16, 128.82, 128.70, 128.31, 127.36, 127.20, 114.96 (t,  $J = 259.6$  Hz), 62.78, 60.62 (dd,  $J = 22.7, 21.0$  Hz), 28.45 (dd,  $J = 5.7, 3.3$  Hz), 25.16, 13.76.  $^{19}\text{F}$  NMR (376 MHz, Chloroform-*d*)  $\delta$  -107.37 (d,  $J = 272.8$  Hz, 1F), -110.00 (d,  $J = 272.7$  Hz, 1F). HRMS (ESI) ( $m/z$ ):  $[\text{M}+\text{H}]^+$  calcd. for  $\text{C}_{20}\text{H}_{18}\text{O}_3\text{ClF}_2$ : 379.0907, found: 379.0914.

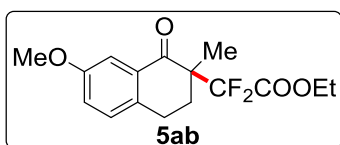

The product **5ab** is purified with silica gel chromatography (petroleum ether/ethyl acetate = 10/1 as the eluent) as a yellow oil (66% yield).  $^1\text{H}$  NMR (400 MHz, Chloroform-*d*)  $\delta$  7.47 (d,  $J = 2.8$  Hz, 1H), 7.15 (d,  $J = 8.4$  Hz, 1H), 7.08 (dd,  $J = 8.4, 2.8$  Hz, 1H), 4.37 (q,  $J = 7.1$  Hz, 2H), 3.81 (s, 3H), 3.06 – 2.93 (m, 2H), 2.60 – 2.53 (m, 1H), 2.08 (dt,  $J = 13.6, 4.6$  Hz, 1H), 1.50 (s, 3H), 1.37 (t,  $J = 7.1$  Hz, 3H).  $^{13}\text{C}$  NMR (101 MHz, Chloroform-*d*)  $\delta$  196.66 (t,  $J = 3.1$  Hz), 163.77 (t,  $J = 32.3$  Hz), 158.60, 135.47, 131.79, 130.05, 122.76, 116.39 (t,  $J = 257.1$  Hz), 109.77, 62.89, 55.56, 51.86 (t,  $J = 22.0$  Hz), 28.60 (dd,  $J = 5.1, 4.0$  Hz), 24.02, 16.64 (t,  $J = 4.1$  Hz), 13.99.  $^{19}\text{F}$  NMR (376 MHz, Chloroform-*d*)  $\delta$  -111.59 (d,  $J = 266.2$  Hz, 1F), -112.41 (d,  $J = 266.2$  Hz, 1F). HRMS (ESI) ( $m/z$ ):  $[\text{M}+\text{H}]^+$  calcd. for  $\text{C}_{16}\text{H}_{19}\text{O}_4\text{F}_2$ : 313.1246, found: 313.1244.

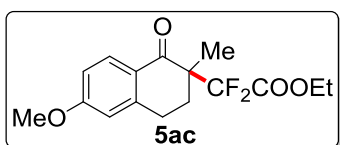

The product **5ac** is purified with silica gel chromatography (petroleum ether/ethyl acetate = 10/1 as the eluent) as a yellow oil (69% yield).  $^1\text{H}$  NMR (400 MHz, Chloroform-*d*)  $\delta$  7.98 (d,  $J = 8.8$  Hz, 1H), 6.83 (dd,  $J = 8.8, 2.4$  Hz, 1H), 6.68 (d,  $J = 2.1$  Hz, 1H), 4.37 (q,  $J = 7.1$  Hz, 2H), 3.85 (s, 3H), 3.11 – 2.96 (m, 2H), 2.58 (ddd,  $J = 13.7, 11.1, 5.6$  Hz, 1H), 2.11 – 2.04 (m, 1H), 1.50 (s, 3H), 1.37 (t,  $J = 7.1$  Hz, 3H).  $^{13}\text{C}$  NMR (101 MHz, Chloroform-*d*)  $\delta$  195.34 (t,  $J = 2.8$  Hz), 164.20, 163.86 (t,  $J = 32.3$  Hz), 145.44, 130.79, 124.69, 116.57 (t,  $J = 258.0$  Hz), 113.81, 112.47, 62.86, 55.62, 51.79 (t,  $J = 21.9$  Hz), 28.56 (dd,  $J = 5.3, 3.4$  Hz), 25.31, 16.99 (t,  $J = 4.2$  Hz), 14.01.  $^{19}\text{F}$  NMR (376 MHz, Chloroform-*d*)  $\delta$  -111.62 (d,  $J = 264.7$  Hz, 1F), -112.54 (d,  $J = 264.8$  Hz, 1F). HRMS (ESI) ( $m/z$ ):  $[\text{M}+\text{H}]^+$  calcd. for  $\text{C}_{16}\text{H}_{19}\text{O}_4\text{F}_2$ : 313.1246, found: 313.1252.

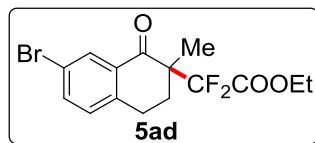

The product **5ad** is purified with silica gel chromatography (petroleum ether/ethyl acetate = 10/1 as the eluent) as a yellow oil (70% yield).  $^1\text{H}$  NMR (400 MHz, Chloroform-*d*)  $\delta$  8.12 (d,  $J = 2.2$  Hz, 1H), 7.60 (dd,  $J = 8.2, 2.2$  Hz, 1H), 7.14 (d,  $J = 8.2$  Hz, 1H), 4.36 (q,  $J = 7.1$  Hz, 2H), 3.01 (dd,  $J = 8.0, 4.9$  Hz, 2H), 2.57 (dt,  $J = 13.9, 8.1$  Hz, 1H), 2.10 (dt,  $J = 13.8, 4.8$  Hz, 1H), 1.48 (s, 3H), 1.36 (t,  $J = 7.2$  Hz, 3H).  $^{13}\text{C}$  NMR (101 MHz, Chloroform-*d*)  $\delta$  195.32 (t,  $J = 2.8$  Hz), 163.52 (t,  $J = 32.2$  Hz), 141.58, 136.83, 132.69, 130.94, 130.66, 121.07, 116.22 (t,  $J = 257.8$  Hz), 63.05, 51.63 (t,  $J = 21.9$  Hz), 28.47 (t,  $J = 4.2$  Hz), 24.47, 16.72 (t,  $J = 4.2$  Hz), 13.98.  $^{19}\text{F}$  NMR (376 MHz, Chloroform-*d*)  $\delta$  -111.57 (s, 2F). HRMS (ESI) ( $m/z$ ):  $[\text{M}+\text{H}]^+$  calcd. for  $\text{C}_{15}\text{H}_{16}\text{O}_3\text{BrF}_2$ : 361.0245, found: 361.0253.

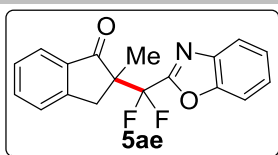

The product **5ae** is purified with silica gel chromatography (petroleum ether/ethyl acetate = 10/1 as the eluent) as a yellow oil (83% yield).  $^1\text{H}$  NMR (400 MHz, Chloroform-*d*)  $\delta$  7.79 (d,  $J$  = 7.7 Hz, 1H), 7.74 (d,  $J$  = 7.4 Hz, 1H), 7.63 – 7.57 (m, 2H), 7.49 – 7.33 (m, 4H), 3.83 (d,  $J$  = 17.6 Hz, 1H), 3.07 (d,  $J$  = 17.6 Hz, 1H), 1.64 (s, 3H).  $^{13}\text{C}$  NMR (101 MHz, Chloroform-*d*)  $\delta$  202.43 (t,  $J$  = 2.2 Hz), 156.64 (t,  $J$  = 33.9 Hz), 151.56, 150.51, 139.98, 135.58, 135.36, 128.02, 126.88, 126.59, 125.30, 124.94, 121.43, 117.14 (t,  $J$  = 249.5 Hz), 111.50, 55.00 (t,  $J$  = 22.6 Hz), 37.47 (t,  $J$  = 2.8 Hz), 19.33 (t,  $J$  = 4.5 Hz).  $^{19}\text{F}$  NMR (376 MHz, Chloroform-*d*)  $\delta$  -102.04 (d,  $J$  = 277.0 Hz, 1F), -105.22 (d,  $J$  = 277.1 Hz, 1F). HRMS (ESI) ( $m/z$ ):  $[\text{M}+\text{H}]^+$  calcd. for  $\text{C}_{18}\text{H}_{14}\text{F}_2\text{NO}_2$ : 314.0987, found: 314.1005.

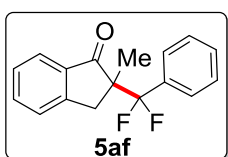

The product **5af** is purified with silica gel chromatography (petroleum ether/ethyl acetate = 10/1 as the eluent) as a yellow oil (73% yield).  $^1\text{H}$  NMR (400 MHz, Chloroform-*d*)  $\delta$  7.71 (d,  $J$  = 7.7 Hz, 1H), 7.59 – 7.52 (m, 1H), 7.46 – 7.30 (m, 7H), 3.67 (d,  $J$  = 17.7 Hz, 1H), 2.91 (d,  $J$  = 17.7 Hz, 1H), 1.45 (s, 3H).  $^{13}\text{C}$  NMR (101 MHz, Chloroform-*d*)  $\delta$  203.81 (t,  $J$  = 2.9 Hz), 151.77, 135.91 (t,  $J$  = 2.0 Hz), 135.34, 134.40 (t,  $J$  = 26.9 Hz), 129.99, 127.87, 127.76, 126.82 (t,  $J$  = 6.7 Hz), 126.31, 124.56, 122.59 (dd,  $J$  = 251.6, 249.7 Hz), 56.06 (t,  $J$  = 26.2 Hz), 37.37 (t,  $J$  = 3.1 Hz), 19.78 (t,  $J$  = 4.5 Hz).  $^{19}\text{F}$  NMR (376 MHz, Chloroform-*d*)  $\delta$  -98.28 (d,  $J$  = 249.5 Hz, 1F), -101.63 (d,  $J$  = 249.5 Hz, 1F). HRMS (ESI) ( $m/z$ ):  $[\text{M}+\text{Na}]^+$  calcd. for  $\text{C}_{17}\text{H}_{14}\text{F}_2\text{ONa}$ : 295.0905, found: 295.0923.

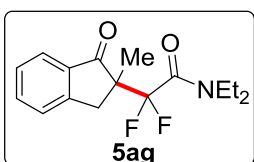

The product **5ag** is purified with silica gel chromatography (petroleum ether/ethyl acetate = 10/1 as the eluent) as a yellow oil (79% yield).  $^1\text{H}$  NMR (400 MHz, Chloroform-*d*)  $\delta$  7.81 (d,  $J$  = 7.6 Hz, 1H), 7.60 – 7.52 (m, 1H), 7.45 – 7.33 (m, 2H), 3.65 – 3.47 (m, 2H), 3.42 (d,  $J$  = 16.9 Hz, 1H), 3.30 – 3.21 (m, 2H), 2.89 (d,  $J$  = 16.9 Hz, 1H), 1.40 (s, 3H), 1.22 (t,  $J$  = 7.0 Hz, 3H), 1.05 (t,  $J$  = 7.1 Hz, 3H).  $^{13}\text{C}$  NMR (101 MHz, Chloroform-*d*)  $\delta$  203.26 (d,  $J$  = 6.2 Hz), 161.44 (t,  $J$  = 29.6 Hz), 150.53, 135.83 (dd,  $J$  = 4.9, 1.1 Hz), 134.55, 127.64, 126.57, 124.70, 120.77 (dd,  $J$  = 266.8, 261.4 Hz), 53.65 (dd,  $J$  = 21.5, 19.6 Hz), 41.55 (t,  $J$  = 6.4 Hz), 41.24, 38.97 (dd,  $J$  = 4.2, 2.2 Hz), 18.88 (dd,  $J$  = 8.2, 3.5 Hz), 14.30, 12.38.  $^{19}\text{F}$  NMR (376 MHz, Chloroform-*d*)  $\delta$  -100.84 (d,  $J$  = 292.3 Hz, 1F), -103.17 (d,  $J$  = 292.3 Hz, 1F). HRMS (ESI) ( $m/z$ ):  $[\text{M}+\text{H}]^+$  calcd. for  $\text{C}_{16}\text{H}_{20}\text{NO}_2\text{F}_2$ : 296.1457, found: 296.1467.

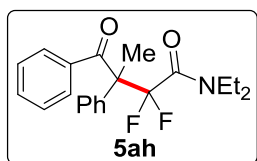

The product **5ah** is purified with silica gel chromatography (petroleum ether/ethyl acetate = 10/1 as the eluent) as a yellow oil (71% yield).  $^1\text{H}$  NMR (400 MHz, Chloroform-*d*)  $\delta$  7.55 – 7.49 (m, 2H), 7.45 – 7.33 (m, 6H), 7.27 – 7.20 (m, 2H), 3.67 – 3.48 (m, 4H), 2.05 (s, 3H), 1.73 – 1.48 (m, 6H).  $^{13}\text{C}$  NMR (101 MHz, Chloroform-*d*)  $\delta$  200.26 (dd,  $J$  = 5.1, 2.1 Hz), 160.89 (t,  $J$  = 29.0 Hz), 137.76 (d,  $J$  = 3.5 Hz), 136.13 (d,  $J$  = 3.1 Hz), 131.45, 129.40, 128.95, 128.49, 128.36, 127.99, 118.54 (dd,  $J$  = 272.1, 257.8 Hz), 60.38 (dd,  $J$  = 21.4, 17.2 Hz), 47.06 (dd,  $J$  = 8.9, 5.6 Hz), 44.78, 26.55, 25.80, 24.60, 21.41 (dd,  $J$  = 6.0, 3.1 Hz).  $^{19}\text{F}$  NMR (376 MHz, Chloroform-*d*)  $\delta$  -96.42 (d,  $J$  = 285.6 Hz, 1F), -104.50 (d,  $J$  = 285.7 Hz, 1F). HRMS (ESI) ( $m/z$ ):  $[\text{M}+\text{H}]^+$  calcd. for  $\text{C}_{22}\text{H}_{24}\text{O}_2\text{F}_2\text{N}$ : 372.1770, found: 372.1774.

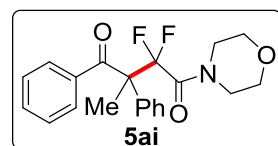

The product **5ai** is purified with silica gel chromatography (petroleum ether/ethyl acetate = 10/1 as the eluent) as a yellow oil (70% yield).  $^1\text{H}$  NMR (400 MHz, Chloroform-*d*)  $\delta$  7.53 – 7.46 (m, 2H), 7.45 – 7.33 (m, 6H), 7.29 – 7.22 (m, 2H), 3.82 – 3.58 (m, 8H), 2.06 (s, 3H).  $^{13}\text{C}$  NMR (101 MHz, Chloroform-*d*)  $\delta$  199.97

(dd,  $J = 5.1, 1.1$  Hz), 161.37 (t,  $J = 29.4$  Hz), 137.18 (d,  $J = 3.5$  Hz), 135.82 (d,  $J = 4.1$  Hz), 131.79, 129.42, 129.14, 128.57, 128.55, 128.09, 118.24 (dd,  $J = 271.1, 256.6$  Hz), 66.87, 60.49 (dd,  $J = 21.4, 17.1$  Hz), 46.85 (dd,  $J = 9.0, 5.1$  Hz), 43.69, 21.17 (dd,  $J = 5.8, 3.2$  Hz).  $^{19}\text{F}$  NMR (376 MHz, Chloroform-*d*)  $\delta$  -95.48 (d,  $J = 287.4$  Hz, 1F), -103.97 (d,  $J = 287.4$  Hz, 1F). HRMS (ESI) ( $m/z$ ):  $[\text{M}+\text{H}]^+$  calcd. for  $\text{C}_{21}\text{H}_{22}\text{O}_3\text{F}_2\text{N}$ : 374.1562, found: 374.1567.

## Mechanistic Studies

### 1. Procedure of other fluoromethylation reagents or non-fluoromethylation reagents:

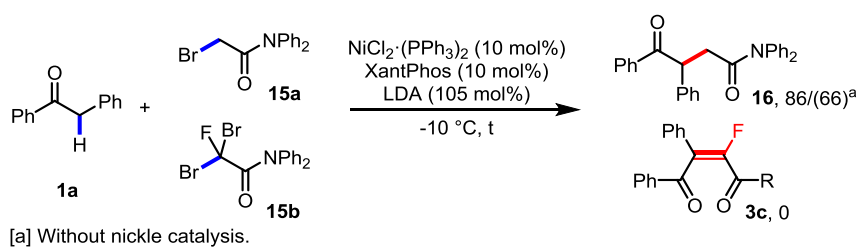

**Figure S1.** Fluorine effect

To a 50 mL of Schlenk tube were added ketone **1a** (1.0 equiv, 0.2 mmol),  $\text{NiCl}_2 \cdot (\text{PPh}_3)_2$  (10 mol %, 0.02 mmol) and XantPhos (10 mol %, 0.02 mmol) under air. The mixture was evacuated and backfilled with  $\text{N}_2$  (3 times). THF (2 mL) was added then followed by LDA (105 mol%, 0.21 mmol) subsequently. The Schlenk tube was then sealed with a Teflon lined cap and put into a cooled bath ( $-10$  °C). After stirring for 5 min, the reaction mixture was added cross-coupling reagents **15** (3.0 equiv, 0.6 mmol), then sealed with a Teflon lined cap and put into a cooled bath ( $-10$  °C) for 12 h. And the mixture was added ethyl acetate 5 mL, then mixture was removed under reduced pressure and purified by flash column chromatography on silica gel to give product as shown above.

### 2. Radical clock experiment:

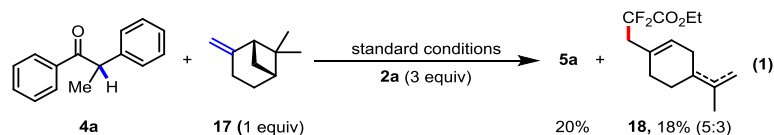

**Figure S2.** Radical trapping experiment with  $\beta$ -piene

To a 50 mL of Schlenk tube were added ketone **4a** (1.0equiv, 0.2 mmol),  $\text{NiCl}_2 \cdot \text{dppe}$  (10 mol %, 0.02 mmol) and XantPhos (10 mol %, 0.02 mmol) under air, followed by  $\text{ZnCl}_2$  (20 mol%, 0.04 mmol). The mixture was evacuated and backfilled with  $\text{N}_2$  (3 times). THF (2 mL) was added then followed by LDA (105 mol%, 0.21 mmol) subsequently. The Schlenk tube was then sealed with a Teflon lined cap and put into a cooled bath ( $-10$  °C). After stirring for 5 min, the reaction mixture was added borndifluoroacetate (3.0 equiv, 0.6 mmol) and  $\beta$ -pinene (1.0 equiv, 0.2 mmol), then sealed with a Teflon lined cap and put into a cooled bath ( $-10$  °C) for 12 h. And the mixture was added ethyl acetate 5 mL, then mixture was removed under reduced pressure and purified by flash column chromatography on silica gel to give product **5a** in 20% yield and ring-open diene product **18** in 18% yield (5 : 3 isomer ratio).

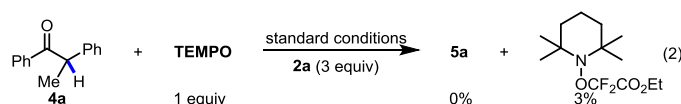

**Figure S3.** Radical trapping experiment with TEMPO

To a 50 mL of Schlenk tube were added ketone **4a** (1.0 equiv, 0.2 mmol), NiCl<sub>2</sub>•dppe (10 mol %, 0.02 mmol), XantPhos (10 mol %, 0.02 mmol) and ZnCl<sub>2</sub> (20 mol %, 0.04 mmol) under air, followed by TEMPO (1.0 equiv, 0.2 mmol). The mixture was evacuated and backfilled with N<sub>2</sub> (3 times). THF (2 mL) was added then followed by LDA (105 mol %, 0.21 mmol) subsequently. The Schlenk tube was then sealed with a Teflon lined cap and put into a cooled bath (-10 °C). After stirring for 5 min, the reaction mixture was added borndifluoroacetate (3.0 equiv, 0.6 mmol), then sealed with a Teflon lined cap and put into a cooled bath (-10 °C) for 12 h. And the mixture was added ethyl acetate 5 mL, then mixture was determined by <sup>19</sup>F NMR analysis.

### 3. Procedure of difluoroalkylation with Ni<sup>I</sup> used as the catalyst<sup>1-3</sup>:

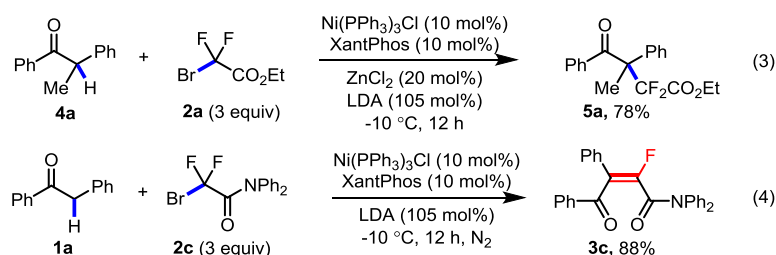

**Figure S4.** Control experiments using Nickel(I) complex

To a 50 mL of Schlenk tube were added ketone **4a** (1.0 equiv, 0.2 mmol), Ni(PPh<sub>3</sub>)<sub>3</sub>Cl (10 mol %, 0.02 mmol), ZnCl<sub>2</sub> (20 mol %, 0.04 mmol) and XantPhos (10 mol %, 0.02 mmol) in glove box. THF (2 mL) was added then followed by LDA (105 mol %, 0.21 mmol) subsequently. The Schlenk tube was then sealed with a Teflon lined cap and put into a cooled bath (-10 °C). After stirring for 5 min, the reaction mixture was added borndifluoroacetate **2a** (3.0 equiv, 0.6 mmol), then sealed with a Teflon lined cap and put into a cooled bath (-10 °C) for 12 h. And the mixture was added ethyl acetate 5 mL, then mixture was removed under reduced pressure and purified by flash column chromatography on silica gel to give product **5a** in 78% yield.

To a 50 mL of Schlenk tube were added ketone **1a** (1.0 equiv, 0.2 mmol), Ni(PPh<sub>3</sub>)<sub>3</sub>Cl (10 mol %, 0.02 mmol) and XantPhos (10 mol %, 0.02 mmol) in glove box. THF (2 mL) was added then followed by LDA (105 mol %, 0.21 mmol) subsequently. The Schlenk tube was then sealed with a Teflon lined cap and put into a cooled bath (-10 °C). After stirring for 5 min, the reaction mixture was added 2-bromo-2,2-difluoro-N,N-diphenylacetamide **2c** (3.0 equiv, 0.6 mmol), then sealed with a Teflon lined cap and put into a cooled bath (-10 °C) for 12 h. And the mixture was added ethyl acetate 5 mL, then mixture was removed under reduced pressure and purified by flash column chromatography on silica gel to give product **3c** in 88% yield.

### 4. The operation of an initial transmetallation:

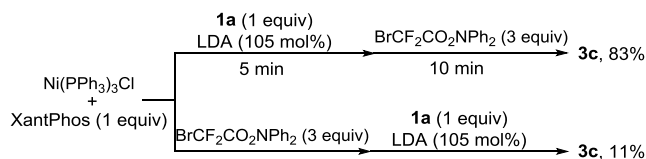

**Figure S5.** The control experiments of transmetallation step and activation of fluoroalkyl bromide

To a 50 mL of Schlenk tube was added Ni(PPh<sub>3</sub>)<sub>3</sub>Cl (1.0 equiv, 0.2 mmol) and XantPhos (1.0 equiv, 0.2 mmol) under air, then was added by **1a** (1.0 equiv, 0.2 mmol). THF (2 mL) was added then followed

by LDA (105 mol%, 0.21 mmol) subsequently. The Schlenk tube was then sealed with a Teflon lined cap and put into a cooled bath (- 10 °C). After stirring for 5 minutes, 2-bromo-2,2-difluoro-N,N-diphenylacetamide **2c** (3.0 equiv, 0.6 mmol) was added to the reaction mixture, and the Schlenk tube was then resealed with a Teflon lined cap and put back into the cooled bath (- 10 °C). After stirring for another 10 minutes, the reaction mixture was diluted with ethyl acetate (5 mL). The solvent was removed under reduced pressure, and the residue was purified by flash column chromatography on silica gel to give the desired product of **3c**. To another 50 mL of Schlenk tube was added Ni(PPh<sub>3</sub>)<sub>3</sub>Cl (1.0 equiv, 0.2 mmol) and XantPhos (1.0 equiv, 0.2 mmol) under air, then was added by 2-bromo-2,2-difluoro-N,N-diphenylacetamide **2c** (3.0 equiv, 0.6 mmol) and THF (2 mL). The Schlenk tube was then sealed with a Teflon lined cap and put into a cooled bath (- 10 °C). After stirring for 5 minutes, **1a** (1.0 equiv, 0.2 mmol) and LDA (105 mol%, 0.21 mmol) were added to the reaction mixture, and the Schlenk tube was then resealed with a Teflon lined cap and put back into the cooled bath (- 10 °C). After stirring for another 10 minutes, the reaction mixture was diluted with ethyl acetate (5 mL). The solvent was removed under reduced pressure, and the residue was purified by flash column chromatography on silica gel to give the desired product of **3c**.

### 5. Generation of Ni(I) species and possible catalytic cycle:

First of all, Ni (II) was treated with lithium diisopropylamide (LDA)<sup>4</sup> to form an active species of Ni(0).<sup>5</sup> The high resolution mass spectra revealed the formation of Me<sub>2</sub>C=NiPr, suggesting that the reduction of Ni(II) occurred through  $\alpha$ -hydride transfer<sup>4</sup> from LDA to Ni(II). Alternatively, the transmetallation with LDA could form a Ni(II)-amido species first and then followed  $\beta$ -hydride elimination to generate the observed imine byproduct. Consequently, comproportionation between Ni(II) and Ni(0), afforded the corresponding Ni(I) complex A.<sup>6</sup> Then transmetallation between Ni(I) catalyst A and in-situ generated enol anion B gave the Ni(I) complex C and D, which furnished the Ni(II) species E and the difluoroalkyl radical via a single-electron oxidation by fluoroalkyl bromide 2. The following radical oxidation of Ni(II) species E afforded Ni(III) intermediated F, followed by reductive elimination resulted in alkyl difluoride 5 when tertiary aryl ketone was used as the substrate (R = aryl or alkyl). Instead, starting from a secondary ketone (R = H), a defluorination took place through a E2 elimination process and furnished a tetrafluoroalkylated monofluoroalkene 3 as the final product.

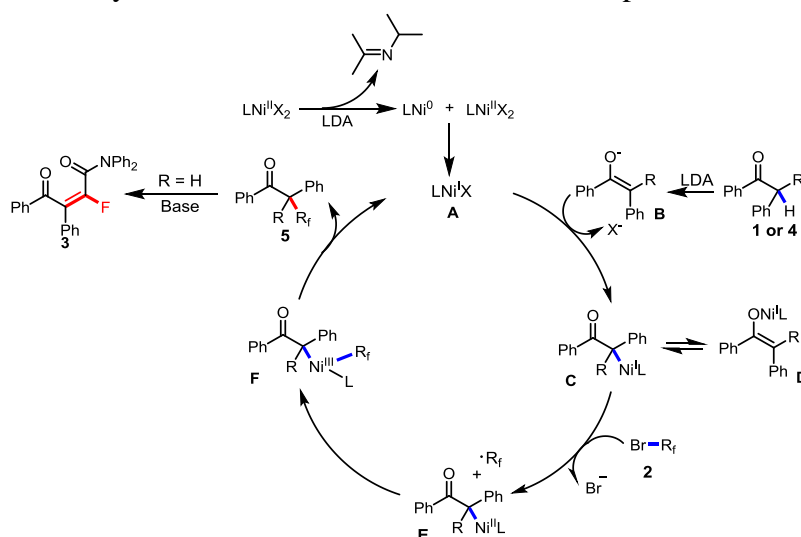

Figure S6. The possible reaction mechanism.

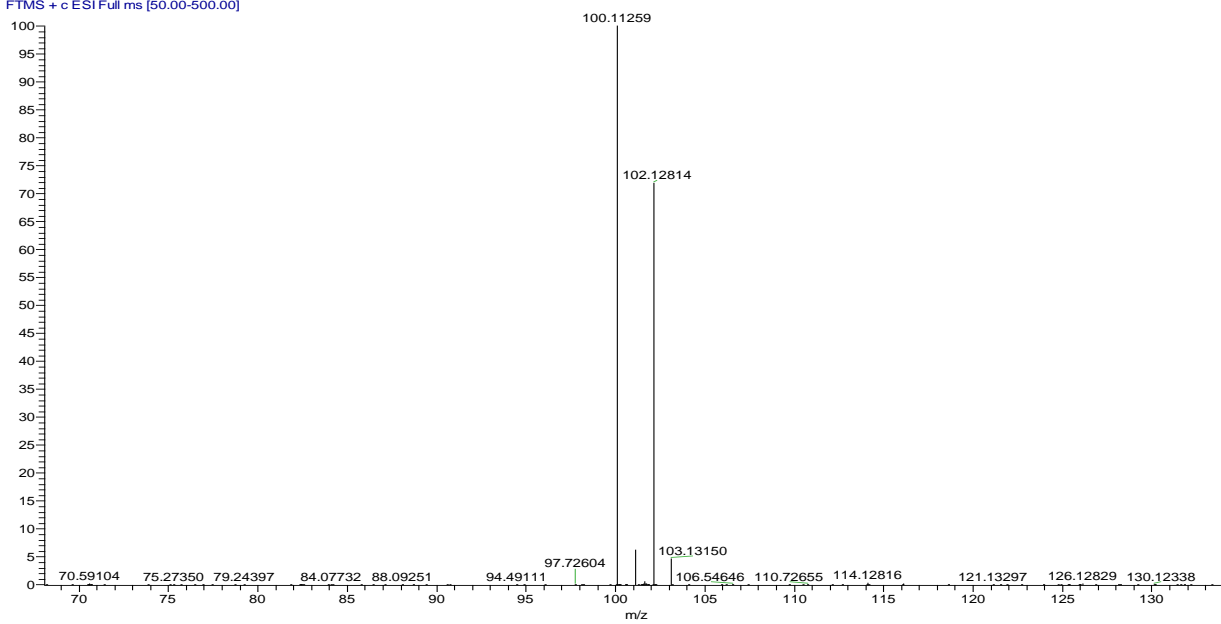

**Figure S7.** The HRMS spectrum of  $\text{Me}_2\text{C}=\text{N}^i\text{Pr}$ .

---

## References:

- (1) C. Liu, S. Tang, D. Liu, J. Yuan, L. Zheng, L. Meng and A. Lei, *Angew. Chem. Int. Ed.* 2012, **51**, 3638.
- (2) A. Wilsily, F. Tramutola, N. A. Owston and G. C. Fu, *J. Am. Chem. Soc.* 2012, **134**, 5794.
- (3) S. L. Zultanski and G. C. Fu, *J. Am. Chem. Soc.* 2013, **135**, 624.
- (4) C. Kowalski, X. Creary, A. J. Rollin and M. C. Burke, *J. Org. Chem.* 1978, **43**, 2601.
- (5) L. Ackermann, *et al. Eur. J. Inorg. Chem.* 2014, **2014**, 818.
- (6) S. J. Hwang, D. C., Powers, A. G. Maherab and D. G. Nocera, *Chem. Sci.* 2015, **6**, 917.

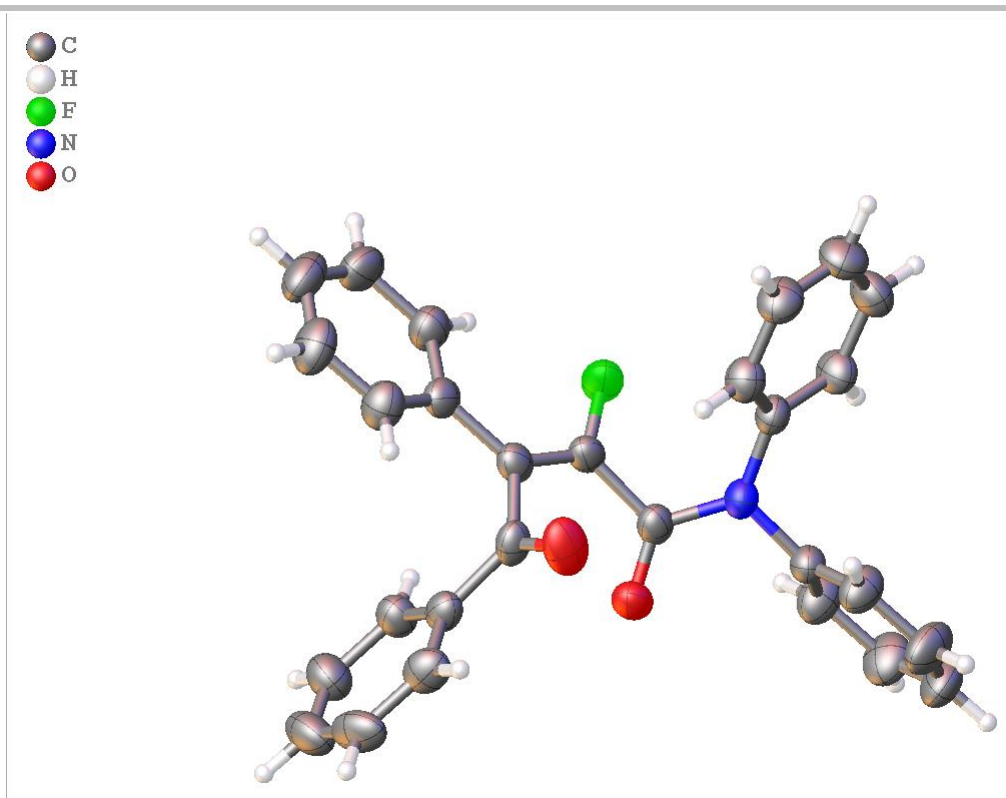

**Figure S6.** X-Ray crystal data of **3c**

**Table S16.** Crystal data and structure refinement for **3c**.

|                                         |                                                                |
|-----------------------------------------|----------------------------------------------------------------|
| Identification code                     | 3c                                                             |
| Empirical formula                       | C <sub>28</sub> H <sub>20</sub> FNO <sub>2</sub>               |
| Formula weight                          | 421.45                                                         |
| Temperature/K                           | 291(2)                                                         |
| Crystal system                          | orthorhombic                                                   |
| Space group                             | P212121                                                        |
| a/Å                                     | 5.9409(2)                                                      |
| b/Å                                     | 10.8429(2)                                                     |
| c/Å                                     | 32.9352(5)                                                     |
| $\alpha$ /°                             | 90                                                             |
| $\beta$ /°                              | 90                                                             |
| $\gamma$ /°                             | 90                                                             |
| Volume/Å <sup>3</sup>                   | 2121.57(9)                                                     |
| Z                                       | 4                                                              |
| $\rho$ calc/cm <sup>3</sup>             | 1.319                                                          |
| $\mu$ /mm <sup>-1</sup>                 | 0.718                                                          |
| F(000)                                  | 880.0                                                          |
| Crystal size/mm <sup>3</sup>            | 0.230 × 0.220 × 0.220                                          |
| Radiation                               | CuK $\alpha$ ( $\lambda$ = 1.54184)                            |
| 2 $\theta$ range for data collection/°  | 8.586 to 142.534                                               |
| Index ranges                            | -6 ≤ h ≤ 5, -13 ≤ k ≤ 11, -40 ≤ l ≤ 40                         |
| Reflections collected                   | 10995                                                          |
| Independent reflections                 | 3964 [ $R_{\text{int}}$ = 0.0279, $R_{\text{sigma}}$ = 0.0247] |
| Data/restraints/parameters              | 3964/0/289                                                     |
| Goodness-of-fit on F <sup>2</sup>       | 1.020                                                          |
| Final R indexes [ $I \geq 2\sigma(I)$ ] | $R_1$ = 0.0438, $wR_2$ = 0.1031                                |



|                                             |                                                   |
|---------------------------------------------|---------------------------------------------------|
| Final R indexes [all data]                  | R <sub>1</sub> = 0.0457, wR <sub>2</sub> = 0.1041 |
| Largest diff. peak/hole / e Å <sup>-3</sup> | 0.14/-0.20                                        |
| Flack parameter                             | 0.06(9)                                           |

**Table S17.** Fractional Atomic Coordinates ( $\times 10^4$ ) and Equivalent Isotropic Displacement Parameters ( $\text{\AA}^2 \times 10^3$ ) for 3c.  $U_{\text{eq}}$  is defined as 1/3 of the trace of the orthogonalised  $U_{\text{IJ}}$  tensor.

| Atom | x        | y          | z          | $U_{\text{eq}}$ |
|------|----------|------------|------------|-----------------|
| F1   | 4936(4)  | 3869.8(17) | 5819.1(6)  | 54.9(5)         |
| O2   | 6256(4)  | 2638(2)    | 6736.5(6)  | 51.2(6)         |
| N1   | 5595(4)  | 1516(2)    | 6167.8(7)  | 38.0(6)         |
| O1   | 11070(5) | 3305(2)    | 6414.8(8)  | 65.4(7)         |
| C7   | 8063(6)  | 4540(3)    | 6191.9(9)  | 39.2(7)         |
| C15  | 6475(6)  | 3718(3)    | 6120.1(8)  | 39.1(7)         |
| C17  | 5903(5)  | 1322(3)    | 5739.9(9)  | 38.2(6)         |
| C16  | 6107(6)  | 2576(3)    | 6368.3(9)  | 39.9(7)         |
| C23  | 5064(6)  | 433(3)     | 6402.8(8)  | 39.9(7)         |
| C1   | 8456(6)  | 5721(3)    | 5972.3(9)  | 42.8(7)         |
| C8   | 9846(5)  | 4150(3)    | 6501.6(10) | 42.1(7)         |
| C9   | 10082(6) | 4864(3)    | 6884.9(9)  | 42.6(7)         |
| C22  | 7880(6)  | 1634(3)    | 5550(1)    | 47.0(8)         |
| C6   | 10505(6) | 6328(3)    | 6010.1(11) | 54.4(9)         |
| C14  | 8415(6)  | 5653(3)    | 7015.7(10) | 48.6(8)         |
| C19  | 4531(7)  | 461(3)     | 5119.9(10) | 56.0(9)         |
| C18  | 4233(6)  | 724(3)     | 5525(1)    | 47.7(8)         |
| C24  | 6567(7)  | -520(3)    | 6403.9(11) | 54.1(9)         |
| C2   | 6824(7)  | 6265(3)    | 5725.2(10) | 51.0(8)         |
| C28  | 3069(6)  | 342(3)     | 6611.3(11) | 53.3(9)         |
| C10  | 12053(6) | 4736(3)    | 7109.9(10) | 53.3(9)         |
| C20  | 6493(7)  | 791(4)     | 4926.2(10) | 59.7(10)        |
| C12  | 10701(8) | 6268(4)    | 7576.3(11) | 66.9(12)        |
| C21  | 8160(7)  | 1380(3)    | 5138.9(10) | 55.6(9)         |
| C11  | 12336(7) | 5454(4)    | 7456.1(11) | 65.3(11)        |
| C13  | 8737(8)  | 6362(4)    | 7361.3(10) | 61.5(10)        |
| C27  | 2589(8)  | -740(4)    | 6817.5(12) | 65.6(11)        |
| C5   | 10924(8) | 7422(4)    | 5810.1(13) | 65.9(10)        |
| C26  | 4068(9)  | -1705(4)   | 6813.4(12) | 69.5(12)        |
| C3   | 7274(8)  | 7352(3)    | 5521.3(11) | 62.4(10)        |
| C4   | 9296(8)  | 7932(3)    | 5561.4(12) | 66.7(11)        |
| C25  | 6071(9)  | -1593(4)   | 6607.2(12) | 72.5(12)        |

**Table S18.** Anisotropic Displacement Parameters ( $\text{\AA}^2 \times 10^3$ ) for 3c. The Anisotropic displacement factor exponent takes the form:  $-2\pi^2[h^2a^2U_{11}+2hka^*b^*U_{12}+\dots]$ .

| Atom | U <sub>11</sub> | U <sub>22</sub> | U <sub>33</sub> | U <sub>23</sub> | U <sub>13</sub> | U <sub>12</sub> |
|------|-----------------|-----------------|-----------------|-----------------|-----------------|-----------------|
| F1   | 65.2(13)        | 44(1)           | 55.5(11)        | 6.2(8)          | -28.7(10)       | -2.5(10)        |
| O2   | 70.0(16)        | 42.6(12)        | 40.9(11)        | 0.0(9)          | -15.3(11)       | 2.7(12)         |
| N1   | 42.8(15)        | 30.5(12)        | 40.6(12)        | -0.4(10)        | -0.2(11)        | -4.1(11)        |
| O1   | 58.7(16)        | 50.7(14)        | 86.8(18)        | -14.5(13)       | -19.3(14)       | 20.2(13)        |
| C7   | 43.9(17)        | 33.7(15)        | 39.8(14)        | -5.3(12)        | -3.8(13)        | 5.7(14)         |
| C15  | 46.3(18)        | 33.8(15)        | 37.2(14)        | -1.2(12)        | -10.6(13)       | 5.0(14)         |
| C17  | 42.9(17)        | 30.6(14)        | 41.2(14)        | 0.6(12)         | 1.2(13)         | -3.1(13)        |
| C16  | 43.0(18)        | 31.9(14)        | 44.9(15)        | -0.7(12)        | -8.4(13)        | 4.0(14)         |
| C23  | 49.6(18)        | 33.4(15)        | 36.7(14)        | -0.8(11)        | 0.1(13)         | -3.8(15)        |
| C1   | 55(2)           | 32.4(15)        | 40.6(15)        | -3.3(12)        | 0.6(14)         | 6.9(15)         |
| C8   | 40.5(17)        | 28.9(14)        | 56.7(18)        | -0.5(13)        | -8.4(15)        | 4.2(13)         |
| C9   | 44.3(18)        | 36.4(16)        | 47.0(16)        | 4.9(12)         | -11.3(14)       | -7.0(14)        |
| C22  | 44.4(19)        | 43.4(18)        | 53.1(18)        | -1.6(14)        | 0.8(15)         | -3.5(15)        |
| C6   | 51(2)           | 47.5(19)        | 65(2)           | 2.2(16)         | -1.6(17)        | -3.0(17)        |
| C14  | 54(2)           | 44.2(18)        | 47.8(17)        | -2.9(14)        | -10.2(15)       | 0.1(16)         |
| C19  | 60(2)           | 57(2)           | 51.0(18)        | -9.4(16)        | -8.2(17)        | -8.6(18)        |
| C18  | 46.7(19)        | 47.7(18)        | 48.7(17)        | -0.7(14)        | 1.7(14)         | -12.3(16)       |
| C24  | 60(2)           | 43.8(18)        | 58.6(19)        | 4.7(15)         | 13.8(17)        | 6.6(17)         |
| C2   | 56(2)           | 40.6(18)        | 55.8(18)        | 1.4(15)         | -6.4(17)        | 2.5(16)         |
| C28  | 51(2)           | 44.8(19)        | 64(2)           | 3.4(16)         | 10.1(17)        | 4.9(17)         |
| C10  | 44(2)           | 56(2)           | 60(2)           | 9.0(16)         | -12.0(16)       | -5.0(17)        |
| C20  | 73(3)           | 64(2)           | 41.7(17)        | -6.1(16)        | 8.2(18)         | 0(2)            |
| C12  | 81(3)           | 76(3)           | 43.9(18)        | -7.4(18)        | -6.5(19)        | -26(3)          |
| C21  | 60(2)           | 54(2)           | 53.1(18)        | 2.1(16)         | 15.0(17)        | -2.0(18)        |
| C11  | 59(2)           | 86(3)           | 51(2)           | 11.7(19)        | -21.7(18)       | -26(2)          |
| C13  | 74(3)           | 59(2)           | 51.7(19)        | -9.2(17)        | -2.7(19)        | -7(2)           |
| C27  | 67(3)           | 59(2)           | 71(2)           | 6.5(19)         | 19(2)           | -15(2)          |
| C5   | 65(3)           | 48(2)           | 85(3)           | 6(2)            | 11(2)           | -10(2)          |
| C26  | 104(3)          | 42(2)           | 63(2)           | 10.0(17)        | 11(2)           | -12(2)          |
| C3   | 85(3)           | 44(2)           | 58(2)           | 8.4(17)         | -6(2)           | 11(2)           |
| C4   | 92(3)           | 41.0(19)        | 67(2)           | 10.5(17)        | 16(2)           | 2(2)            |
| C25  | 103(3)          | 40.5(19)        | 74(2)           | 10.0(18)        | 16(3)           | 20(2)           |

**Table S19.** Bond Lengths for 3c.

| Atom | Atom | Length/Å | Atom | Atom | Length/Å |
|------|------|----------|------|------|----------|
| F1   | C15  | 1.359(3) | C9   | C10  | 1.392(5) |
| O2   | C16  | 1.218(3) | C22  | C21  | 1.392(5) |
| N1   | C16  | 1.360(4) | C6   | C5   | 1.380(5) |
| N1   | C17  | 1.437(4) | C14  | C13  | 1.387(5) |
| N1   | C23  | 1.441(4) | C19  | C18  | 1.376(5) |
| O1   | C8   | 1.204(4) | C19  | C20  | 1.376(5) |
| C7   | C15  | 1.320(4) | C24  | C25  | 1.374(5) |
| C7   | C1   | 1.489(4) | C2   | C3   | 1.382(5) |
| C7   | C8   | 1.530(4) | C28  | C27  | 1.385(5) |
| C15  | C16  | 1.500(4) | C10  | C11  | 1.391(5) |
| C17  | C22  | 1.373(5) | C20  | C21  | 1.371(5) |
| C17  | C18  | 1.380(4) | C12  | C13  | 1.369(6) |
| C23  | C24  | 1.366(5) | C12  | C11  | 1.371(6) |
| C23  | C28  | 1.373(5) | C27  | C26  | 1.366(6) |
| C1   | C6   | 1.390(5) | C5   | C4   | 1.383(6) |
| C1   | C2   | 1.397(5) | C26  | C25  | 1.375(6) |
| C8   | C9   | 1.487(4) | C3   | C4   | 1.362(6) |

**Table S20.** Bond Angles for 3c.

| Atom | Atom | Atom | Angle/°  | Atom | Atom | Atom | Angle/°  |
|------|------|------|----------|------|------|------|----------|
| C16  | N1   | C17  | 124.8(2) | C14  | C9   | C10  | 120.0(3) |
| C16  | N1   | C23  | 118.5(2) | C14  | C9   | C8   | 121.4(3) |
| C17  | N1   | C23  | 115.8(2) | C10  | C9   | C8   | 118.6(3) |
| C15  | C7   | C1   | 127.3(3) | C17  | C22  | C21  | 119.8(3) |
| C15  | C7   | C8   | 115.3(3) | C5   | C6   | C1   | 121.5(4) |
| C1   | C7   | C8   | 117.0(3) | C9   | C14  | C13  | 120.1(3) |
| C7   | C15  | F1   | 122.0(3) | C18  | C19  | C20  | 120.3(3) |
| C7   | C15  | C16  | 124.4(3) | C19  | C18  | C17  | 120.1(3) |
| F1   | C15  | C16  | 113.6(3) | C23  | C24  | C25  | 120.1(4) |
| C22  | C17  | C18  | 119.8(3) | C3   | C2   | C1   | 120.6(4) |
| C22  | C17  | N1   | 121.3(3) | C23  | C28  | C27  | 118.9(3) |
| C18  | C17  | N1   | 118.7(3) | C11  | C10  | C9   | 118.9(4) |
| O2   | C16  | N1   | 123.1(3) | C21  | C20  | C19  | 119.7(3) |
| O2   | C16  | C15  | 119.1(3) | C13  | C12  | C11  | 120.2(3) |
| N1   | C16  | C15  | 117.8(2) | C20  | C21  | C22  | 120.2(3) |
| C24  | C23  | C28  | 120.6(3) | C12  | C11  | C10  | 120.7(4) |
| C24  | C23  | N1   | 118.3(3) | C12  | C13  | C14  | 120.0(4) |
| C28  | C23  | N1   | 121.1(3) | C26  | C27  | C28  | 120.7(4) |
| C6   | C1   | C2   | 117.4(3) | C6   | C5   | C4   | 120.0(4) |
| C6   | C1   | C7   | 120.1(3) | C27  | C26  | C25  | 119.6(3) |
| C2   | C1   | C7   | 122.5(3) | C4   | C3   | C2   | 121.1(4) |
| O1   | C8   | C9   | 122.7(3) | C3   | C4   | C5   | 119.3(4) |
| O1   | C8   | C7   | 118.0(3) | C24  | C25  | C26  | 120.0(4) |
| C9   | C8   | C7   | 119.1(3) |      |      |      |          |

**Table S21.** Torsion Angles for 3c.

| A   | B   | C   | D   | Angle/°   | A   | B   | C   | D   | Angle/°   |
|-----|-----|-----|-----|-----------|-----|-----|-----|-----|-----------|
| C1  | C7  | C15 | F1  | 0.1(5)    | C18 | C17 | C22 | C21 | 2.0(5)    |
| C8  | C7  | C15 | F1  | -172.0(3) | N1  | C17 | C22 | C21 | 177.0(3)  |
| C1  | C7  | C15 | C16 | -176.7(3) | C2  | C1  | C6  | C5  | -0.4(5)   |
| C8  | C7  | C15 | C16 | 11.2(4)   | C7  | C1  | C6  | C5  | 179.9(3)  |
| C16 | N1  | C17 | C22 | 47.2(4)   | C10 | C9  | C14 | C13 | 2.9(5)    |
| C23 | N1  | C17 | C22 | -121.9(3) | C8  | C9  | C14 | C13 | -176.1(3) |
| C16 | N1  | C17 | C18 | -137.7(3) | C20 | C19 | C18 | C17 | 0.0(6)    |
| C23 | N1  | C17 | C18 | 53.2(4)   | C22 | C17 | C18 | C19 | -1.1(5)   |
| C17 | N1  | C16 | O2  | -164.9(3) | N1  | C17 | C18 | C19 | -176.3(3) |
| C23 | N1  | C16 | O2  | 4.0(5)    | C28 | C23 | C24 | C25 | 1.4(5)    |
| C17 | N1  | C16 | C15 | 15.9(5)   | N1  | C23 | C24 | C25 | -176.6(3) |
| C23 | N1  | C16 | C15 | -175.2(3) | C6  | C1  | C2  | C3  | 1.3(5)    |
| C7  | C15 | C16 | O2  | 41.2(5)   | C7  | C1  | C2  | C3  | -178.9(3) |
| F1  | C15 | C16 | O2  | -135.8(3) | C24 | C23 | C28 | C27 | -1.0(5)   |
| C7  | C15 | C16 | N1  | -139.5(3) | N1  | C23 | C28 | C27 | 177.0(3)  |
| F1  | C15 | C16 | N1  | 43.5(4)   | C14 | C9  | C10 | C11 | -2.7(5)   |
| C16 | N1  | C23 | C24 | -110.1(3) | C8  | C9  | C10 | C11 | 176.4(3)  |
| C17 | N1  | C23 | C24 | 59.8(4)   | C18 | C19 | C20 | C21 | 0.3(6)    |
| C16 | N1  | C23 | C28 | 71.8(4)   | C19 | C20 | C21 | C22 | 0.6(6)    |
| C17 | N1  | C23 | C28 | -118.3(3) | C17 | C22 | C21 | C20 | -1.7(5)   |
| C15 | C7  | C1  | C6  | -163.2(3) | C13 | C12 | C11 | C10 | 1.7(6)    |
| C8  | C7  | C1  | C6  | 8.8(4)    | C9  | C10 | C11 | C12 | 0.4(6)    |
| C15 | C7  | C1  | C2  | 17.1(5)   | C11 | C12 | C13 | C14 | -1.4(6)   |
| C8  | C7  | C1  | C2  | -170.9(3) | C9  | C14 | C13 | C12 | -0.9(6)   |
| C15 | C7  | C8  | O1  | 65.9(4)   | C23 | C28 | C27 | C26 | -0.2(6)   |
| C1  | C7  | C8  | O1  | -107.1(3) | C1  | C6  | C5  | C4  | -0.8(6)   |
| C15 | C7  | C8  | C9  | -117.4(3) | C28 | C27 | C26 | C25 | 1.0(6)    |
| C1  | C7  | C8  | C9  | 69.6(4)   | C1  | C2  | C3  | C4  | -1.2(6)   |
| O1  | C8  | C9  | C14 | -166.8(3) | C2  | C3  | C4  | C5  | 0.1(6)    |
| C7  | C8  | C9  | C14 | 16.6(5)   | C6  | C5  | C4  | C3  | 0.9(6)    |
| O1  | C8  | C9  | C10 | 14.1(5)   | C23 | C24 | C25 | C26 | -0.7(6)   |
| C7  | C8  | C9  | C10 | -162.4(3) | C27 | C26 | C25 | C24 | -0.5(7)   |

**Table S22.** Hydrogen Atom Coordinates ( $\text{\AA}\times 10^4$ ) and Isotropic Displacement Parameters ( $\text{\AA}^2\times 10^3$ ) for 3c.

| Atom | x     | y    | z    | $U_{(eq)}$ |
|------|-------|------|------|------------|
| H22  | 9028  | 2014 | 5696 | 56         |
| H6   | 11620 | 5989 | 6174 | 65         |
| H14  | 7071  | 5709 | 6872 | 58         |
| H19  | 3401  | 58   | 4976 | 67         |
| H18  | 2903  | 499  | 5654 | 57         |
| H24  | 7929  | -443 | 6267 | 65         |
| H2   | 5422  | 5893 | 5698 | 61         |
| H28  | 2056  | 996  | 6614 | 64         |
| H10  | 13160 | 4181 | 7030 | 64         |
| H20  | 6688  | 615  | 4652 | 72         |
| H12  | 10927 | 6758 | 7804 | 80         |
| H21  | 9481  | 1611 | 5008 | 67         |

|     |       |       |      |    |
|-----|-------|-------|------|----|
| H11 | 13650 | 5380  | 7608 | 78 |
| H13 | 7617  | 6903  | 7447 | 74 |
| H27 | 1245  | -811  | 6960 | 79 |
| H5  | 12302 | 7817  | 5843 | 79 |
| H26 | 3723  | -2432 | 6949 | 83 |
| H3  | 6177  | 7693  | 5354 | 75 |
| H4  | 9578  | 8663  | 5423 | 80 |
| H25 | 7090  | -2245 | 6605 | 87 |

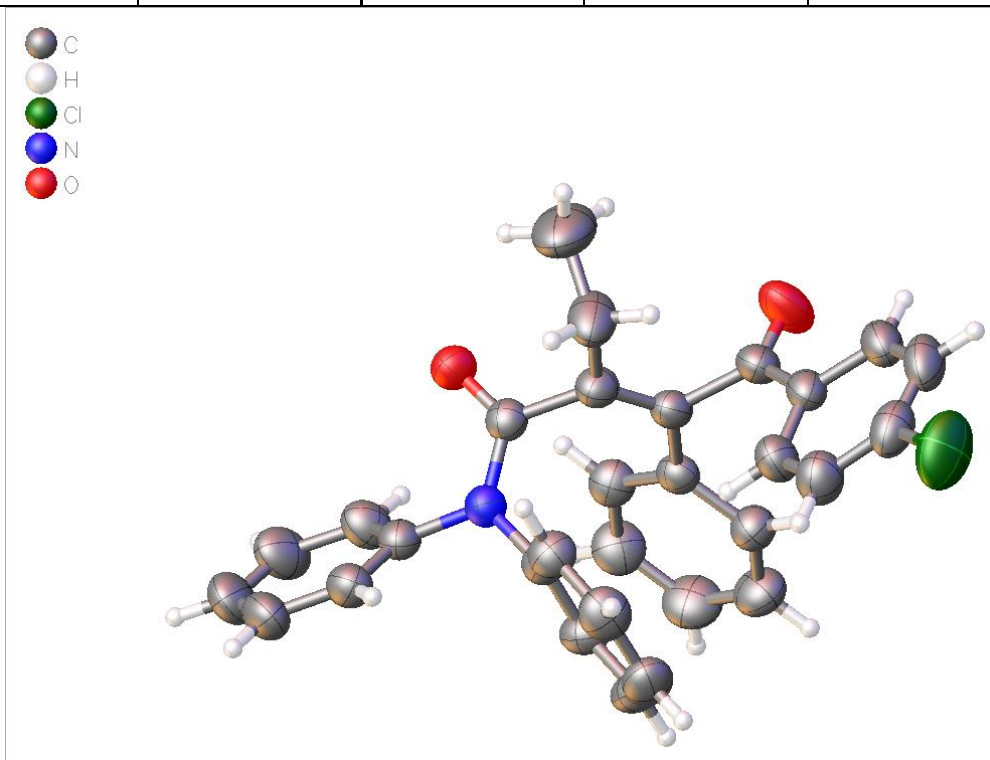

Figure S8. X-Ray crystal data of 6

Table S23. Crystal data and structure refinement for 6.

|                              |                                                   |
|------------------------------|---------------------------------------------------|
| Identification code          | 6                                                 |
| Empirical formula            | C <sub>30</sub> H <sub>24</sub> ClNO <sub>2</sub> |
| Formula weight               | 465.95                                            |
| Temperature/K                | 291(2)                                            |
| Crystal system               | monoclinic                                        |
| Space group                  | I2/a                                              |
| a/Å                          | 18.3331(3)                                        |
| b/Å                          | 14.0402(2)                                        |
| c/Å                          | 20.1069(3)                                        |
| $\alpha$ / °                 | 90                                                |
| $\beta$ / °                  | 107.894(2)                                        |
| $\gamma$ / °                 | 90                                                |
| Volume/Å <sup>3</sup>        | 4925.17(14)                                       |
| Z                            | 8                                                 |
| $\rho$ calcg/cm <sup>3</sup> | 1.257                                             |
| $\mu$ /mm <sup>-1</sup>      | 1.581                                             |
| F(000)                       | 1952.0                                            |
| Crystal size/mm <sup>3</sup> | 0.280 × 0.250 × 0.220                             |
| Radiation                    | CuK $\alpha$ ( $\lambda$ = 1.54184)               |

|                                                  |                                                                        |
|--------------------------------------------------|------------------------------------------------------------------------|
| 2 $\theta$ range for data collection/ $^{\circ}$ | 7.81 to 142.704                                                        |
| Index ranges                                     | -22 $\leq$ h $\leq$ 20, -17 $\leq$ k $\leq$ 16, -24 $\leq$ l $\leq$ 23 |
| Reflections collected                            | 9721                                                                   |
| Independent reflections                          | 4666 [R <sub>int</sub> = 0.0174, R <sub>sigma</sub> = 0.0190]          |
| Data/restraints/parameters                       | 4666/0/308                                                             |
| Goodness-of-fit on F <sup>2</sup>                | 1.055                                                                  |
| Final R indexes [I $\geq$ 2 $\sigma$ (I)]        | R <sub>1</sub> = 0.0542, wR <sub>2</sub> = 0.1569                      |
| Final R indexes [all data]                       | R <sub>1</sub> = 0.0607, wR <sub>2</sub> = 0.1635                      |
| Largest diff. peak/hole / e $\text{Å}^{-3}$      | 0.81/-0.36                                                             |

**Table S24.** Fractional Atomic Coordinates ( $\times 10^4$ ) and Equivalent Isotropic Displacement Parameters ( $\text{Å}^2 \times 10^3$ ) for 6. U<sub>eq</sub> is defined as 1/3 of of the trace of the orthogonalised U<sub>ij</sub> tensor.

| Atom | x          | y          | z          | U <sub>(eq)</sub> |
|------|------------|------------|------------|-------------------|
| Cl1  | 8538.5(4)  | 1520.5(7)  | 4206.6(5)  | 106.7(3)          |
| O2   | 3326.5(8)  | 3045.9(10) | 2203.9(7)  | 55.7(4)           |
| N1   | 4005.4(8)  | 3782.5(11) | 3207.3(8)  | 45.0(4)           |
| O1   | 4908(1)    | 51.5(12)   | 3086.2(11) | 81.6(5)           |
| C25  | 4715.3(10) | 3896.0(13) | 3764.3(9)  | 45.3(4)           |
| C16  | 3889.3(10) | 3069.7(13) | 2724.4(9)  | 44.7(4)           |
| C9   | 4237.8(11) | 1554.7(12) | 3860.6(9)  | 44.6(4)           |
| C8   | 4616.1(10) | 1631.7(13) | 3306.9(9)  | 45.2(4)           |
| C19  | 3428.3(11) | 4507.4(13) | 3134.8(9)  | 47.5(4)           |
| C15  | 4493.8(11) | 2315.0(14) | 2819.4(9)  | 49.0(4)           |
| C4   | 6004.5(12) | 991.2(14)  | 3573.8(9)  | 50.2(4)           |
| C10  | 3474.4(11) | 1801.7(14) | 3744.2(11) | 52.1(5)           |
| C7   | 5165.9(12) | 824.7(14)  | 3307.9(10) | 53.3(5)           |
| C30  | 5363.6(12) | 4220.3(15) | 3625.1(11) | 55.1(5)           |
| C20  | 3639.1(13) | 5452.8(15) | 3182.7(11) | 56.7(5)           |
| C26  | 4735.5(13) | 3713.8(15) | 4445.6(10) | 54.9(5)           |
| C14  | 4659.1(12) | 1224.8(15) | 4523.6(10) | 54.8(5)           |
| C3   | 6305.1(12) | 1861.5(16) | 3858.9(12) | 59.0(5)           |
| C24  | 2665.8(12) | 4265.5(17) | 3005.8(12) | 61.3(5)           |
| C5   | 6502.9(13) | 273.9(16)  | 3519.0(11) | 59.9(5)           |
| C29  | 6033.6(12) | 4357.8(17) | 4174.3(13) | 65.6(6)           |
| C27  | 5407.3(15) | 3848.0(18) | 4982.1(11) | 67.1(6)           |
| C11  | 3155.4(13) | 1770.8(18) | 4283.7(13) | 66.0(6)           |
| C6   | 7282.3(14) | 435.3(19)  | 3719.2(13) | 71.3(7)           |
| C2   | 7087.3(14) | 2023.2(18) | 4061.8(13) | 68.8(6)           |
| C13  | 4335.7(15) | 1185.5(18) | 5059.9(12) | 67.5(6)           |
| C28  | 6053.8(14) | 4169.1(17) | 4849.1(12) | 68.2(6)           |
| C1   | 7560.9(13) | 1309(2)    | 3980.5(13) | 68.2(6)           |
| C21  | 3087.9(17) | 6157.3(17) | 3092.4(13) | 73.0(7)           |
| C12  | 3587.5(16) | 1466(2)    | 4941.1(14) | 74.2(7)           |
| C22  | 2328.6(16) | 5916(2)    | 2940.4(15) | 80.9(8)           |
| C17  | 4884.3(17) | 2363(2)    | 2249.2(13) | 80.9(8)           |
| C23  | 2118.2(14) | 4973(2)    | 2900.2(15) | 78.4(7)           |
| C18  | 4445(2)    | 1979(3)    | 1573.3(16) | 121.8(15)         |

**Table S25.** Anisotropic Displacement Parameters ( $\text{\AA}^2 \times 10^3$ ) for 6. The Anisotropic displacement factor exponent takes the form:  $-2\pi^2[h^2a^2U_{11}+2hka^*b^*U_{12}+\dots]$ .

| Atom | $U_{11}$ | $U_{22}$ | $U_{33}$  | $U_{23}$  | $U_{13}$ | $U_{12}$ |
|------|----------|----------|-----------|-----------|----------|----------|
| Cl   | 54.0(4)  | 139.8(8) | 120.7(7)  | 31.0(5)   | 18.4(4)  | 16.3(4)  |
| O2   | 50.6(7)  | 59.2(8)  | 50.9(7)   | -6.4(6)   | 6.1(6)   | 4.4(6)   |
| N1   | 44.1(8)  | 45.5(8)  | 44.6(8)   | -0.8(6)   | 12.7(6)  | 2.2(6)   |
| O1   | 75.9(11) | 57.5(9)  | 102.6(13) | -29.1(9)  | 14.3(9)  | 5.8(8)   |
| C25  | 48(1)    | 42.4(9)  | 44.7(9)   | -2.2(7)   | 13.0(7)  | 1.8(7)   |
| C16  | 46.1(9)  | 47.0(9)  | 42.5(9)   | 3.0(7)    | 15.7(7)  | 0.6(7)   |
| C9   | 50.0(9)  | 38.5(8)  | 45.4(9)   | -3.9(7)   | 14.9(7)  | -2.6(7)  |
| C8   | 46.1(9)  | 45.5(9)  | 42.6(8)   | -6.3(7)   | 11.5(7)  | 3.0(7)   |
| C19  | 50.9(10) | 50.4(10) | 41.4(9)   | -1.5(7)   | 14.4(7)  | 5.6(8)   |
| C15  | 49(1)    | 56.3(11) | 43.2(9)   | -1.7(8)   | 16.2(8)  | 7.3(8)   |
| C4   | 59.6(11) | 50.5(10) | 42.2(9)   | 2.0(8)    | 18.4(8)  | 14.0(8)  |
| C10  | 49.2(10) | 50.7(10) | 56.7(10)  | 1.3(8)    | 16.8(8)  | -6.2(8)  |
| C7   | 63.2(12) | 49.5(10) | 46.7(9)   | -7.4(8)   | 16.1(9)  | 9.1(9)   |
| C30  | 53.8(11) | 58.9(11) | 54.7(11)  | 1.8(9)    | 19.6(9)  | -2.6(9)  |
| C20  | 64.1(12) | 51.2(11) | 52.5(10)  | -2.9(8)   | 14.5(9)  | 2.5(9)   |
| C26  | 63.2(12) | 56.3(11) | 47(1)     | -4.1(8)   | 19.5(9)  | -6.2(9)  |
| C14  | 57.9(11) | 56.4(11) | 50(1)     | 2.0(8)    | 16.6(9)  | 5.0(9)   |
| C3   | 58.1(12) | 54.6(11) | 62.6(12)  | -3.5(9)   | 15.9(9)  | 11.8(9)  |
| C24  | 53.8(11) | 62.8(12) | 70.5(13)  | -9.2(10)  | 23.5(10) | 2.4(9)   |
| C5   | 74.2(14) | 53.2(11) | 54.4(11)  | 4.6(9)    | 22.8(10) | 19.3(10) |
| C29  | 49.3(11) | 67.6(13) | 78.4(15)  | -4.6(11)  | 17.3(10) | -6.4(10) |
| C27  | 81.2(15) | 70.1(14) | 43.9(10)  | -4.0(9)   | 10.2(10) | -5.8(12) |
| C11  | 56.8(12) | 73.3(14) | 75.5(14)  | 3.7(11)   | 31.5(11) | -4.4(10) |
| C6   | 70.7(15) | 78.3(16) | 69.5(14)  | 17.2(12)  | 28.5(12) | 35.0(12) |
| C2   | 61.5(13) | 66.5(14) | 73.1(14)  | 2.2(11)   | 13.0(11) | 6.0(11)  |
| C13  | 81.4(16) | 73.5(14) | 50.4(11)  | 7.6(10)   | 24.4(11) | 1.4(12)  |
| C28  | 62.3(13) | 66.6(13) | 62.2(13)  | -10.1(11) | -0.9(10) | -2.0(11) |
| C1   | 55.6(12) | 86.8(17) | 61.2(12)  | 19.1(12)  | 16.5(10) | 17.8(11) |
| C21  | 96.4(19) | 51.7(12) | 67.2(14)  | -4.6(10)  | 20.0(13) | 15.7(12) |
| C12  | 80.7(16) | 85.4(17) | 70.5(15)  | 3.7(12)   | 43.7(13) | -6.7(13) |
| C22  | 79.7(17) | 79.3(17) | 81.0(16)  | -10.1(13) | 20.7(13) | 32.4(14) |
| C17  | 91.2(18) | 100(2)   | 63.2(13)  | 17.3(13)  | 40.4(13) | 39.8(15) |
| C23  | 56.5(13) | 92.8(19) | 86.8(17)  | -19.9(14) | 23.1(12) | 14.8(12) |
| C18  | 146(3)   | 162(4)   | 60.8(16)  | -0.5(19)  | 36.4(19) | 53(3)    |

**Table S26.** Bond Lengths for 6.

| Atom | Atom | Length/Å | Atom | Atom | Length/Å |
|------|------|----------|------|------|----------|
| Cl1  | C1   | 1.734(3) | C4   | C7   | 1.483(3) |
| O2   | C16  | 1.224(2) | C10  | C11  | 1.382(3) |
| N1   | C16  | 1.365(2) | C30  | C29  | 1.390(3) |
| N1   | C25  | 1.442(2) | C20  | C21  | 1.386(3) |
| N1   | C19  | 1.443(2) | C26  | C27  | 1.378(3) |
| O1   | C7   | 1.213(3) | C14  | C13  | 1.382(3) |
| C25  | C30  | 1.379(3) | C3   | C2   | 1.384(3) |
| C25  | C26  | 1.383(3) | C24  | C23  | 1.381(3) |
| C16  | C15  | 1.502(3) | C5   | C6   | 1.379(4) |
| C9   | C10  | 1.390(3) | C29  | C28  | 1.372(4) |
| C9   | C14  | 1.398(3) | C27  | C28  | 1.369(4) |
| C9   | C8   | 1.485(3) | C11  | C12  | 1.383(4) |
| C8   | C15  | 1.340(3) | C6   | C1   | 1.371(4) |
| C8   | C7   | 1.516(3) | C2   | C1   | 1.368(3) |
| C19  | C20  | 1.377(3) | C13  | C12  | 1.376(4) |
| C19  | C24  | 1.383(3) | C21  | C22  | 1.373(4) |
| C15  | C17  | 1.528(3) | C22  | C23  | 1.374(4) |
| C4   | C5   | 1.387(3) | C17  | C18  | 1.454(5) |
| C4   | C3   | 1.390(3) |      |      |          |

**Table S27.** Bond Angles for 6.

| Atom | Atom | Atom | Angle/°    | Atom | Atom | Atom | Angle/°    |
|------|------|------|------------|------|------|------|------------|
| C16  | N1   | C25  | 122.68(15) | O1   | C7   | C4   | 121.15(18) |
| C16  | N1   | C19  | 119.76(15) | O1   | C7   | C8   | 118.98(19) |
| C25  | N1   | C19  | 117.35(14) | C4   | C7   | C8   | 119.86(17) |
| C30  | C25  | C26  | 119.98(18) | C25  | C30  | C29  | 119.4(2)   |
| C30  | C25  | N1   | 120.49(17) | C19  | C20  | C21  | 120.1(2)   |
| C26  | C25  | N1   | 119.48(17) | C27  | C26  | C25  | 119.7(2)   |
| O2   | C16  | N1   | 122.31(17) | C13  | C14  | C9   | 120.9(2)   |
| O2   | C16  | C15  | 119.00(16) | C2   | C3   | C4   | 120.6(2)   |
| N1   | C16  | C15  | 118.62(15) | C23  | C24  | C19  | 119.8(2)   |
| C10  | C9   | C14  | 118.41(18) | C6   | C5   | C4   | 120.4(2)   |
| C10  | C9   | C8   | 122.24(17) | C28  | C29  | C30  | 120.5(2)   |
| C14  | C9   | C8   | 119.35(17) | C28  | C27  | C26  | 120.7(2)   |
| C15  | C8   | C9   | 126.05(17) | C10  | C11  | C12  | 120.2(2)   |
| C15  | C8   | C7   | 119.85(17) | C1   | C6   | C5   | 119.3(2)   |
| C9   | C8   | C7   | 114.08(16) | C1   | C2   | C3   | 118.9(2)   |
| C20  | C19  | C24  | 119.69(19) | C12  | C13  | C14  | 119.8(2)   |
| C20  | C19  | N1   | 119.44(18) | C27  | C28  | C29  | 119.7(2)   |
| C24  | C19  | N1   | 120.86(18) | C2   | C1   | C6   | 121.8(2)   |
| C8   | C15  | C16  | 123.29(16) | C2   | C1   | Cl1  | 119.1(2)   |
| C8   | C15  | C17  | 124.63(18) | C6   | C1   | Cl1  | 119.15(19) |
| C16  | C15  | C17  | 111.78(17) | C22  | C21  | C20  | 120.1(2)   |
| C5   | C4   | C3   | 118.9(2)   | C13  | C12  | C11  | 120.1(2)   |
| C5   | C4   | C7   | 119.49(19) | C21  | C22  | C23  | 119.9(2)   |
| C3   | C4   | C7   | 121.53(17) | C18  | C17  | C15  | 115.6(3)   |
| C11  | C10  | C9   | 120.5(2)   | C22  | C23  | C24  | 120.4(2)   |



**Table S28.** Torsion Angles for 6.

| A   | B   | C   | D   | Angle/°     | A   | B   | C   | D   | Angle/°     |
|-----|-----|-----|-----|-------------|-----|-----|-----|-----|-------------|
| C16 | N1  | C25 | C30 | 72.3(2)     | C26 | C25 | C30 | C29 | 0.2(3)      |
| C19 | N1  | C25 | C30 | -102.4(2)   | N1  | C25 | C30 | C29 | 177.60(19)  |
| C16 | N1  | C25 | C26 | -110.3(2)   | C24 | C19 | C20 | C21 | -0.9(3)     |
| C19 | N1  | C25 | C26 | 75.0(2)     | N1  | C19 | C20 | C21 | 177.97(19)  |
| C25 | N1  | C16 | O2  | -170.52(17) | C30 | C25 | C26 | C27 | -0.7(3)     |
| C19 | N1  | C16 | O2  | 4.1(3)      | N1  | C25 | C26 | C27 | -178.12(19) |
| C25 | N1  | C16 | C15 | 6.5(3)      | C10 | C9  | C14 | C13 | -2.9(3)     |
| C19 | N1  | C16 | C15 | -178.97(16) | C8  | C9  | C14 | C13 | 177.01(19)  |
| C10 | C9  | C8  | C15 | 36.6(3)     | C5  | C4  | C3  | C2  | 2.3(3)      |
| C14 | C9  | C8  | C15 | -143.3(2)   | C7  | C4  | C3  | C2  | -175.7(2)   |
| C10 | C9  | C8  | C7  | -141.41(18) | C20 | C19 | C24 | C23 | 2.4(3)      |
| C14 | C9  | C8  | C7  | 38.7(2)     | N1  | C19 | C24 | C23 | -176.4(2)   |
| C16 | N1  | C19 | C20 | -130.55(19) | C3  | C4  | C5  | C6  | -2.5(3)     |
| C25 | N1  | C19 | C20 | 44.3(2)     | C7  | C4  | C5  | C6  | 175.59(19)  |
| C16 | N1  | C19 | C24 | 48.3(3)     | C25 | C30 | C29 | C28 | 0.3(4)      |
| C25 | N1  | C19 | C24 | -136.85(19) | C25 | C26 | C27 | C28 | 0.7(4)      |
| C9  | C8  | C15 | C16 | -5.8(3)     | C9  | C10 | C11 | C12 | -1.9(3)     |
| C7  | C8  | C15 | C16 | 172.13(17)  | C4  | C5  | C6  | C1  | 0.7(3)      |
| C9  | C8  | C15 | C17 | -178.9(2)   | C4  | C3  | C2  | C1  | -0.3(4)     |
| C7  | C8  | C15 | C17 | -1.0(3)     | C9  | C14 | C13 | C12 | 0.5(4)      |
| O2  | C16 | C15 | C8  | -109.8(2)   | C26 | C27 | C28 | C29 | -0.1(4)     |
| N1  | C16 | C15 | C8  | 73.1(2)     | C30 | C29 | C28 | C27 | -0.4(4)     |
| O2  | C16 | C15 | C17 | 64.2(3)     | C3  | C2  | C1  | C6  | -1.5(4)     |
| N1  | C16 | C15 | C17 | -112.9(2)   | C3  | C2  | C1  | C11 | 177.88(19)  |
| C14 | C9  | C10 | C11 | 3.5(3)      | C5  | C6  | C1  | C2  | 1.3(4)      |
| C8  | C9  | C10 | C11 | -176.35(19) | C5  | C6  | C1  | C11 | -178.05(17) |
| C5  | C4  | C7  | O1  | 5.0(3)      | C19 | C20 | C21 | C22 | -1.4(4)     |
| C3  | C4  | C7  | O1  | -176.9(2)   | C14 | C13 | C12 | C11 | 1.2(4)      |
| C5  | C4  | C7  | C8  | -174.61(17) | C10 | C11 | C12 | C13 | -0.5(4)     |
| C3  | C4  | C7  | C8  | 3.4(3)      | C20 | C21 | C22 | C23 | 2.1(4)      |
| C15 | C8  | C7  | O1  | -103.1(3)   | C8  | C15 | C17 | C18 | 97.2(3)     |
| C9  | C8  | C7  | O1  | 75.0(2)     | C16 | C15 | C17 | C18 | -76.7(3)    |
| C15 | C8  | C7  | C4  | 76.5(2)     | C21 | C22 | C23 | C24 | -0.6(4)     |
| C9  | C8  | C7  | C4  | -105.3(2)   | C19 | C24 | C23 | C22 | -1.7(4)     |

**Table S29.** Hydrogen Atom Coordinates ( $\text{\AA} \times 10^4$ ) and Isotropic Displacement Parameters ( $\text{\AA}^2 \times 10^3$ ) for 6.

| Atom | x    | y    | z    | $U_{\text{eq}}$ |
|------|------|------|------|-----------------|
| H10  | 3176 | 1989 | 3300 | 62              |
| H30  | 5352 | 4346 | 3168 | 66              |
| H20  | 4152 | 5618 | 3276 | 68              |
| H26  | 4298 | 3502 | 4541 | 66              |
| H14  | 5164 | 1029 | 4605 | 66              |
| H3   | 5977 | 2340 | 3914 | 71              |
| H24  | 2522 | 3628 | 2990 | 74              |
| H5   | 6310 | -320 | 3346 | 72              |
| H29  | 6472 | 4580 | 4084 | 79              |
| H27  | 5422 | 3719 | 5440 | 81              |

|      |      |      |      |     |
|------|------|------|------|-----|
| H11  | 2649 | 1955 | 4205 | 79  |
| H6   | 7615 | -44  | 3677 | 86  |
| H2   | 7288 | 2607 | 4250 | 83  |
| H13  | 4623 | 970  | 5500 | 81  |
| H28  | 6504 | 4259 | 5214 | 82  |
| H21  | 3232 | 6795 | 3135 | 88  |
| H12  | 3372 | 1452 | 5303 | 89  |
| H22  | 1957 | 6389 | 2865 | 97  |
| H17A | 5003 | 3023 | 2187 | 97  |
| H17B | 5366 | 2020 | 2411 | 97  |
| H23  | 1604 | 4810 | 2801 | 94  |
| H18A | 4736 | 2043 | 1251 | 183 |
| H18B | 3972 | 2322 | 1399 | 183 |
| H18C | 4338 | 1318 | 1623 | 183 |

# NMR Spectra of New Compounds (<sup>1</sup>H NMR, <sup>19</sup>F NMR, <sup>13</sup>C NMR)

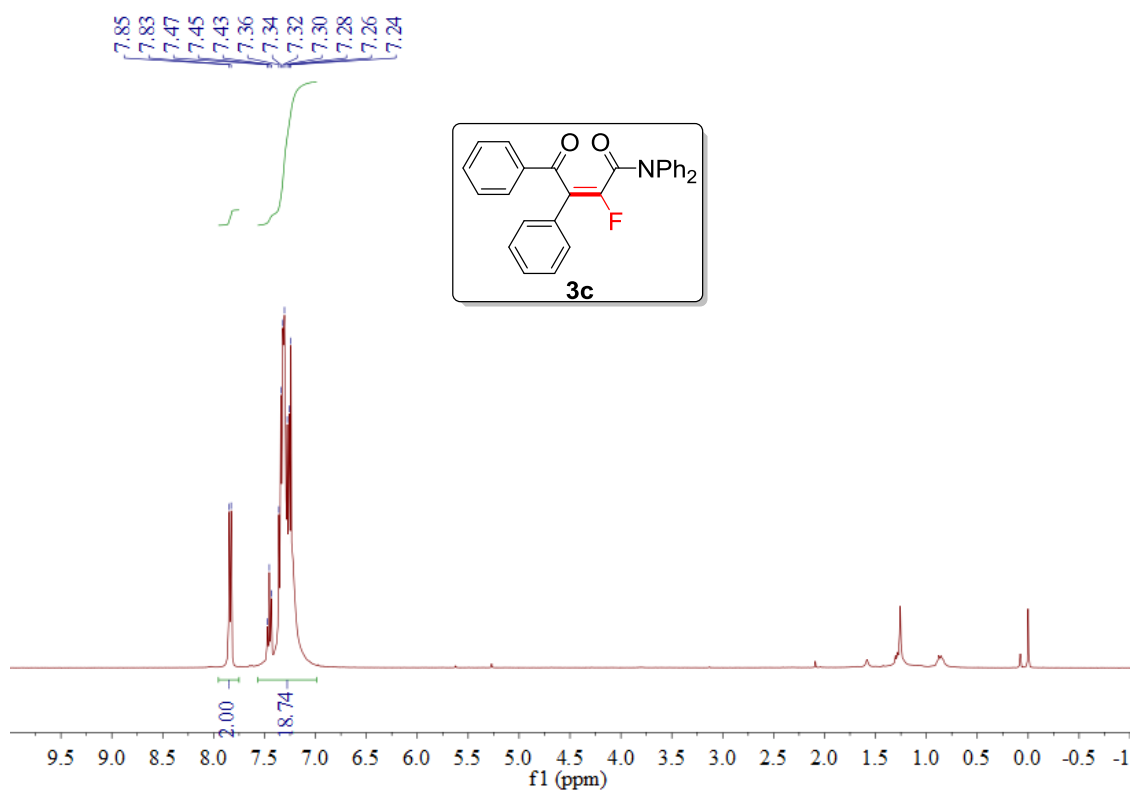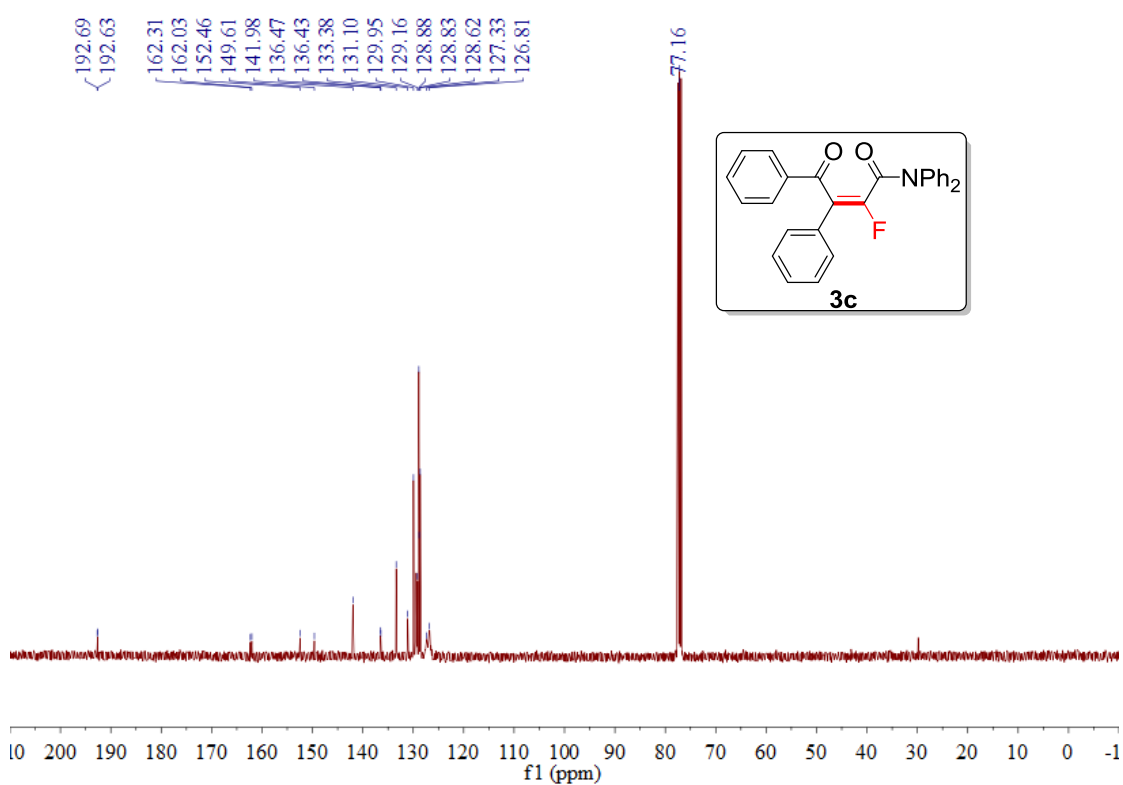

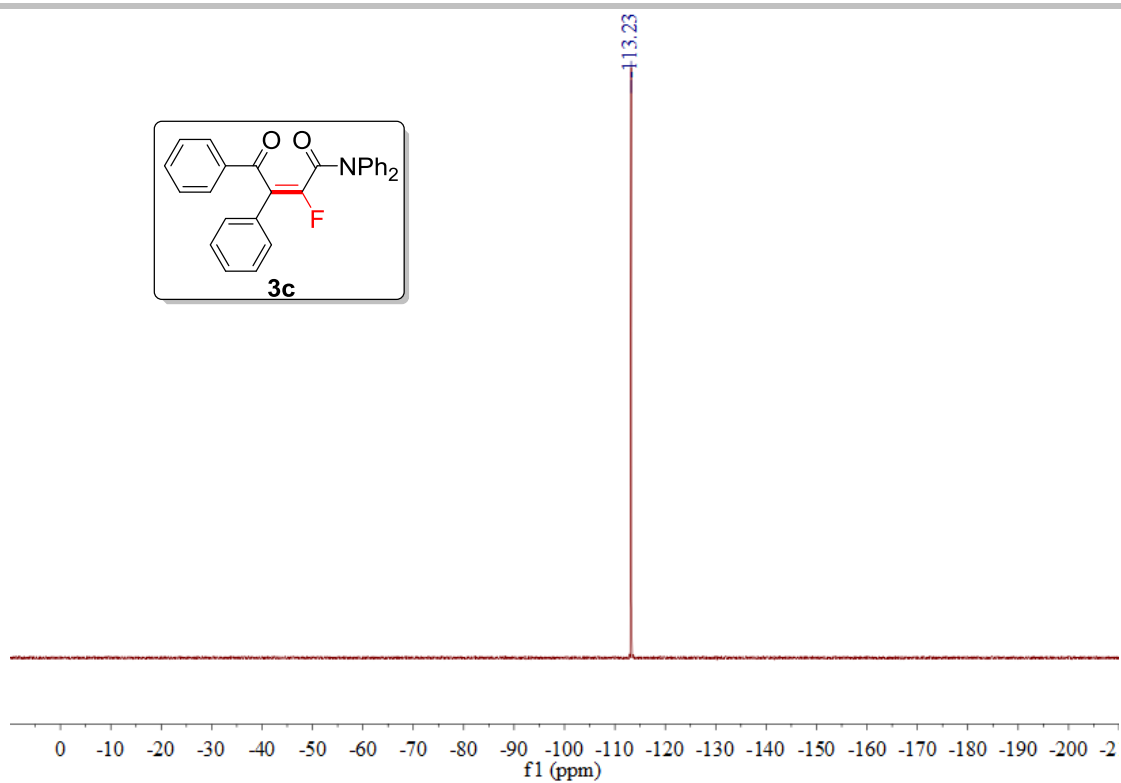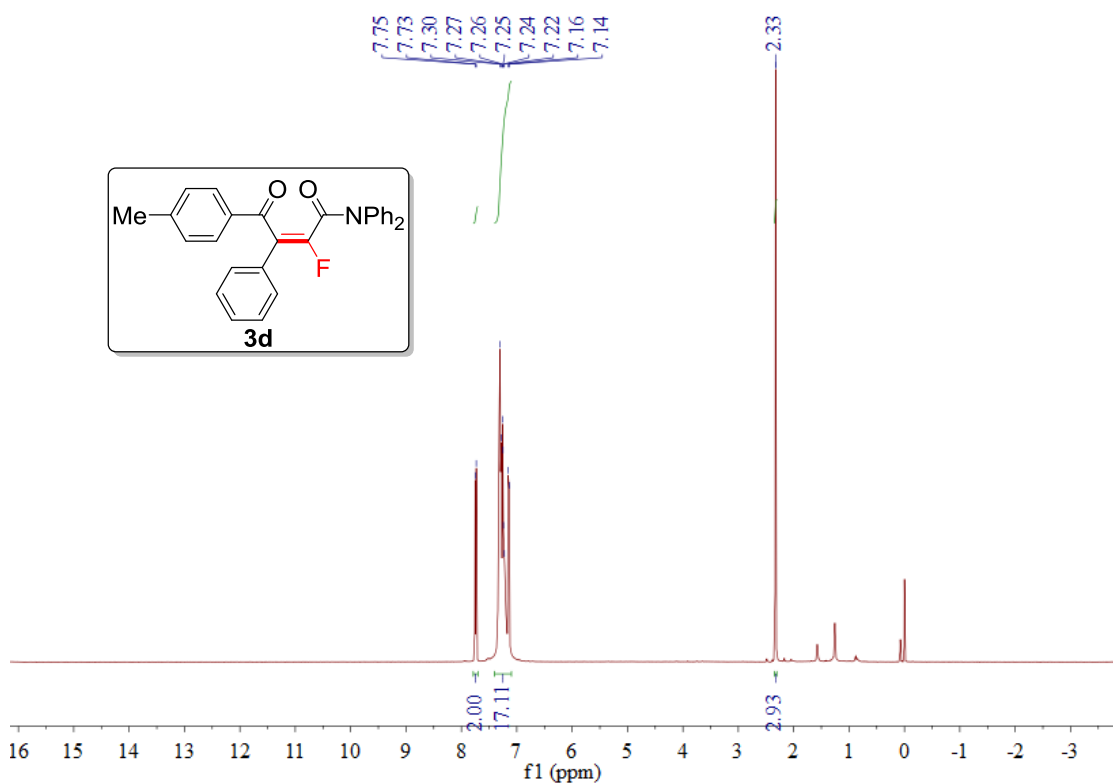

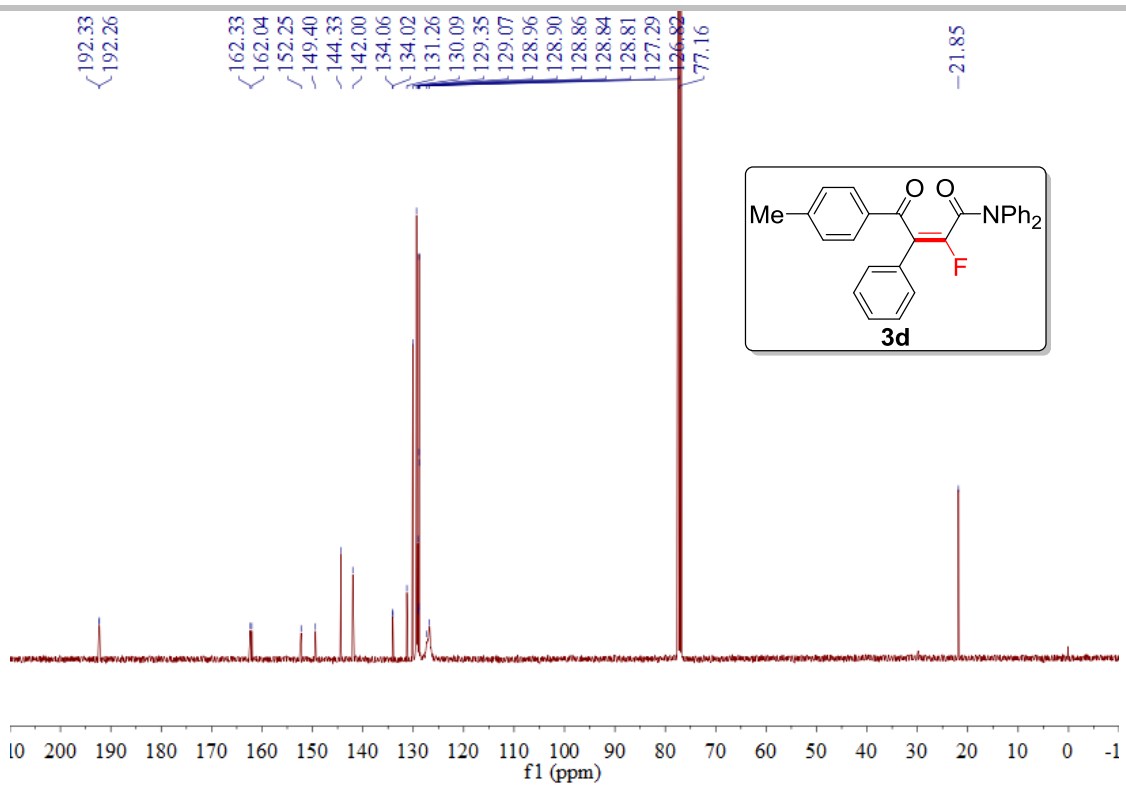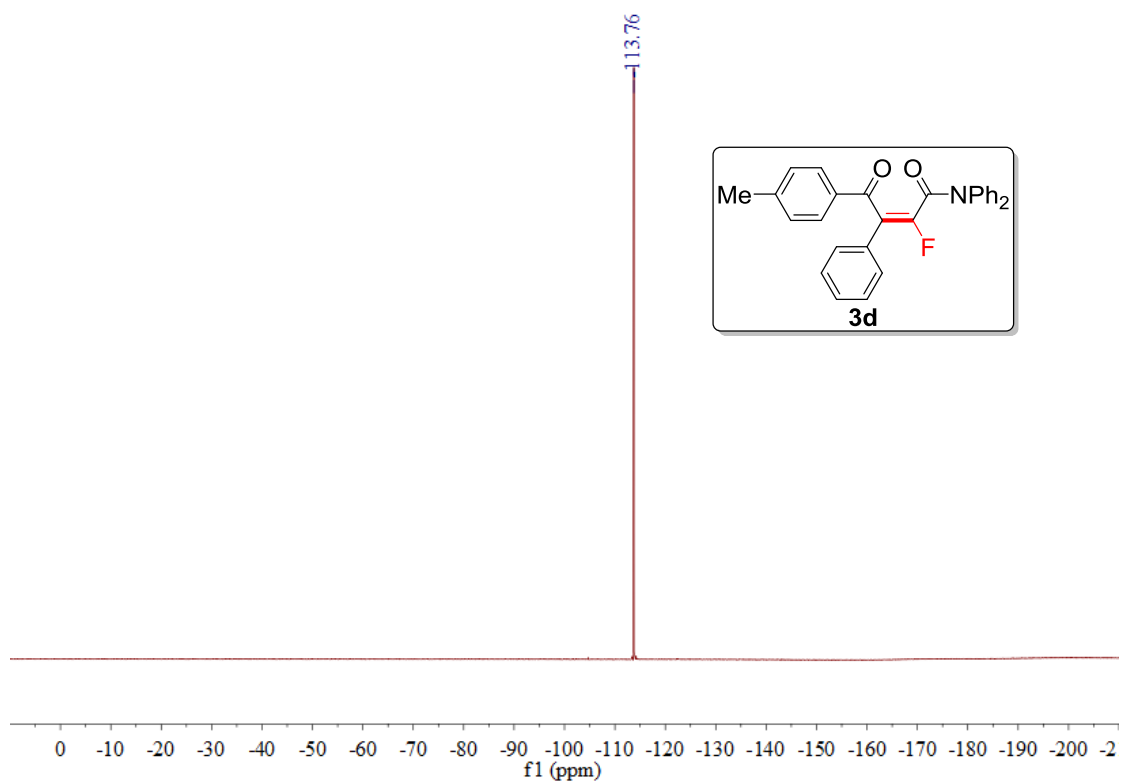

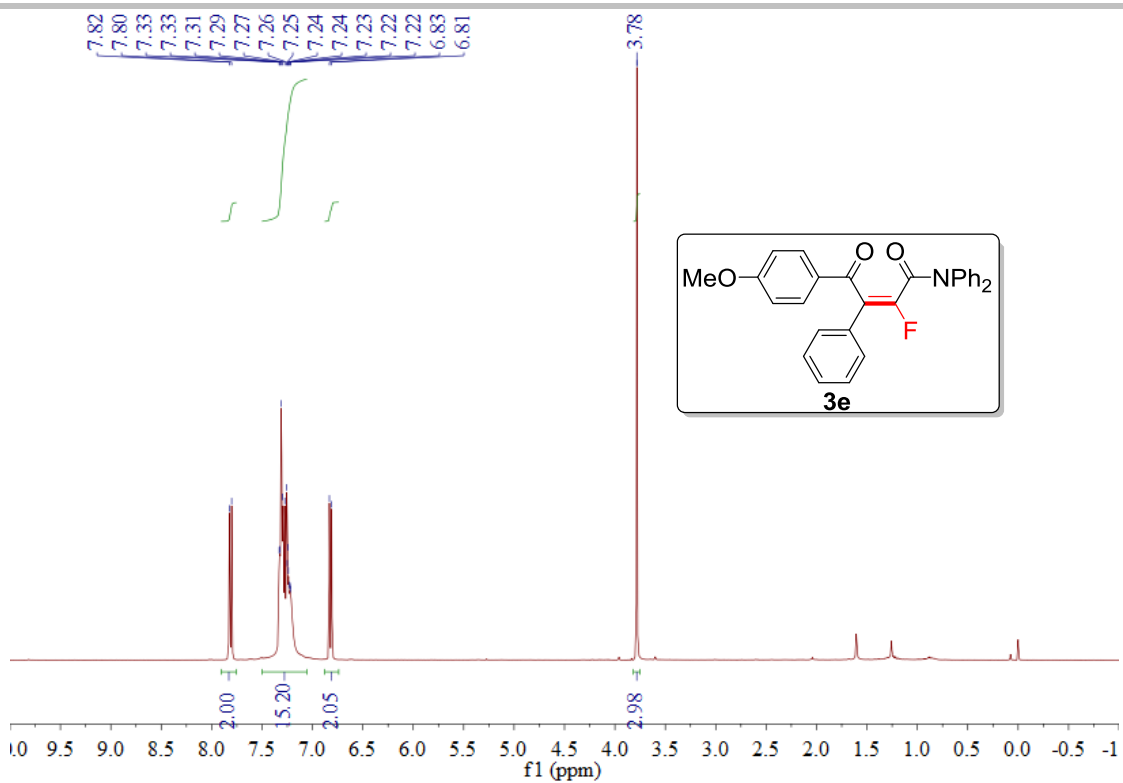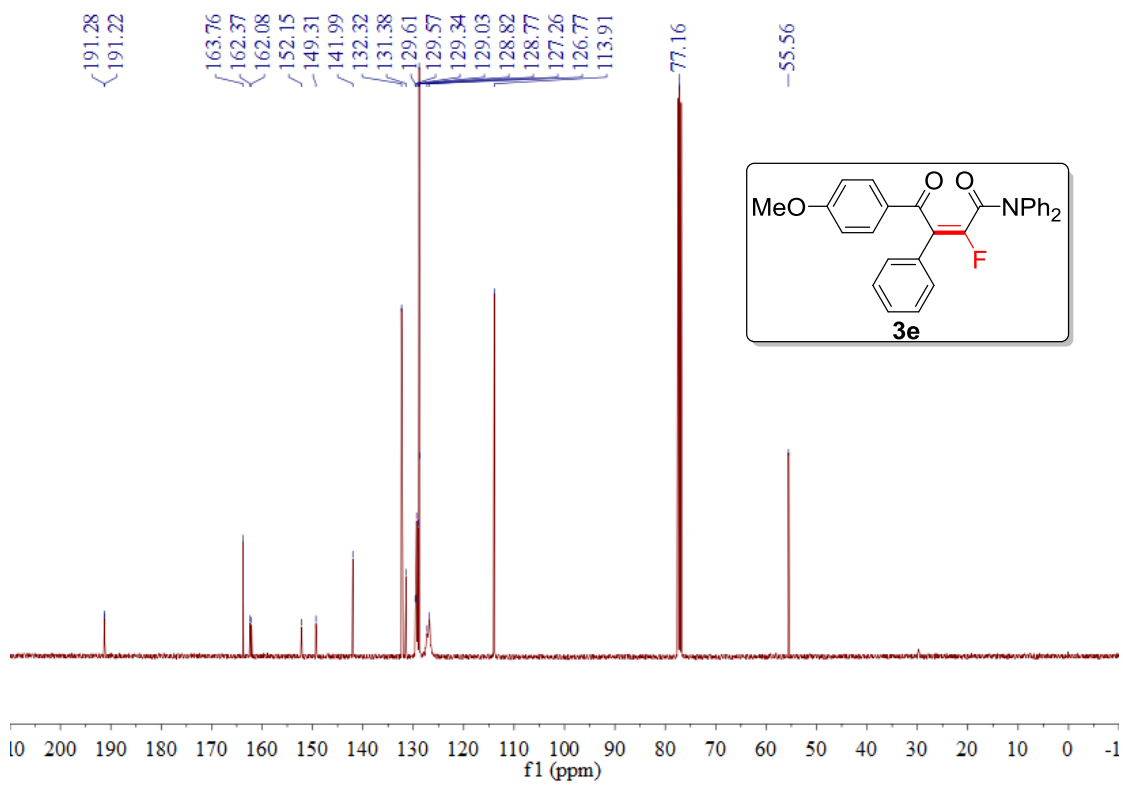

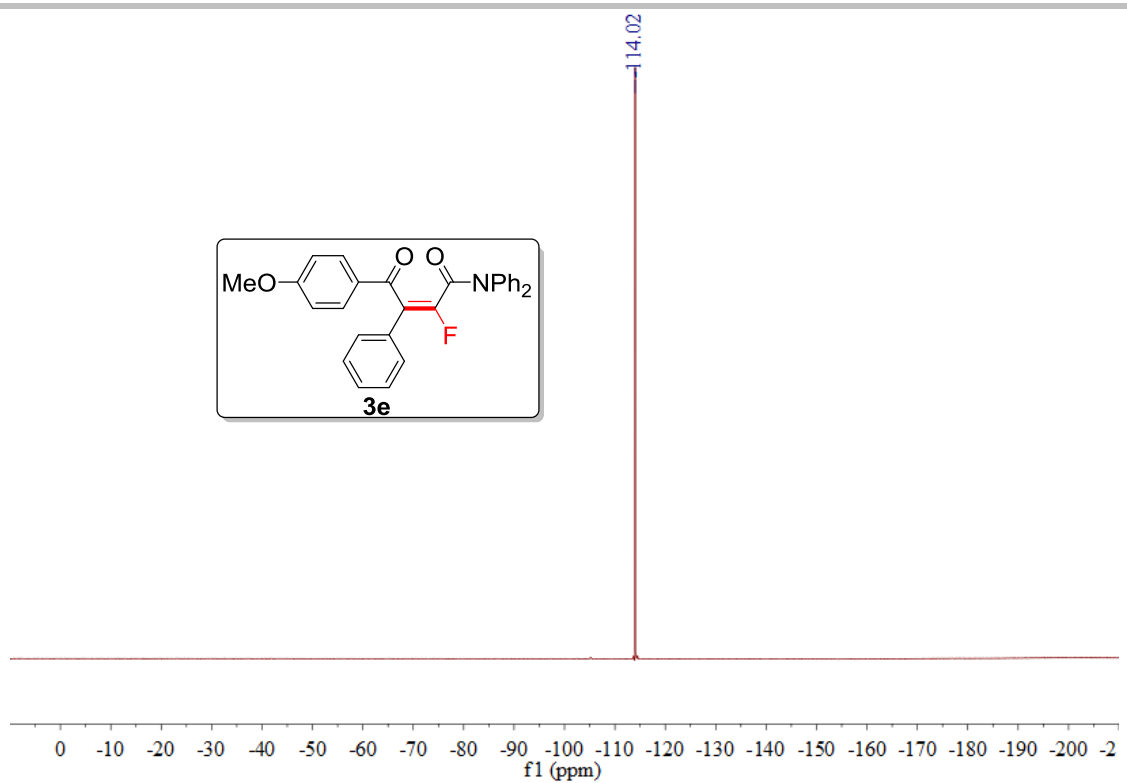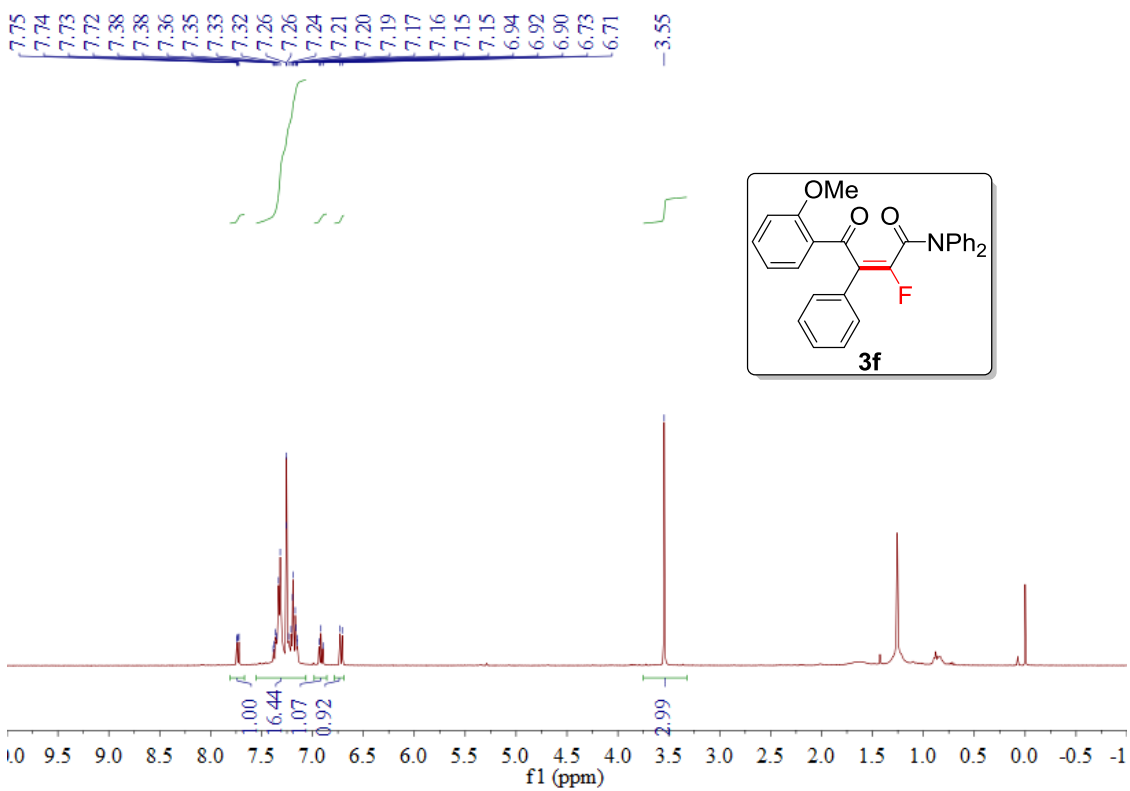

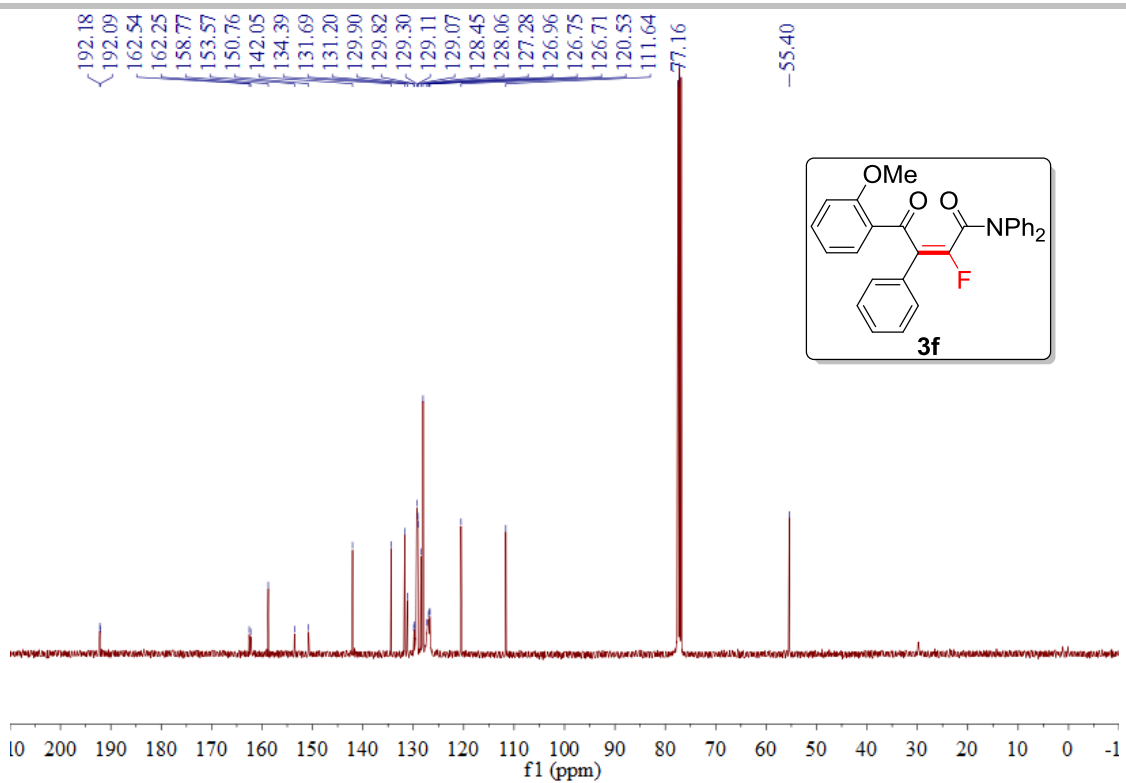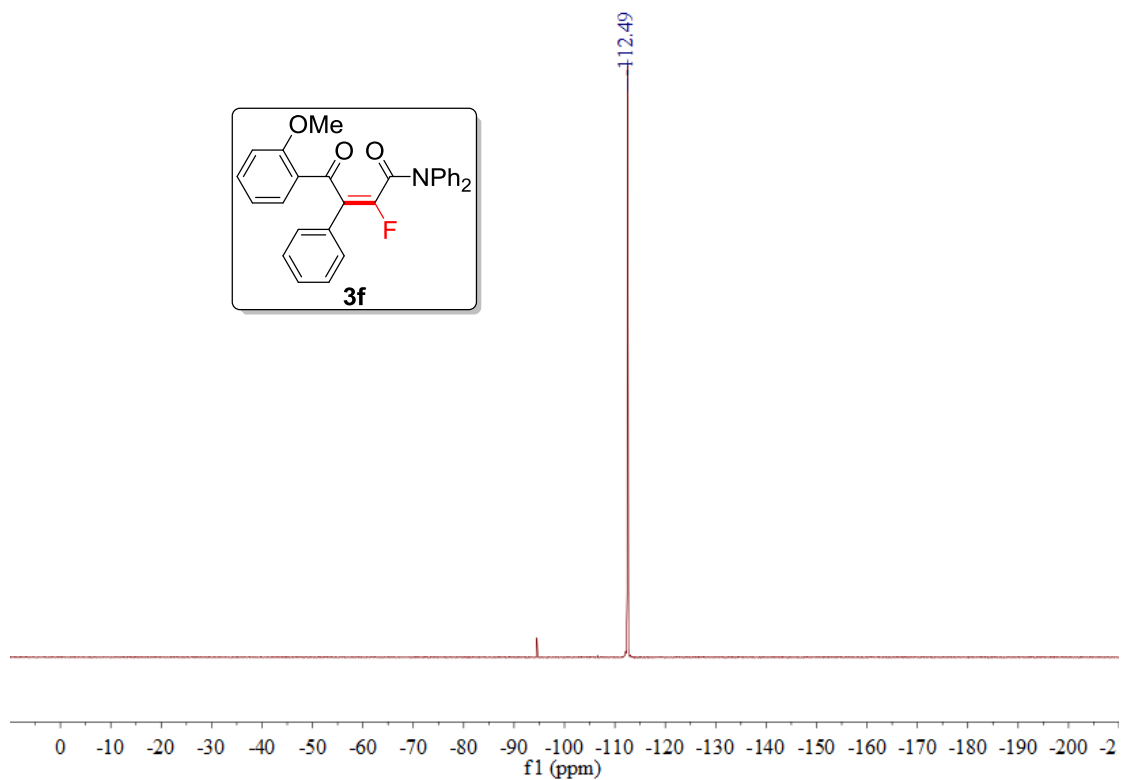



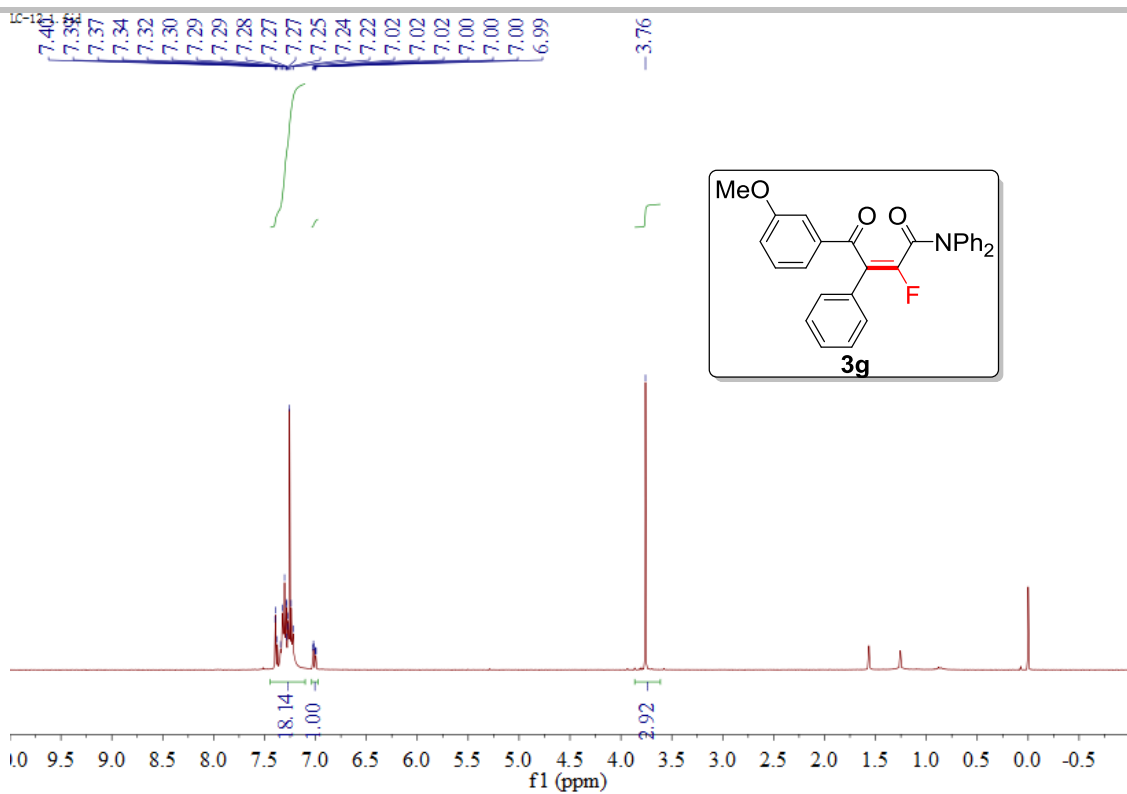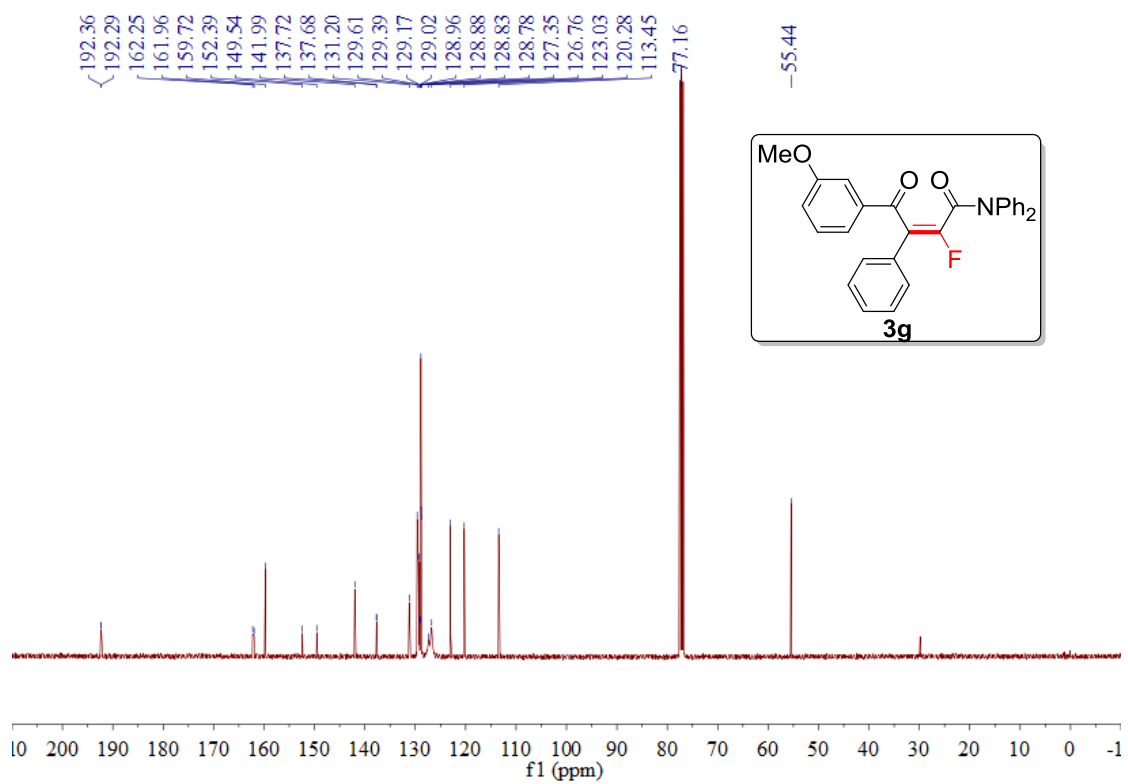

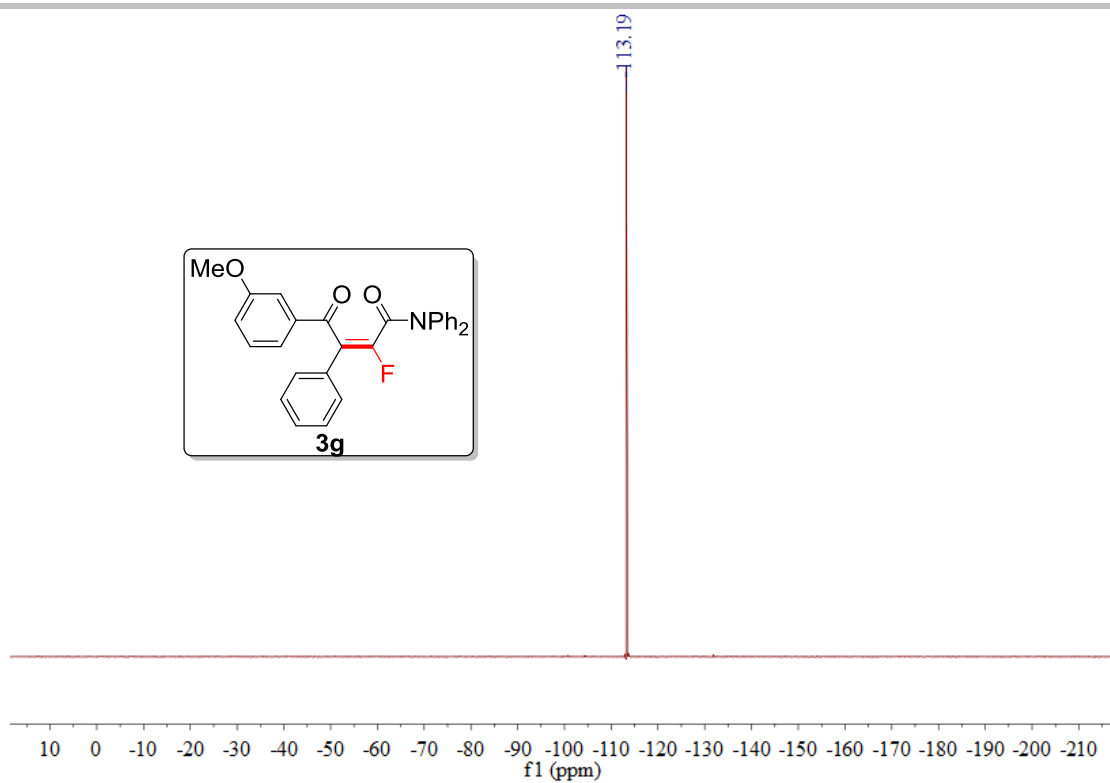

7.93  
7.91  
7.88  
7.56  
7.54  
7.45  
7.43  
7.41  
7.38  
7.37  
7.35  
7.33  
7.31  
7.29  
7.27  
7.26

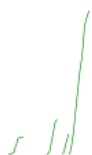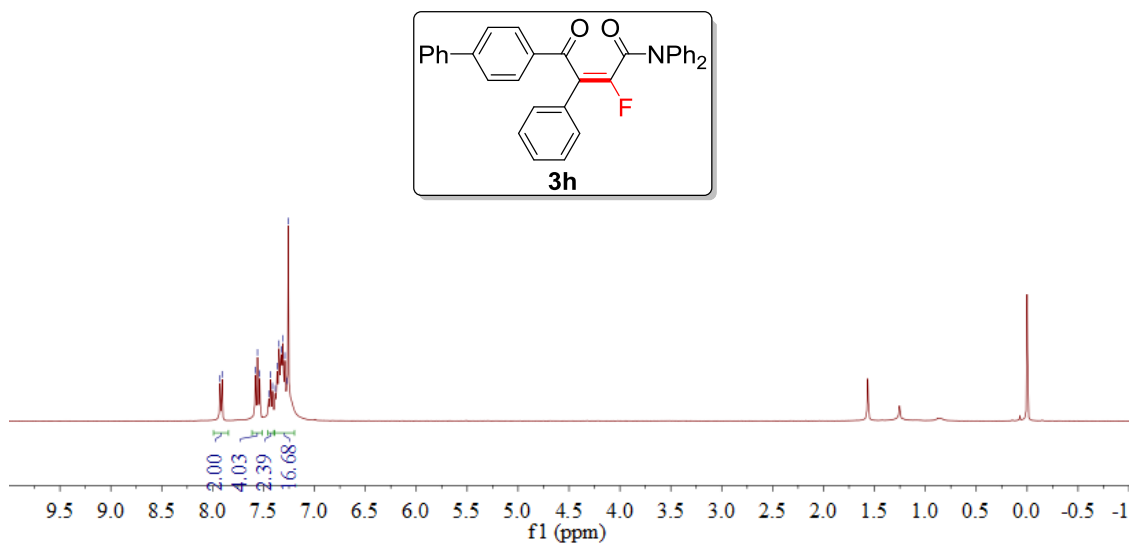

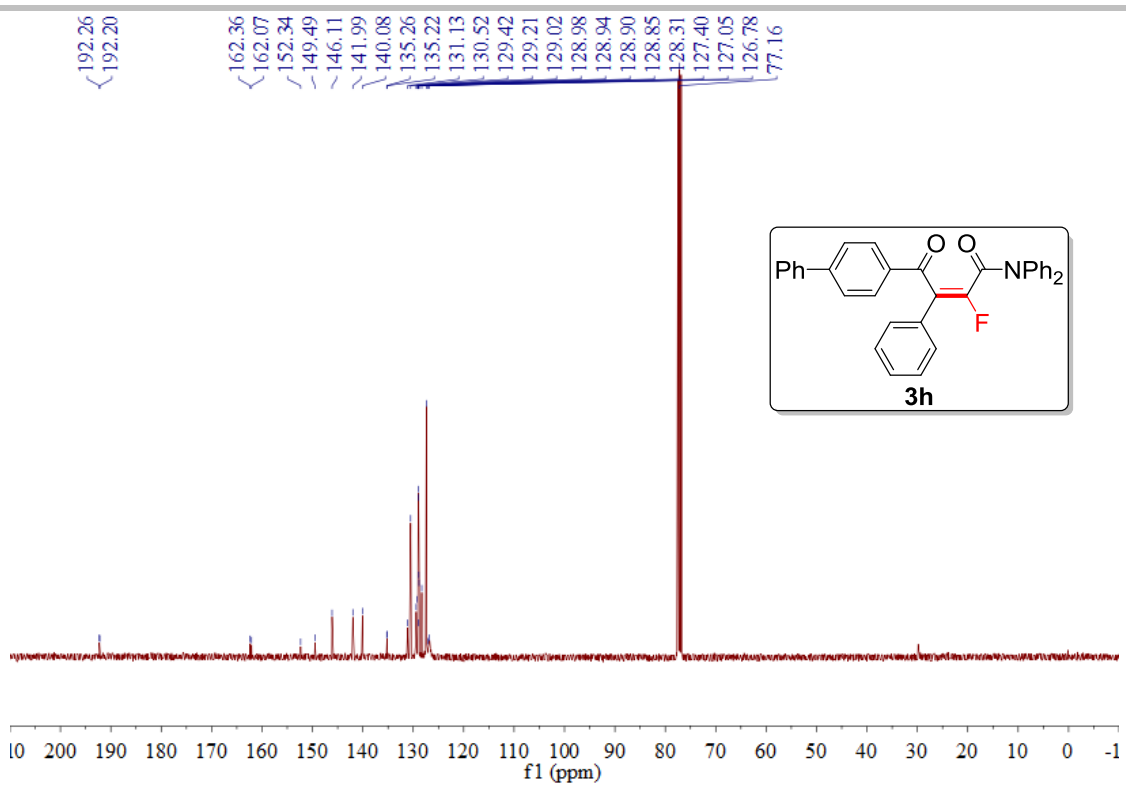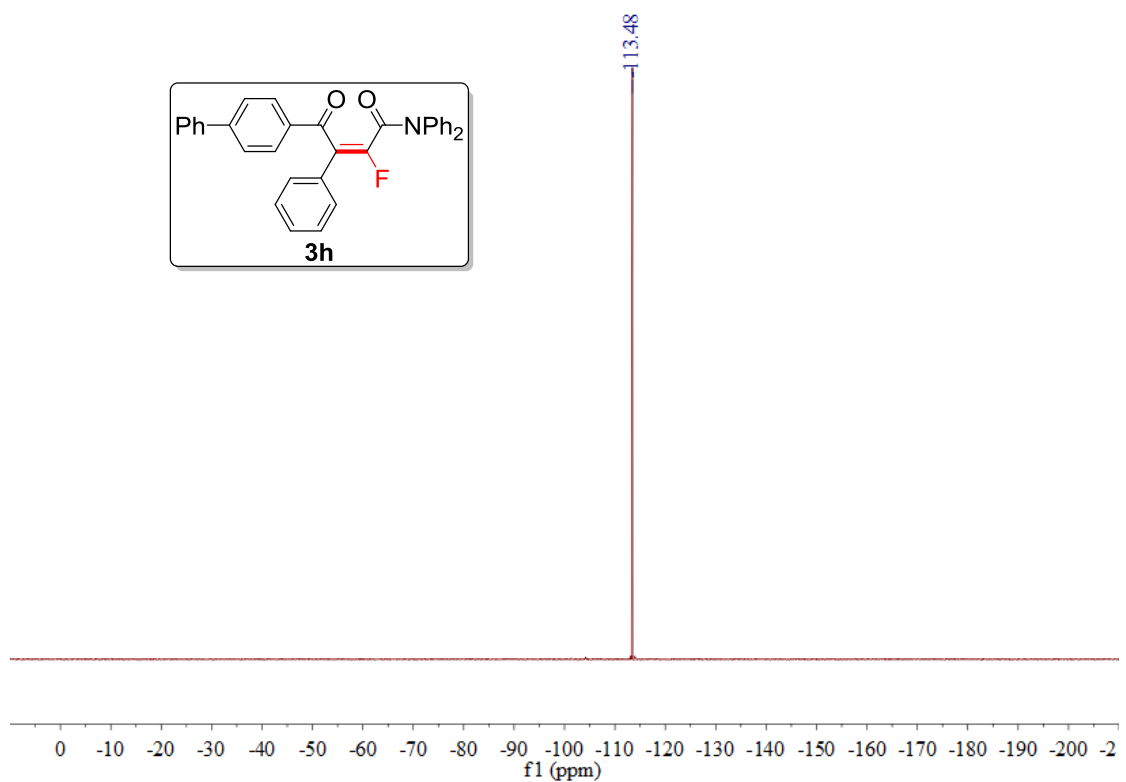

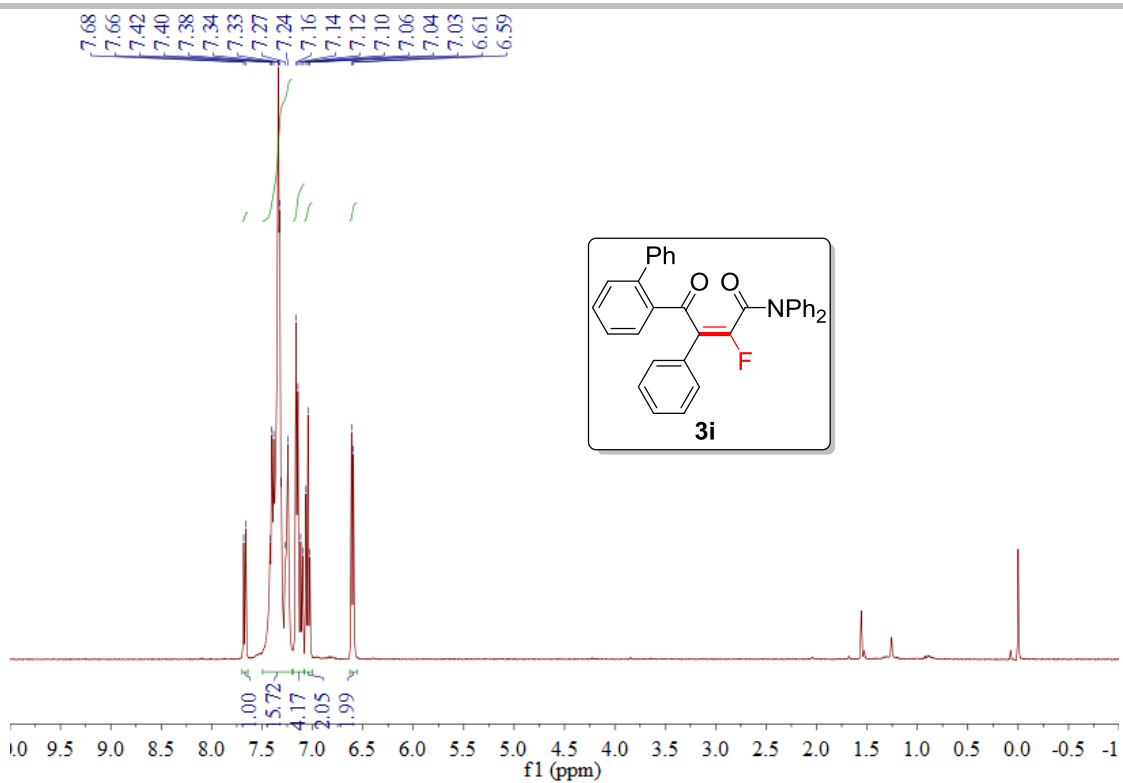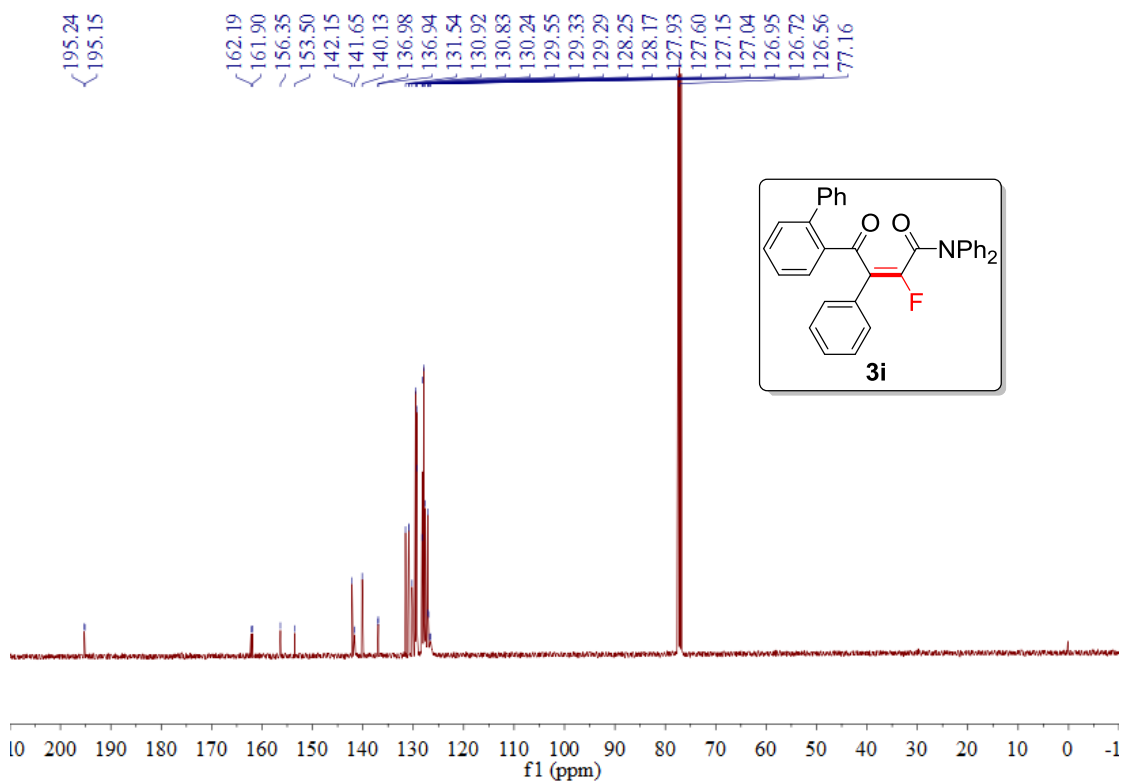

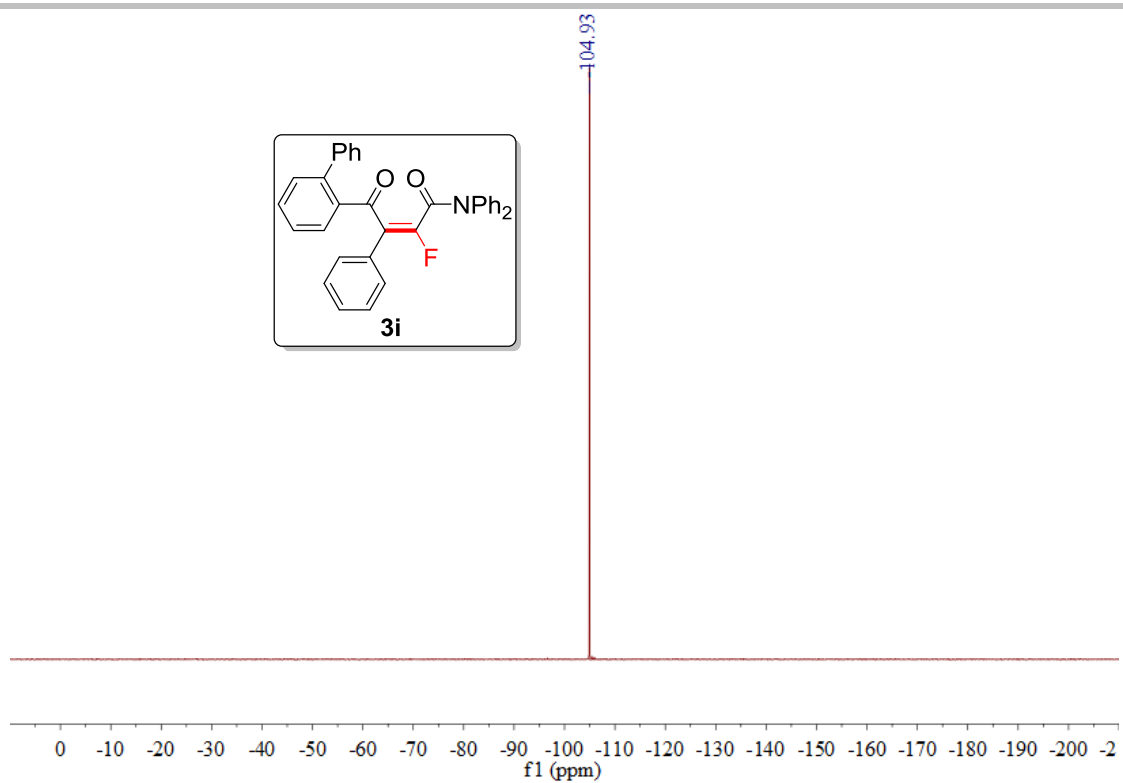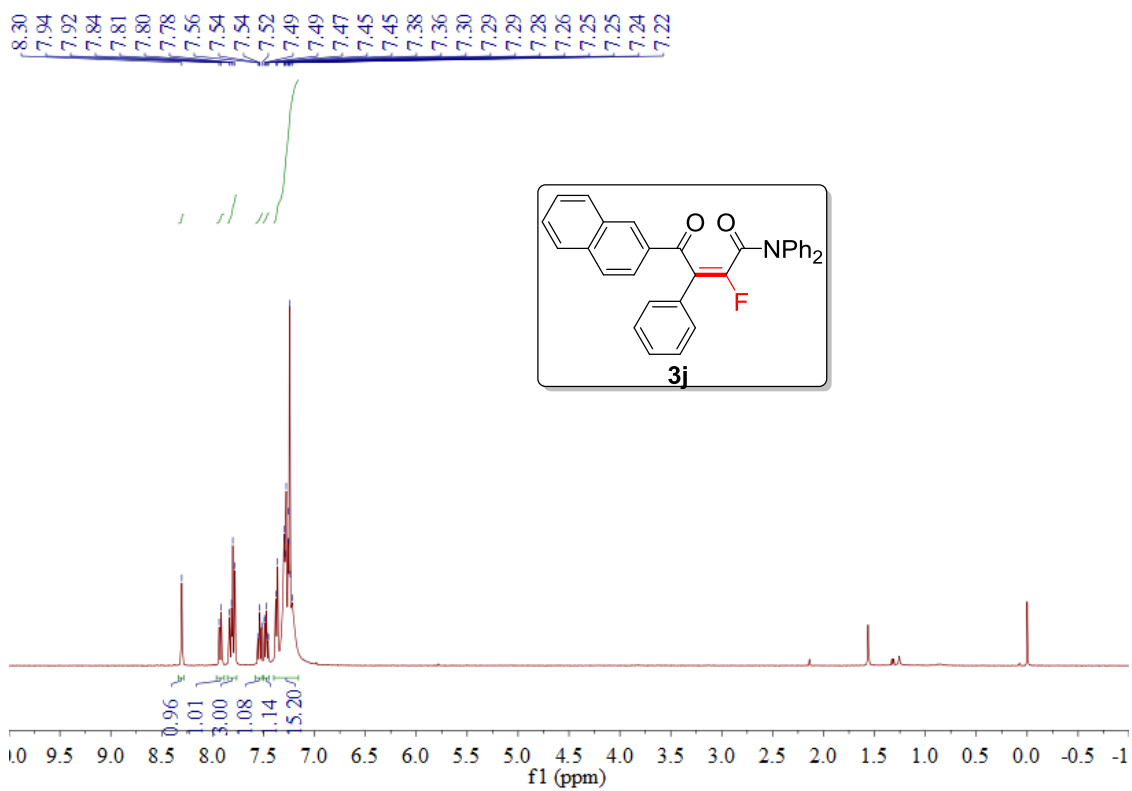

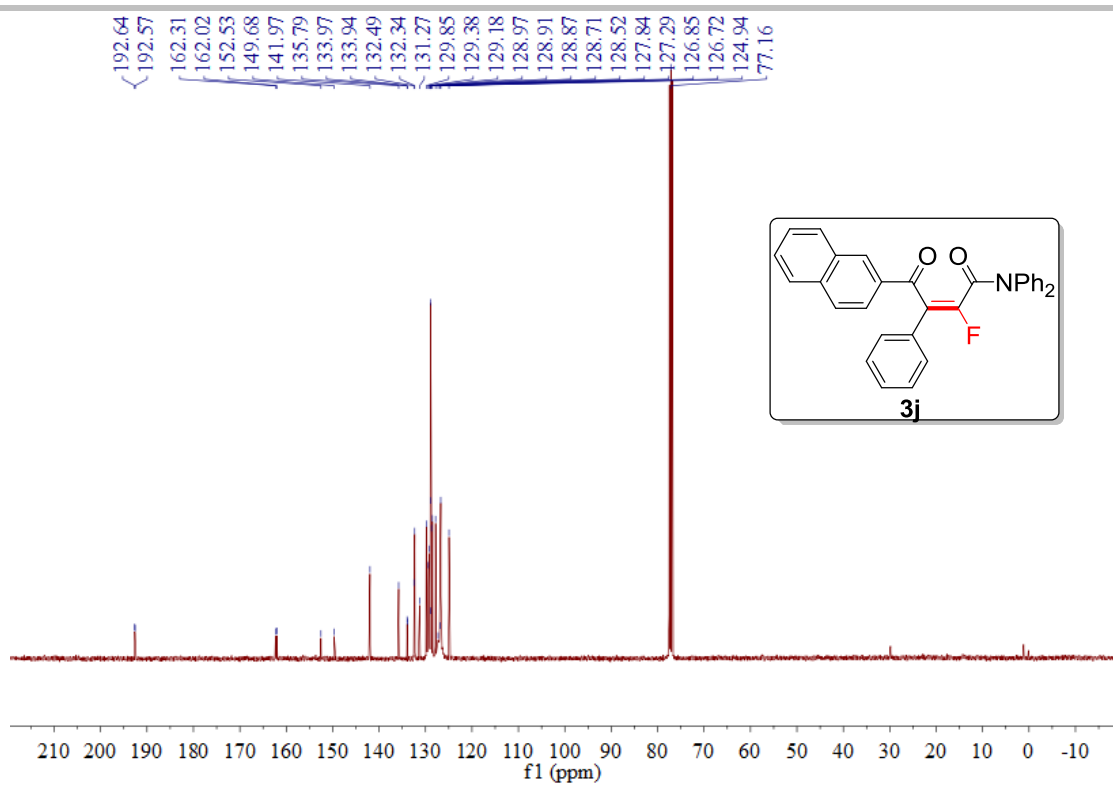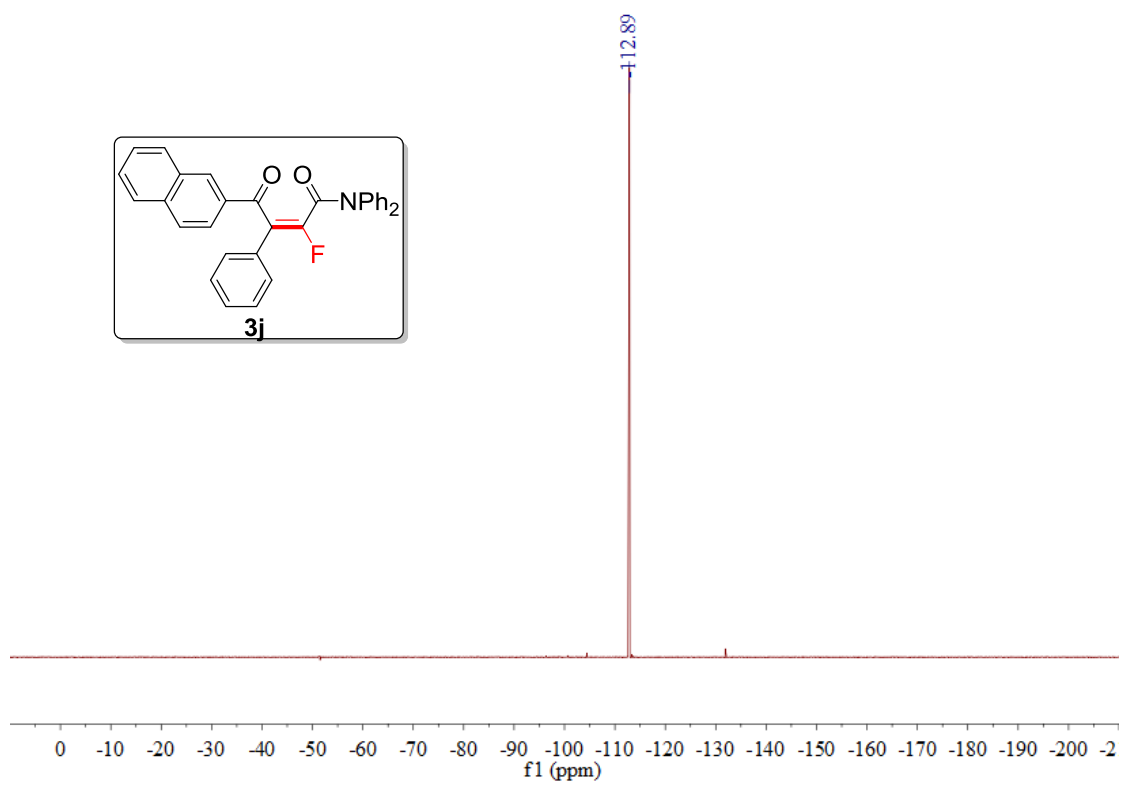

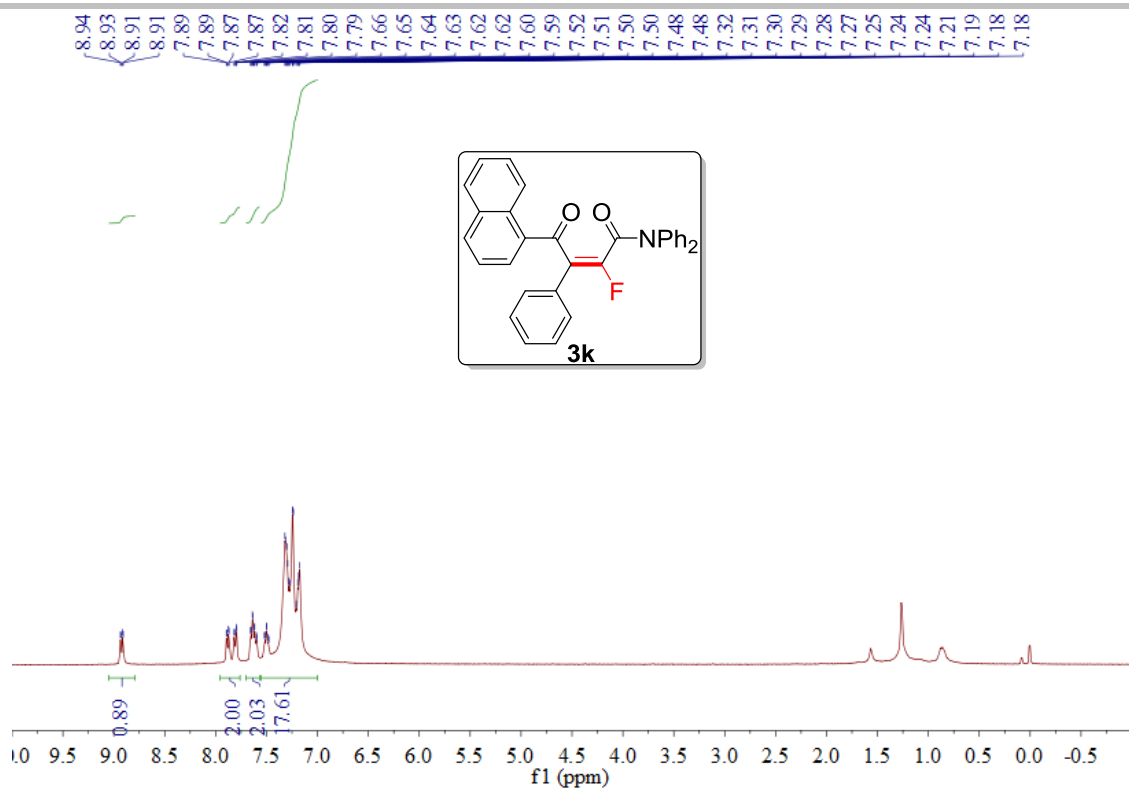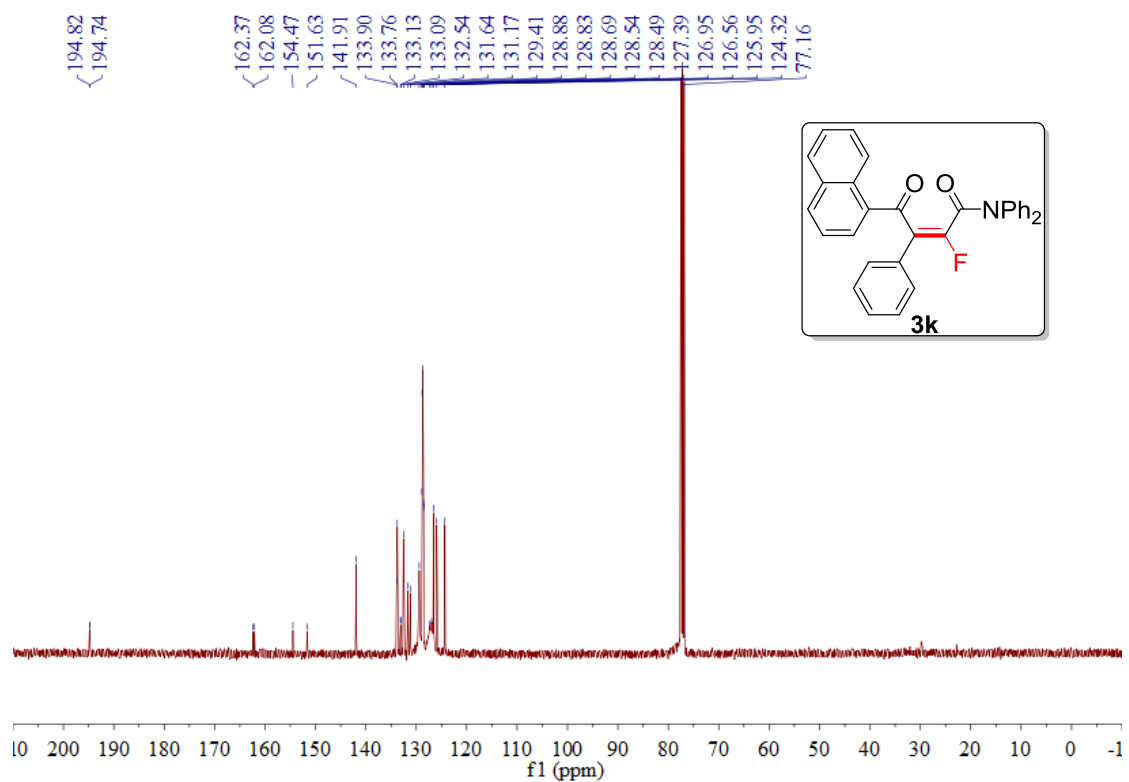

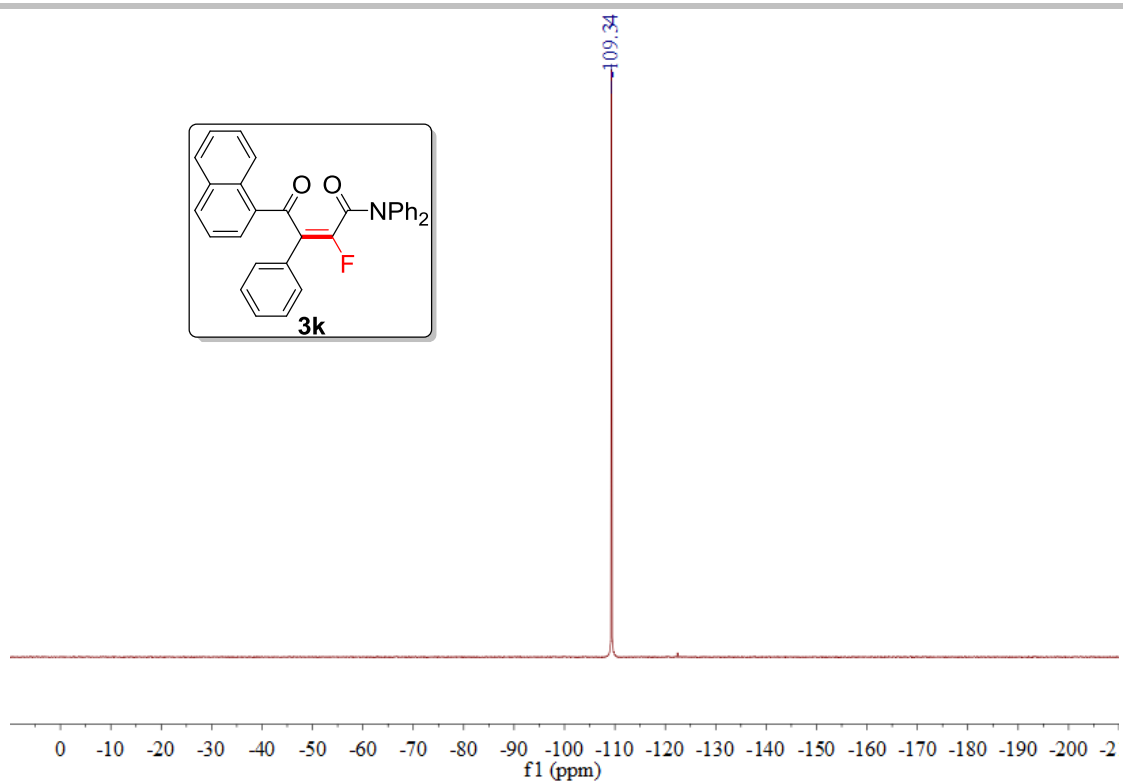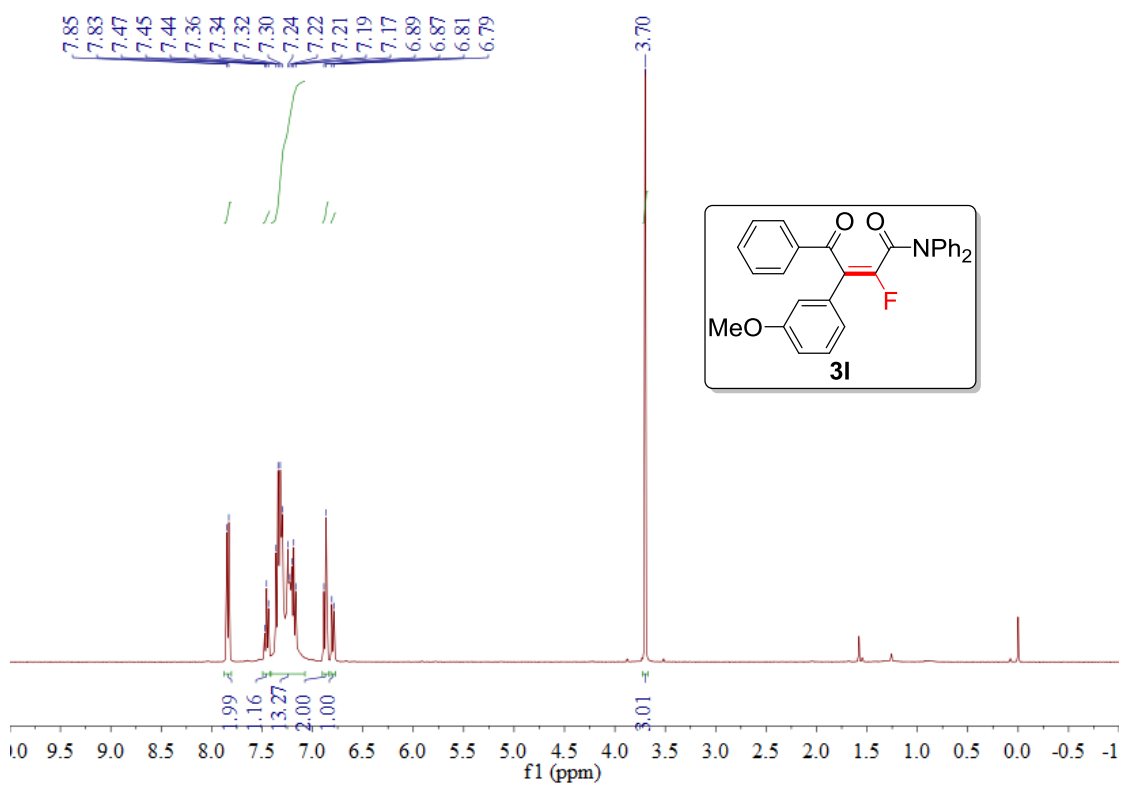



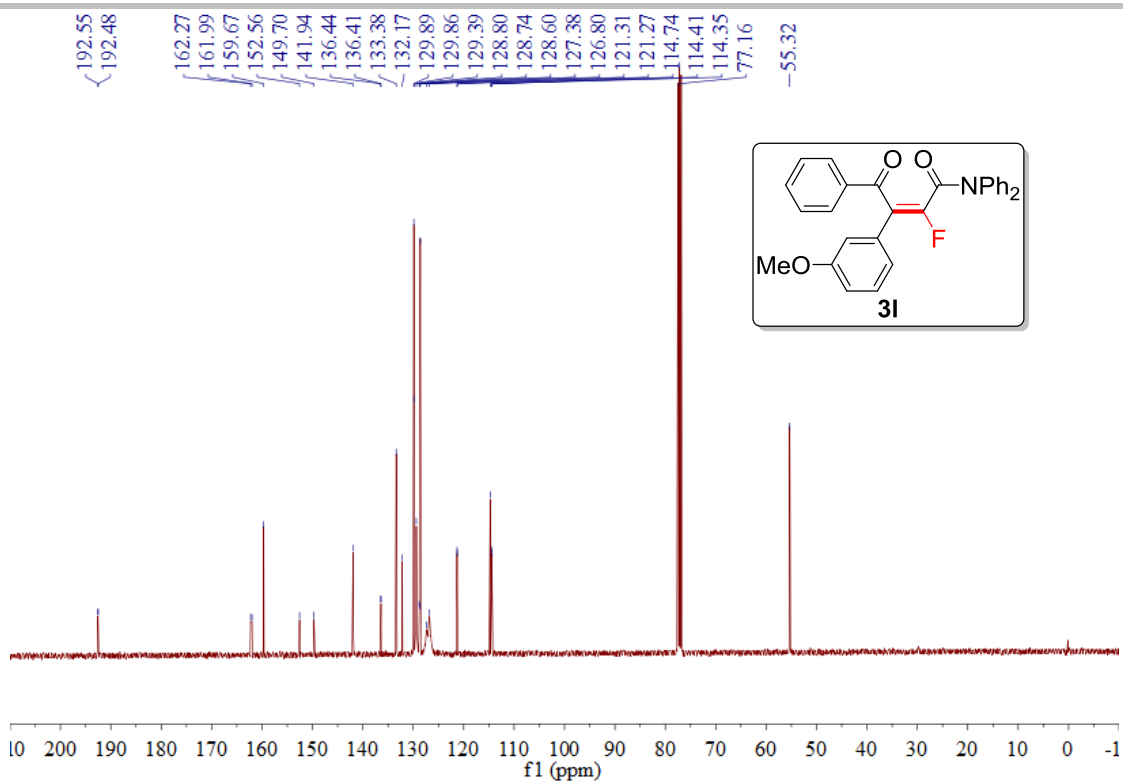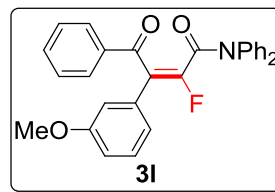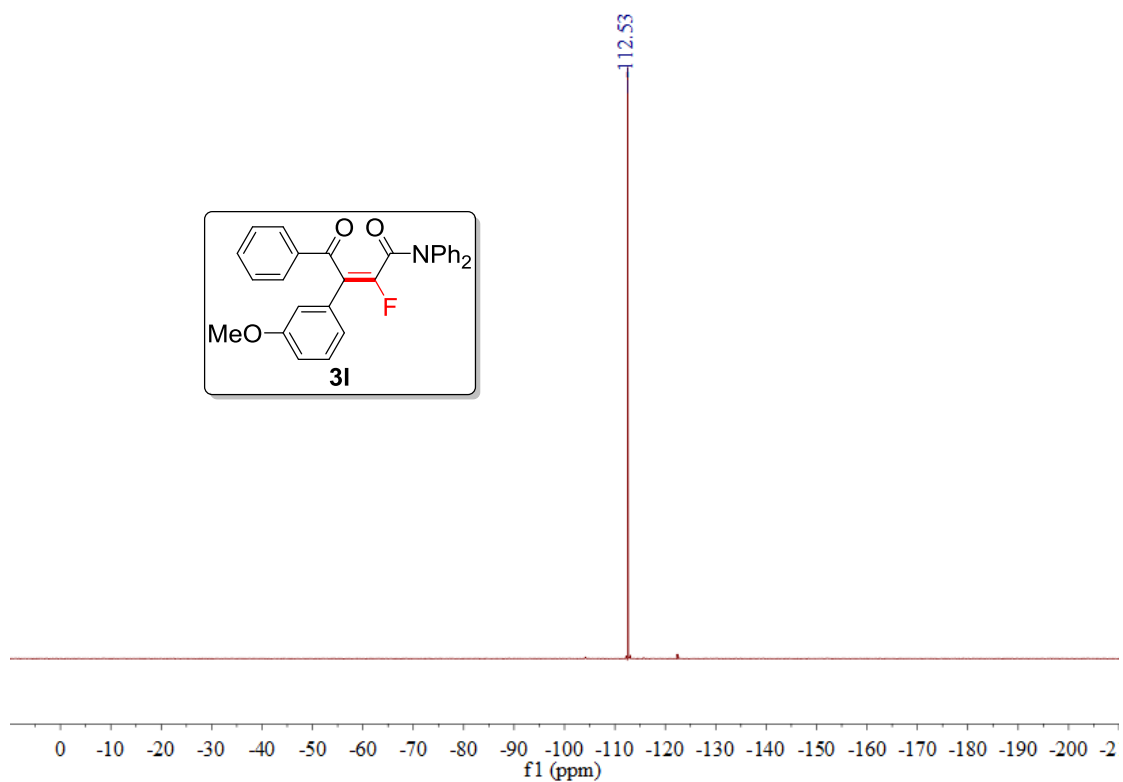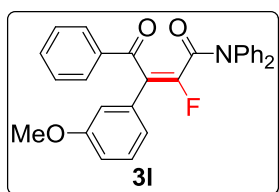

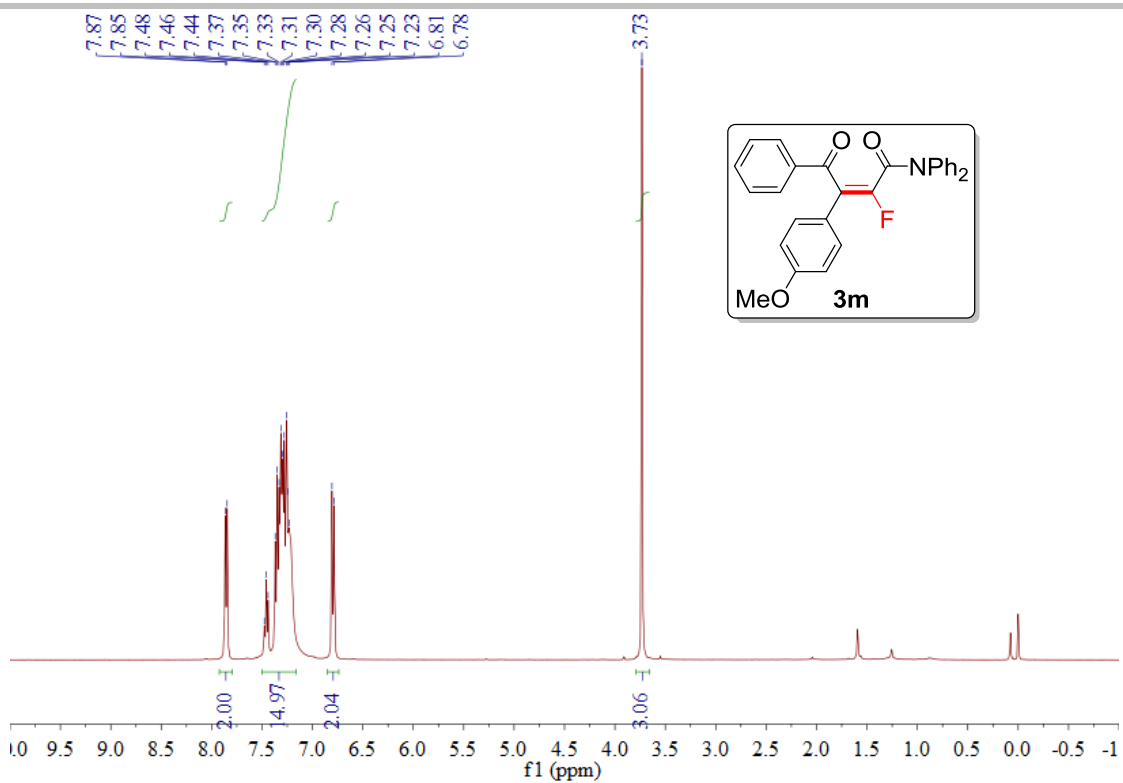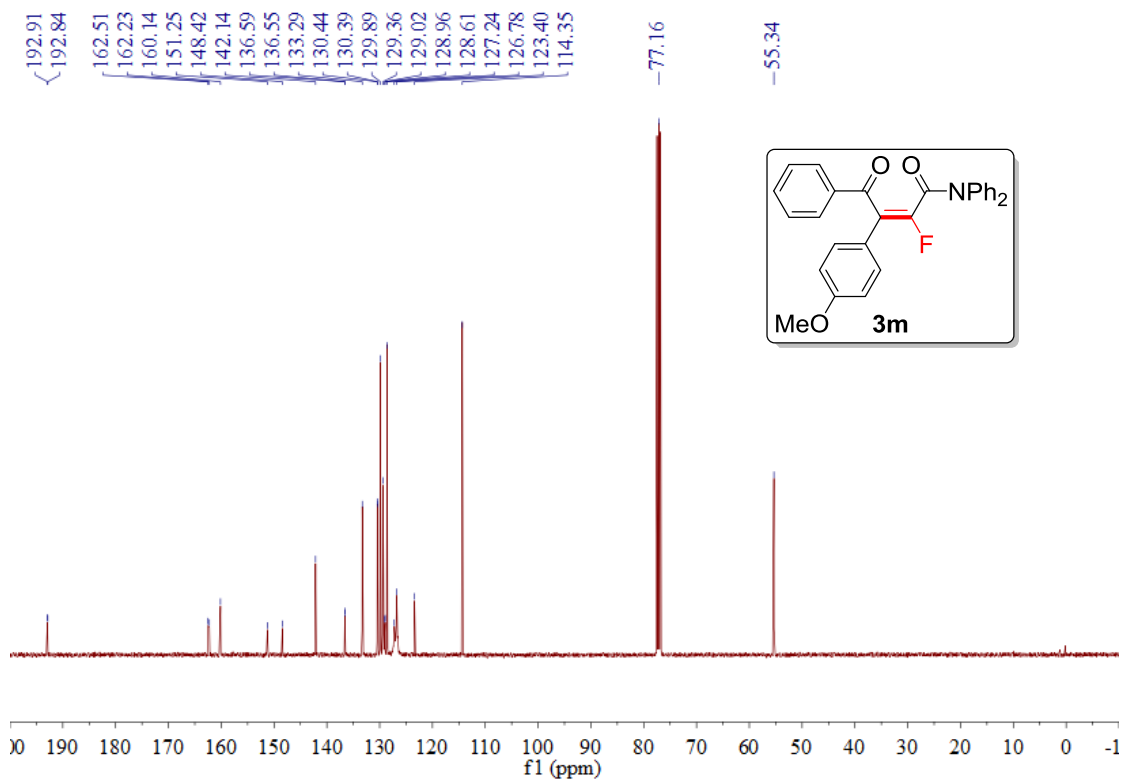

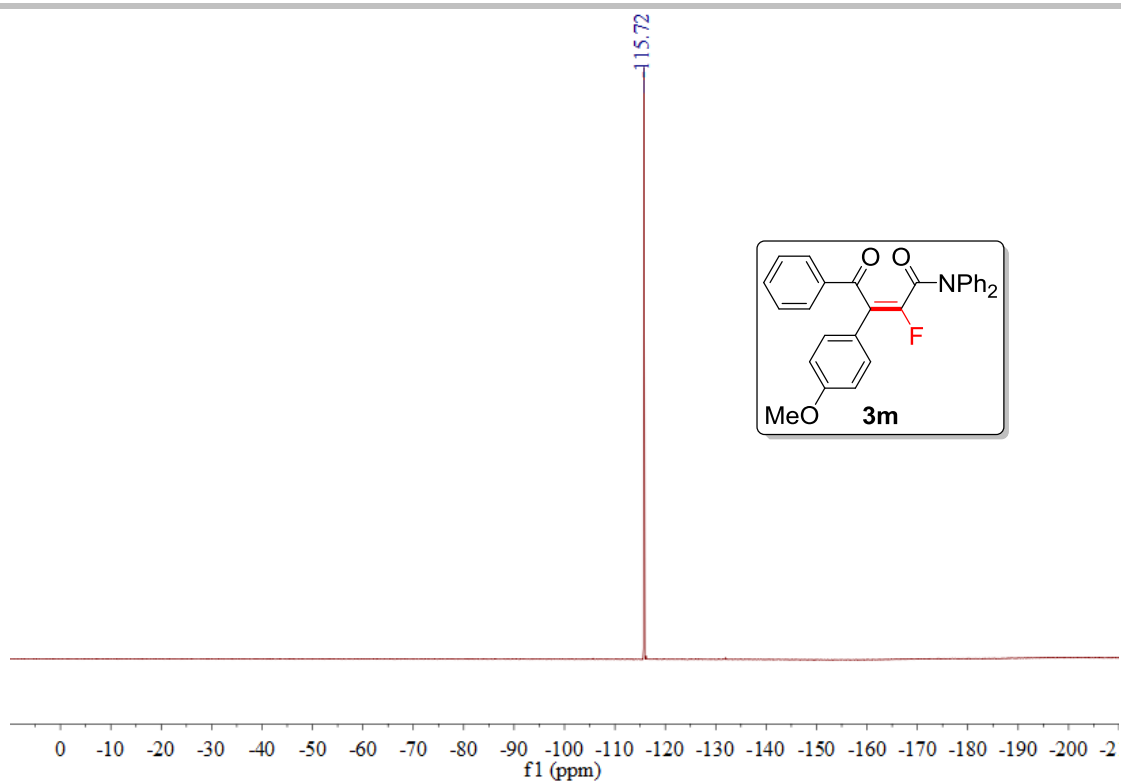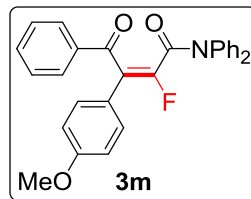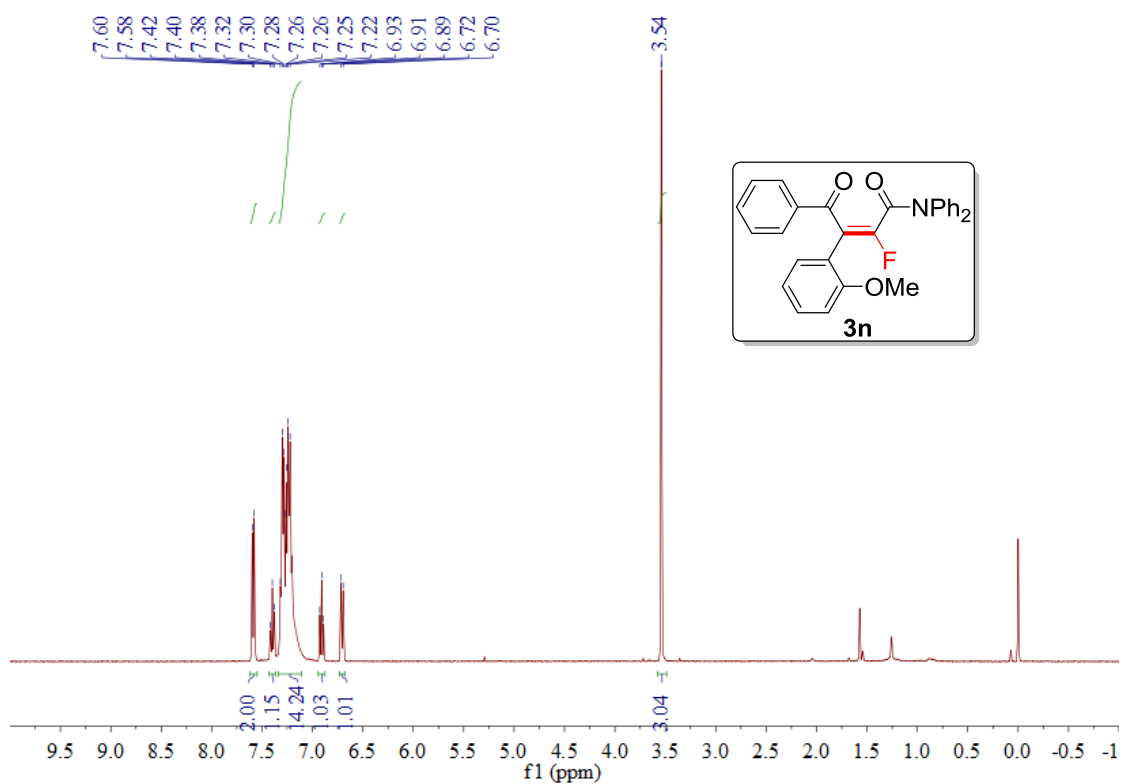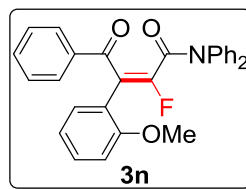

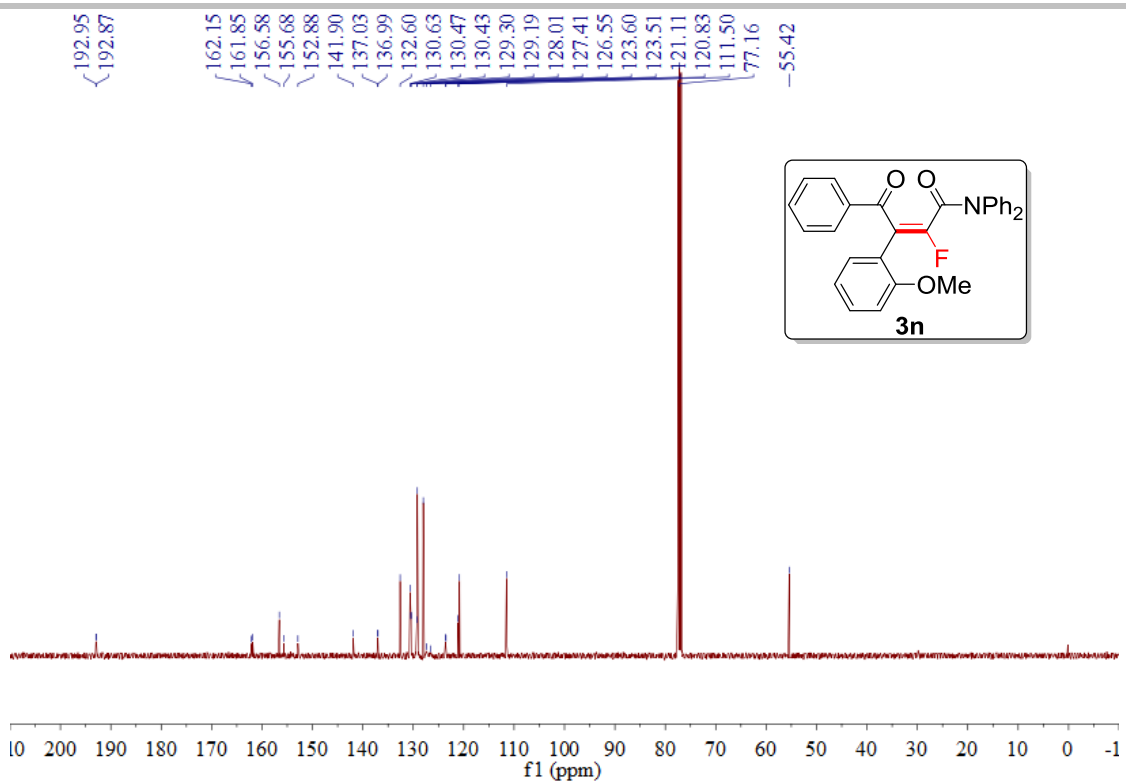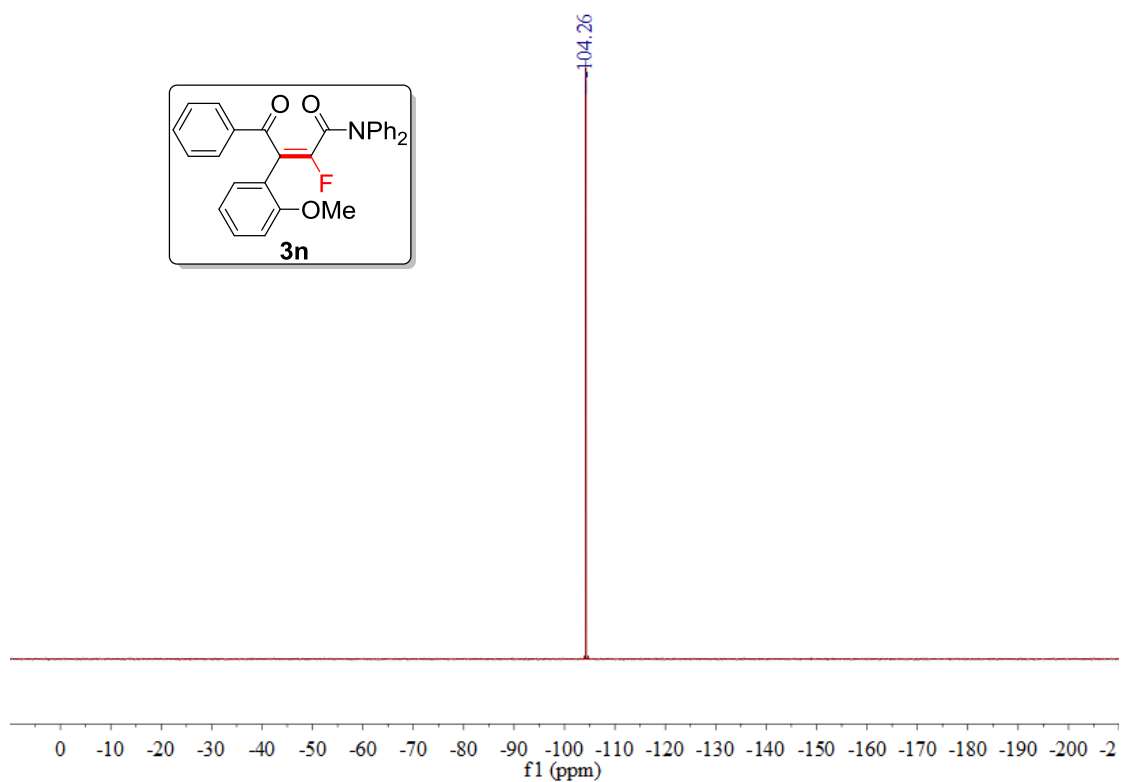

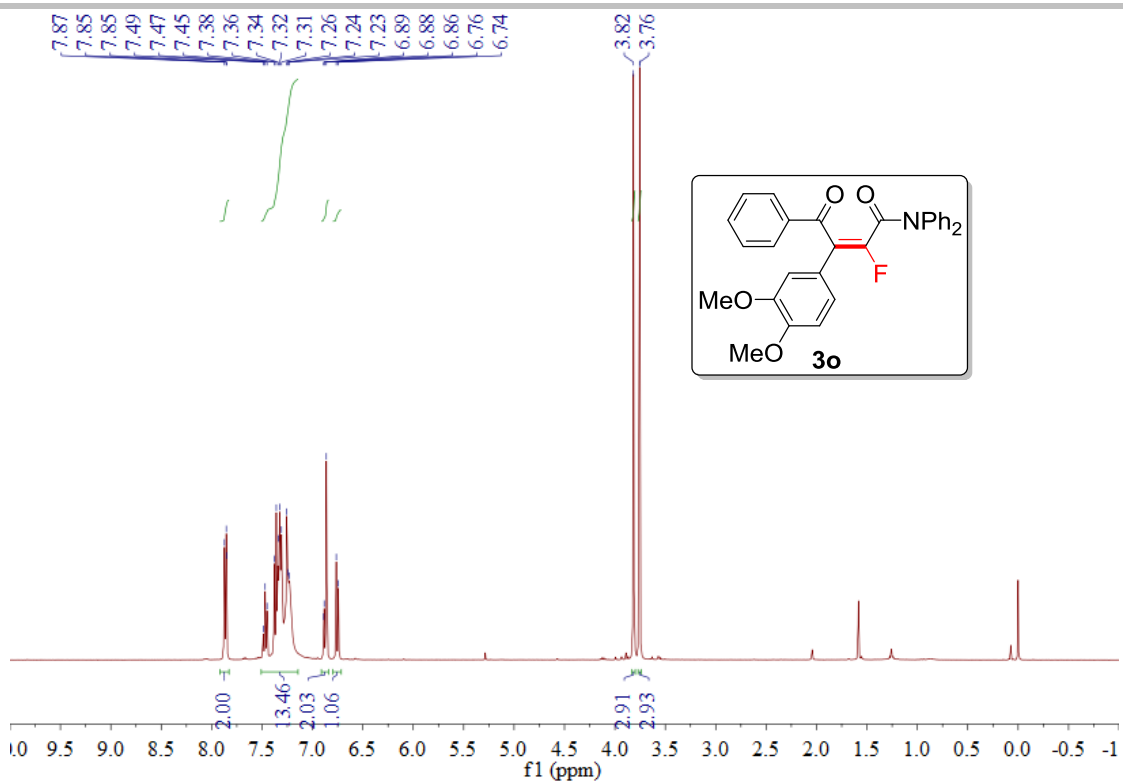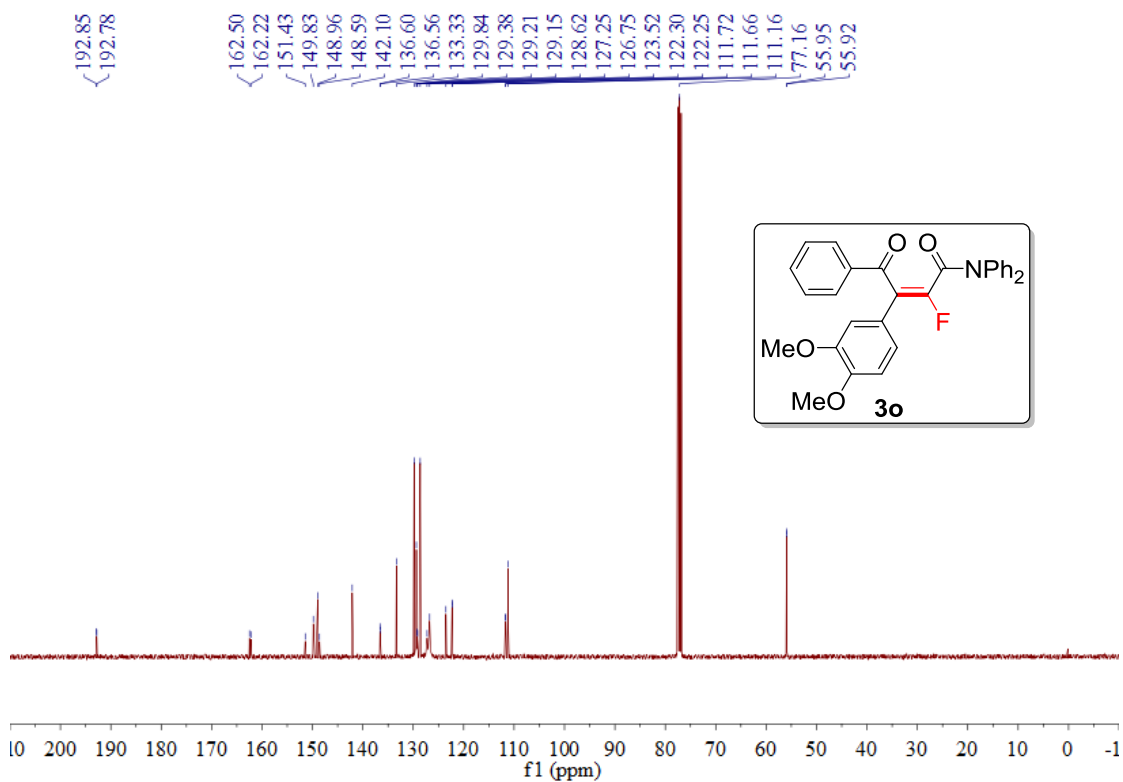

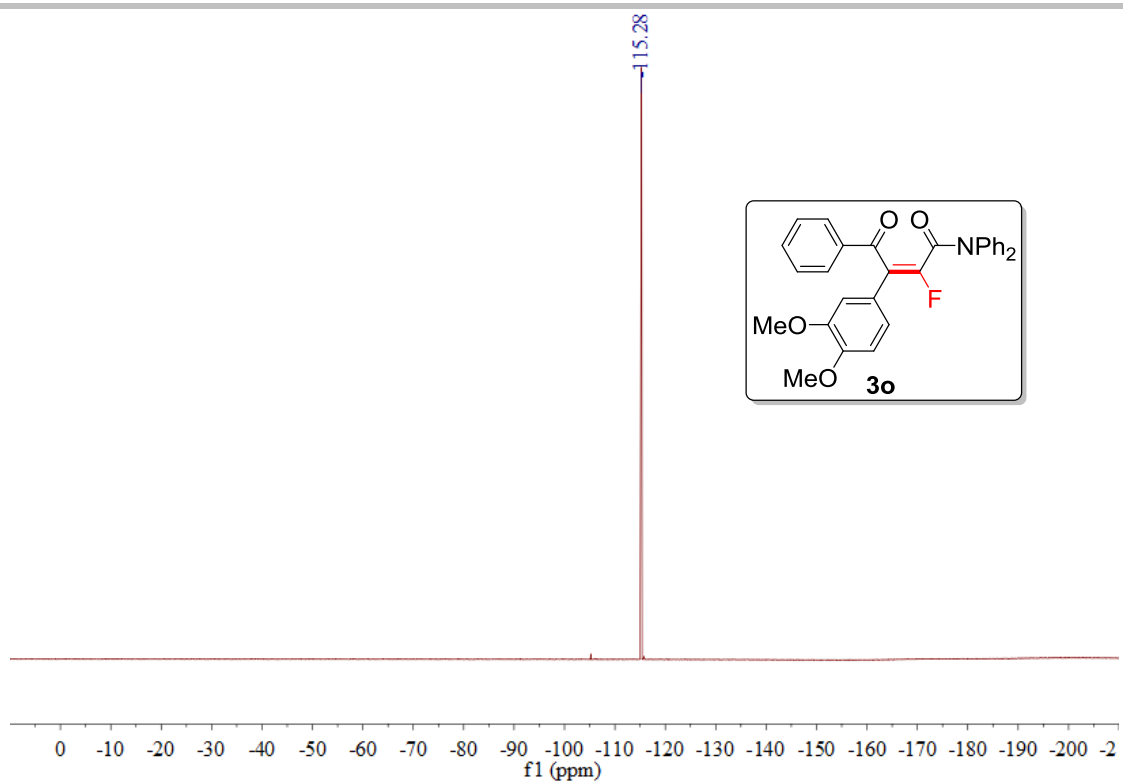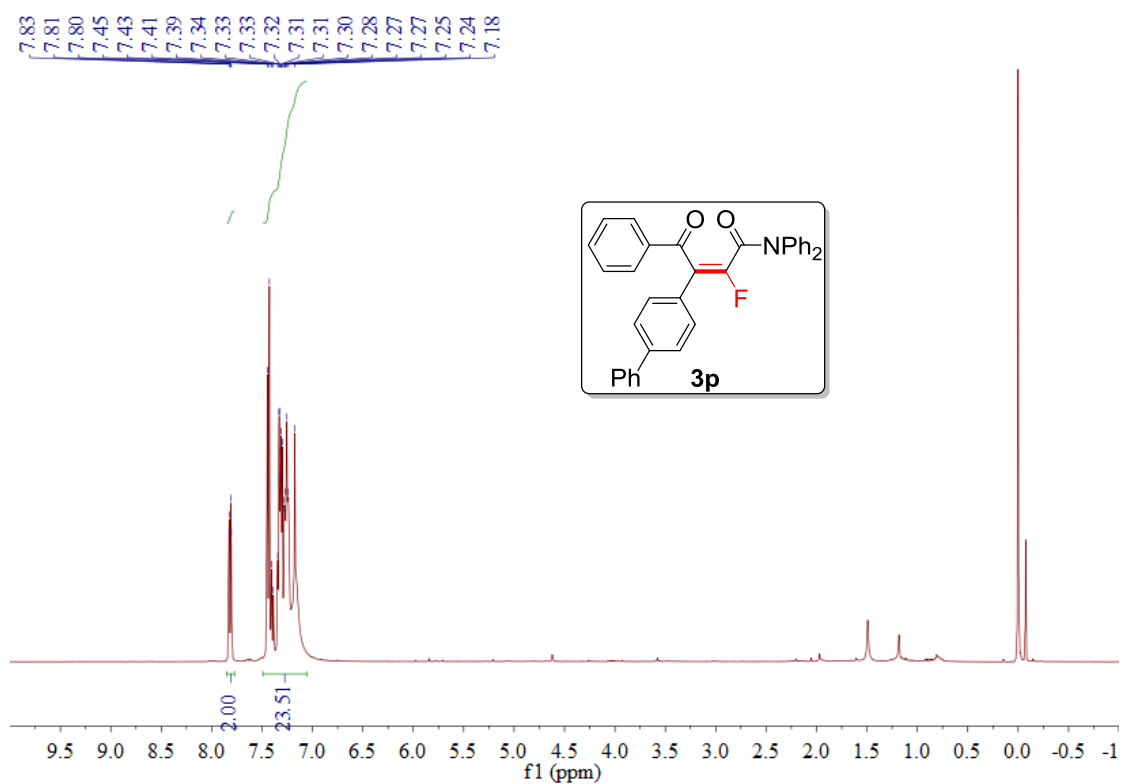

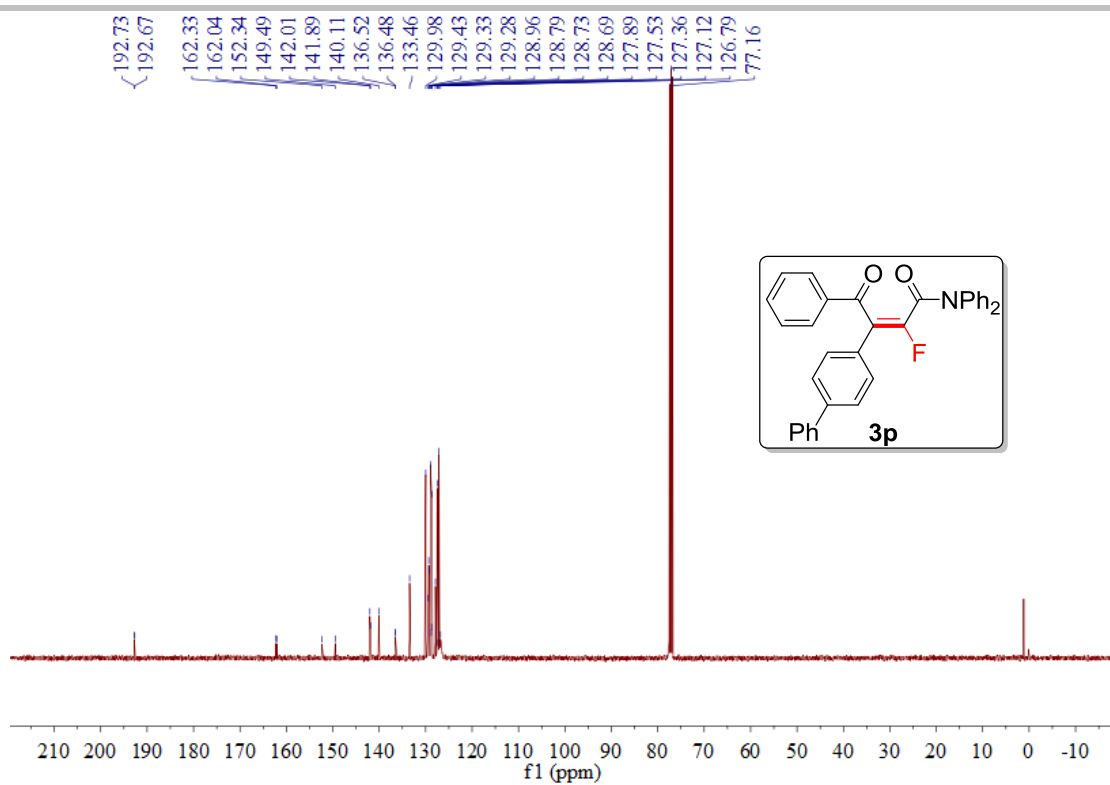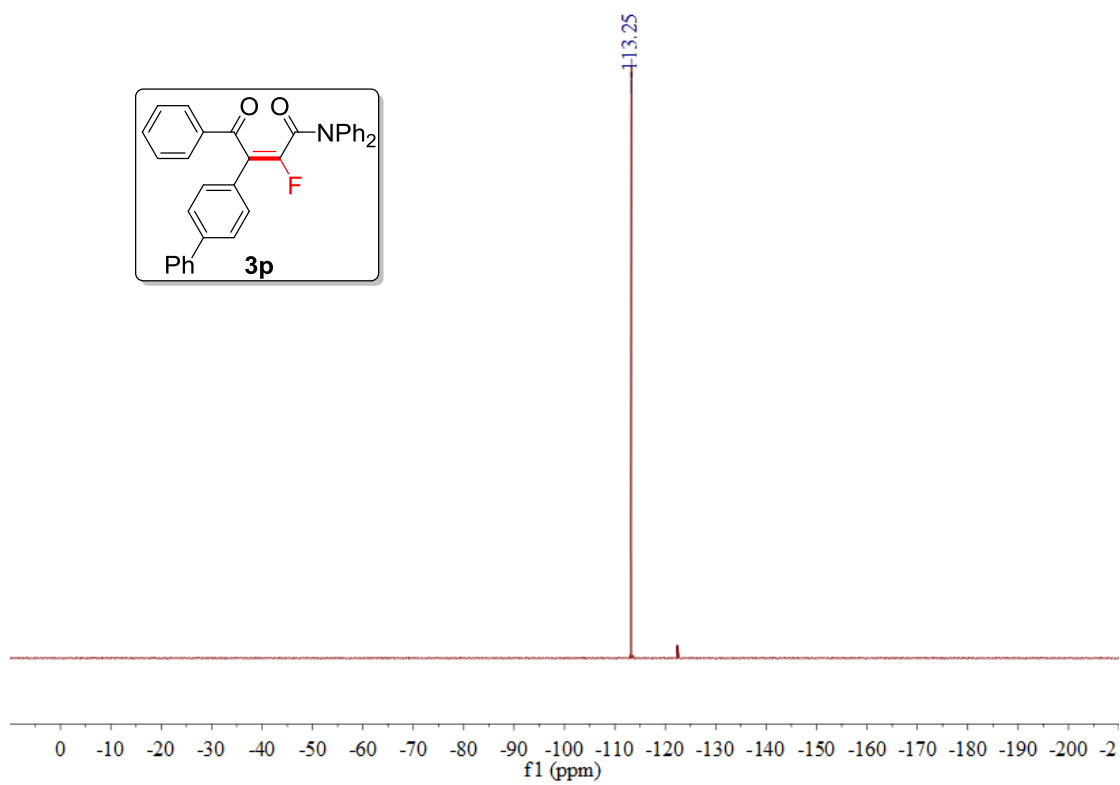

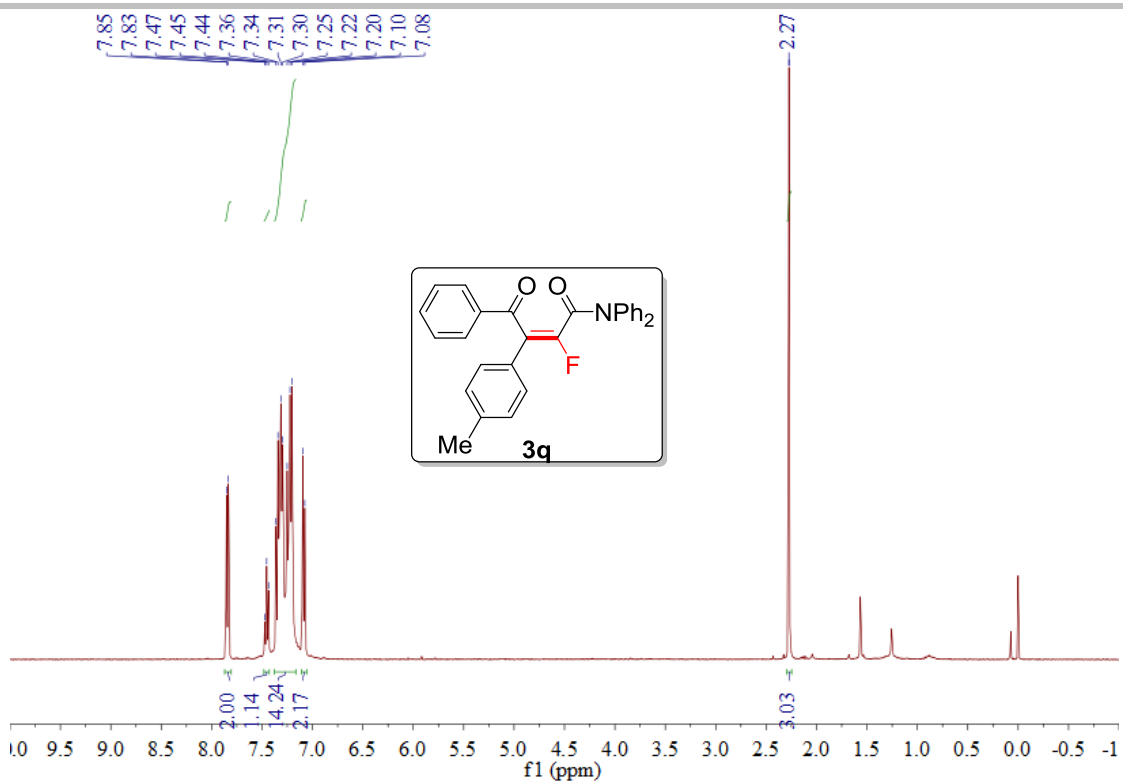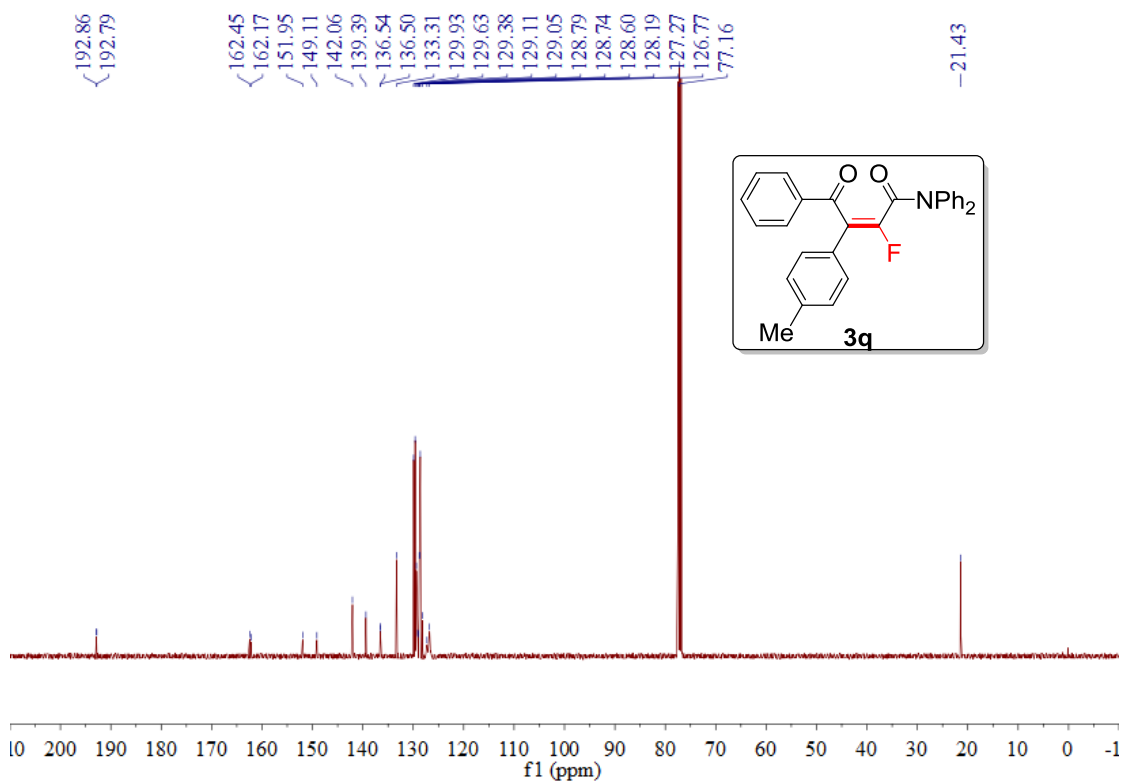



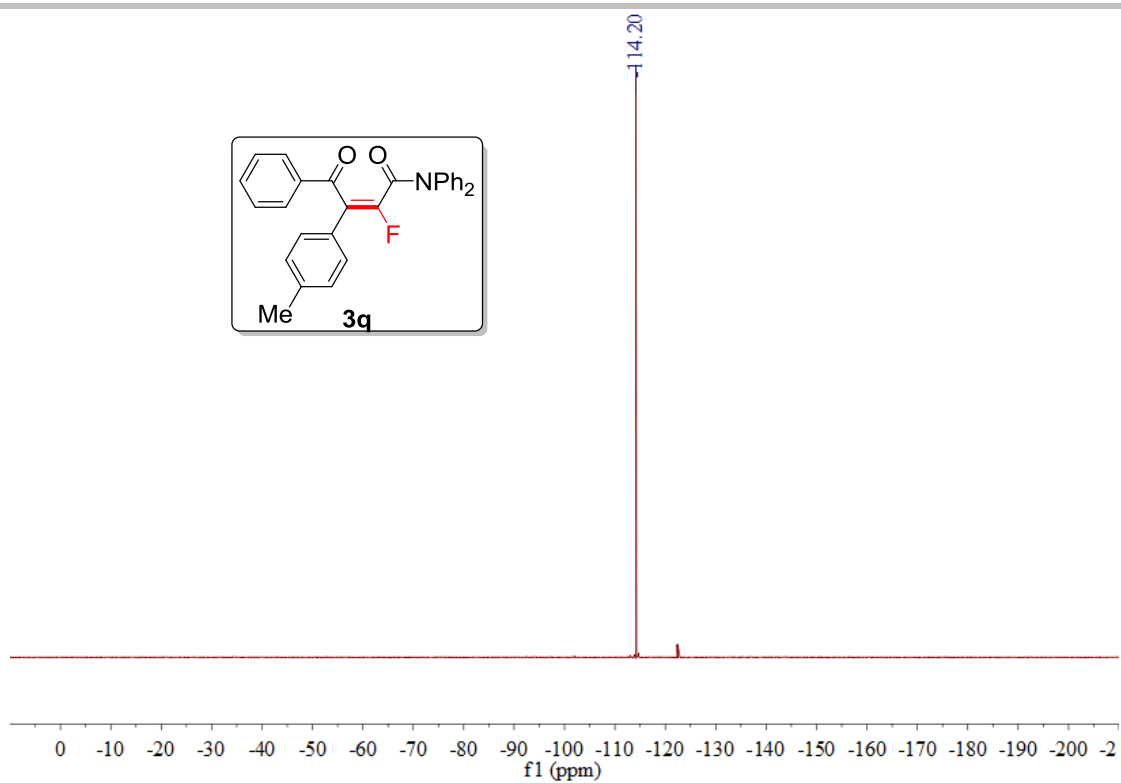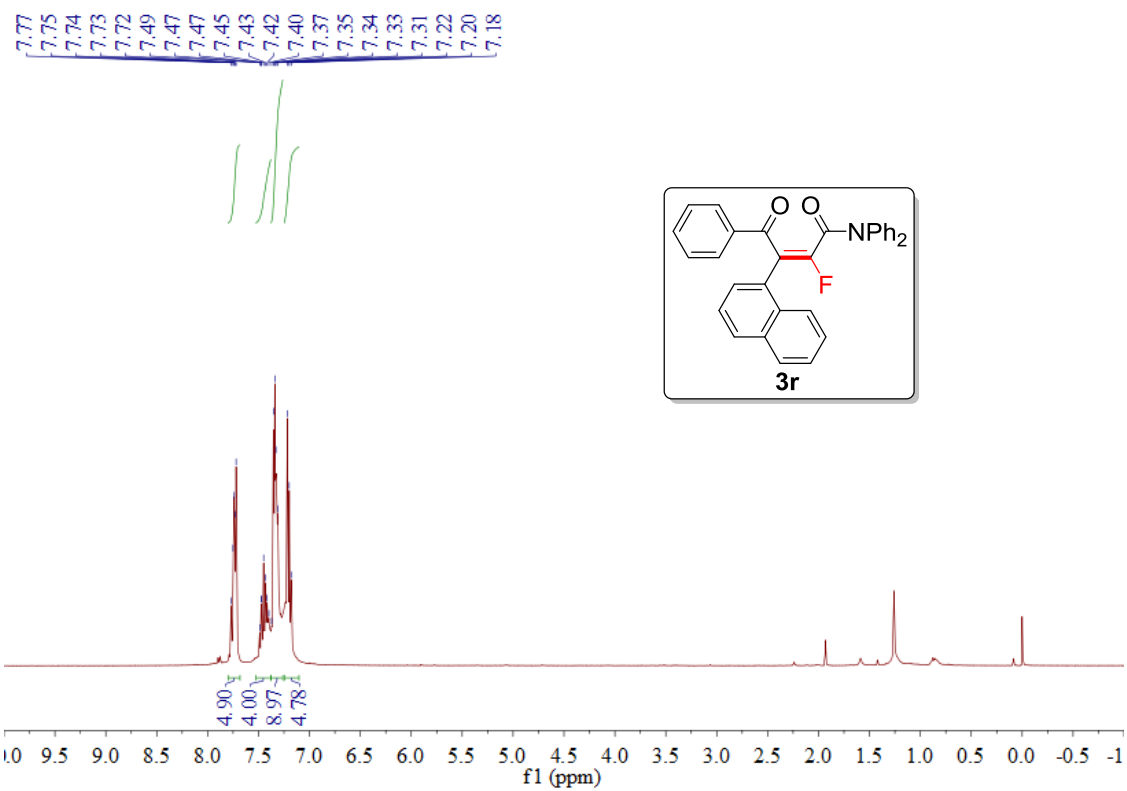

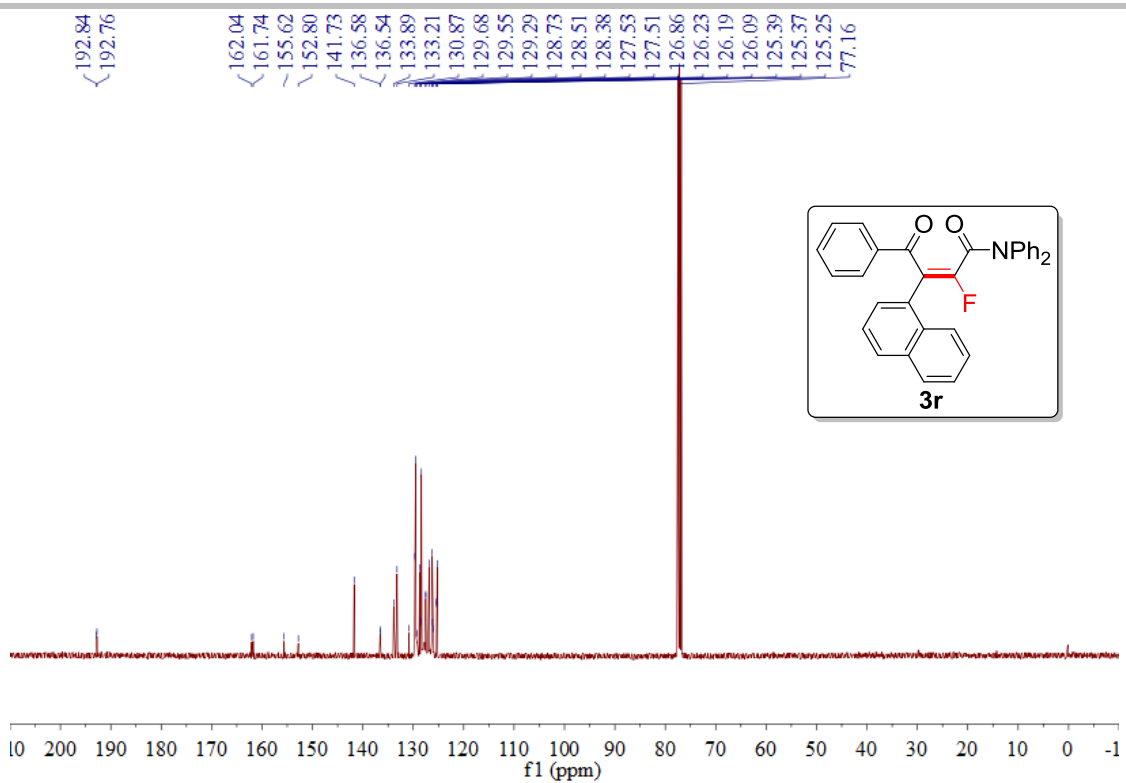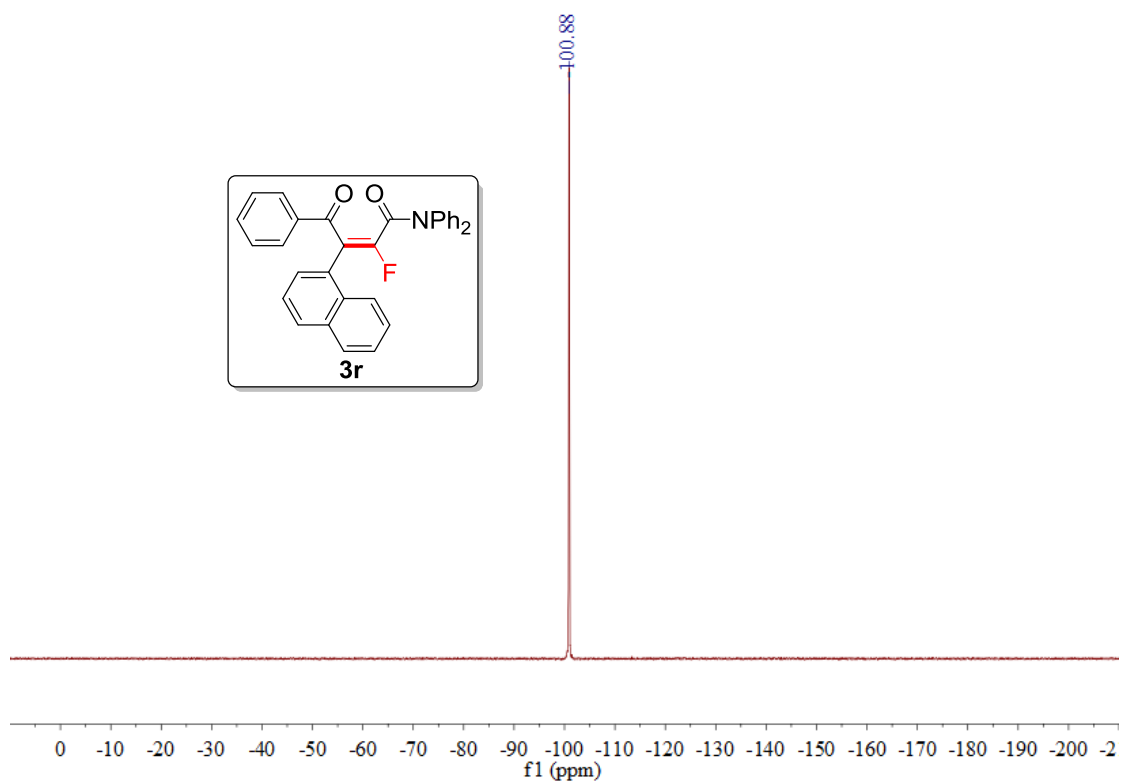

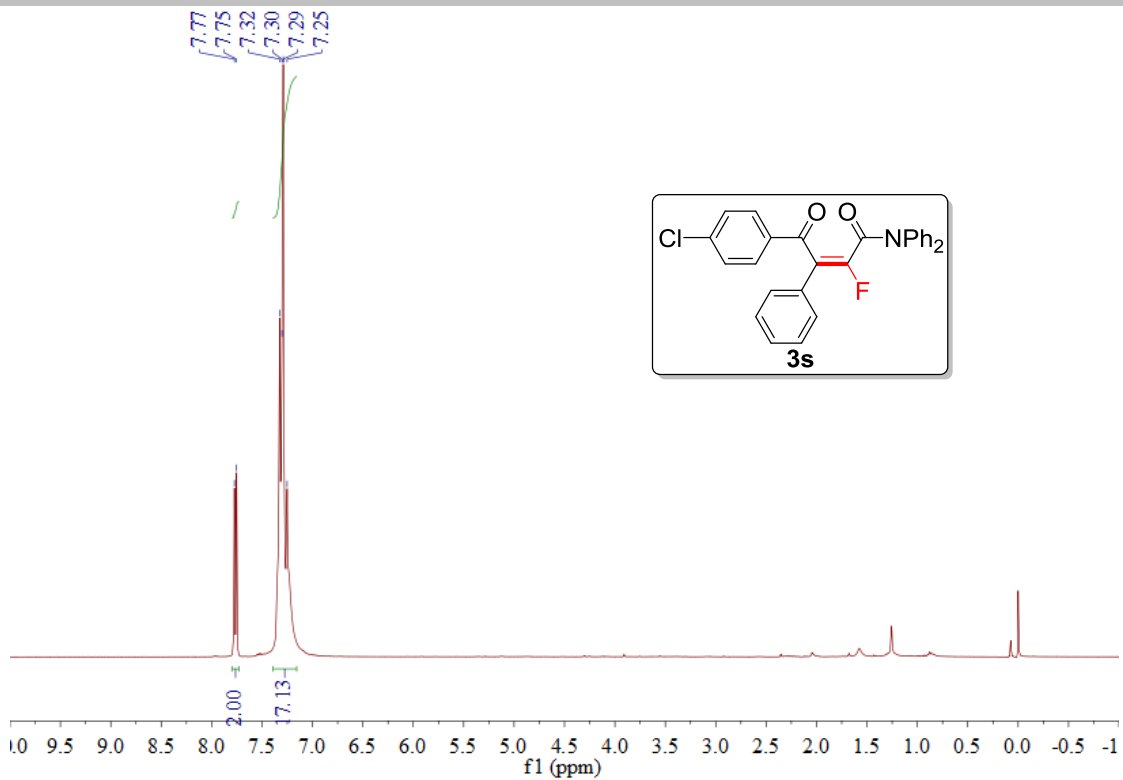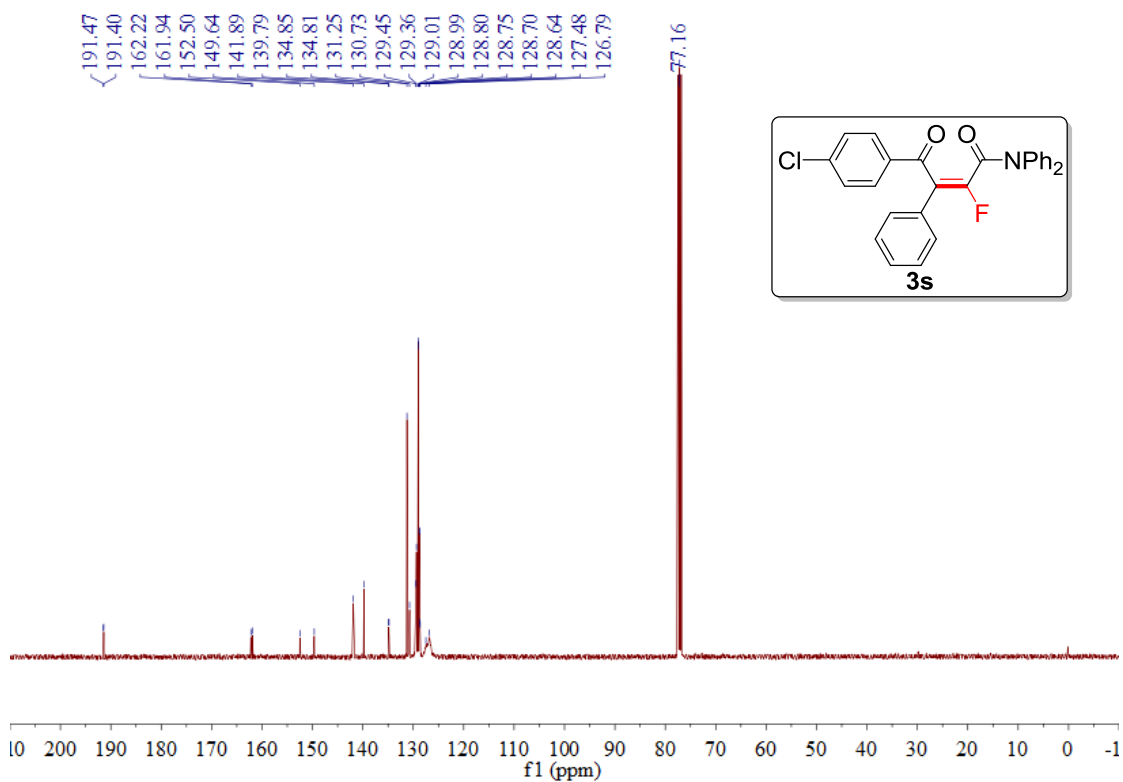

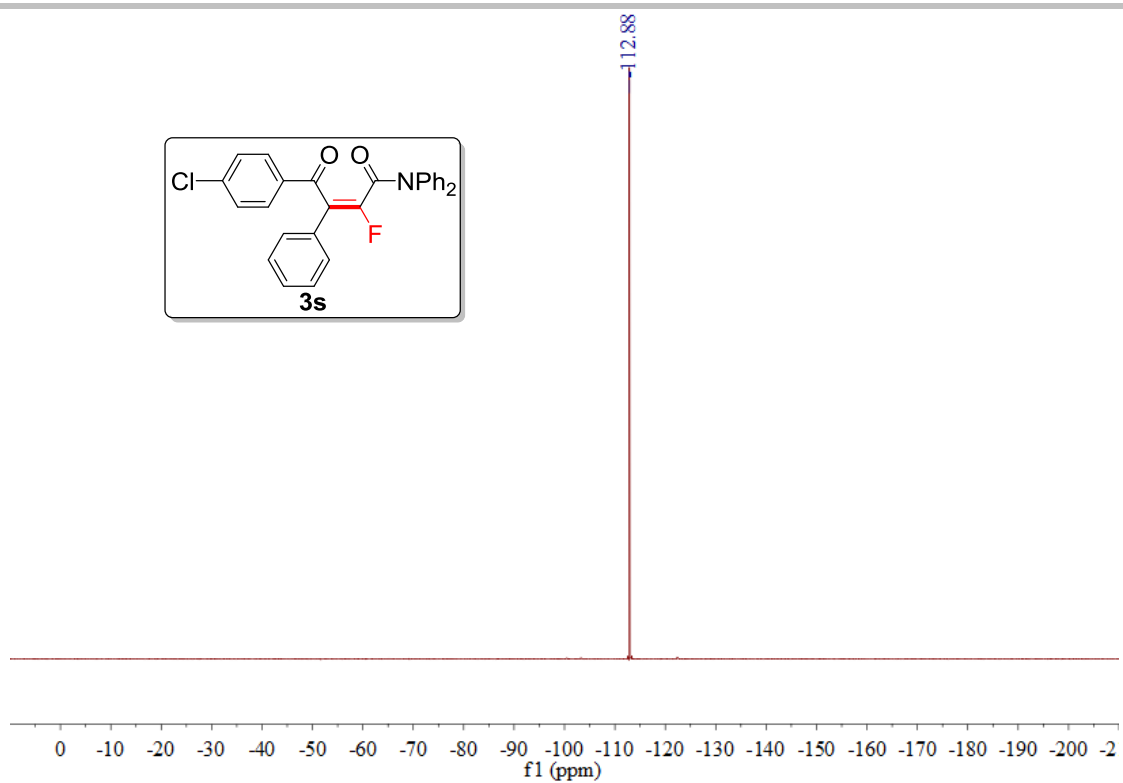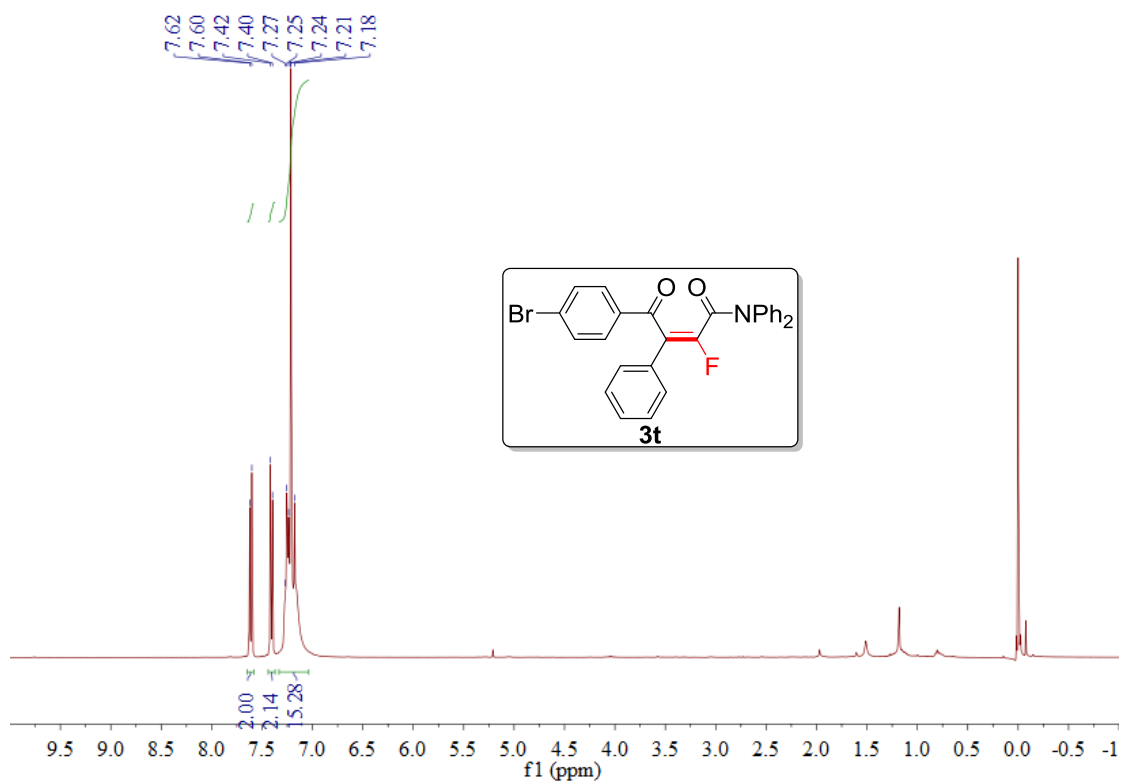

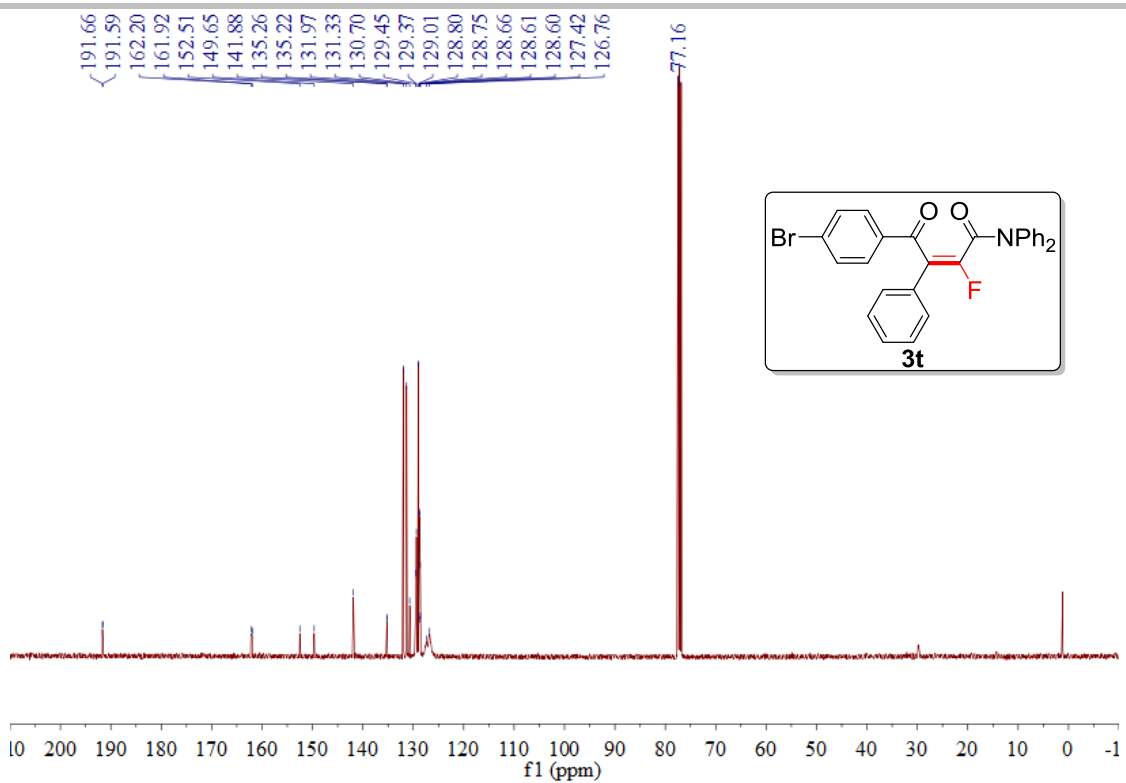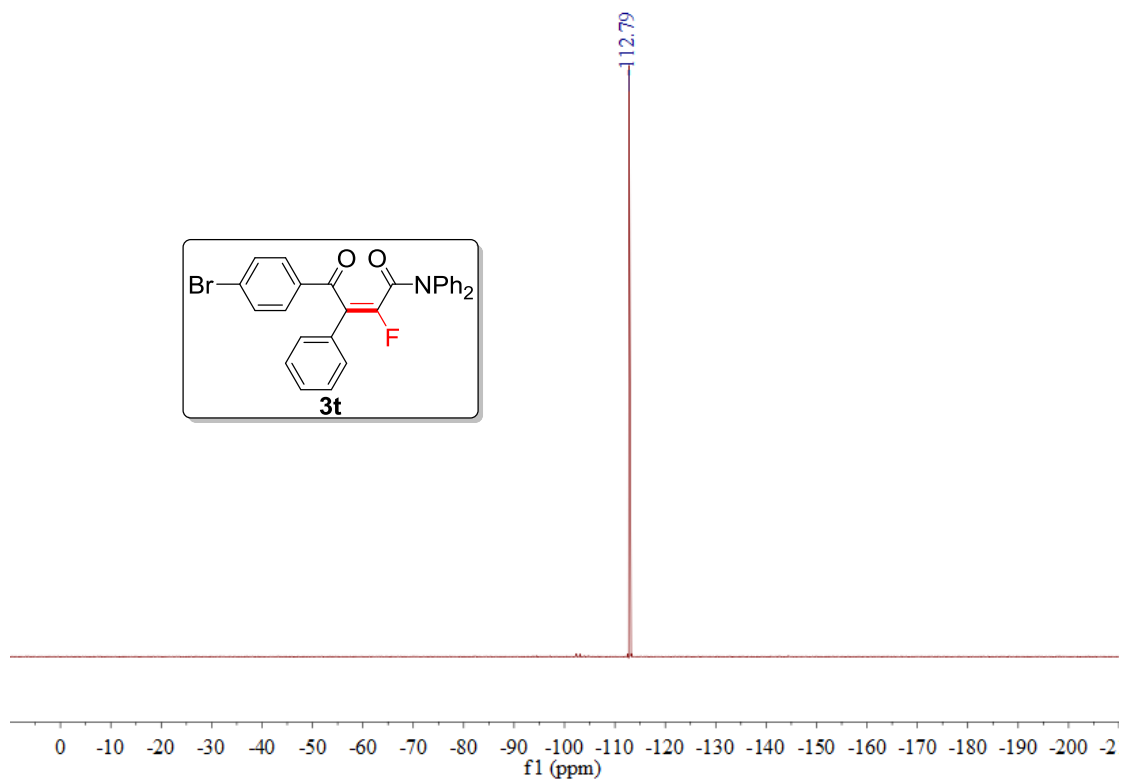

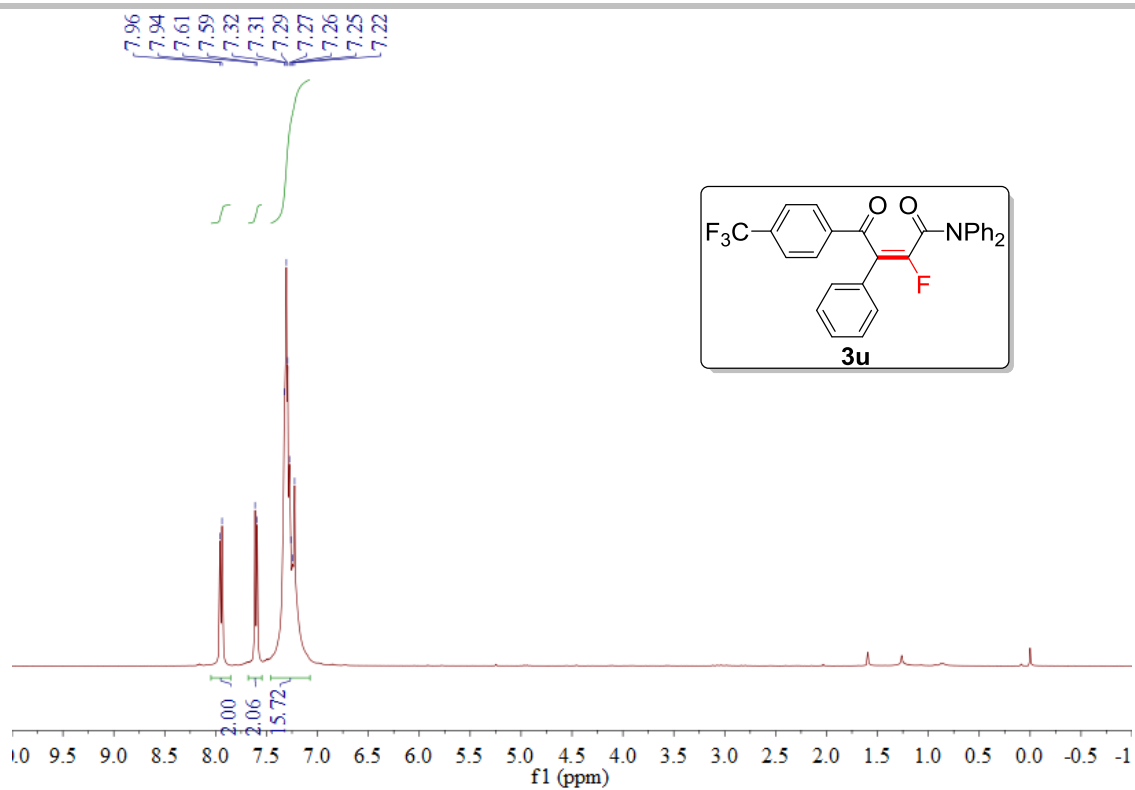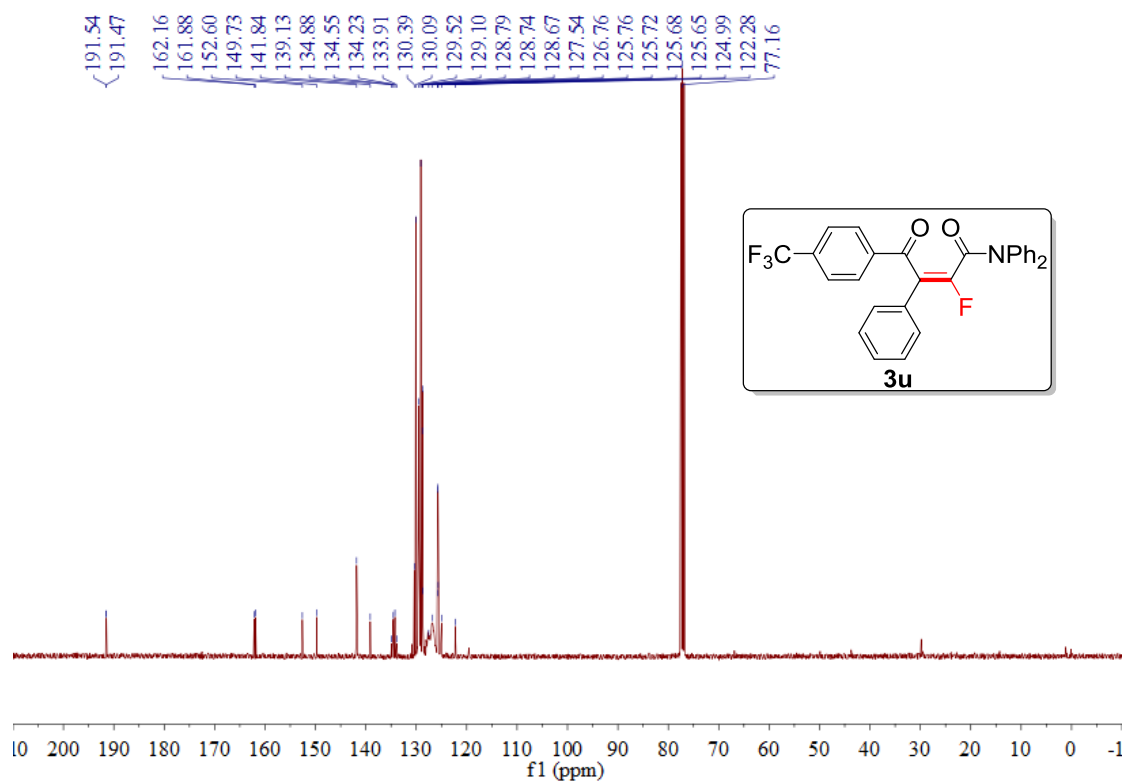

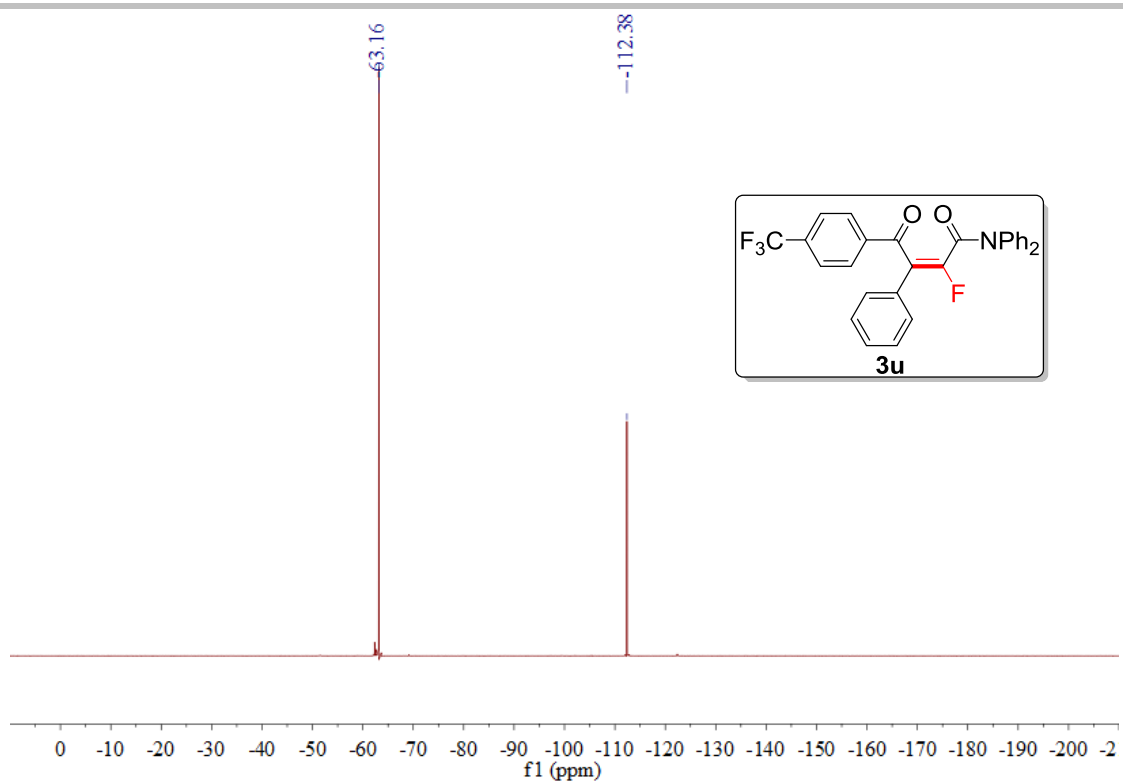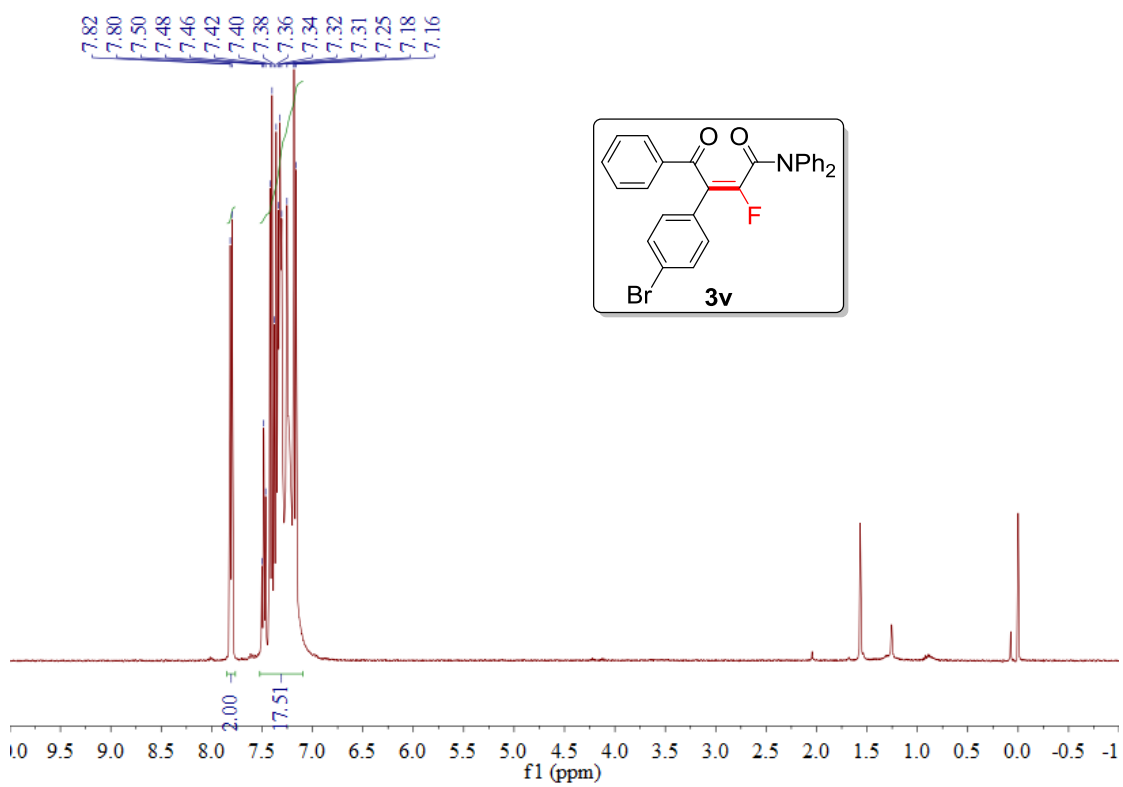

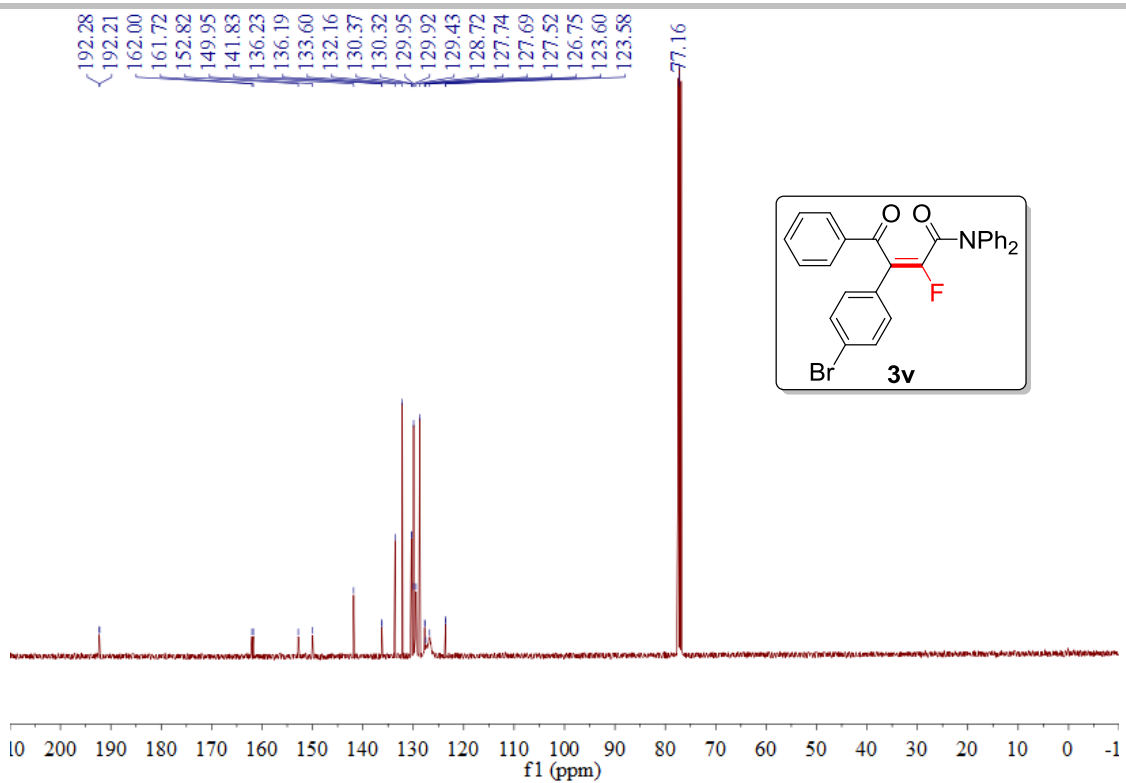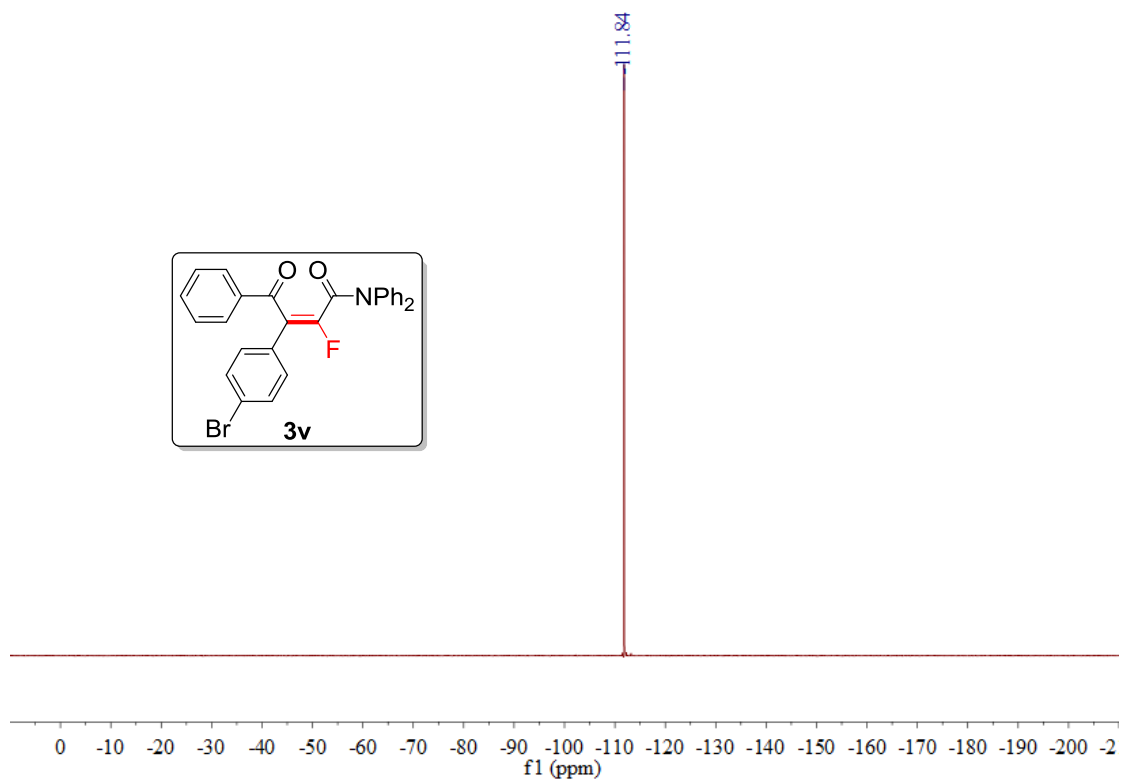



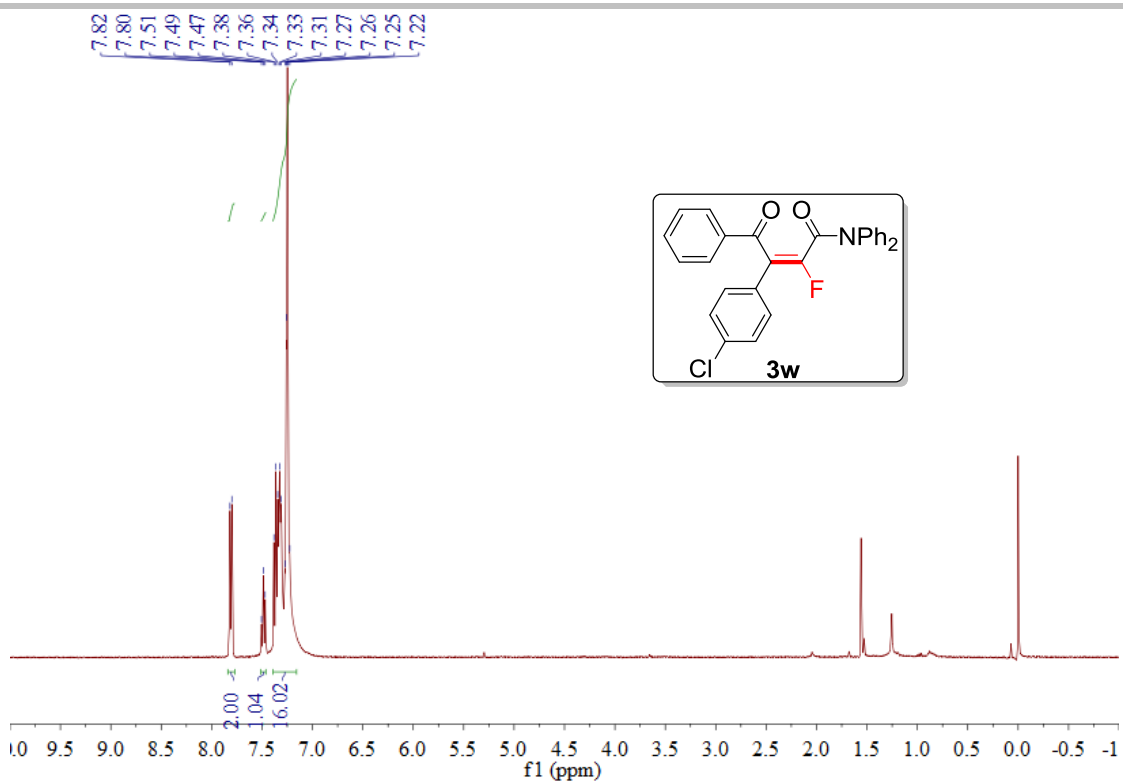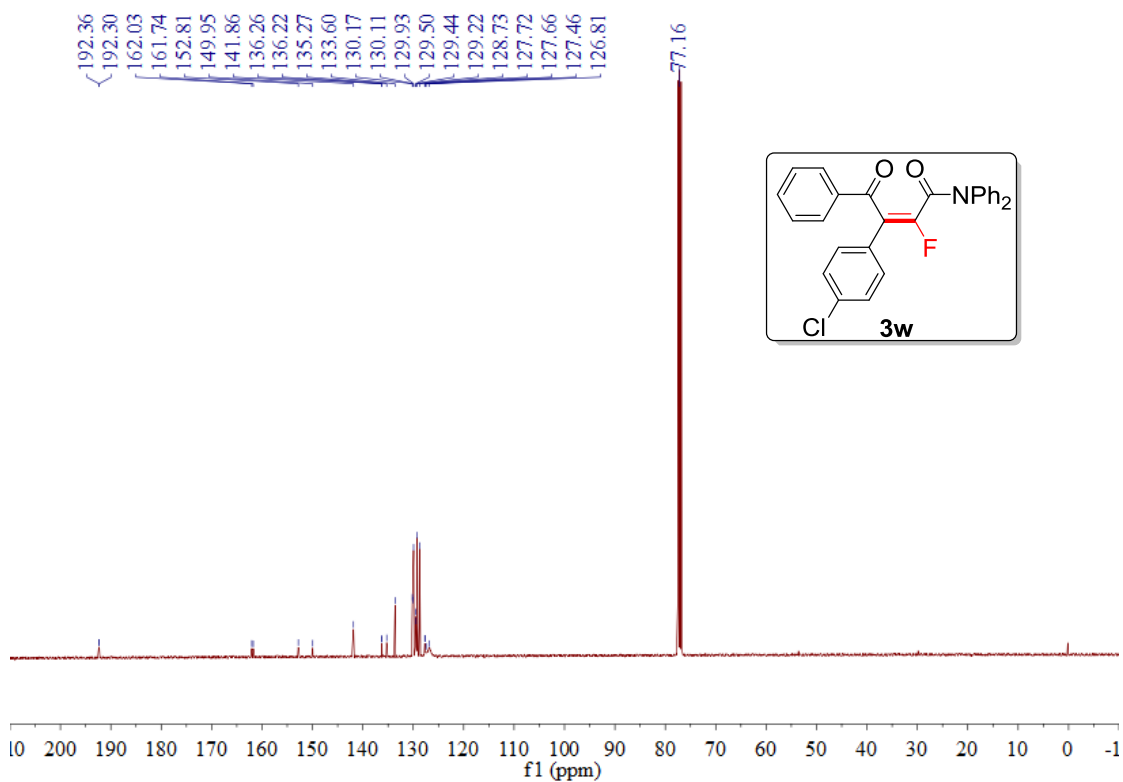

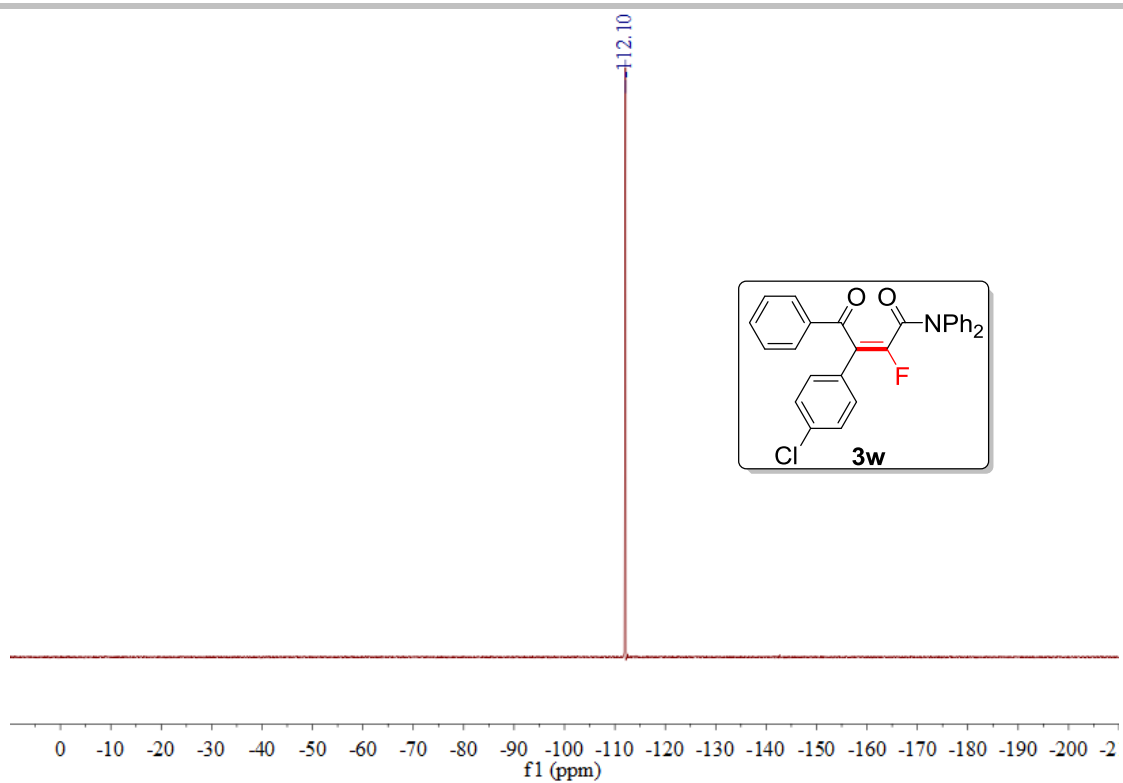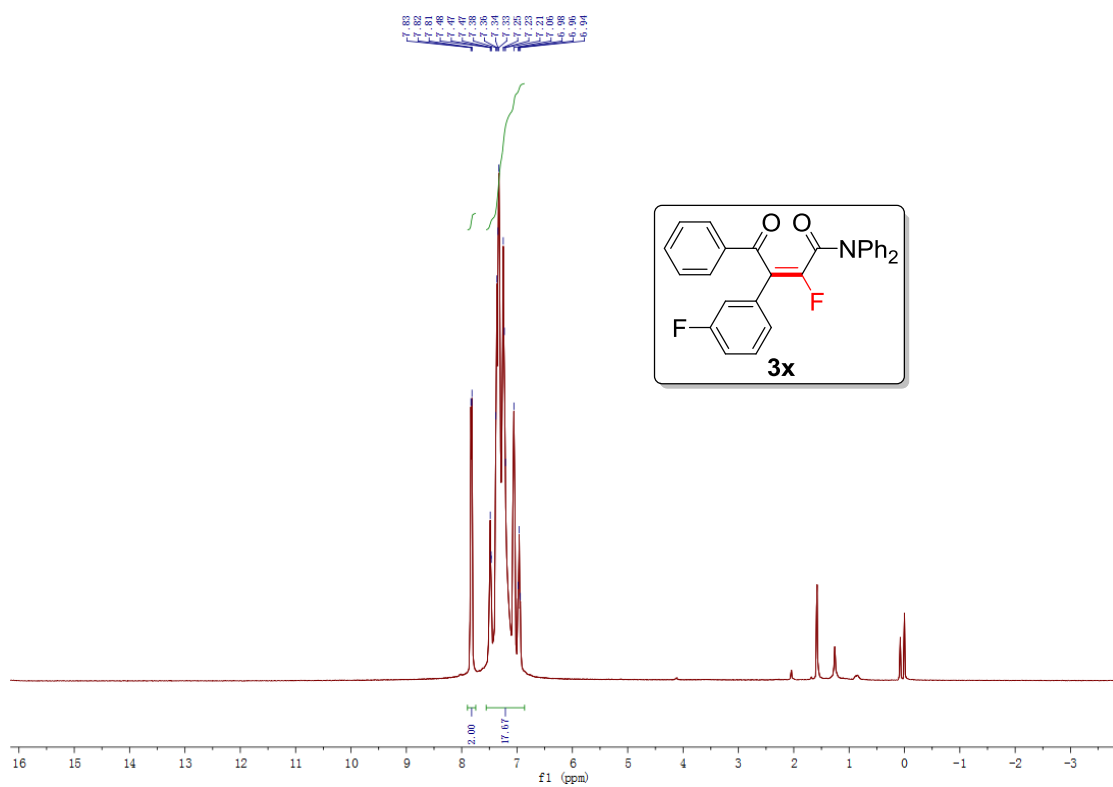

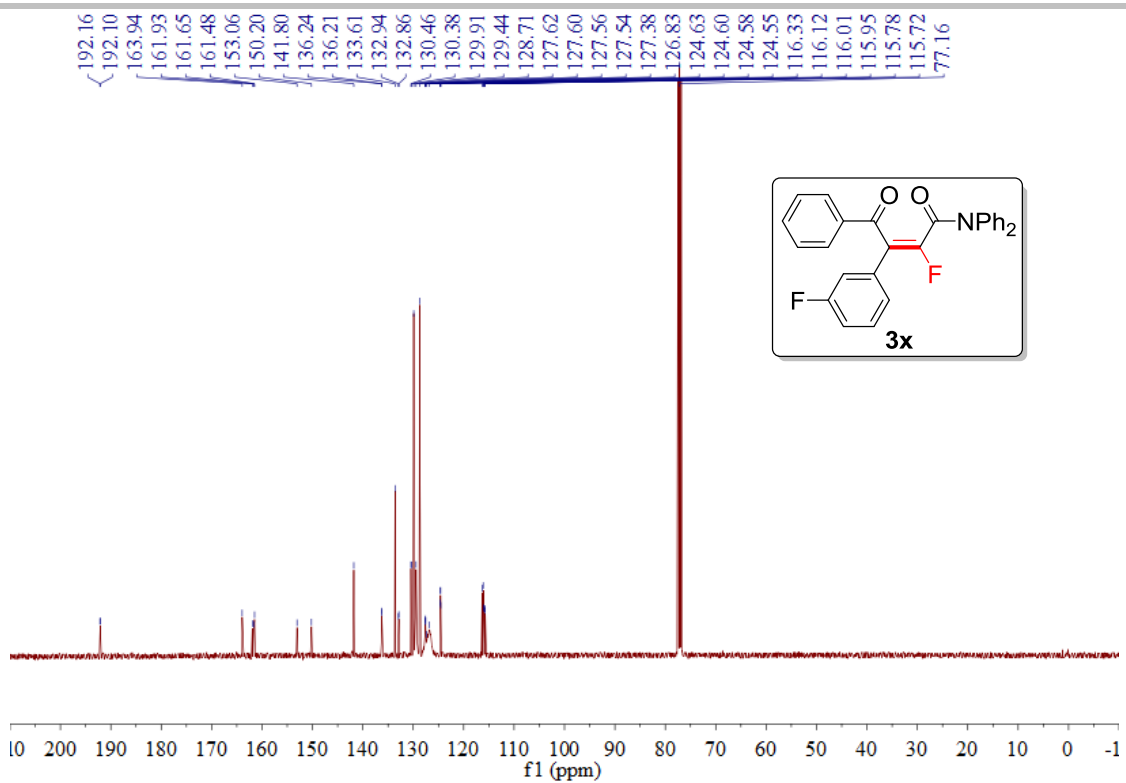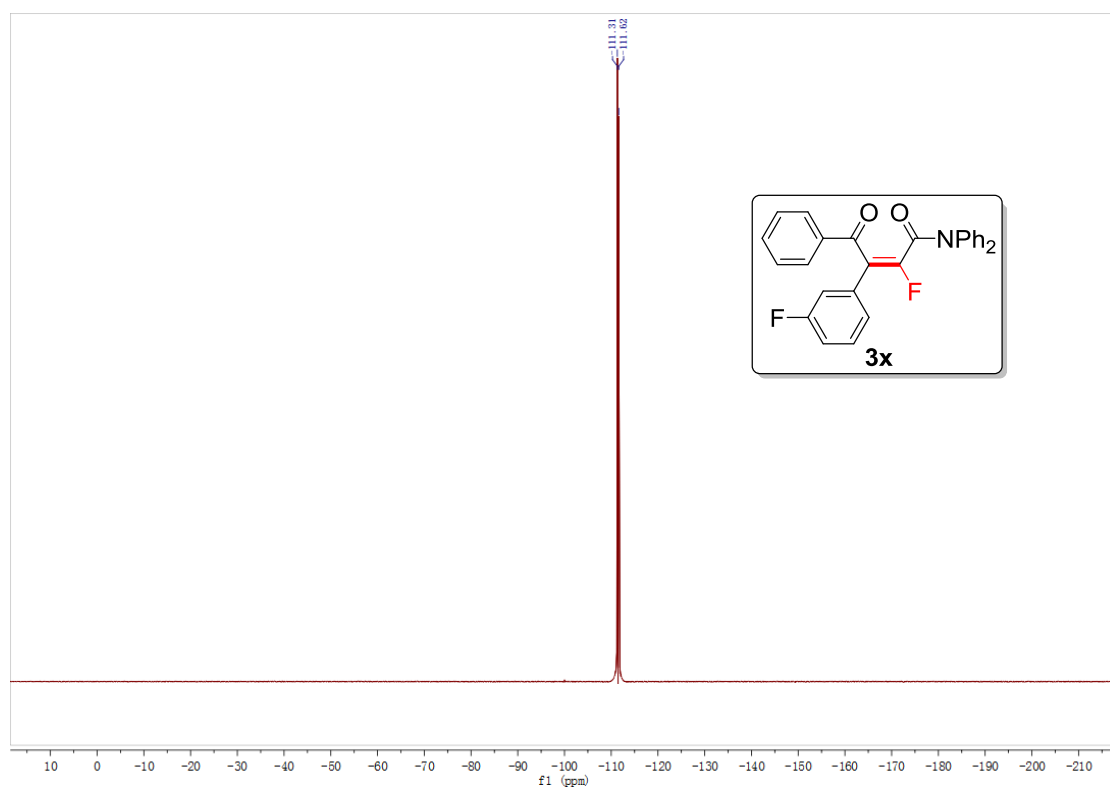

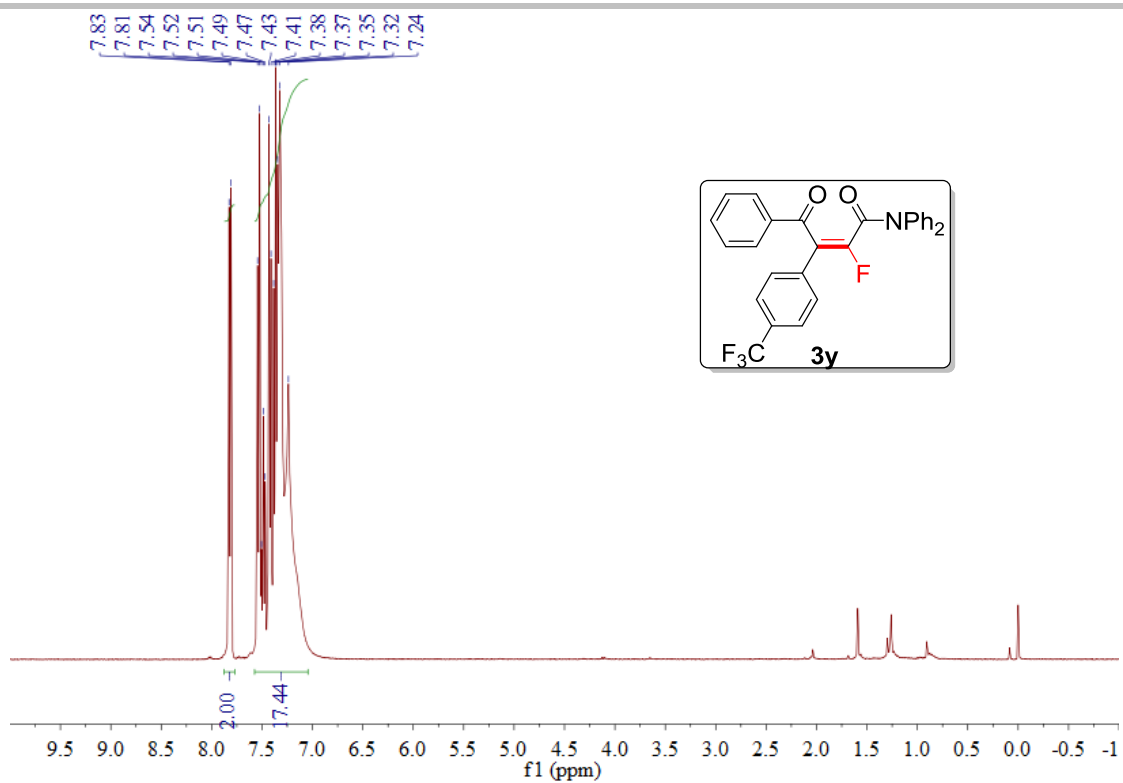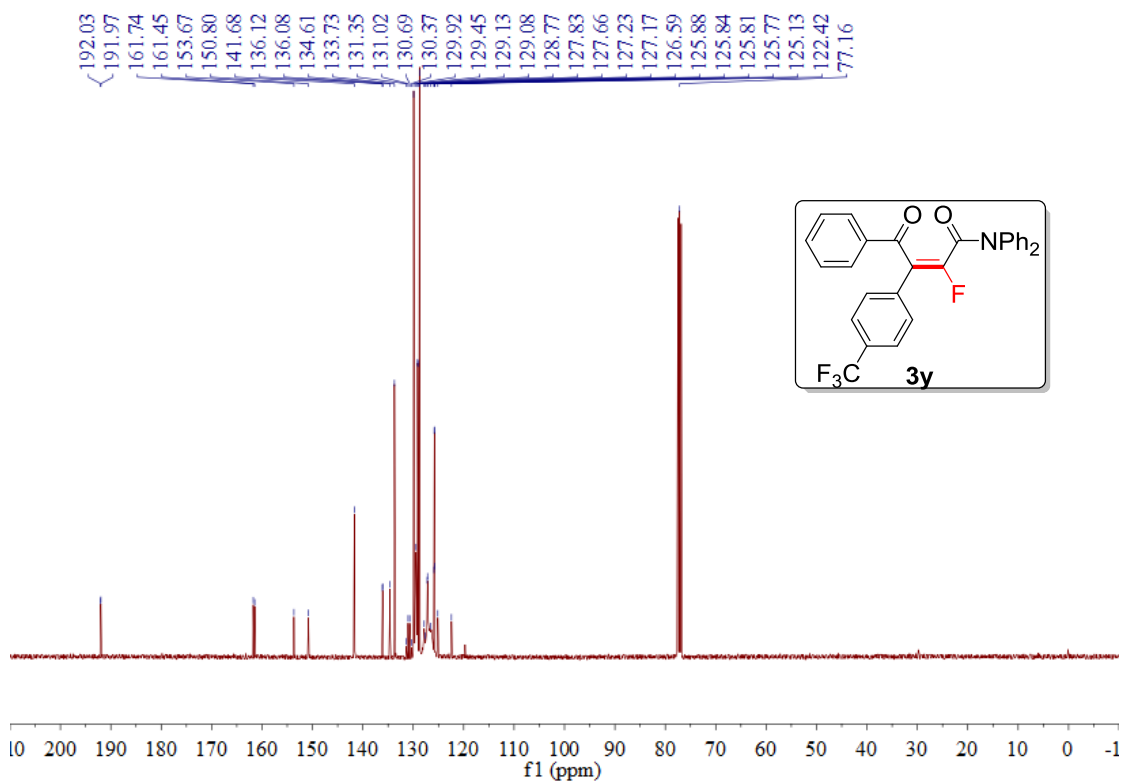

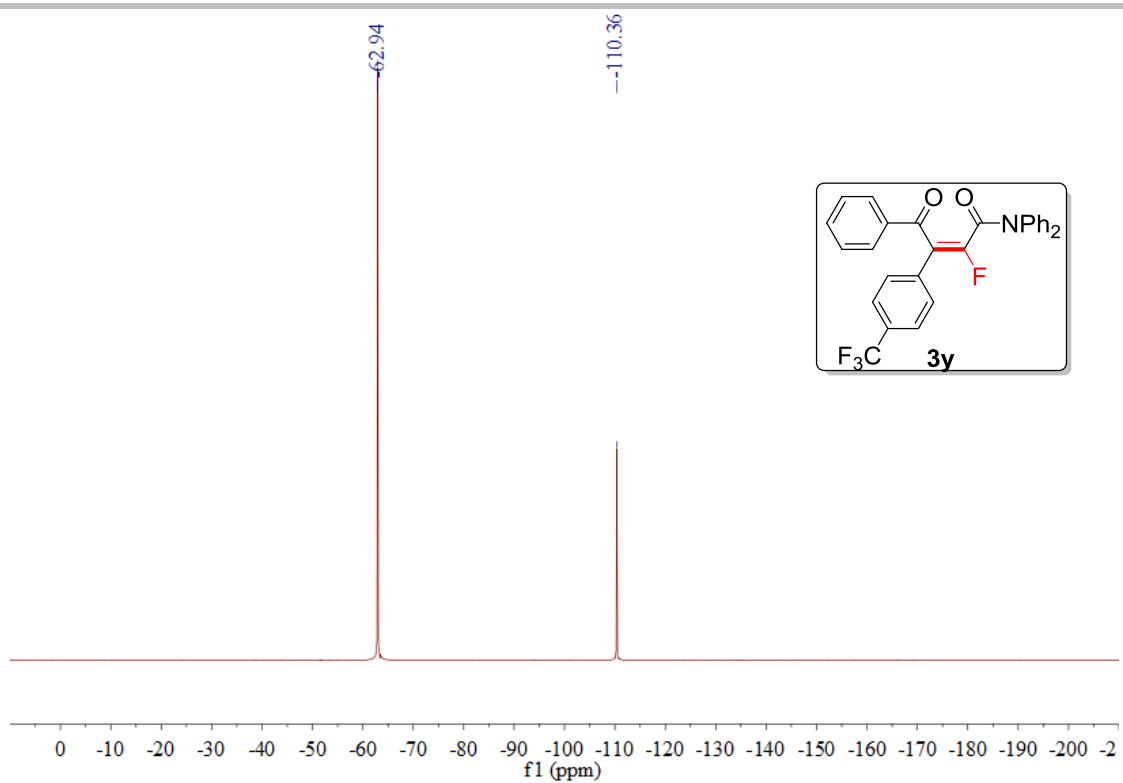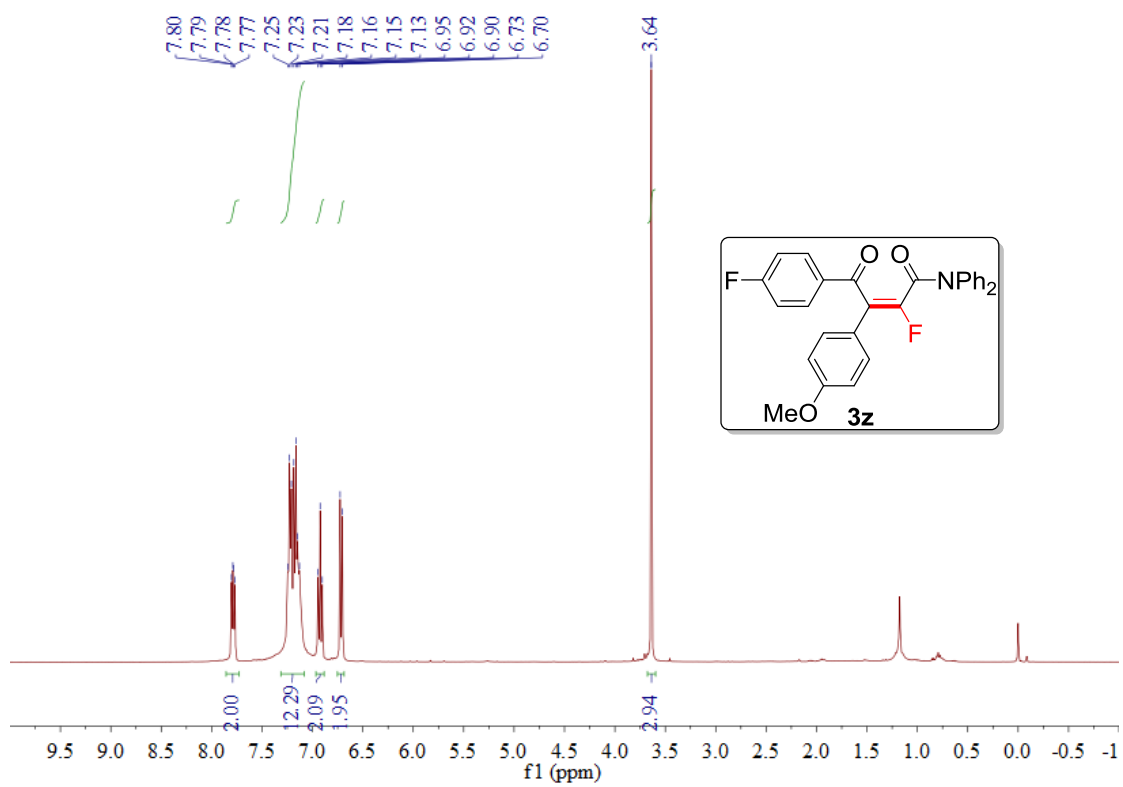

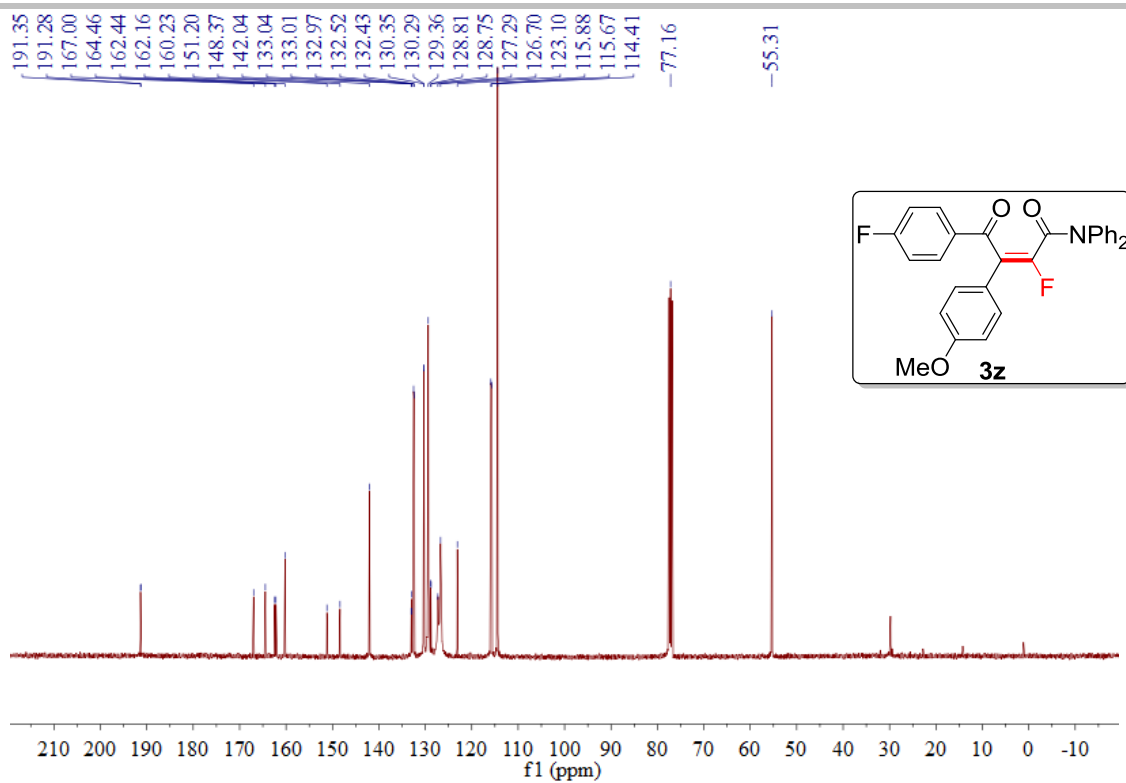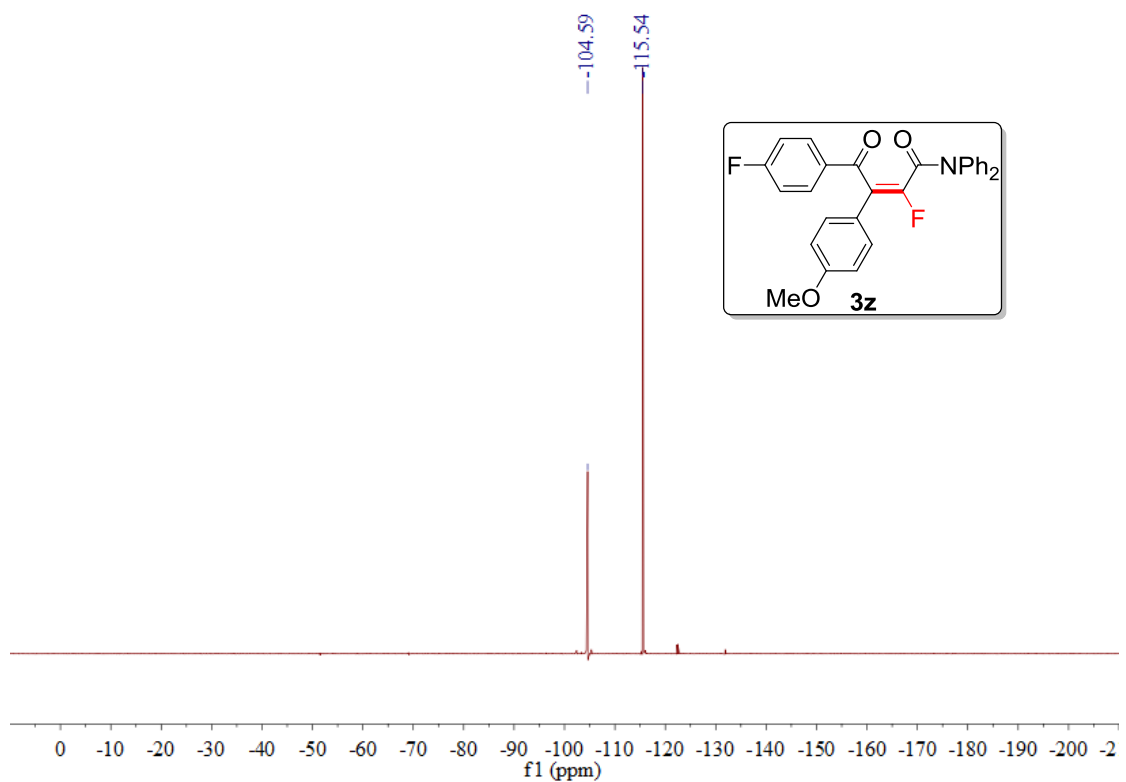

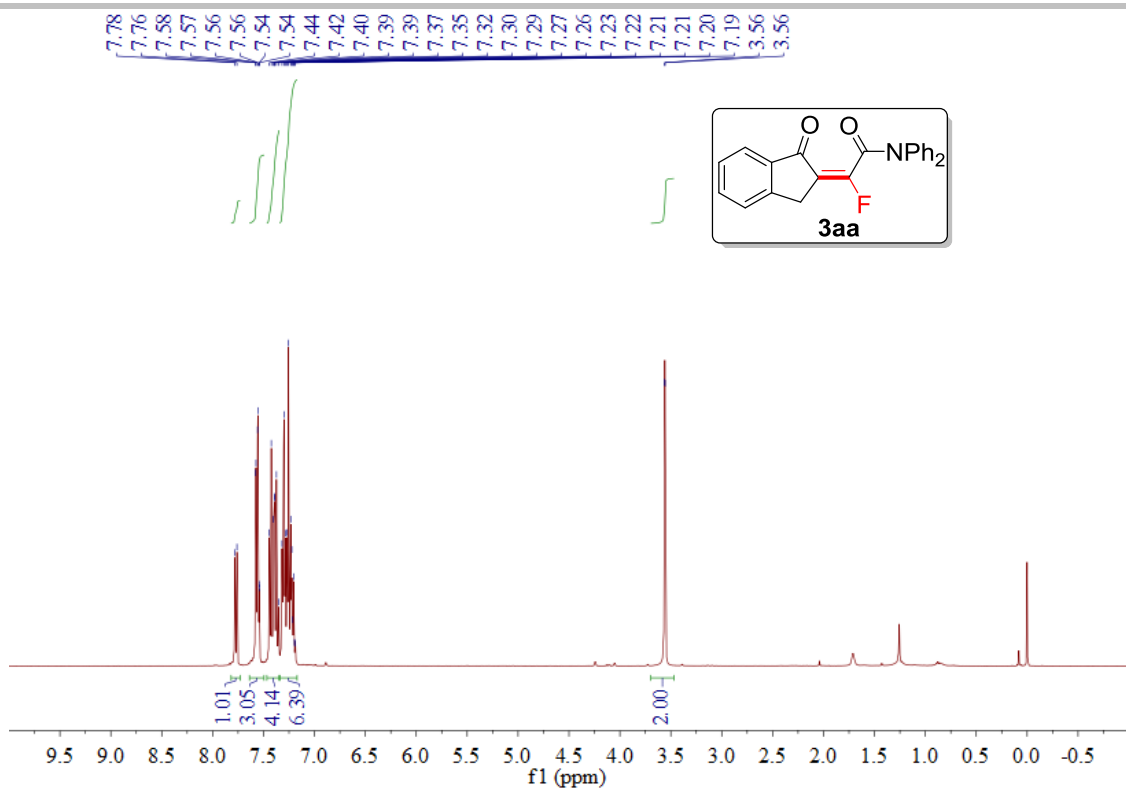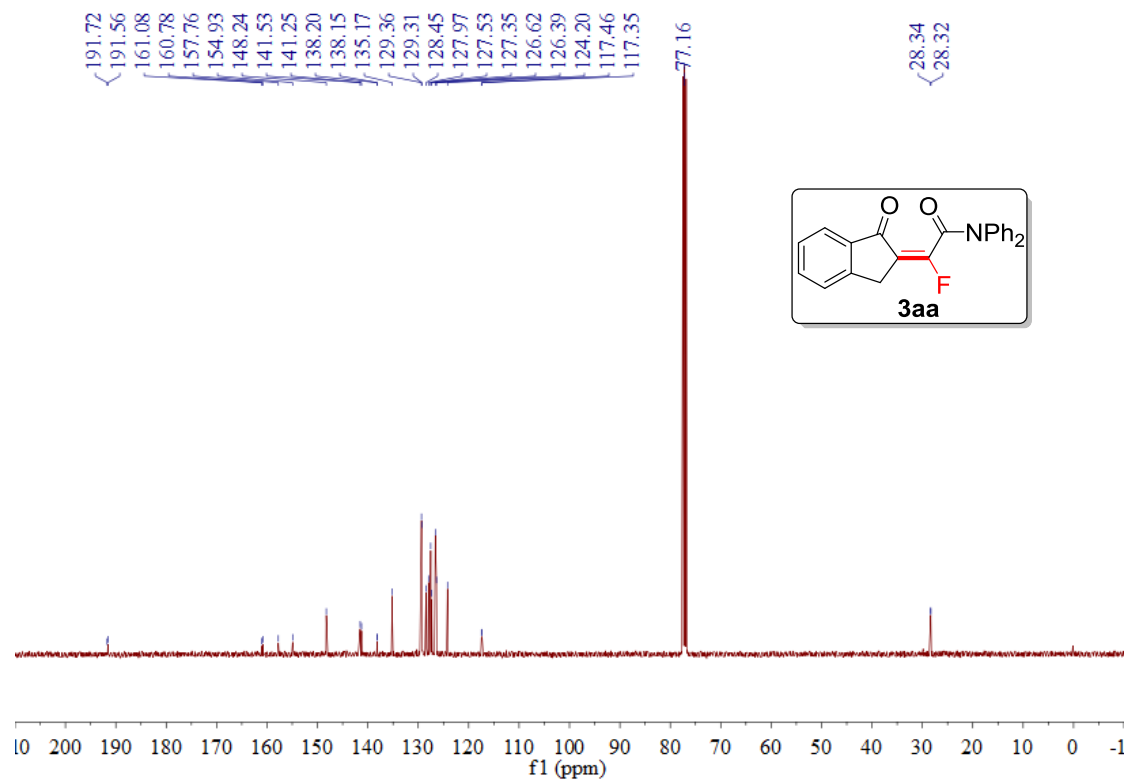

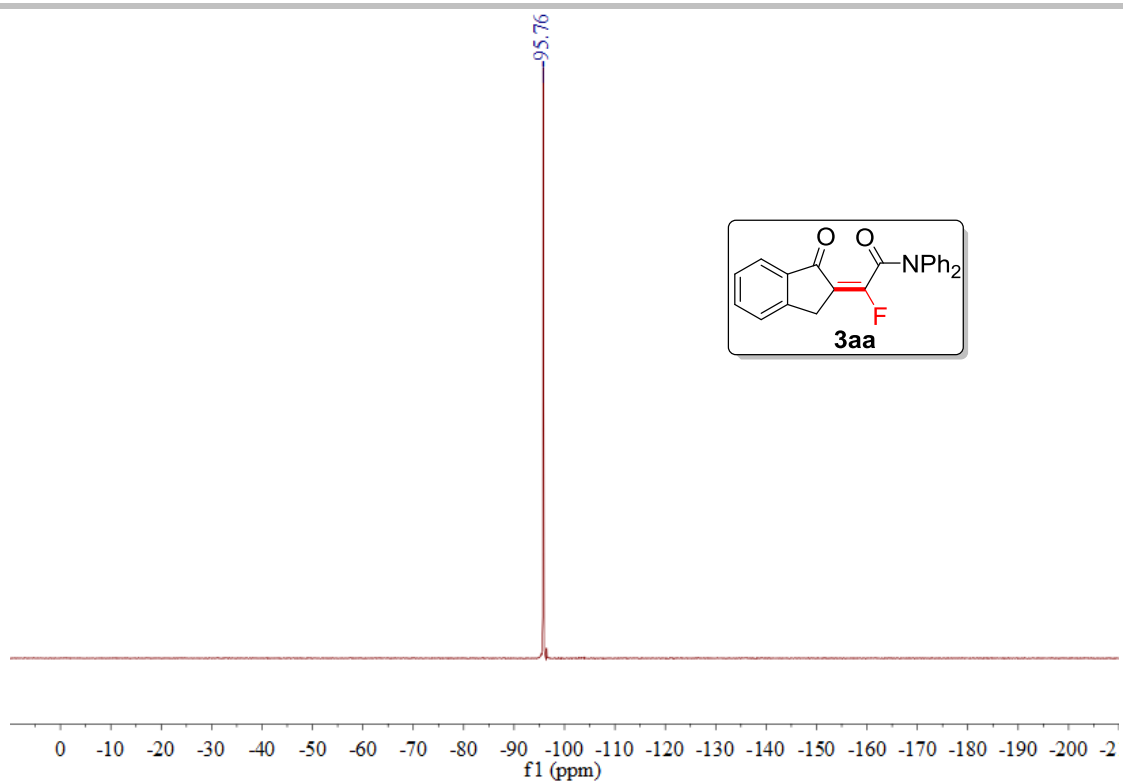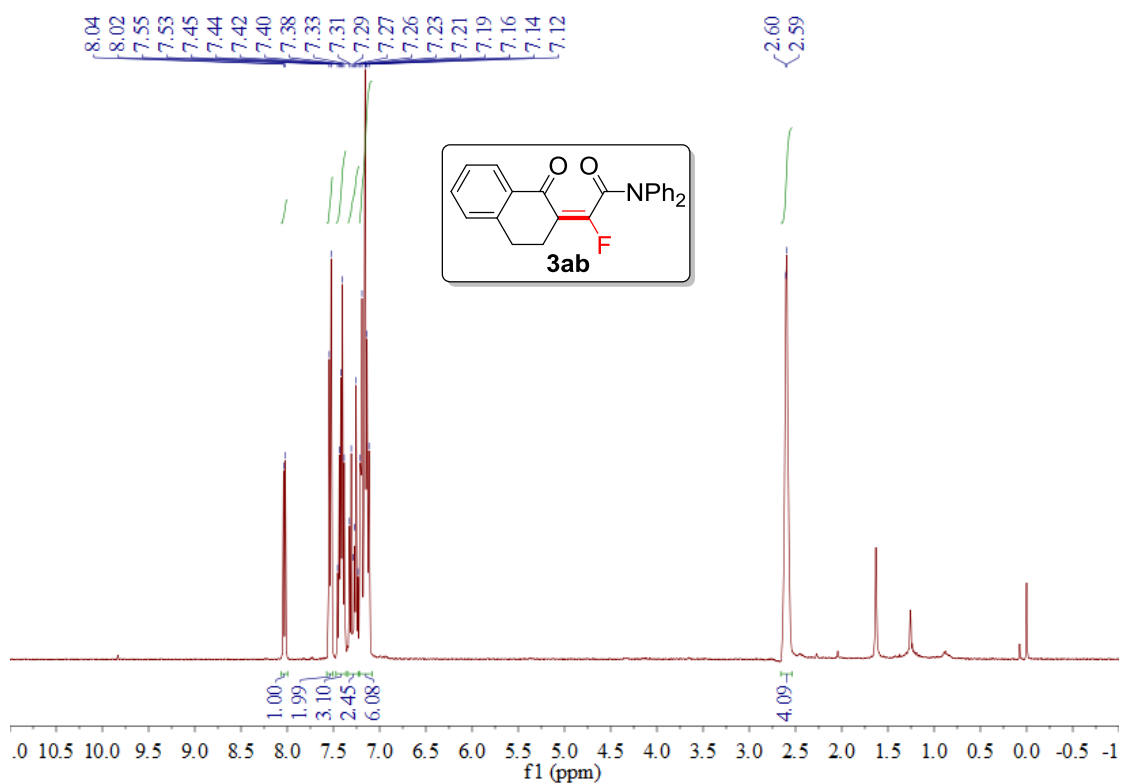



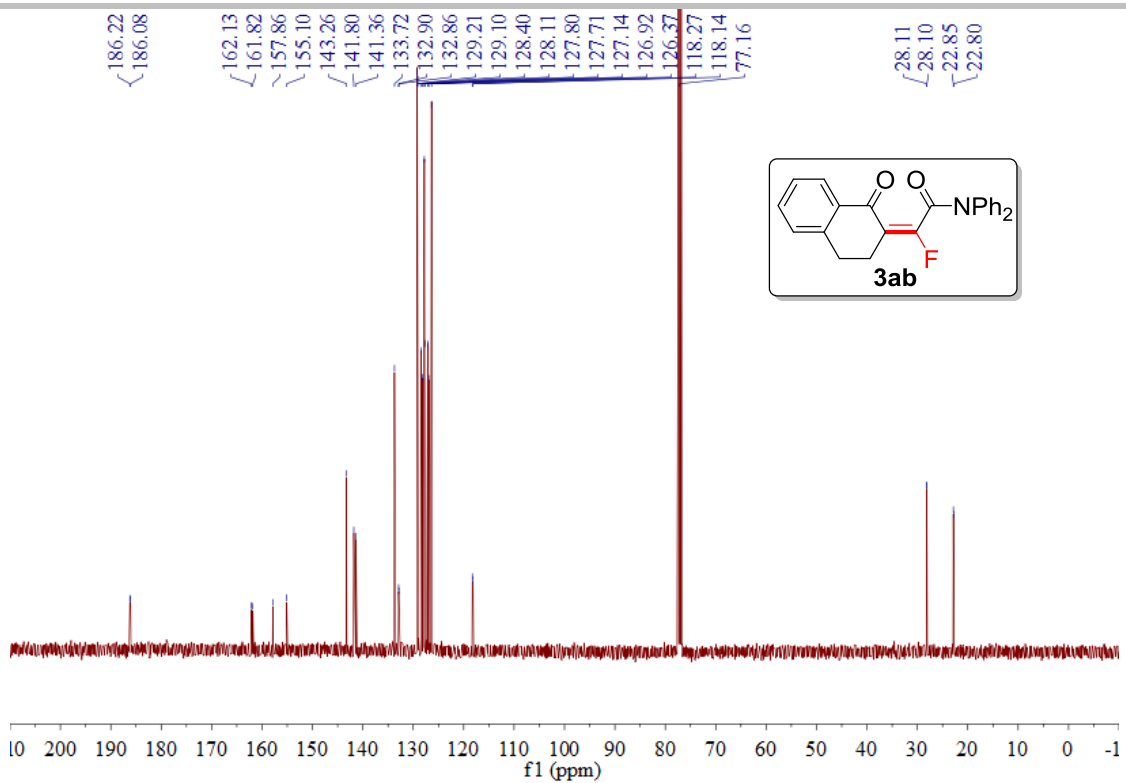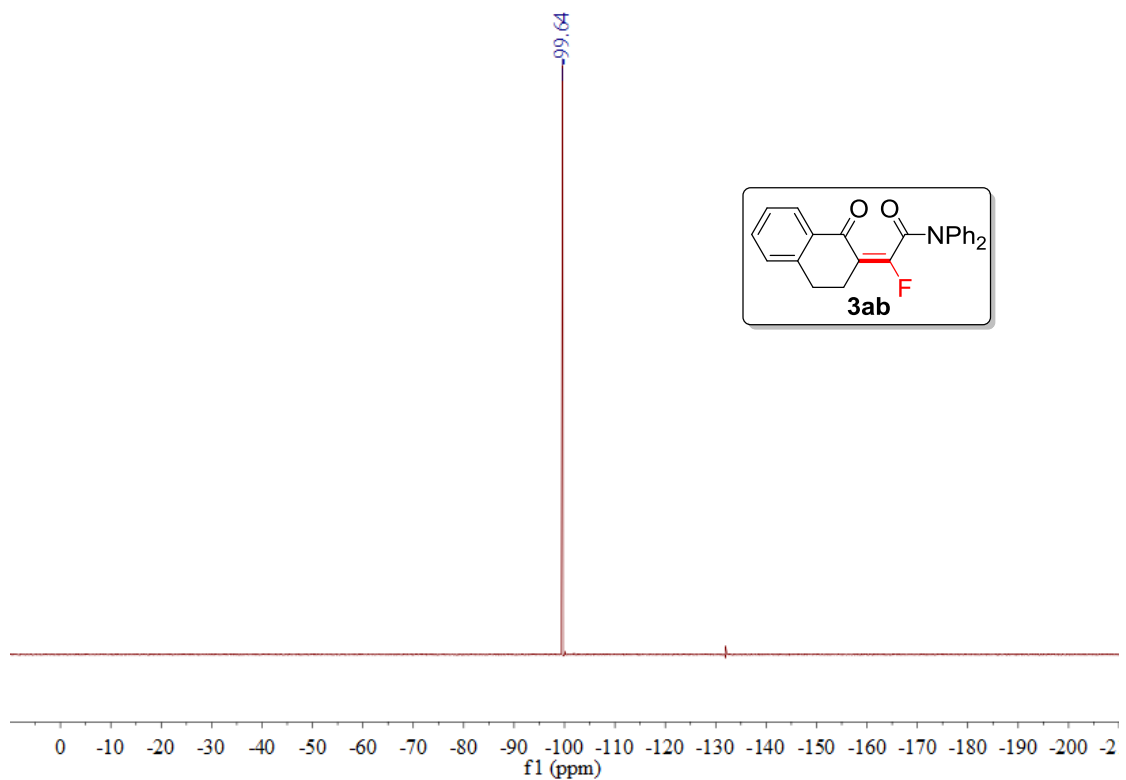

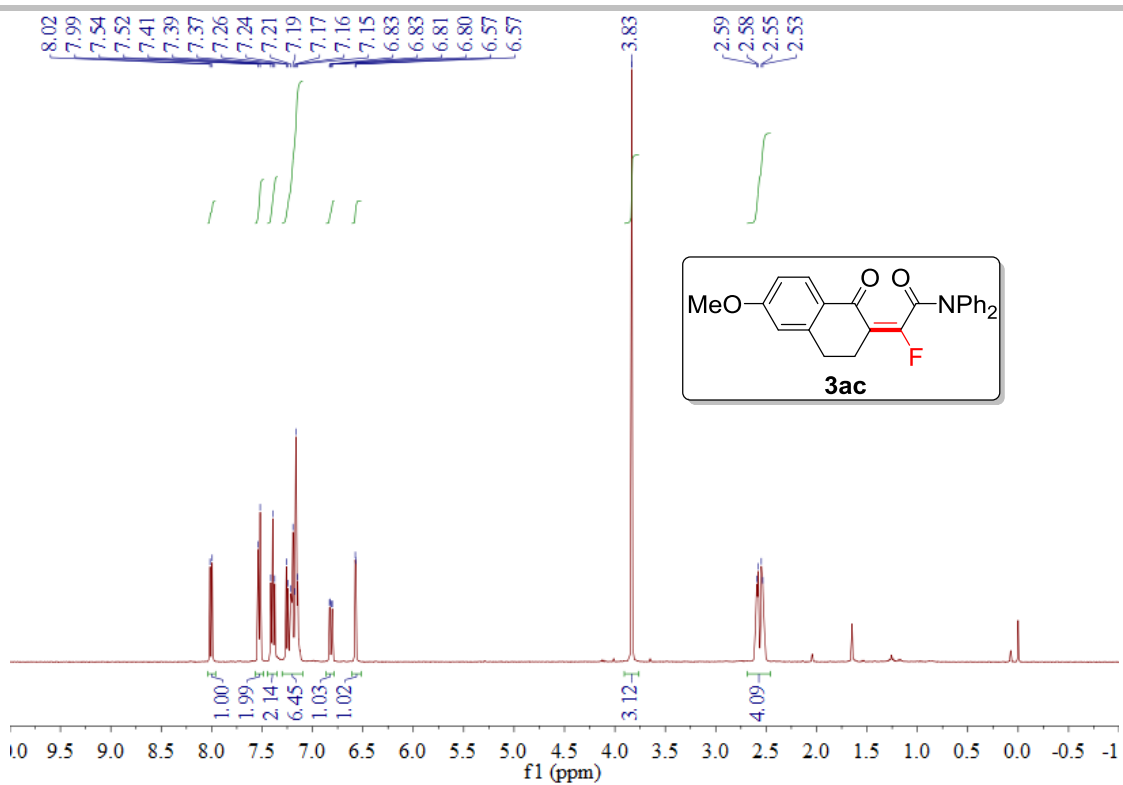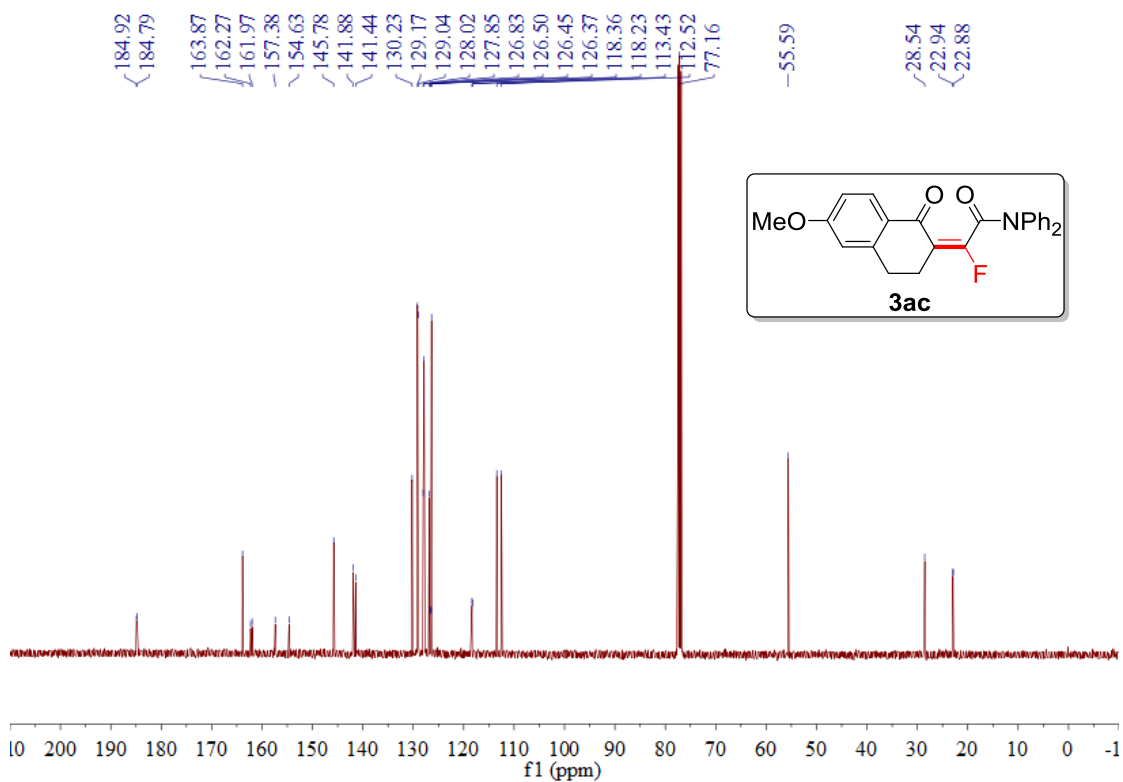

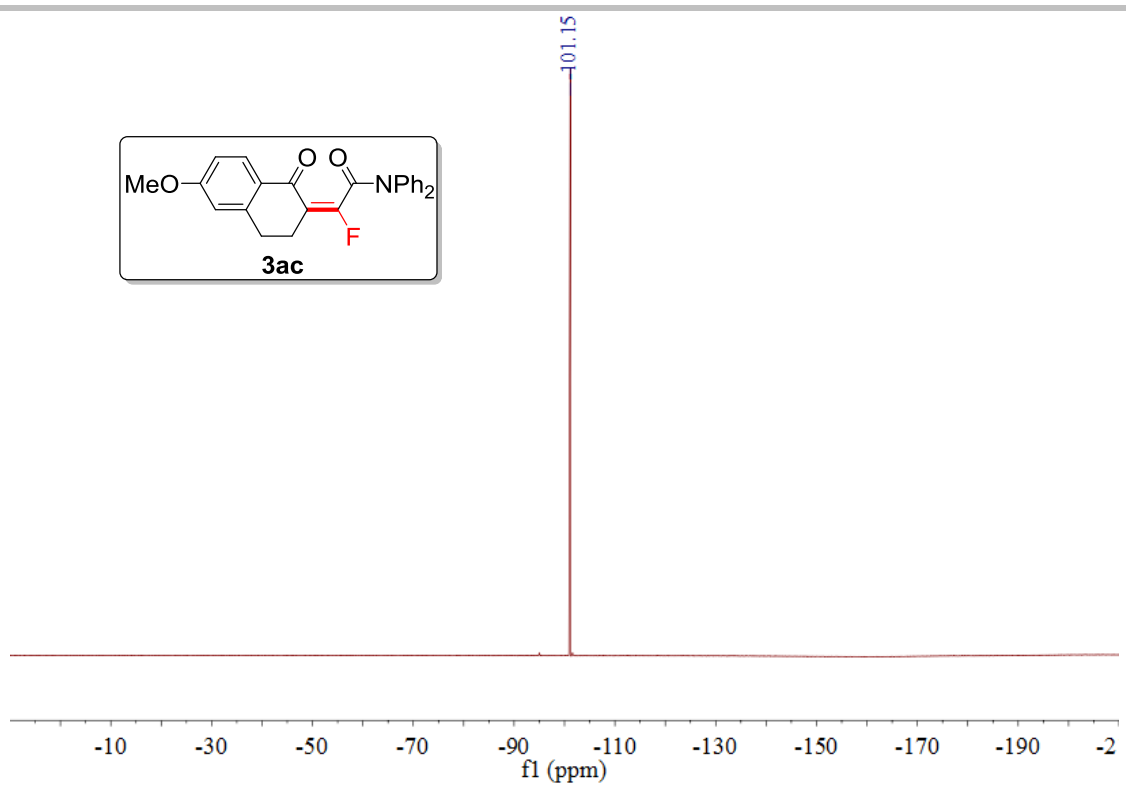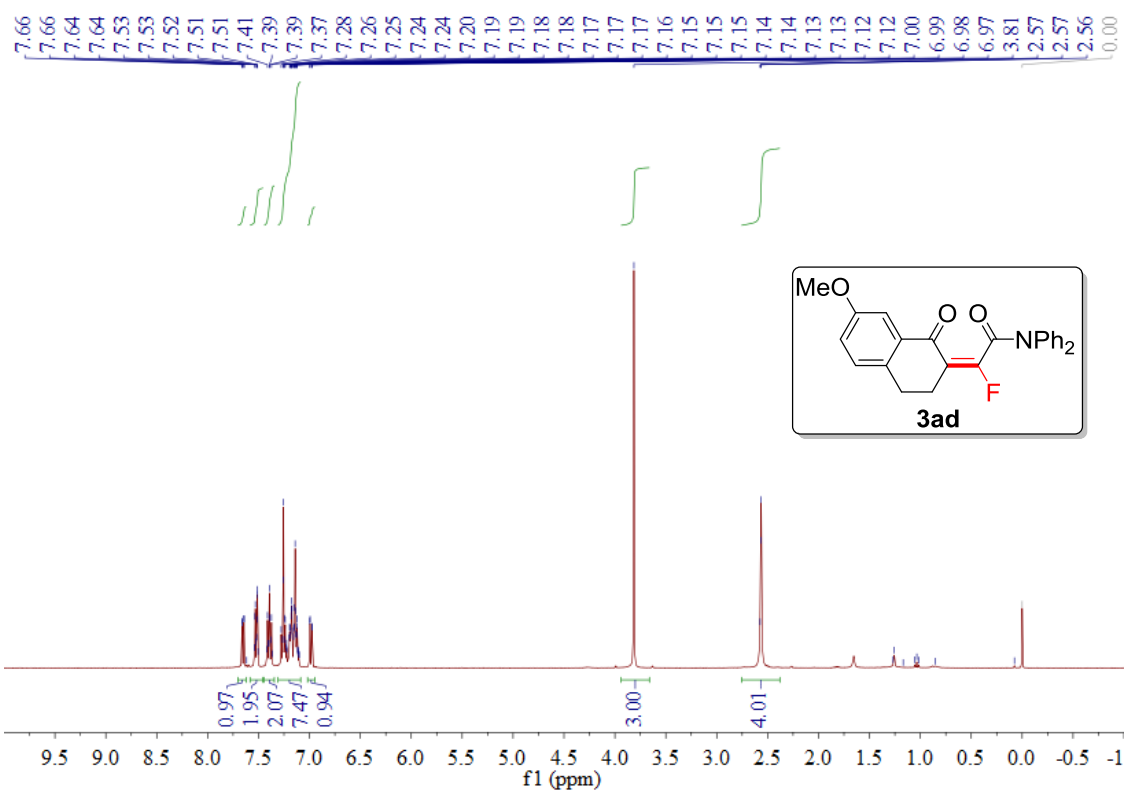

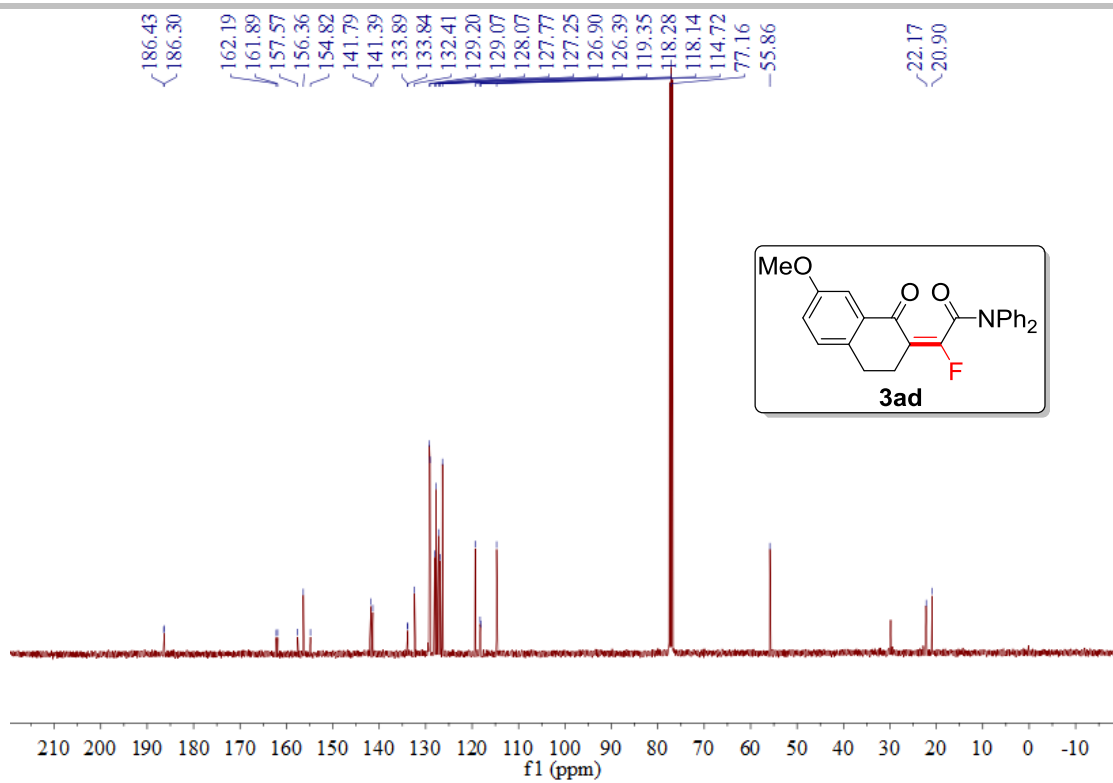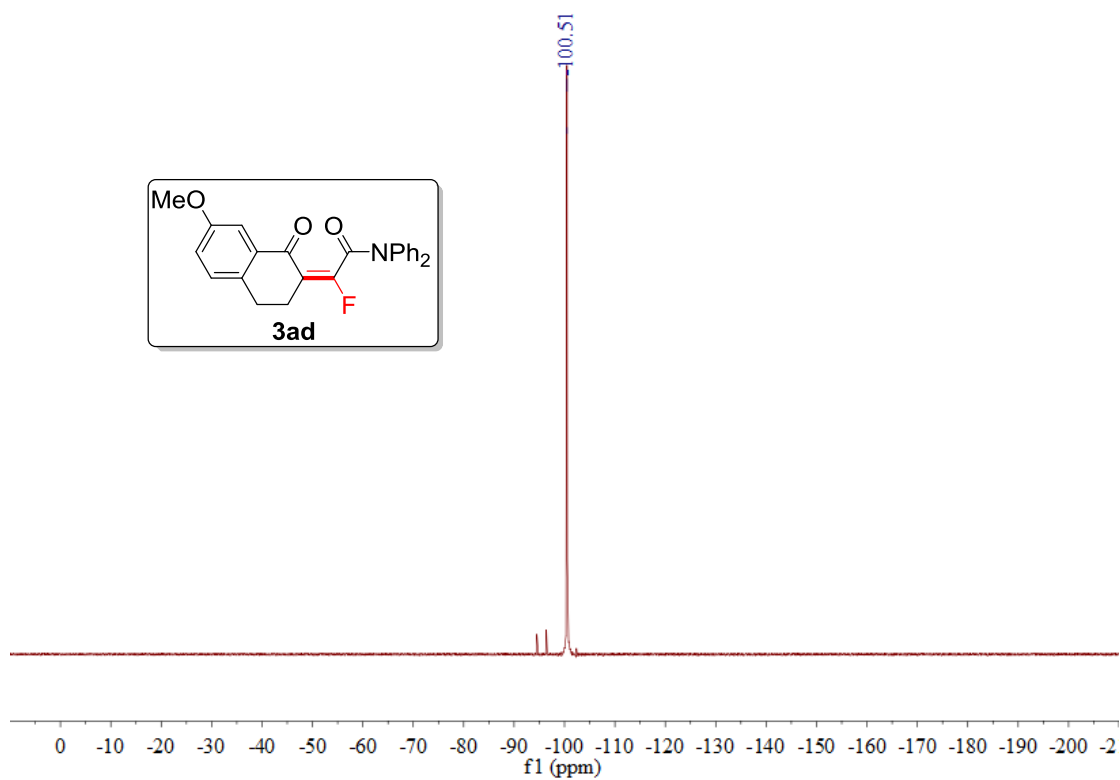

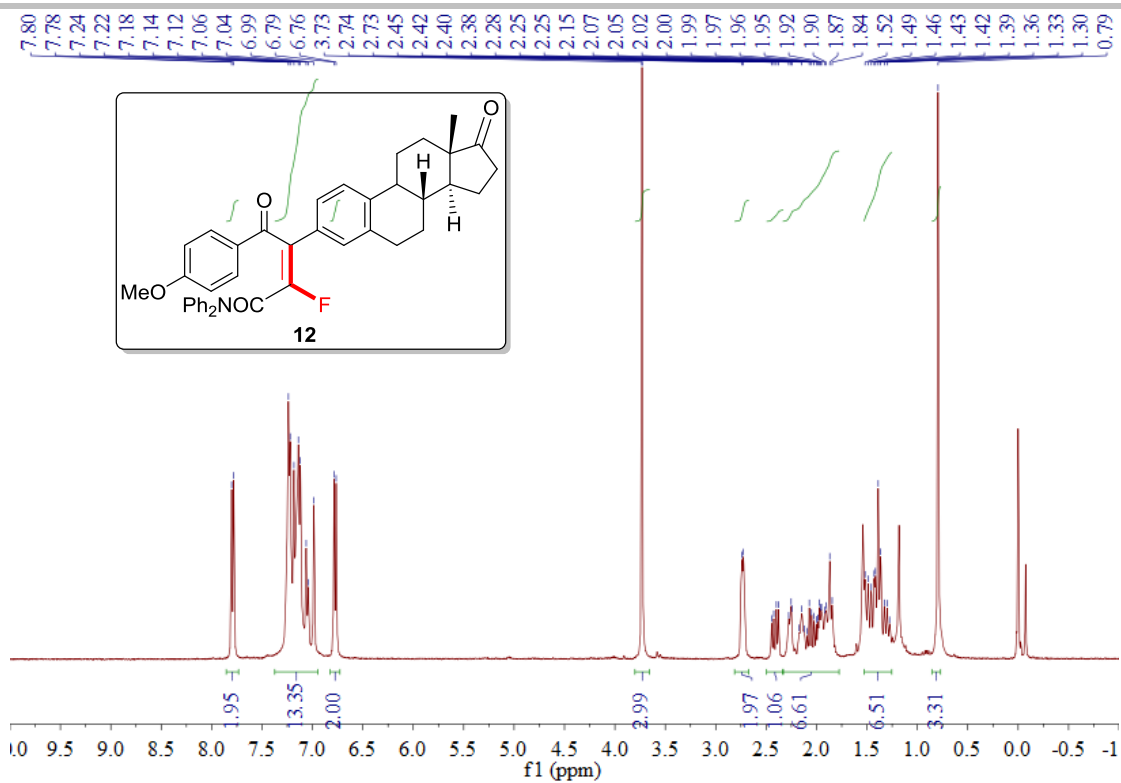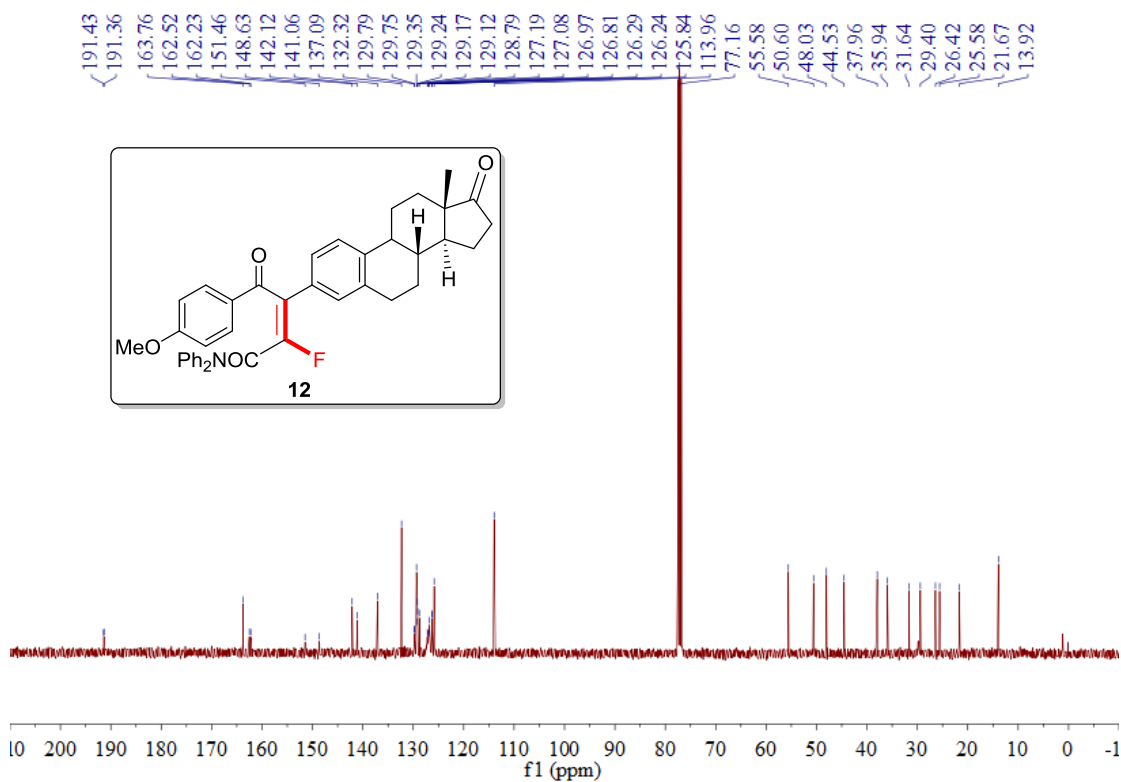

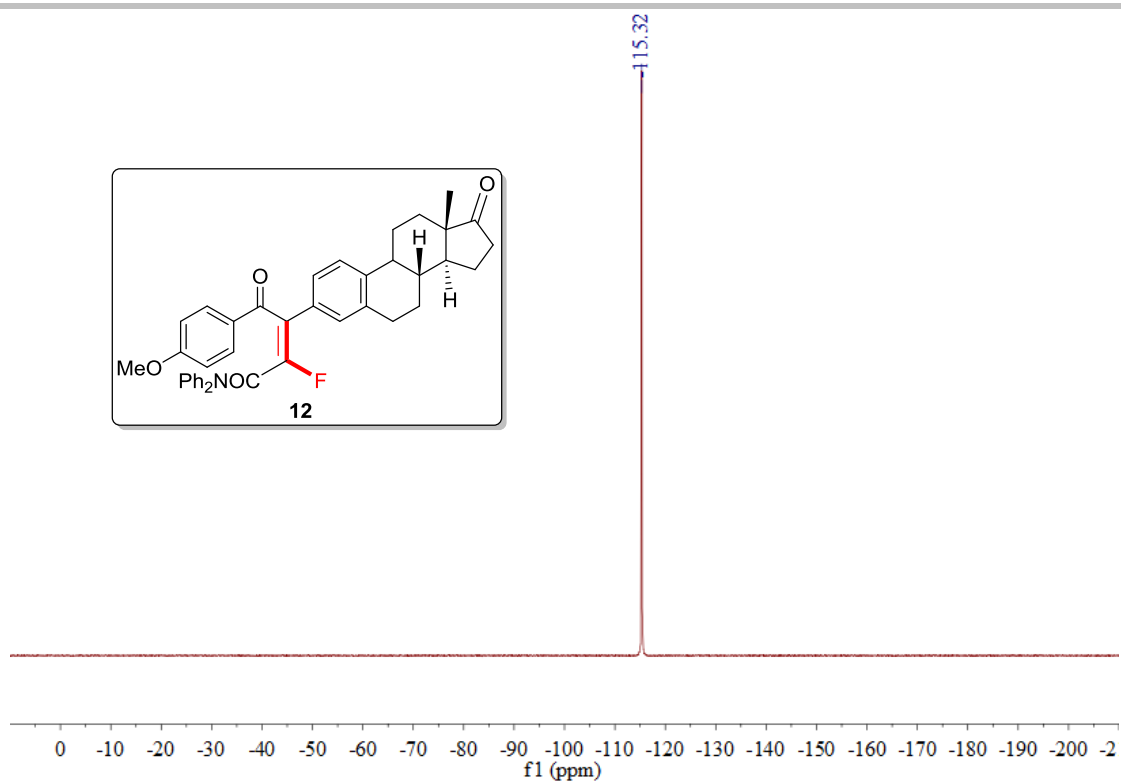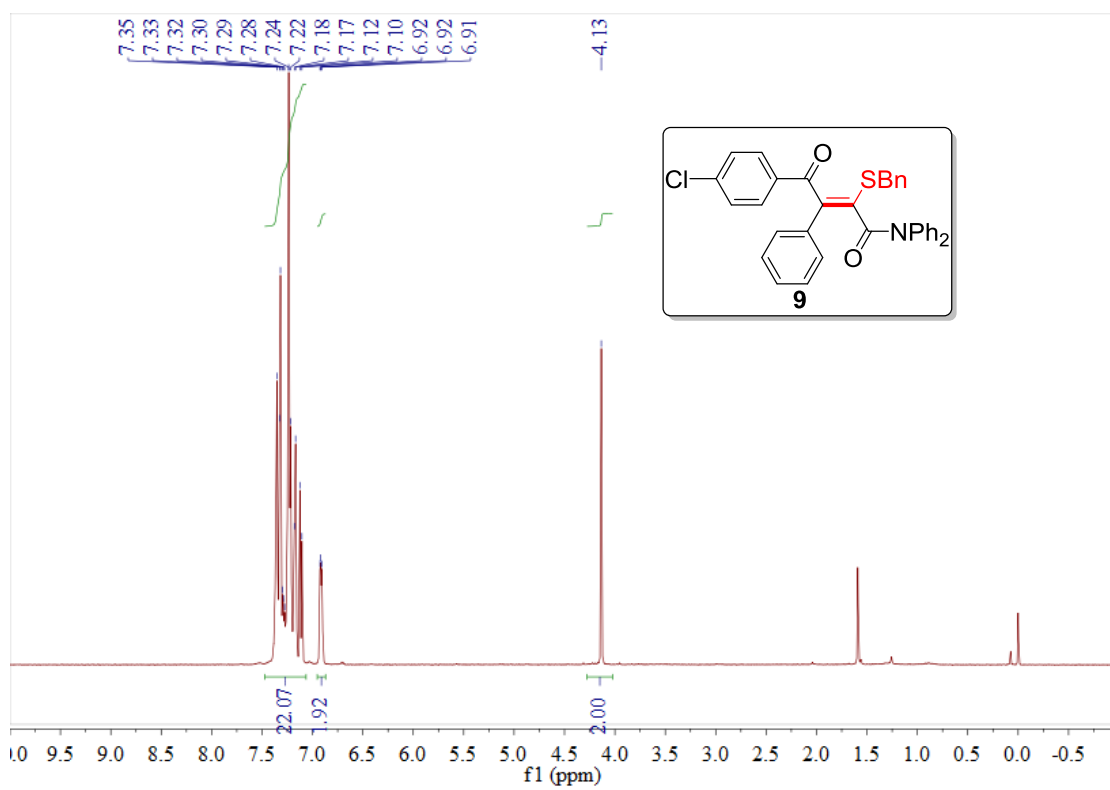

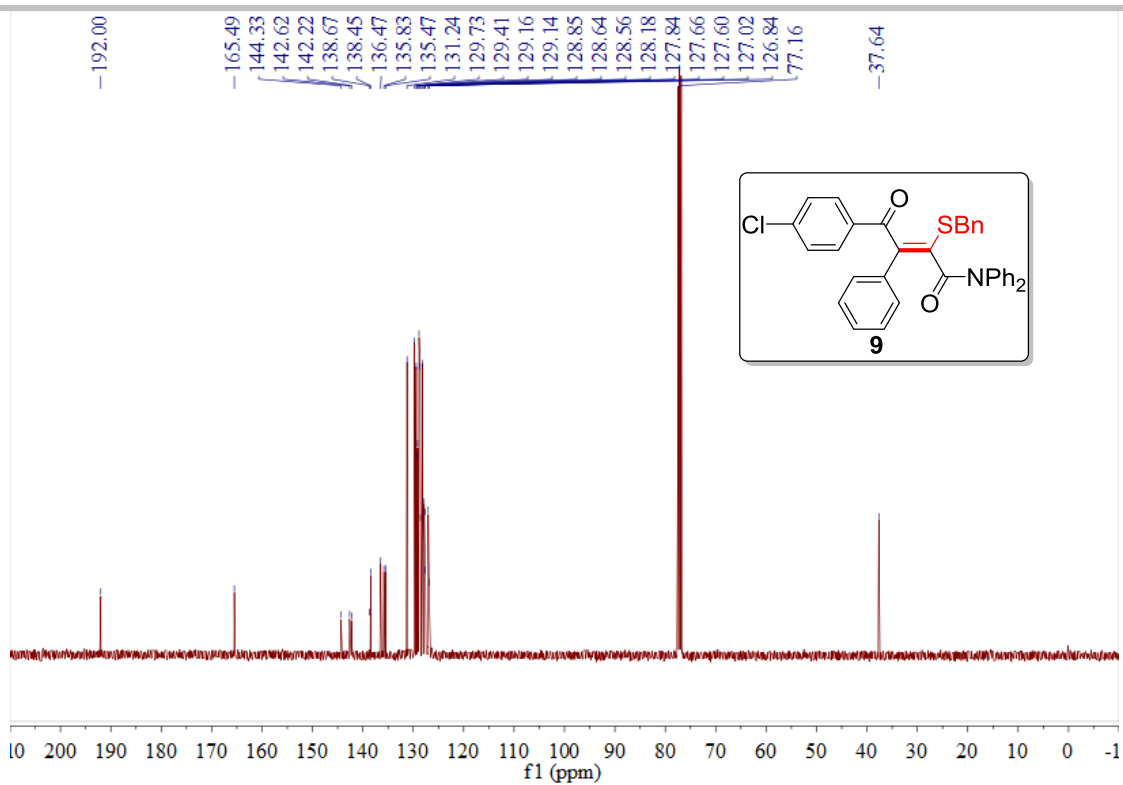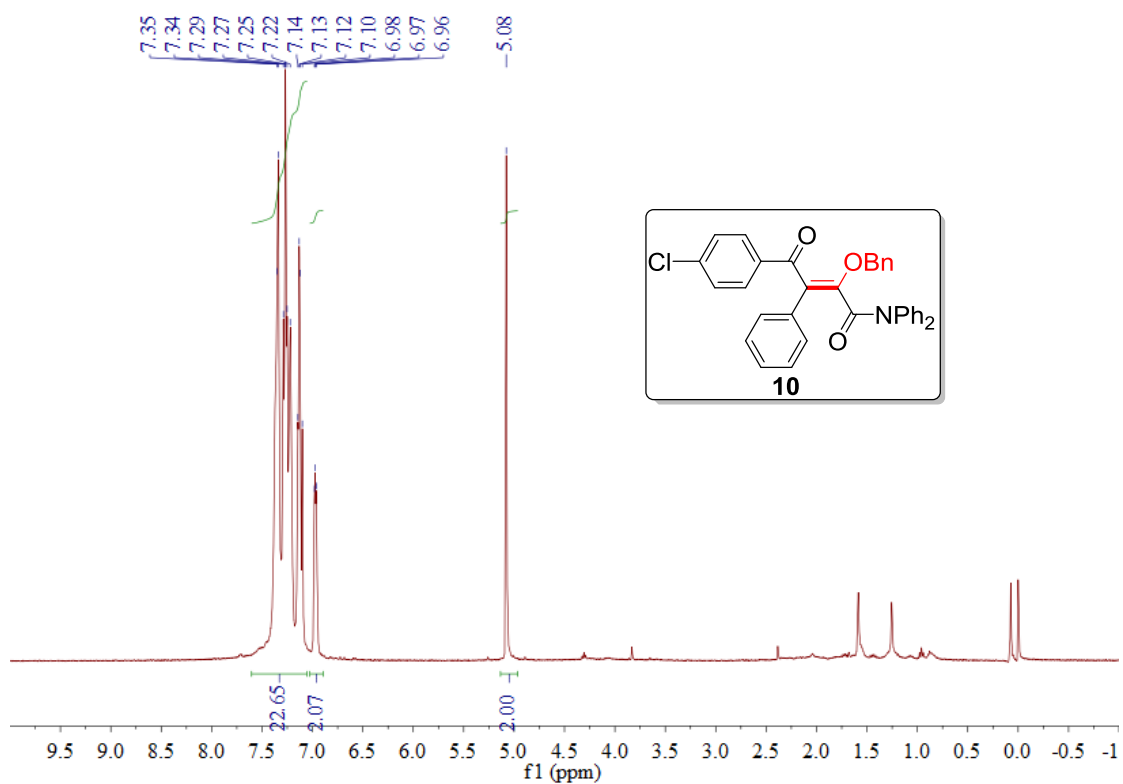

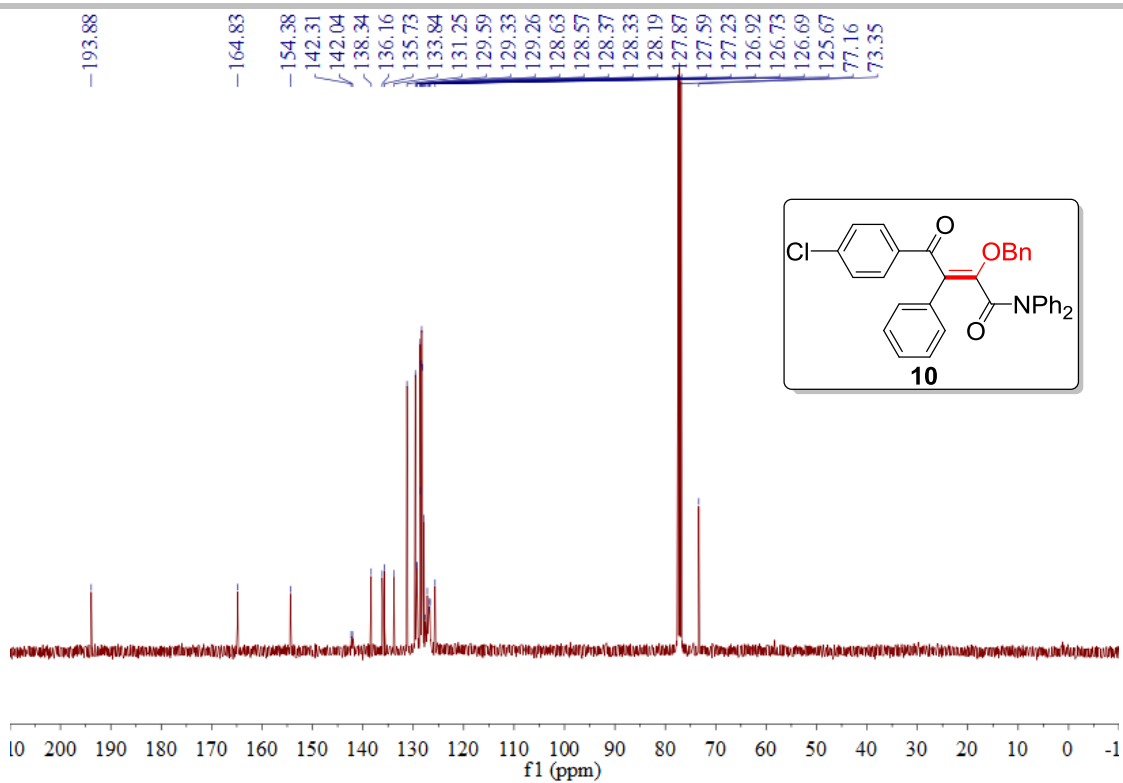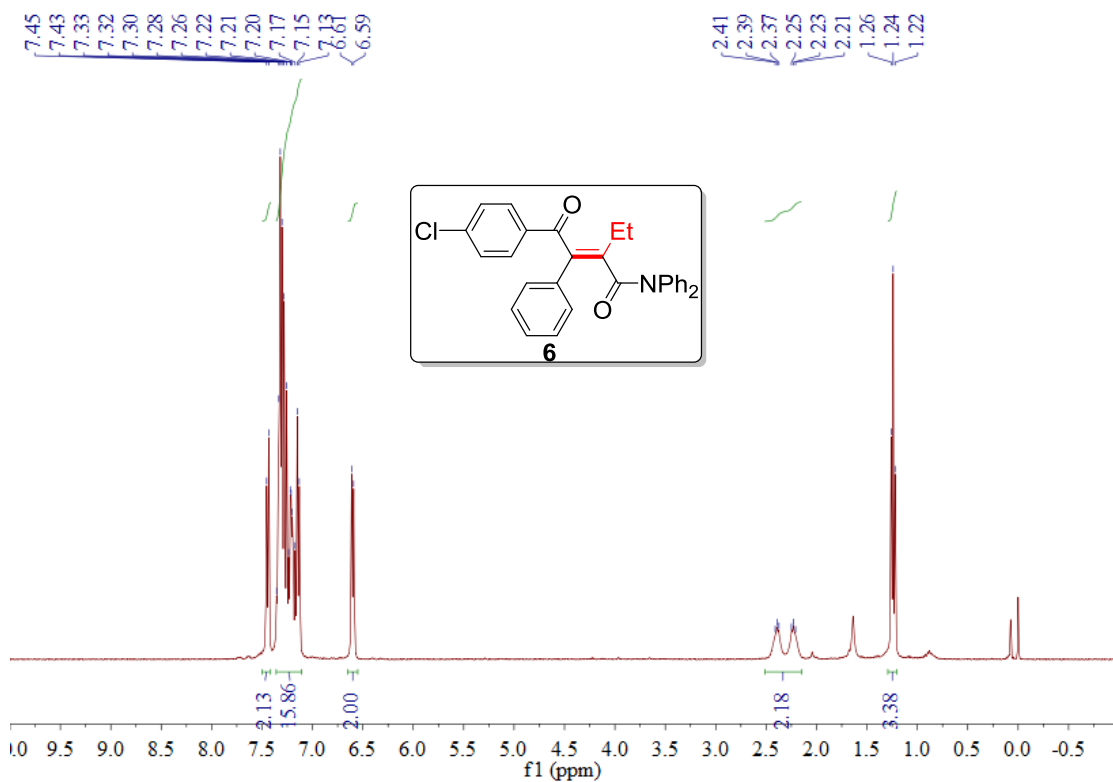



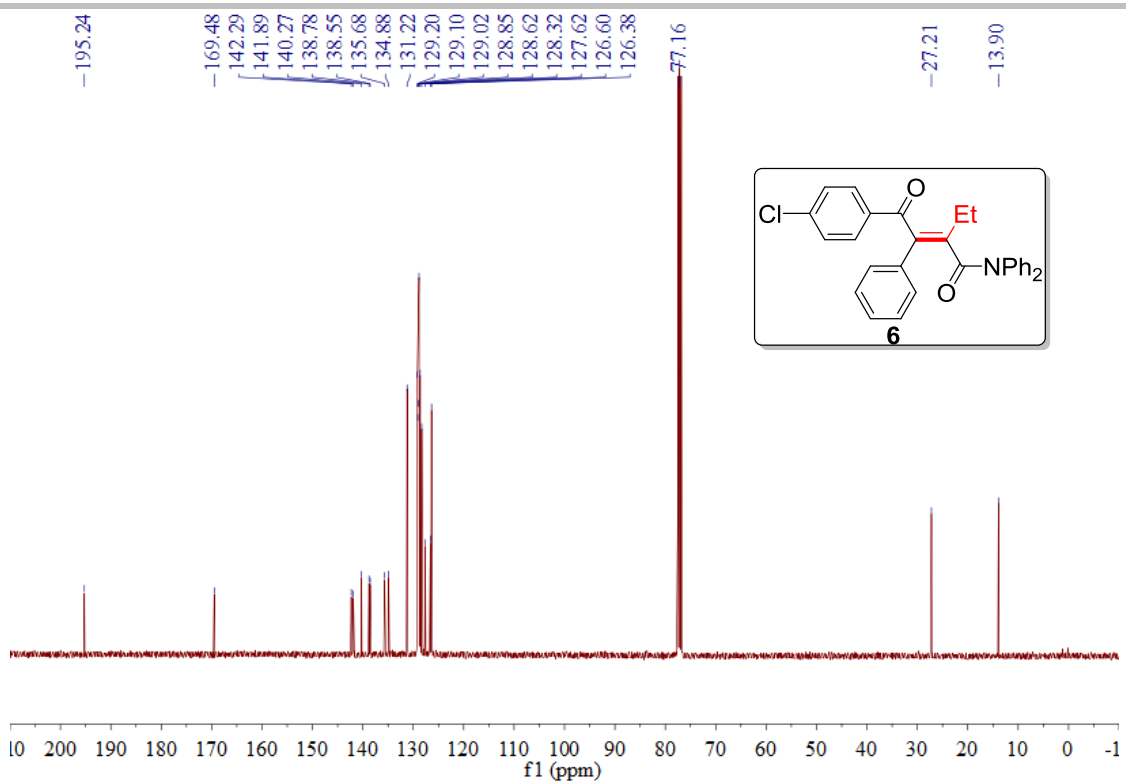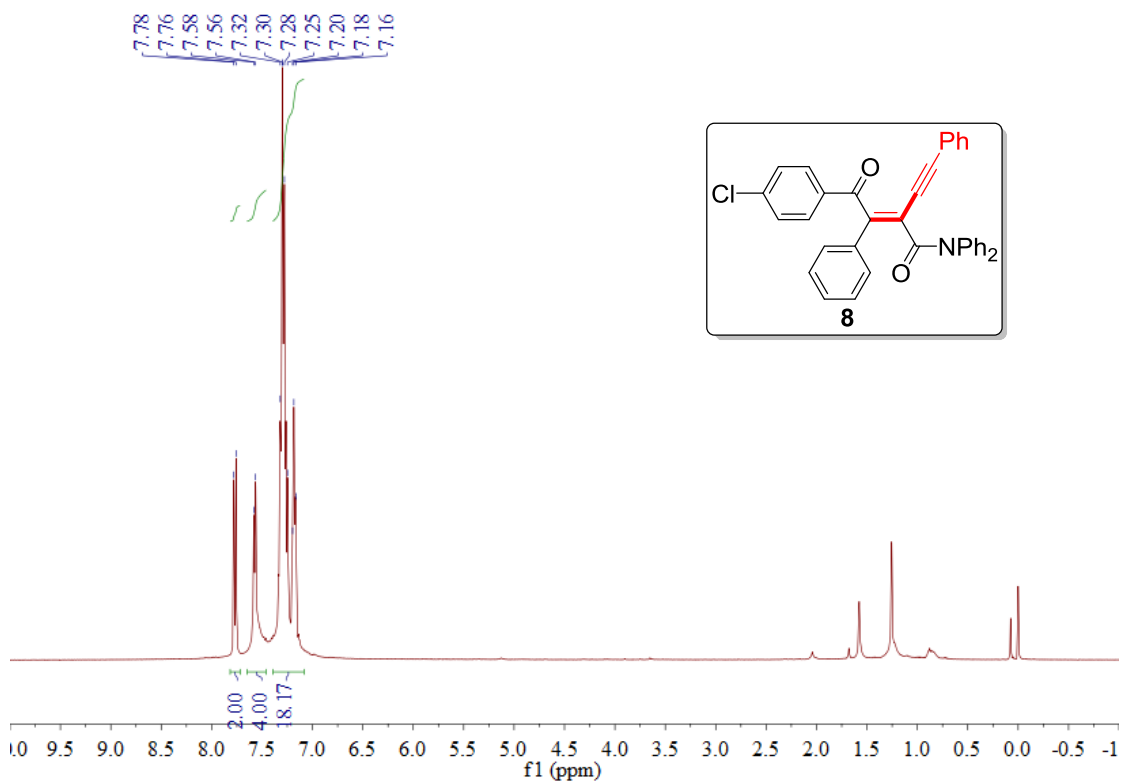

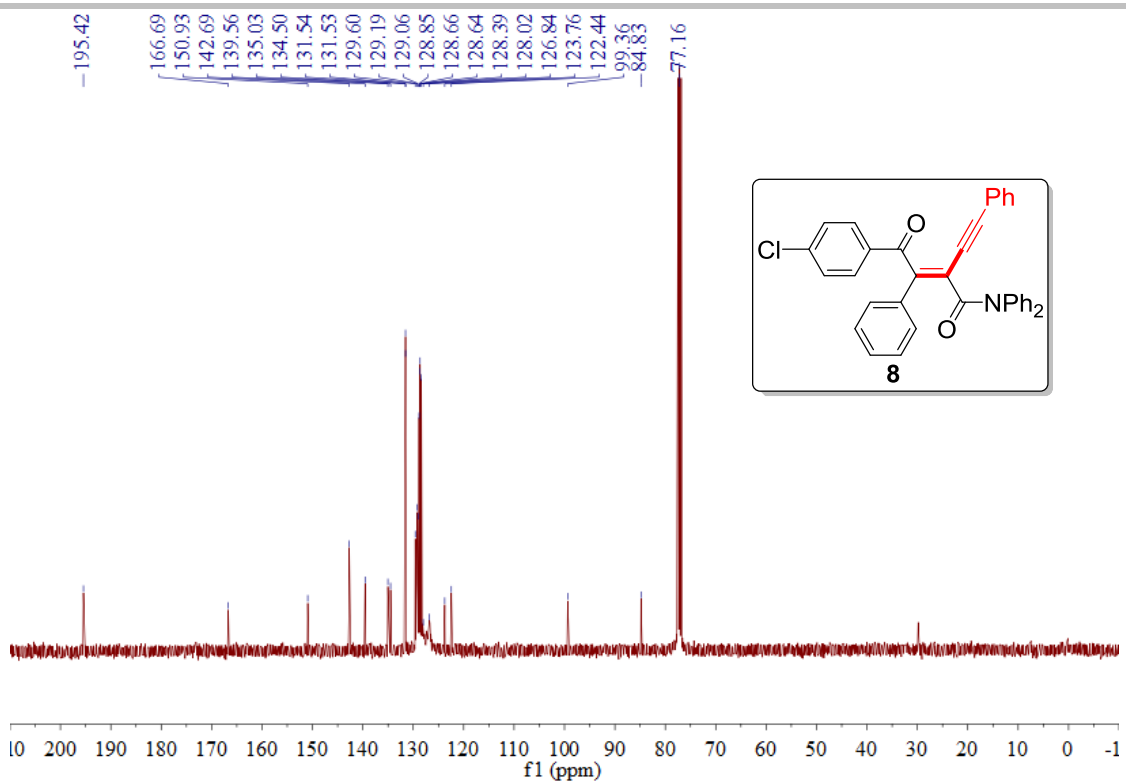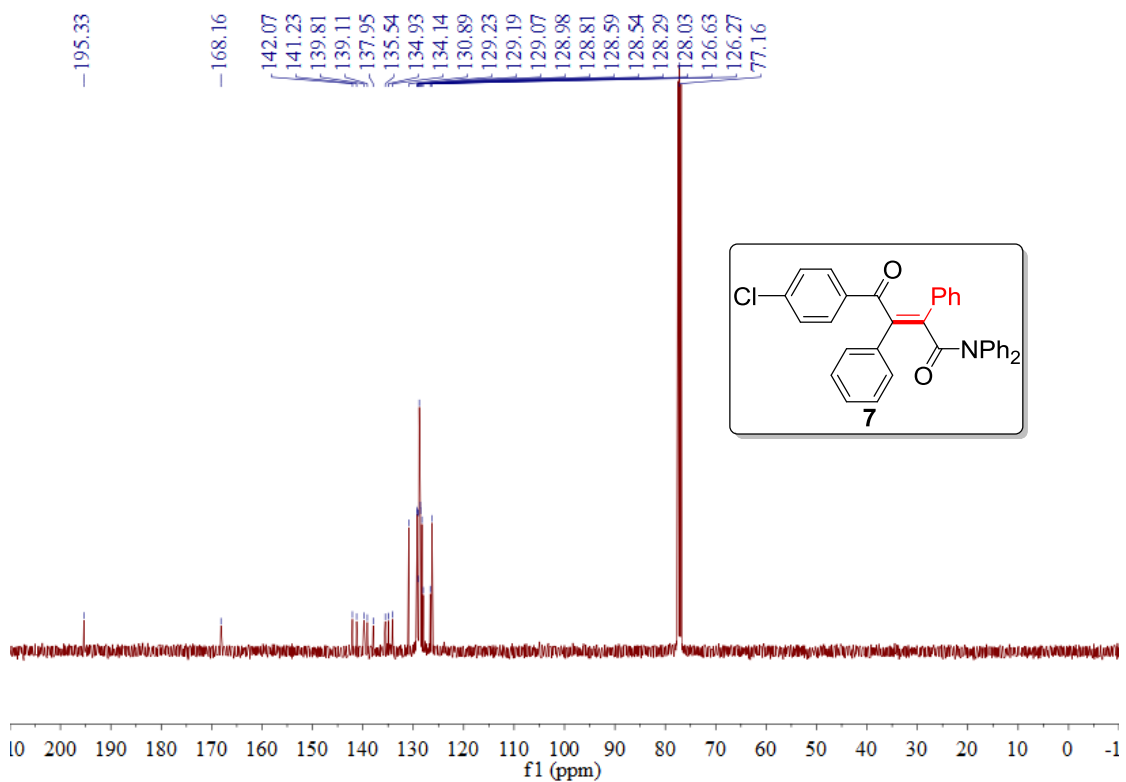

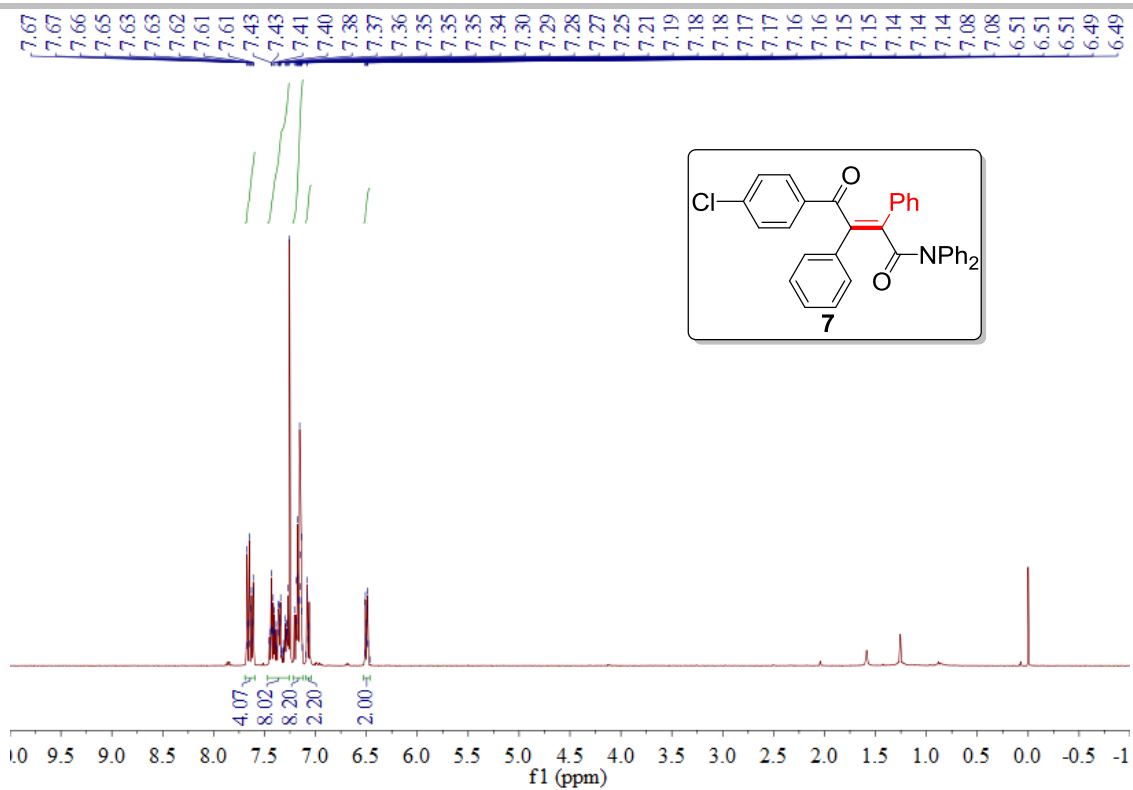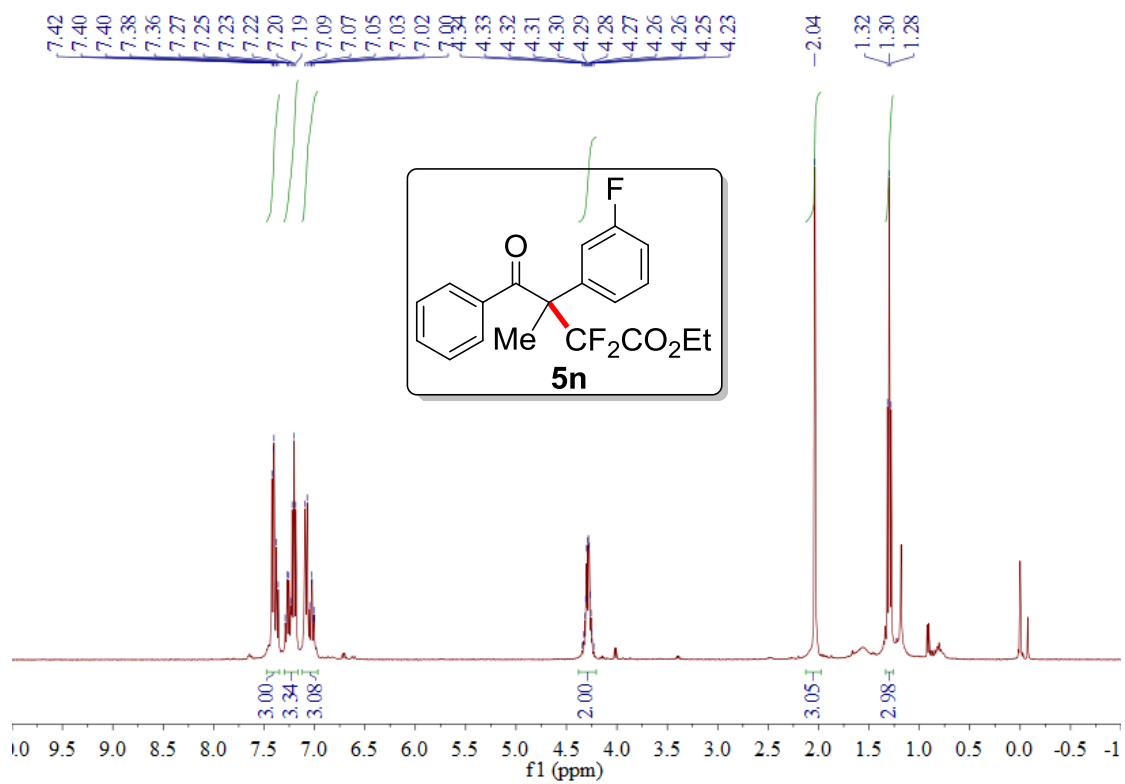

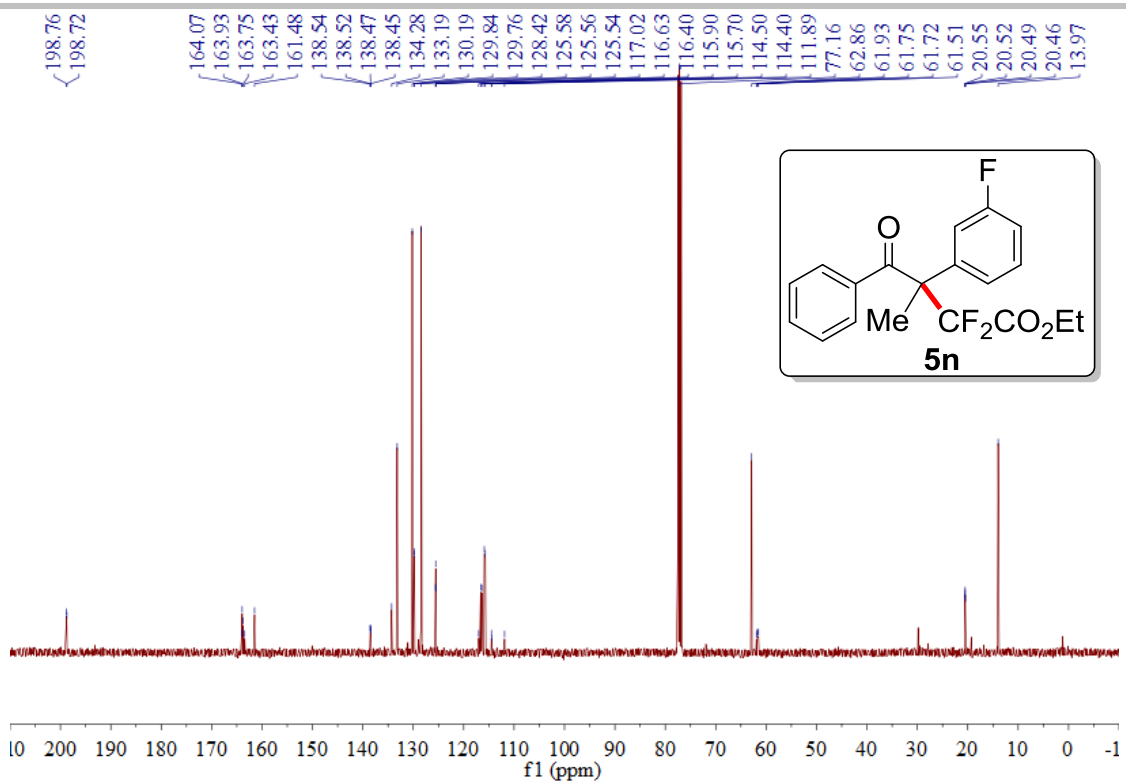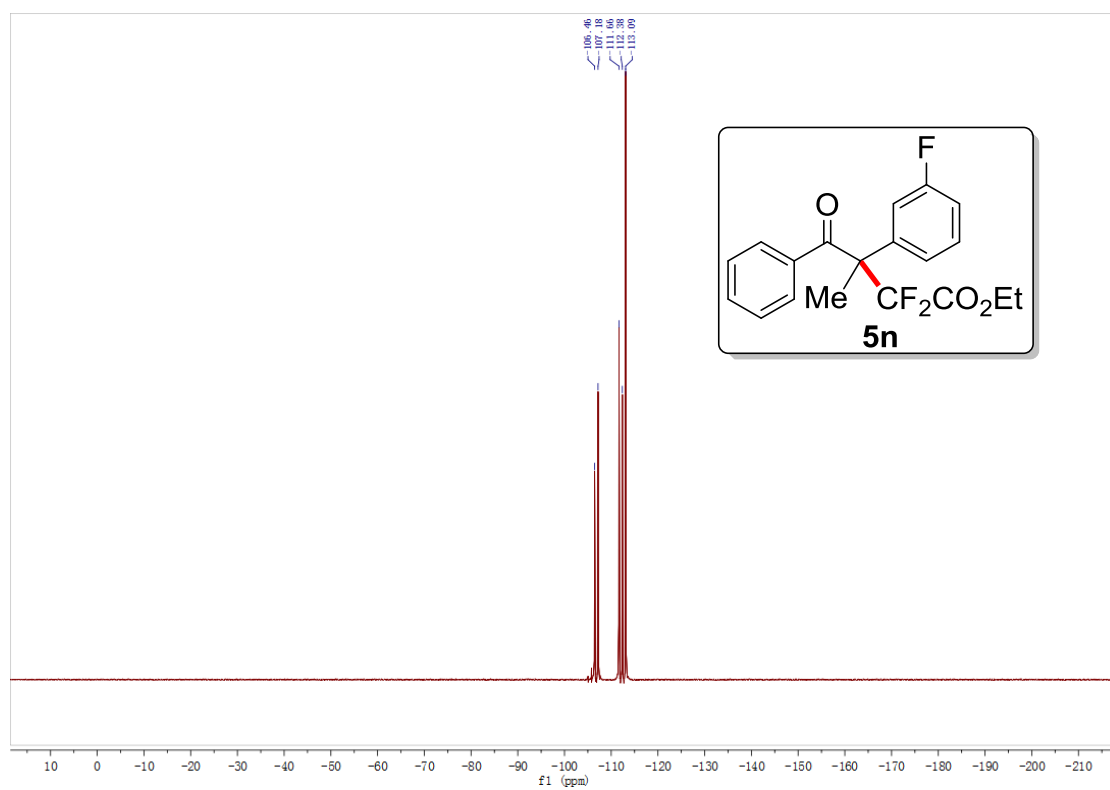

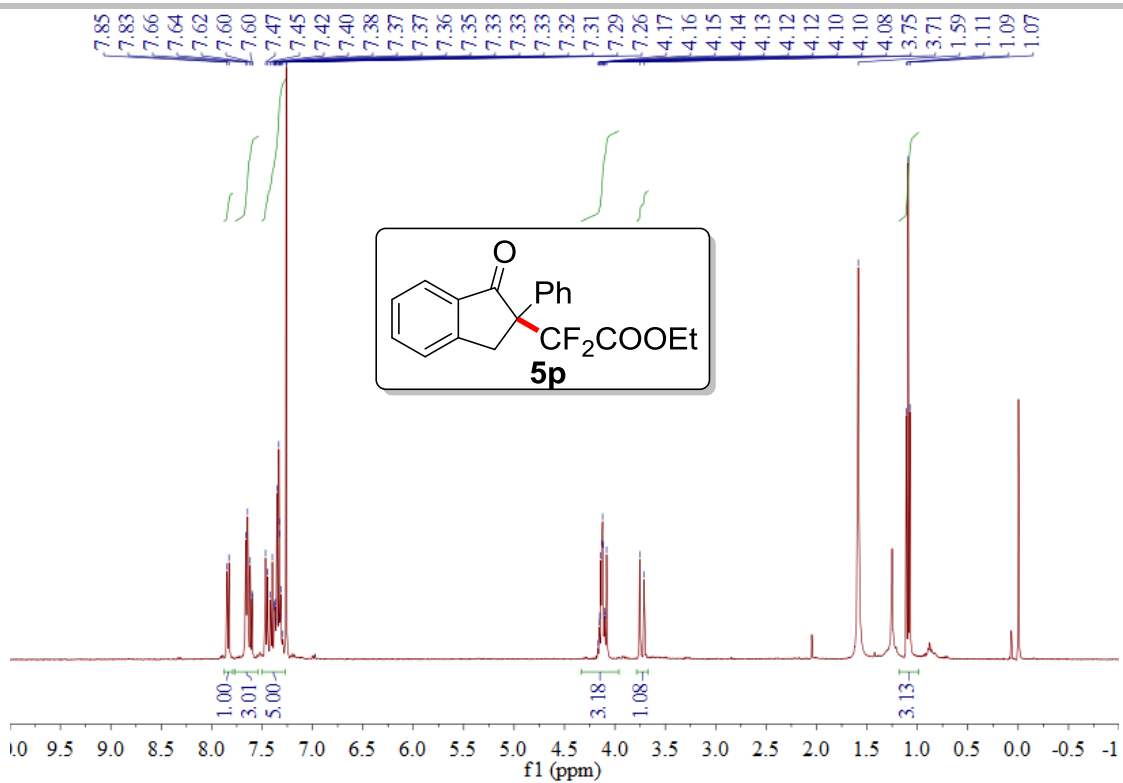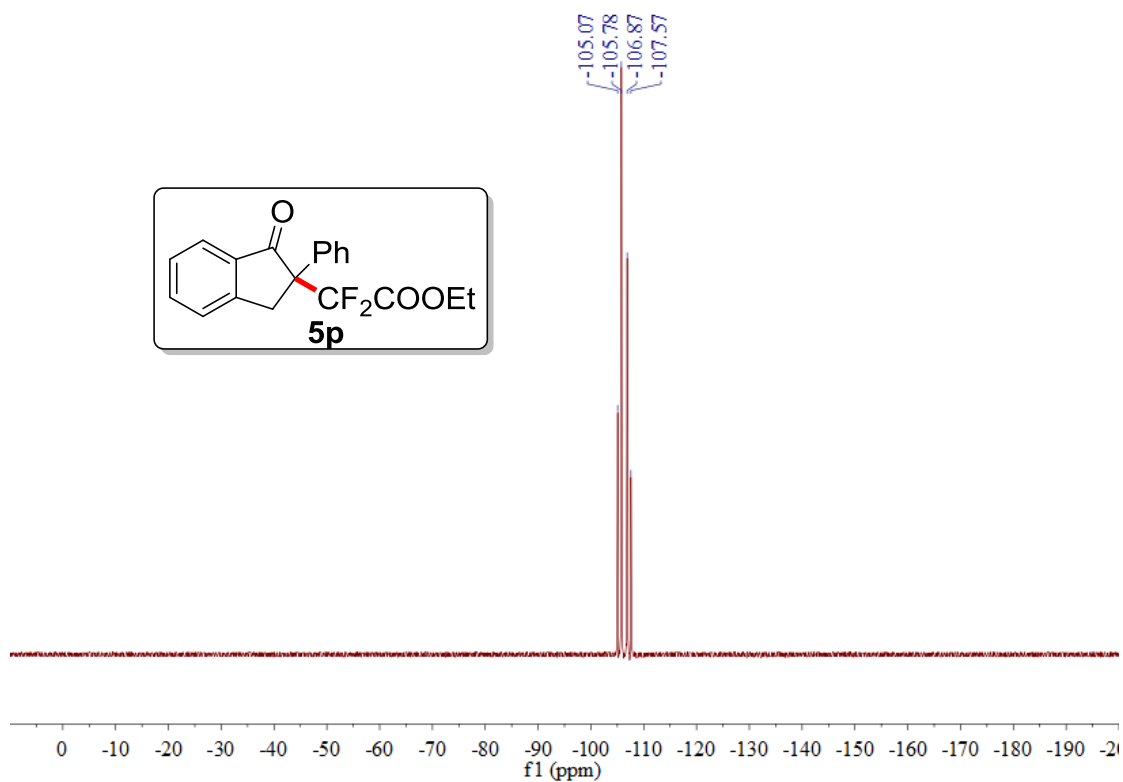

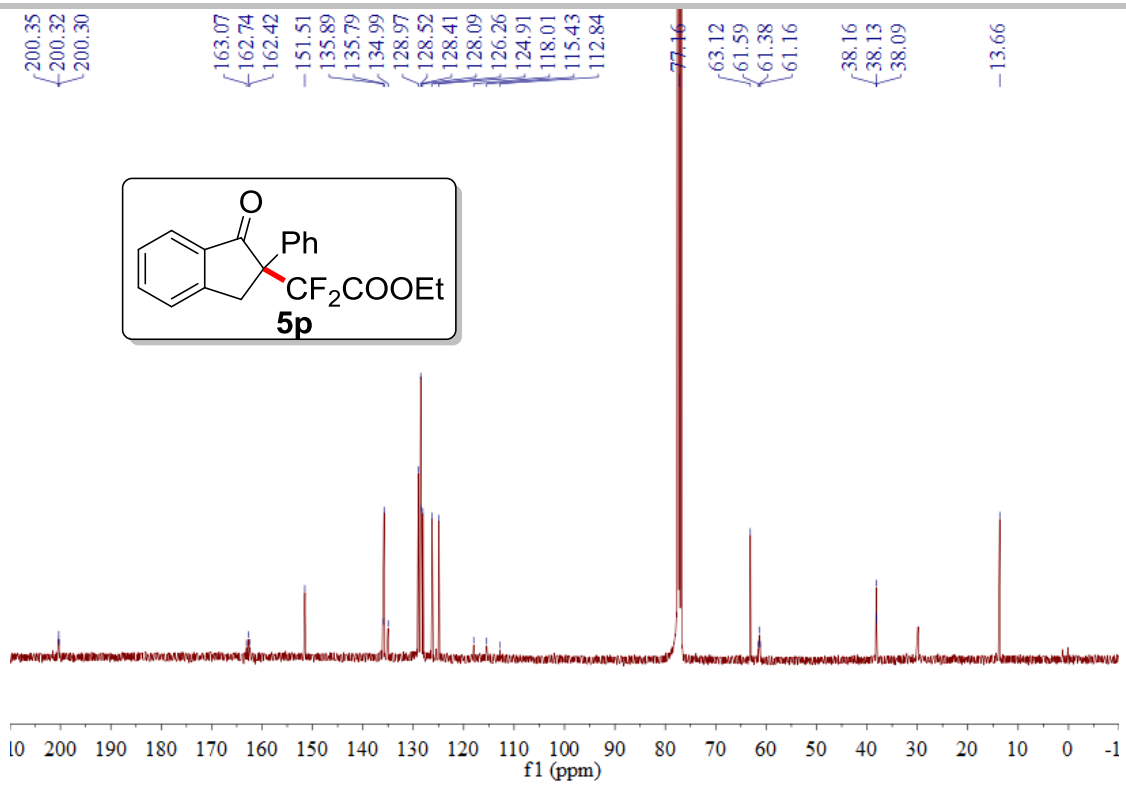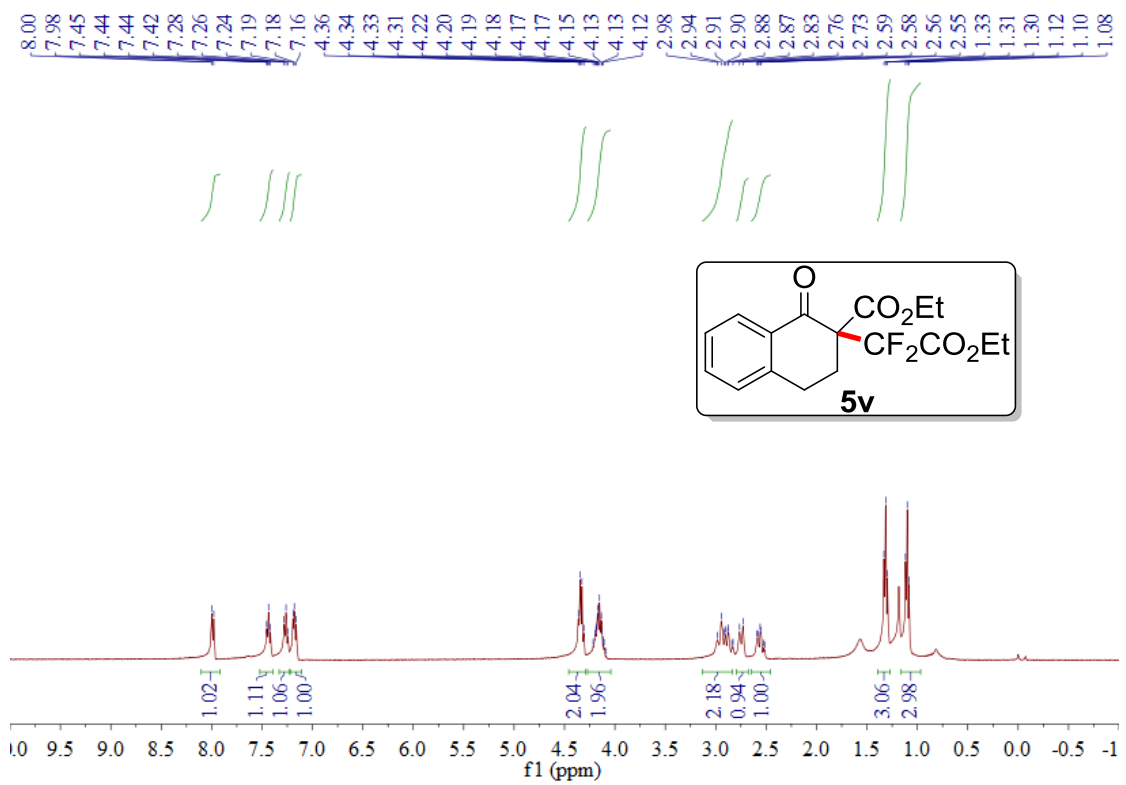

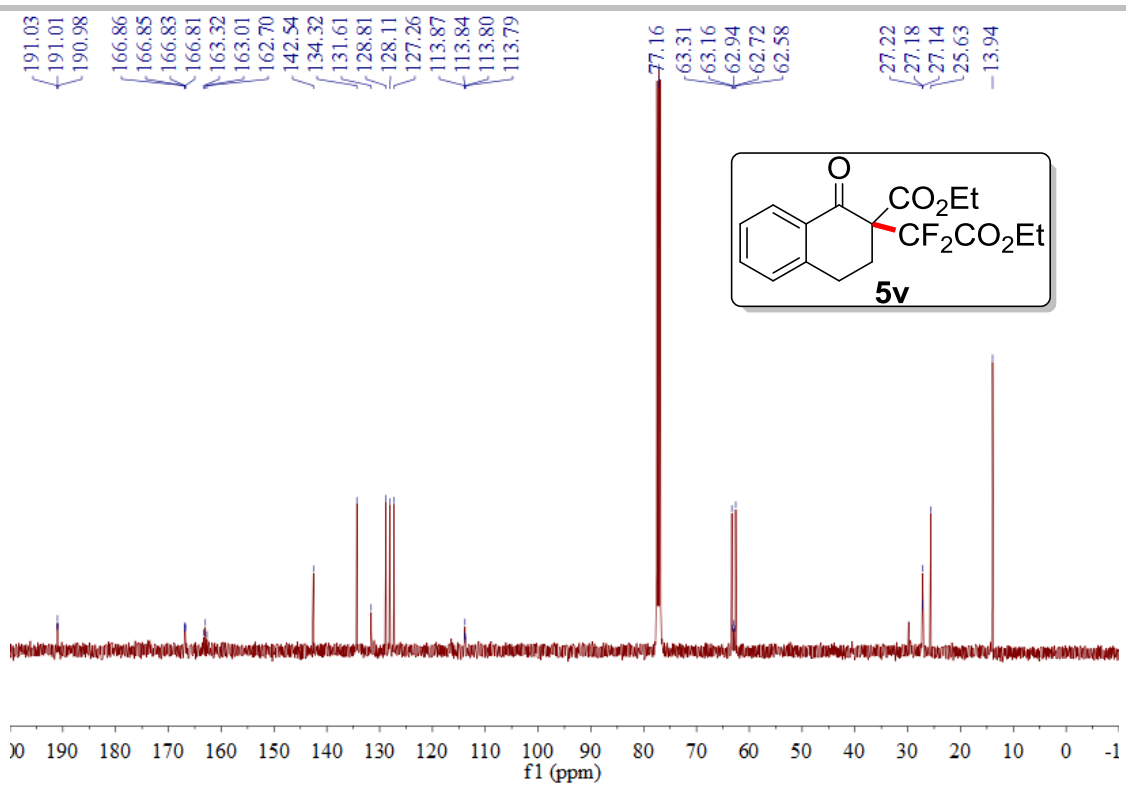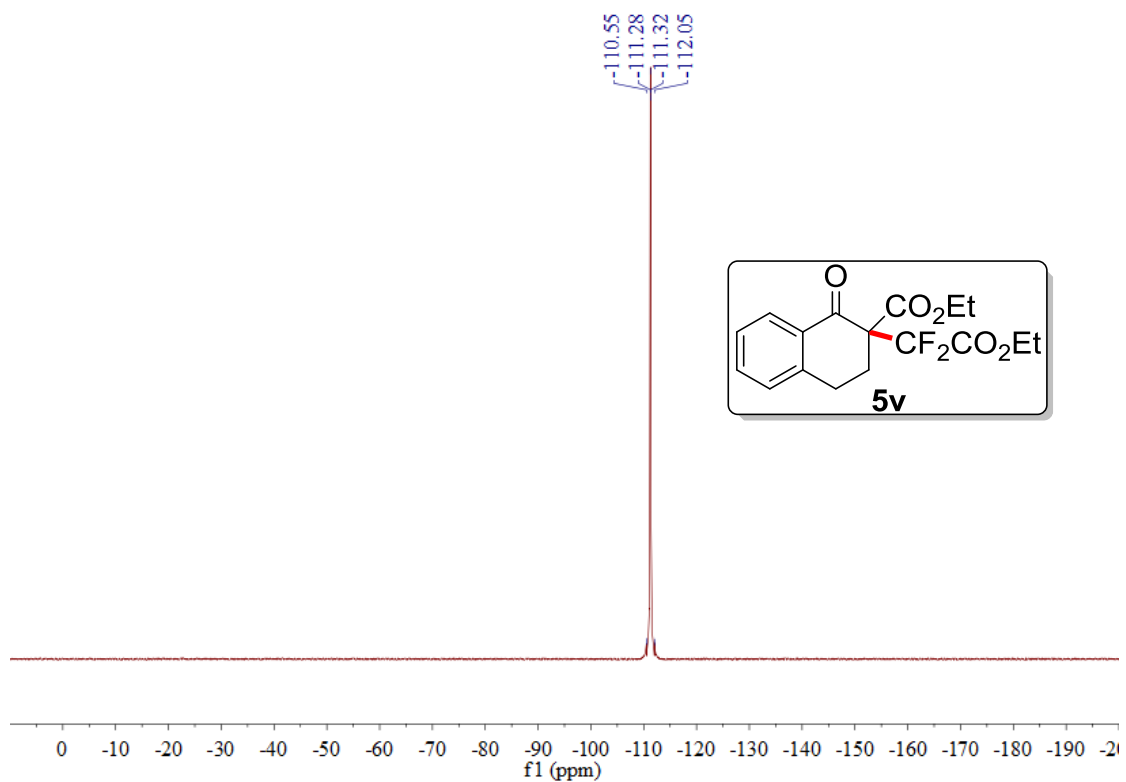

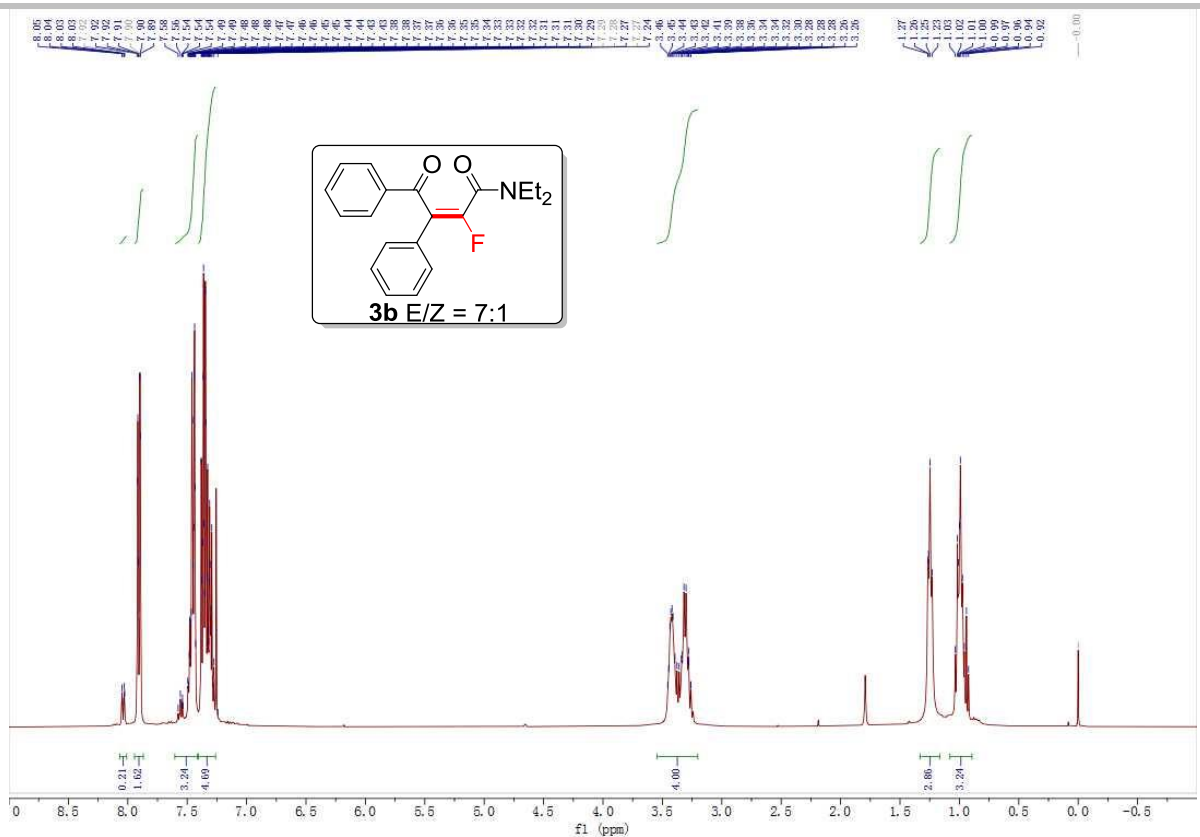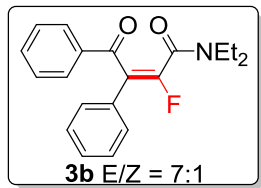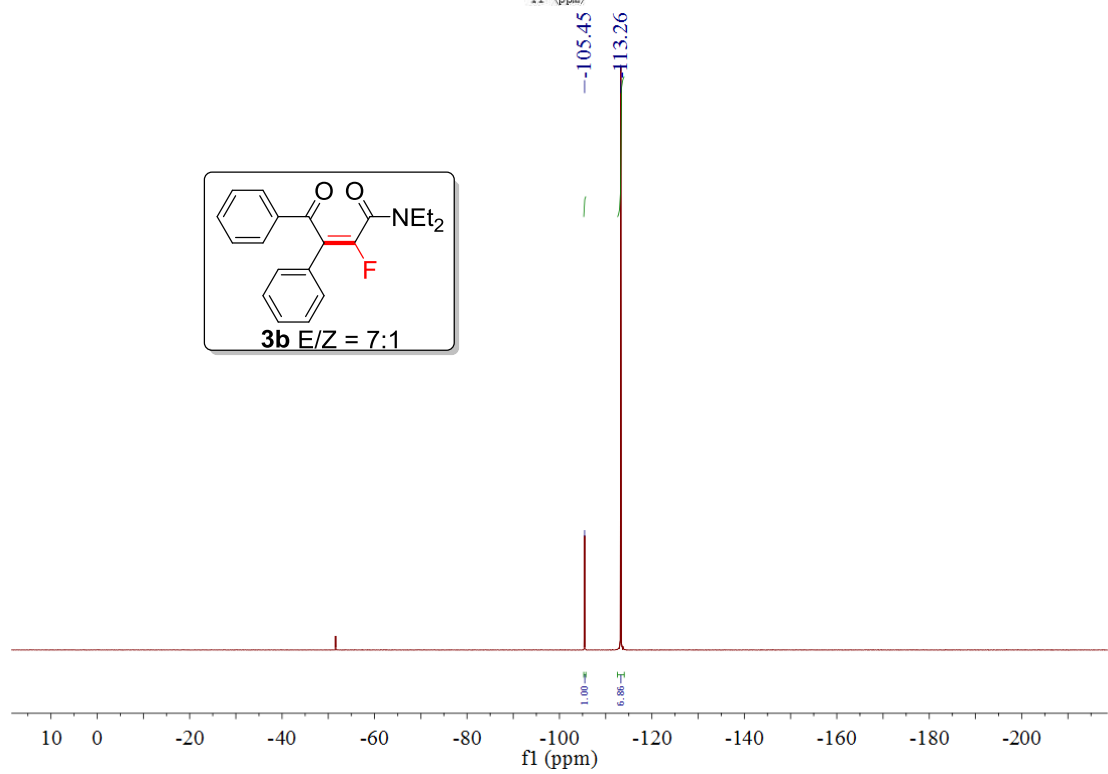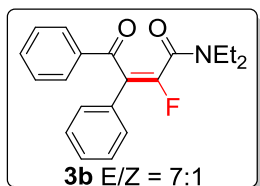



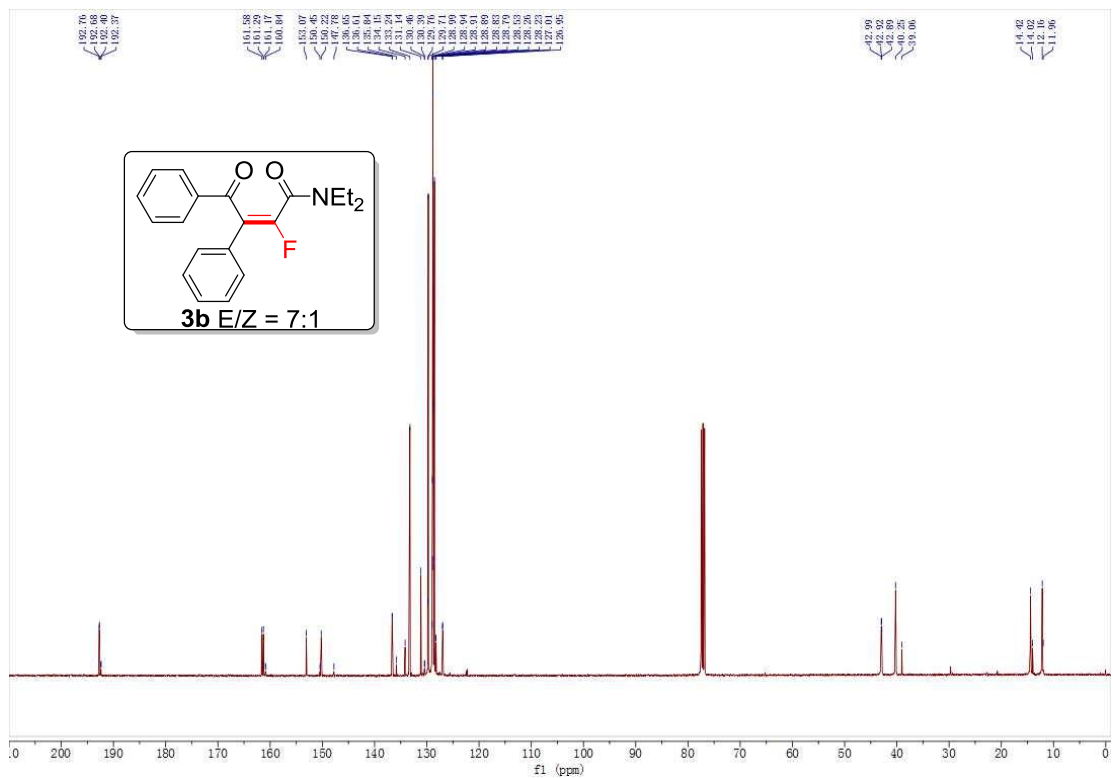

Supplement: SC-010-C9SC02806D-s001.pdf [file SC-010-C9SC02806D-s001.pdf]
